# Supplementary material for: Finding needles in haystacks: linking scientific names, reference specimens and molecular data for Fungi
Source: Oxford University Press journal article supplement (doi:10.1093/database/bau061), 2014-06-30
Supplement: bau061_Supplementary_Data.zip [file bau061_Supplementary_Data.zip]

Archive with 5 entries (5 files):
- NIH_Agreement_2.pdf
- Figure_S2.pptx
- Author_List.xlsx
- Figure_S1b.pptx
- Data_Accessions.xlsx
