# Supplementary material for: Finding needles in haystacks: linking scientific names, reference specimens and molecular data for Fungi
Source: Oxford University Press journal article supplement (doi:10.1093/database/bau061), 2014-06-30
Supplement: bau061_Supplementary_Data.zip [file bau061_Supplementary_Data.zip › Author_List.xlsx]

## Sheet: Sheet1
order	First names	Last name	superscript	Institution and department	email
1	Barbara	Robbertse	1	National Center for Biotechnology Information, National Library of Medicine, National Institutes of Health, Bethesda, Maryland, USA	robberts@ncbi.nlm.nih.gov
2	Conrad L.	Schoch	1	National Center for Biotechnology Information, National Library of Medicine, National Institutes of Health, Bethesda, Maryland, USA	schoch2@ncbi.nlm.nih.gov
3	Vincent	Robert	2	CBS-KNAW Fungal Biodiversity Centre, P.O. Box 85167, 3508 AD Utrecht, The Netherlands	v.robert@cbs.knaw.nl
4	Duong	Vu	2	CBS-KNAW Fungal Biodiversity Centre, P.O. Box 85167, 3508 AD Utrecht, The Netherlands	d.vu@cbs.knaw.nl
5	Gianluigi	Cardinali	3	Department of Pharmaceutical Sciences- Microbiology- Università degli Studi di Perugia, Perugia, Italy	gianlu@unipg.it
6	Laszlo	Irinyi	4	Molecular Mycology Research Laboratory, Centre for Infectious Diseases and Microbiology, Marie Bashier Institute for Infectious Diseases and Biosecurity, Sydney Medical School-Westmead Hospital, The University of Sydney, Westmead Millennium Institute, Westmead, Australia	irinyil@yahoo.fr
7	Wieland	Meyer	4	Molecular Mycology Research Laboratory, Centre for Infectious Diseases and Microbiology, Marie Bashier Institute for Infectious Diseases and Biosecurity, Sydney Medical School-Westmead Hospital, The University of Sydney, Westmead Millennium Institute, Westmead, Australia	wieland.meyer@sydney.edu.au
8	R. Henrik	Nilsson	5	Department of Plant and Environmental Sciences, University of Gothenburg, Box 461, Gothenburg, Sweden	henrik.nilsson@bioenv.gu.se
9	Karen	Hughes	6	Ecology and Evolutionary Biology, University of Tennessee, Knoxville, TN 37920, USA	khughes@utk.edu
10	Andrew N.	Miller	7	University of Illinois, Illinois Natural History Survey, 1816 South Oak Street, Champaign, IL 61820, USA	amiller7@illinois.edu
11	Paul M.	Kirk	8	Mycology Section, Jodrell Laboratory, Royal Botanic Gardens, Kew, Richmond, Surrey, TW9 3DS, United Kingdom	P.Kirk@kew.org
12	Kessy	Abarenkov	9	Natural History Museum, University of Tartu, 46 Vanemuise, 51014 Tartu, Estonia	kessy.abarenkov@ut.ee
13	M. Catherine	Aime	10	Purdue University, Department of Botany & Plant Pathology, 915 W. State Street, West Lafayette, IN 47907, USA	maime@purdue.edu
14	Hiran. A	Ariyawansa	11	Institute of Excellence in Fungal Research, and School of Science, Mae Fah Luang University, Chiang Rai 57100, Thailand	ariyawansa44@gmail.com
15	Martin	Bidartondo	12	Imperial College London, & Royal Botanic Gardens, Kew TW9 3DS, England, United Kingdom	m.bidartondo@imperial.ac.uk
16	Teun	Boekhout	2	CBS-KNAW Fungal Biodiversity Centre, P.O. Box 85167, 3508 AD Utrecht, The Netherlands	t.boekhout@cbs.knaw.nl
17	Bart	Buyck	13	Muséum National d’Histoire Naturelle, Dépt. Systématique et Evolution CP39, UMR7205, 12 Rue Buffon, F-75005 Paris, France	buyck@mnhn.fr
18	Qing	Cai	14	Kunming Institute of Botany, Chinese Academy of Sciences, Kunming 650201, Yunnan, P. R. China	caiqing223@yahoo.com.cn
19	Jie	Chen	11	Institute of Excellence in Fungal Research, and School of Science, Mae Fah Luang University, Chiang Rai 57100, Thailand	chenjie0917@gmail.com
20	Ana	Crespo	15	Departamento de Biología Vegetal II, Facultad de Farmacia, Universidad Complutense de Madrid, Madrid 28040, Spain	acrespo@farm.ucm.es
21	Pedro W.	Crous	2	CBS-KNAW Fungal Biodiversity Centre, P.O. Box 85167, 3508 AD Utrecht, The Netherlands	p.crous@cbs.knaw.nl
22	Ulrike	Damm	16	Senckenberg Museum of Natural History Görlitz, PF 300 154, 02806 Görlitz, Germany	u.damm@cbs.knaw.nl
23	Z. Wilhelm	De Beer	17	Department of Microbiology and Plant Pathology, Forestry & Agricultural Biotechnology Institute (FABI), University of Pretoria, Pretoria, 0001, South Africa	Wilhelm.DeBeer@fabi.up.ac.za
24	Bryn T.M.	Dentinger	18	Mycology Section, Jodrell Laboratory, Royal Botanic Gardens, Kew, Richmond, Surrey, TW9 3DS, United Kingdom	bryn.dentinger@gmail.com
25	Pradeep K.	Divakar	15	Departamento de Biología Vegetal II, Facultad de Farmacia, Universidad Complutense de Madrid, Madrid 28040, Spain	pdivakar@farm.ucm.es
26	Margarita	Dueñas	19	Real Jardín Botánico, RJB-CSIC, Plaza de Murillo 2, 28014 Madrid, Spain	mduenas@rjb.csic.es
27	Nicolas	Feau	20	Department of Forest and conservation sciences, Faculty of Forestry, The University of British Columbia, 2424 Main Mall, Vancouver, BC, Canada	feaunico@mail.ubc.ca
28	Katerina	Fliegerova	21	Institute of Animal Physiology and Genetics, Czech Academy of Sciences, v.v.i., Videnska 1083, Prague, Czech Republic	fliegerova@iapg.cas.cz
29	Miguel A.	García	22	Department of Biology, University of Toronto, 3359 Mississagua Road, Mississagua, Ontario, L5L 1C6, Canada.
30	Zai-Wei	Ge	14	Kunming Institute of Botany, Chinese Academy of Sciences, Kunming 650201, Yunnan, P. R. China	zaiweige@gmail.com
31	Gareth W.	Griffith	23	Institute of Biological, Environmental and Rural Sciences, Prifysgol Aberystwyth, Aberystwyth, Ceredigion Wales SY23 3DD, United Kingdom	gwg@aber.ac.uk
32	Johannes Z.	Groenewald	2	CBS-KNAW Fungal Biodiversity Centre, P.O. Box 85167, 3508 AD Utrecht, The Netherlands	e.groenewald@cbs.knaw.nl
33	Marizeth	Groenewald	2	CBS-KNAW Fungal Biodiversity Centre, P.O. Box 85167, 3508 AD Utrecht, The Netherlands	m.groenewald@cbs.knaw.nl
34	Martin	Grube	24	Institute of Plant Sciences, Karl-Franzens-University, Holteigasse 6, 8010 Graz, Austria	martin.grube@uni-graz.at
35	Marieka	Gryzenhout	25	Department of Plant Sciences, University of the Free State, P.O. Box 339, Bloemfontein 9300, South Africa	Gryzenhoutm@ufs.ac.za
36	Cécile	Gueidan	26	CSIRO-Plant Industry, CANBR, GPO Box 1600, Canberra ACT 2601, Australia	Cecile.Gueidan@csiro.au
37	Liangdong	Guo	27	State Key Laboratory of Mycology, Institute of Microbiology, Chinese Academy of Sciences, Beijing, China	guold@im.ac.cn
38	Sarah	Hambleton	28	Biodiversity (Mycology and Microbiology) Agriculture and Agri-Food Canada , 960 Carling Avenue, Ottawa, Ontario, Canada	Sarah.Hambleton@AGR.GC.CA
39	Richard	Hamelin	29	Department of Forest and conservation sciences, Faculty of Forestry, The University of British Columbia, 2424 Main Mall, Vancouver, BC, Canada	Richard.Hamelin@ubc.ca
40	Karen	Hansen	30	Department of Botany, Swedish Museum of Natural History, P.O. Box 50007, SE-104 05, Stockholm, Sweden	Karen.Hansen@nrm.se
41	Valérie	Hofstetter	31	Agroscope Changins-Wädenswil Research Station ACW, Département de recherche en Protection des végétaux grandes cultures et vigne/Viticulture et oenologie, CP 1012, CH-1260 Nyon, Switzerland	valerie.hofstetter@agroscope.admin.ch
42	Seung-Beom	Hong	32	Korean Agricultural Culture Collection, National Academy of Agricultural Science, RDA, Suwon, 441-707, Korea	funguy@korea.kr
43	Jos	Houbraken	2	CBS-KNAW Fungal Biodiversity Centre, P.O. Box 85167, 3508 AD Utrecht, The Netherlands	j.houbraken@cbs.knaw.nl
44	Kevin D.	Hyde	11	Institute of Excellence in Fungal Research, and School of Science, Mae Fah Luang University, Chiang Rai 57100, Thailand	kdhyde3@gmail.com
45	Patrik	Inderbitzin	33	University of California, Davis Department of Plant Pathology Davis, CA, 95616, USA	prin@ucdavis.edu
46	Peter R.	Johnston	34	Landcare Research, Private Bag 92170, Auckland 1142, New Zealand	JohnstonP@landcareresearch.co.nz
47	Samantha C.	Karunarathna	11	Institute of Excellence in Fungal Research, and School of Science, Mae Fah Luang University, Chiang Rai 57100, Thailand	samakaru931@yahoo.com
48	Urmas	Kõljalg	9	Natural History Museum, University of Tartu, 46 Vanemuise, 51014 Tartu, Estonia	urmas.koljalg@ut.ee
49	Gábor M.	Kovács	35	Eötvös Loránd University, Institute of Biology, Department of Plant Anatomy, Pázmány Péter sétány 1/c, 1117 Budapest, Hungary	gmkovacs@caesar.elte.hu
			61	Plant Protection Institute, Centre for Agricultural Research, Hungarian Academy of Sciences, Budapest, H-1525, Hungary
50	Ekaphan	Kraichak	36	Science and Education, The Field Museum, 1400 S. Lake Shore Drive, Chicago, IL 60605, USA	ekraichak@fieldmuseum.org
51	Krisztina	Krizsan	37	University of Szeged, Faculty of Science and Informatics, Department of Microbiology, Kozep fasor 52, Szeged, H-6726, Hungary	krizsank@gmail.com
52	Cletus P.	Kurtzman	38	Bacterial Foodborne Pathogens and Mycology Research Unit, U.S. Department of Agriculture, National Center for Agricultural Utilization Research, Agricultural Research Service, 1815 North University Street, Peoria, IL 61604, USA	Cletus.Kurtzman@ARS.USDA.GOV
53	Karl-Henrik	Larsson	39	Natural History Museum, P.O. Box 1172 Blindern, 0318 Oslo, Norway	k.h.larsson@nhm.uio.no
54	Steven	Leavitt	36	Science and Education, The Field Museum, 1400 S. Lake Shore Drive, Chicago, IL 60605, USA	sleavitt@fieldmuseum.org
55	Peter M.	Letcher	40	Department of Biological Sciences, The University of Alabama, Tuscaloosa, AL 35487, USA	letch006@as.ua.edu
56	Kare	Liimatainen	41	Plant Biology, Department of Biosciences, P.O. Box 65, 00014 University of Helsinki, Finland	Kare.Liimatainen@helsinki.fi
57	Jian-Kui	Liu	11	Institute of Excellence in Fungal Research, and School of Science, Mae Fah Luang University, Chiang Rai 57100, Thailand	ljiankui@gmail.com
58	D. Jean	Lodge	42	USDA Forest Service, NRS, PO Box 1377, Luquillo, Puerto Rico	djlodge@caribe.net
59	Janet Jennifer	Luangsa-ard	43	National Center for Genetic Engineering and Biotechnology (BIOTEC),113 Paholyothin Road, Pathum Thani 12120 Thailand	jajen@biotec.or.th
60	H. Thorsten	Lumbsch	36	Science and Education, The Field Museum, 1400 S. Lake Shore Drive, Chicago, IL 60605, USA	tlumbsch@fieldmuseum.org
61	Sajeewa S.N.	Maharachchikumbura	11	Institute of Excellence in Fungal Research, and School of Science, Mae Fah Luang University, Chiang Rai 57100, Thailand	sajeewa83@yahoo.com
62	Dimuthu	Manamgoda	11	Institute of Excellence in Fungal Research, and School of Science, Mae Fah Luang University, Chiang Rai 57100, Thailand	dsmanamgoda@gmail.com
63	María P.	Martín	19	Real Jardín Botánico, RJB-CSIC, Plaza de Murillo 2, 28014 Madrid, Spain	maripaz@rjb.csic.es
64	Andrew	Minnis	44	Department of Medical Microbiology and Immunology, 1550 Linden Drive, Madison, WI, USA	minnis@wisc.edu
65	Jean-Marc	Moncalvo	45	Department of Natural History, Royal Ontario Museum, and Department of Ecology & Evolutionary Biology, University of Toronto, Toronto, Ontario, Canada	jeanmarcm@gmail.com
66	Giuseppina	Mulè	46	Institute of Sciences of Food Production, National Research Council (CNR), Via Amendola 122/O, Bari, Italy	giuseppina.mule@ispa.cnr.it
67	Karen K	Nakasone	47	Center for Forest Mycology Research, Northern Research Station, U.S. Forest Service, One Gifford Pinchot Drive, Madison, Wisconsin 53726-2398, USA	knakasone@fs.fed.us
68	Tuula	Niskanen	41	Plant Biology, Department of Biosciences, P.O. Box 65, 00014 University of Helsinki, Finland	tuula.niskanen@cortinarius.fi
69	Ibai	Olariaga	30	Department of Botany, Swedish Museum of Natural History, P.O. Box 50007, SE-104 05, Stockholm, Sweden	ibai.olariaga@nrm.se
70	Tamás	Papp	37	University of Szeged, Faculty of Science and Informatics, Department of Microbiology, Kozep fasor 52, Szeged, H-6726, Hungary	pappt71@gmail.com
71	Tamás	Petkovits	37	University of Szeged, Faculty of Science and Informatics, Department of Microbiology, Kozep fasor 52, Szeged, H-6726, Hungary	pettam@gmail.com
72	Raquel	Pino-Bodas	48	Botanical Museum, Finnish Museum of Natural History, FI-00014 University of Helsinki, Finland
73	Martha J.	Powell	40	Department of Biological Sciences, The University of Alabama, Tuscaloosa, AL 35487, USA	mpowell@biology.as.ua.edu
74	Huzefa A.	Raja	49	The University of North Carolina at Greensboro, Department of Chemistry and Biochemistry, 457 Sullivan Science Building, P.O. Box 26170, Greensboro, NC 27402-6170, USA	huzefaraja@gmail.com
75	Dirk	Redecker	50	UMR 1347 Agroécologie INRA/Université de Bourgogne/AgroSup, Dijon, France	dirk.redecker@dijon.inra.fr
76	J.M.	Sarmiento-Ramirez	19	Real Jardín Botánico, RJB-CSIC, Plaza de Murillo 2, 28014 Madrid, Spain
77	Keith A.	Seifert	28	Biodiversity (Mycology and Microbiology) Agriculture and Agri-Food Canada , 960 Carling Avenue, Ottawa, Ontario, Canada	Keith.Seifert@agr.gc.ca
78	Bhushan	Shrestha	51	Institute of Life Science and Biotechnology, Sungkyunkwan University, Cheoncheon-Dong, Jangan-Gu,Suwon 440-746, Korea	bhushan.shrestha@gmail.com
79	Soili	Stenroos	48	Botanical Museum, Finnish Museum of Natural History, FI-00014 University of Helsinki, Finland	soili.stenroos@helsinki.fi
80	Benjamin	Stielow	2	CBS-KNAW Fungal Biodiversity Centre, P.O. Box 85167, 3508 AD Utrecht, The Netherlands	b.stielow@cbs.knaw.nl
81	Sung-Oui	Suh	52	Mycology and Botany Program, American Type Culture Collection (ATCC), 10801 University Blvd., Manassas, VA 20110, USA	ssuh@atcc.org
82	Kazuaki	Tanaka	53	Faculty of Agriculture and Life Science, Hirosaki University, 3 Bunkyo-cho, Hirosaki, Aomori 036-8561, Japan	k-tanaka@cc.hirosaki-u.ac.jp
83	Leho	Tedersoo	9	Natural History Museum, University of Tartu, 46 Vanemuise, 51014 Tartu, Estonia	leho.tedersoo@ut.ee
84	M. Teresa	Telleria	19	Real Jardín Botánico, RJB-CSIC, Plaza de Murillo 2, 28014 Madrid, Spain
85	Dhanushka	Udayanga	11	Institute of Excellence in Fungal Research, and School of Science, Mae Fah Luang University, Chiang Rai 57100, Thailand	udayasun55@yahoo.com
86	Wendy A.	Untereiner	54	Department of Biology, Brandon University, Brandon, Manitoba, Canada	untereiner@brandonu.ca
87	Javier Diéguez	Uribeondo	19	Real Jardín Botánico, RJB-CSIC, Plaza de Murillo 2, 28014 Madrid, Spain	dieguez@rjb.csic.es
88	Krishna	V. Subbarao	33	University of California, Davis Department of Plant Pathology Davis, CA, 95616, USA	kvsubbarao@ucdavis.edu
89	Csaba	Vágvölgyi	37	University of Szeged, Faculty of Science and Informatics, Department of Microbiology, Kozep fasor 52, Szeged, H-6726, Hungary	mucor1959@gmail.com
90	Cobus	Visagie	2	CBS-KNAW Fungal Biodiversity Centre, P.O. Box 85167, 3508 AD Utrecht, The Netherlands	c.visagie@cbs.knaw.nl
91	Kerstin	Voigt	55	Jena Microbial Resource Collection, Leibniz Institute for Natural Product Research and Infection Biology and University of Jena, Jena, Germany.	Kerstin.Voigt@hki-jena.de
92	Donald M.	Walker	56	Department of Natural Sciences, The University of Findlay, Findlay, OH 45840, USA	walkerd@findlay.edu
93	Bevan S.	Weir	34	Landcare Research, Private Bag 92170, Auckland 1142, New Zealand	WeirB@landcareresearch.co.nz
94	Michael	Weiß	57	Institute of Evolution and Ecology, University of Tübingen, Auf der Morgenstelle 1, D-72076 Tübingen, Germany	michael.weiss@uni-tuebingen.de
95	Zhuang	Wen-Ying	58	Mushroom Research Division, National Institute of Horticultural and Herbal Science, Rural Development Administration, Suwon 441-707, Korea	zhuangwy@im.ac.cn
96	Nalin N.	Wijayawardene	11	Institute of Excellence in Fungal Research, and School of Science, Mae Fah Luang University, Chiang Rai 57100, Thailand	nalinwijayawardene@yahoo.com
97	Michael J.	Wingfield	17	Department of Microbiology and Plant Pathology, Forestry & Agricultural Biotechnology Institute (FABI), University of Pretoria, Pretoria, 0001, South Africa	Mike.Wingfield@up.ac.za
98	J. P.	Xu	59	Department of Biology, McMaster University, Hamilton, Ontario, L8S 4K1, Canada	jpxu@mcmaster.ca
99	Zhu L.	Yang	14	Kunming Institute of Botany, Chinese Academy of Sciences, Kunming 650201, Yunnan, P. R. China	fungiamanita@gmail.com
100	Ning	Zhang	60	Department of Plant Biology and Pathology, Rutgers University, New Brunswick, NJ 08901, USA	zhang@AESOP.Rutgers.edu
101	Scott	Federhen	1	National Center for Biotechnology Information, National Library of Medicine, National Institutes of Health, Bethesda, Maryland, USA	federhen@ncbi.nlm.nih.gov
