# Supplementary material for: Finding needles in haystacks: linking scientific names, reference specimens and molecular data for Fungi
Source: Oxford University Press journal article supplement (doi:10.1093/database/bau061), 2014-06-30
Supplement: bau061_Supplementary_Data.zip [file bau061_Supplementary_Data.zip › Data_Accessions.xlsx]

## Sheet: Sheet1
tracking no	verified by	Correct, currently accepted species name	ITSx annotation	CATTA motif in first 40 bases?	GenBank lineage	GenBank taxname	GBTaxID	ITS accession	RefSeq accession	culture collection	isolate/strain	clone	specimen voucher	type status	nonATGCbase count
1		Kabatiella bupleuri	only 5.8S_ITS2 complete, ITS1 partial	Yes	Eukaryota; Fungi; Dikarya; Ascomycota; Pezizomycotina; Dothideomycetes; Dothideomycetidae; Dothideales; Dothioraceae; mitosporic Dothioraceae; Kabatiella	Kabatiella bupleuri	1217678	JN886792		CBS:131304	F278240			ex-holotype culture of Kabatiella bupleuri
2		Xylona heveae	only 5.8S_ITS2 complete, ITS1 partial		Eukaryota; Fungi; Dikarya; Ascomycota; Pezizomycotina; Xylonomycetes; Xylonomycetales; Xylonomycetaceae; Xylona	Xylona heveae	1217826	JQ838232		CBS:132557	TC161		BPI:884084	ex-holotype culture of Xylona heveae
3	UBC / Nicolas Feau	Tuber cistophilum	only ITS1_5.8S complete, ITS2 partial		Eukaryota; Fungi; Dikarya; Ascomycota; Pezizomycotina; Pezizomycetes; Pezizales; Tuberaceae; Tuber	Tuber cistophilum	1131760	JN392231					AH:39275	holotype of Tuber cistophilum
4	Andrew Miller	Acanthostigma multiseptatum	complete ITS1_5.8S_ITS2	Yes	Eukaryota; Fungi; Dikarya; Ascomycota; Pezizomycotina; Dothideomycetes; Dothideomycetes incertae sedis; Tubeufiaceae; Acanthostigma	Acanthostigma multiseptatum	796413	GQ856145			ANM 475		ILLS:59354	holotype of Acanthostigma multiseptatum
5	Andrew Miller	Acanthostigma septoconstrictum	complete ITS1_5.8S_ITS2	Yes	Eukaryota; Fungi; Dikarya; Ascomycota; Pezizomycotina; Dothideomycetes; Dothideomycetes incertae sedis; Tubeufiaceae; Acanthostigma	Acanthostigma septoconstrictum	796411	GQ856143			ANM 536.1		ILLS:59356	holotype of Acanthostigma septoconstrictum
7	Andrew Miller	Coniochaeta gigantospora	complete ITS1_5.8S_ITS2		Eukaryota; Fungi; Dikarya; Ascomycota; Pezizomycotina; Sordariomycetes; Sordariomycetidae; Coniochaetales; Coniochaetaceae; Coniochaeta	Coniochaeta gigantospora	1155185	JN684909					ILLS:60816	type of Coniochaeta gigantospora
8	Andrew Miller	Lasiosphaeria rugulosa	complete ITS1_5.8S_ITS2		Eukaryota; Fungi; Dikarya; Ascomycota; Pezizomycotina; Sordariomycetes; Sordariomycetidae; Sordariales; Lasiosphaeriaceae; Lasiosphaeria	Lasiosphaeria rugulosa	260667	AY587933		ATCC:MYA-2578	SMH1518			ex-holotype culture of Lasiosphaeria rugulosa
10	Andrew Miller	Aquapoterium pinicola	complete ITS1_5.8S_ITS2	Yes	Eukaryota; Fungi; Dikarya; Ascomycota; Pezizomycotina; Leotiomycetes; Helotiales; Helotiales incertae sedis; Aquapoterium	Aquapoterium pinicola	483894	FJ172275	NR_111345	ATCC:MYA-4213	ATCC MYA-4213			ex-type culture of Aquapoterium pinicola
11	Conrad Schoch	Hysterium pulicare	complete ITS1_5.8S_ITS2		Eukaryota; Fungi; Dikarya; Ascomycota; Pezizomycotina; Dothideomycetes; Pleosporomycetidae; Hysteriales; Hysteriaceae; Hysterium	Hysterium pulicare	100027	EU552137		CBS:119331				verified
12	Andrew Miller	Chaetosphaeria metallicans	complete ITS1_5.8S_ITS2	Yes	Eukaryota; Fungi; Dikarya; Ascomycota; Pezizomycotina; Sordariomycetes; Sordariomycetidae; Chaetosphaeriales; Chaetosphaeriaceae; Chaetosphaeria	Chaetosphaeria metallicans	475849	EU037893					PDD:92539	holotype of Chaetosphaeria metallicans
13	Andrew Miller	Chaetosphaeria bombycina	complete ITS1_5.8S_ITS2	Yes	Eukaryota; Fungi; Dikarya; Ascomycota; Pezizomycotina; Sordariomycetes; Sordariomycetidae; Chaetosphaeriales; Chaetosphaeriaceae; Chaetosphaeria	Chaetosphaeria bombycina	475848	EU037892					PDD:92538	holotype of Chaetosphaeria bombycina	1
14	Andrew Miller	Chaetosphaeria albida	complete ITS1_5.8S_ITS2	Yes	Eukaryota; Fungi; Dikarya; Ascomycota; Pezizomycotina; Sordariomycetes; Sordariomycetidae; Chaetosphaeriales; Chaetosphaeriaceae; Chaetosphaeria	Chaetosphaeria albida	475847	EU037890					PDD:92537	holotype of Chaetosphaeria albida
15	Peter Johnston	Chlorociboria campbellensis	only 5.8S complete, ITS1&2 partial	Yes	Eukaryota; Fungi; Dikarya; Ascomycota; Pezizomycotina; Leotiomycetes; Helotiales; Helotiaceae; Chlorociboria	Chlorociboria campbellensis	296805	AY755357			PRJ CAM71.1		PDD:74019	holotype of Chlorociboria campbellensis
16	Peter Johnston	Chlorociboria aeruginascens subsp. australis	only 5.8S complete, ITS1&2 partial	Yes	Eukaryota; Fungi; Dikarya; Ascomycota; Pezizomycotina; Leotiomycetes; Helotiales; Helotiaceae; Chlorociboria	Chlorociboria aeruginascens subsp. australis	319375	AY755351		ICMP:15642	PRJ D1609		PDD:74101	holotype of Chlorociboria aeruginascens subsp. australis
17	Peter Johnston	Chlorociboria spiralis	only 5.8S complete, ITS1&2 partial	Yes	Eukaryota; Fungi; Dikarya; Ascomycota; Pezizomycotina; Leotiomycetes; Helotiales; Helotiaceae; Chlorociboria	Chlorociboria spiralis	296796	AY755348			PRJ D1762		PDD:77771	holotype of Chlorociboria spiralis
18	Peter Johnston	Chlorociboria macrospora	only 5.8S complete, ITS1&2 partial	Yes	Eukaryota; Fungi; Dikarya; Ascomycota; Pezizomycotina; Leotiomycetes; Helotiales; Helotiaceae; Chlorociboria	Chlorociboria macrospora	296791	AY755343			PRJ D1641		PDD:73994	holotype of Chlorociboria macrospora
19	Peter Johnston	Chlorociboria duriligna	only 5.8S complete, ITS1&2 partial	Yes	Eukaryota; Fungi; Dikarya; Ascomycota; Pezizomycotina; Leotiomycetes; Helotiales; Helotiaceae; Chlorociboria	Chlorociboria duriligna	296789	AY755341			PRJ D1812		PDD:81278	holotype of Chlorociboria duriligna
21	Peter Johnston	Lophodermium gamundiae	complete ITS1_5.8S_ITS2	Yes	Eukaryota; Fungi; Dikarya; Ascomycota; Pezizomycotina; Leotiomycetes; Rhytismatales; Rhytismataceae; Lophodermium	Lophodermium gamundiae	420280	EF191238		ICMP:16802	SA176		PDD:89040	ex-isotype culture of Lophodermium gamundiae
22	Peter Johnston	Strattonia oblecythiformis	complete ITS1_5.8S_ITS2	Yes	Eukaryota; Fungi; Dikarya; Ascomycota; Pezizomycotina; Sordariomycetes; Sordariomycetidae; Sordariales; Lasiosphaeriaceae; Strattonia	Strattonia oblecythiformis	343507	DQ166959		ICMP:14703;CBS:110350	A415b;ICMP 14703;CBS 110350		PDD:75154	holotype of Strattonia oblecythiformis
23	Peter Johnston	Podospora fabiformis	complete ITS1_5.8S_ITS2	Yes	Eukaryota; Fungi; Dikarya; Ascomycota; Pezizomycotina; Sordariomycetes; Sordariomycetidae; Sordariales; Lasiosphaeriaceae; Podospora	Podospora fabiformis	343502	DQ166958		CBS:112043	A204d;CBS 112043		PDD:76455	holotype of Podospora fabiformis
24	Peter Johnston	Podospora dimorpha	complete ITS1_5.8S_ITS2	Yes	Eukaryota; Fungi; Dikarya; Ascomycota; Pezizomycotina; Sordariomycetes; Sordariomycetidae; Sordariales; Lasiosphaeriaceae; Podospora	Podospora dimorpha	343506	DQ166963		CBS:115806	A522;CBS 115806		PDD:80310	holotype of Podospora dimorpha
26	Peter Johnston	Entorrhiza citriformis	complete ITS1_5.8S_ITS2		Eukaryota; Fungi; Dikarya; Basidiomycota; Basidiomycota incertae sedis; Entorrhizomycetes; Entorrhizales; Entorrhizaceae; Entorrhiza	Entorrhiza citriformis	390835	DQ645527			AFTOL-ID 1873		PDD:70949	holotype of Entorrhiza citriformis
27	Peter Johnston	Cortinarius austrocyanites	complete ITS1_5.8S_ITS2		Eukaryota; Fungi; Dikarya; Basidiomycota; Agaricomycotina; Agaricomycetes; Agaricomycetidae; Agaricales; Cortinariaceae; Cortinarius	Cortinarius austrocyanites	304792	AY669626					PDD:70498	holotype of Cortinarius austrocyanites	1
28	Peter Johnston	Cortinarius cretax	complete ITS1_5.8S_ITS2		Eukaryota; Fungi; Dikarya; Basidiomycota; Agaricomycotina; Agaricomycetes; Agaricomycetidae; Agaricales; Cortinariaceae; Cortinarius	Cortinarius cretax	304787	AY669622					PDD:73148	holotype of Cortinarius cretax
29	Peter Johnston	Rosenscheldiella korthalsellae	complete ITS1_5.8S_ITS2		Eukaryota; Fungi; Dikarya; Ascomycota; Pezizomycotina; Dothideomycetes; Dothideomycetidae; Capnodiales; Mycosphaerellaceae; Rosenscheldiella	Rosenscheldiella korthalsellae	664886	GQ355332					PDD:94885	holotype of Rosenscheldiella korthalsellae
30	Peter Johnston	Cortinarius viscilaetus	complete ITS1_5.8S_ITS2		Eukaryota; Fungi; Dikarya; Basidiomycota; Agaricomycotina; Agaricomycetes; Agaricomycetidae; Agaricales; Cortinariaceae; Cortinarius	Cortinarius viscilaetus	702282	GU233353					PDD:71010	holotype of Cortinarius viscilaetus
31	Peter Johnston	Cortinarius rattinus	complete ITS1_5.8S_ITS2		Eukaryota; Fungi; Dikarya; Basidiomycota; Agaricomycotina; Agaricomycetes; Agaricomycetidae; Agaricales; Cortinariaceae; Cortinarius	Cortinarius rattinus	702280	GU233352					PDD:71009	holotype of Cortinarius rattinus
32	Peter Johnston	Cortinarius periclymenus	complete ITS1_5.8S_ITS2		Eukaryota; Fungi; Dikarya; Basidiomycota; Agaricomycotina; Agaricomycetes; Agaricomycetidae; Agaricales; Cortinariaceae; Cortinarius	Cortinarius periclymenus	702275	GU233351					PDD:71008	holotype of Cortinarius periclymenus	1
33	Peter Johnston	Cortinarius anauensis	complete ITS1_5.8S_ITS2		Eukaryota; Fungi; Dikarya; Basidiomycota; Agaricomycotina; Agaricomycetes; Agaricomycetidae; Agaricales; Cortinariaceae; Cortinarius	Cortinarius anauensis	702129	GU233350					PDD:71007	holotype of Cortinarius anauensis
34	Peter Johnston	Cortinarius minoscaurus	complete ITS1_5.8S_ITS2		Eukaryota; Fungi; Dikarya; Basidiomycota; Agaricomycotina; Agaricomycetes; Agaricomycetidae; Agaricales; Cortinariaceae; Cortinarius	Cortinarius minoscaurus	304793	GU233349					PDD:71005	holotype of Cortinarius minoscaurus	3
35	Peter Johnston	Cortinarius caryotis	complete ITS1_5.8S_ITS2		Eukaryota; Fungi; Dikarya; Basidiomycota; Agaricomycotina; Agaricomycetes; Agaricomycetidae; Agaricales; Cortinariaceae; Cortinarius	Cortinarius caryotis	702131	GU233348					PDD:71004	holotype of Cortinarius caryotis	1
36	Peter Johnston	Cortinarius papaver	complete ITS1_5.8S_ITS2		Eukaryota; Fungi; Dikarya; Basidiomycota; Agaricomycotina; Agaricomycetes; Agaricomycetidae; Agaricales; Cortinariaceae; Cortinarius	Cortinarius papaver	702272	GU233347					PDD:71003	holotype of Cortinarius papaver
37	Peter Johnston	Cortinarius collybianus	complete ITS1_5.8S_ITS2		Eukaryota; Fungi; Dikarya; Basidiomycota; Agaricomycotina; Agaricomycetes; Agaricomycetidae; Agaricales; Cortinariaceae; Cortinarius	Cortinarius collybianus	700571	GU233346					PDD:70509	holotype of Cortinarius collybianus
38	Peter Johnston	Cortinarius persicanus	complete ITS1_5.8S_ITS2		Eukaryota; Fungi; Dikarya; Basidiomycota; Agaricomycotina; Agaricomycetes; Agaricomycetidae; Agaricales; Cortinariaceae; Cortinarius	Cortinarius persicanus	304796	GU233345					PDD:70507	holotype of Cortinarius persicanus
39	Peter Johnston	Cortinarius naphthalinus	complete ITS1_5.8S_ITS2		Eukaryota; Fungi; Dikarya; Basidiomycota; Agaricomycotina; Agaricomycetes; Agaricomycetidae; Agaricales; Cortinariaceae; Cortinarius	Cortinarius naphthalinus	702271	GU233344					PDD:70505	holotype of Cortinarius naphthalinus
40	Peter Johnston	Cortinarius carbonellus	complete ITS1_5.8S_ITS2		Eukaryota; Fungi; Dikarya; Basidiomycota; Agaricomycotina; Agaricomycetes; Agaricomycetidae; Agaricales; Cortinariaceae; Cortinarius	Cortinarius carbonellus	702130	GU233343					PDD:70502	holotype of Cortinarius carbonellus
41	Peter Johnston	Cortinarius picoides	complete ITS1_5.8S_ITS2		Eukaryota; Fungi; Dikarya; Basidiomycota; Agaricomycotina; Agaricomycetes; Agaricomycetidae; Agaricales; Cortinariaceae; Cortinarius	Cortinarius picoides	702278	GU233342					PDD:70501	holotype of Cortinarius picoides
42	Peter Johnston	Cortinarius perelegans	complete ITS1_5.8S_ITS2		Eukaryota; Fungi; Dikarya; Basidiomycota; Agaricomycotina; Agaricomycetes; Agaricomycetidae; Agaricales; Cortinariaceae; Cortinarius	Cortinarius perelegans	702274	GU233341					PDD:70500	holotype of Cortinarius perelegans
43	Peter Johnston	Cortinarius dysodes	complete ITS1_5.8S_ITS2		Eukaryota; Fungi; Dikarya; Basidiomycota; Agaricomycotina; Agaricomycetes; Agaricomycetidae; Agaricales; Cortinariaceae; Cortinarius	Cortinarius dysodes	702134	GU233340					PDD:70499	holotype of Cortinarius dysodes
44	Peter Johnston	Cortinarius chrysma	complete ITS1_5.8S_ITS2		Eukaryota; Fungi; Dikarya; Basidiomycota; Agaricomycotina; Agaricomycetes; Agaricomycetidae; Agaricales; Cortinariaceae; Cortinarius	Cortinarius chrysma	702133	GU233339					PDD:68469	holotype of Cortinarius chrysma
45	Peter Johnston	Cortinarius exlugubris	complete ITS1_5.8S_ITS2		Eukaryota; Fungi; Dikarya; Basidiomycota; Agaricomycotina; Agaricomycetes; Agaricomycetidae; Agaricales; Cortinariaceae; Cortinarius	Cortinarius exlugubris	702135	GU233338					PDD:67181	holotype of Cortinarius exlugubris
46	Peter Johnston	Cortinarius saturniorum	complete ITS1_5.8S_ITS2		Eukaryota; Fungi; Dikarya; Basidiomycota; Agaricomycotina; Agaricomycetes; Agaricomycetidae; Agaricales; Cortinariaceae; Cortinarius	Cortinarius saturniorum	702281	GU233337					PDD:67176	holotype of Cortinarius saturniorum
47	Peter Johnston	Cortinarius viscostriatus	complete ITS1_5.8S_ITS2		Eukaryota; Fungi; Dikarya; Basidiomycota; Agaricomycotina; Agaricomycetes; Agaricomycetidae; Agaricales; Cortinariaceae; Cortinarius	Cortinarius viscostriatus	702283	GU233335					PDD:27272	holotype of Cortinarius viscostriatus
48	Peter Johnston	Cortinarius vitreopileatus	complete ITS1_5.8S_ITS2		Eukaryota; Fungi; Dikarya; Basidiomycota; Agaricomycotina; Agaricomycetes; Agaricomycetidae; Agaricales; Cortinariaceae; Cortinarius	Cortinarius vitreopileatus	702284	GU233334					PDD:27271	holotype of Cortinarius vitreopileatus	1
49	Peter Johnston	Cortinarius aegrotus	complete ITS1_5.8S_ITS2		Eukaryota; Fungi; Dikarya; Basidiomycota; Agaricomycotina; Agaricomycetes; Agaricomycetidae; Agaricales; Cortinariaceae; Cortinarius	Cortinarius aegrotus	702127	GU233333					PDD:27270	holotype of Cortinarius aegrotus
50	Peter Johnston	Cortinarius castaneiceps	only ITS1_5.8S complete, ITS2 partial		Eukaryota; Fungi; Dikarya; Basidiomycota; Agaricomycotina; Agaricomycetes; Agaricomycetidae; Agaricales; Cortinariaceae; Cortinarius	Cortinarius castaneiceps	702132	GU233332					PDD:27269	holotype of Cortinarius castaneiceps
51	Peter Johnston	Cortinarius porphyrophaeus	only ITS1_5.8S complete, ITS2 partial		Eukaryota; Fungi; Dikarya; Basidiomycota; Agaricomycotina; Agaricomycetes; Agaricomycetidae; Agaricales; Cortinariaceae; Cortinarius	Cortinarius porphyrophaeus	702279	GU233331					PDD:27263	holotype of Cortinarius porphyrophaeus
52	Peter Johnston	Cortinarius marmoratus	only 5.8S complete, ITS1&2 partial		Eukaryota; Fungi; Dikarya; Basidiomycota; Agaricomycotina; Agaricomycetes; Agaricomycetidae; Agaricales; Cortinariaceae; Cortinarius	Cortinarius marmoratus	702136	GU233330					PDD:27262	holotype of Cortinarius marmoratus
53	Peter Johnston	Cortinarius aerugineoconicus	complete ITS1_5.8S_ITS2		Eukaryota; Fungi; Dikarya; Basidiomycota; Agaricomycotina; Agaricomycetes; Agaricomycetidae; Agaricales; Cortinariaceae; Cortinarius	Cortinarius aerugineoconicus	702128	GU233329					PDD:27258	holotype of Cortinarius aerugineoconicus
54	Peter Johnston	Camarophyllus griseorufescens	complete ITS1_5.8S_ITS2		Eukaryota; Fungi; Dikarya; Basidiomycota; Agaricomycotina; Agaricomycetes; Agaricomycetidae; Agaricales; Tricholomataceae; Camarophyllus	Camarophyllus griseorufescens	702125	GU233328					PDD:27230	holotype of Camarophyllus griseorufescens
55	Peter Johnston	Camarophyllus impurus	complete ITS1_5.8S_ITS2		Eukaryota; Fungi; Dikarya; Basidiomycota; Agaricomycotina; Agaricomycetes; Agaricomycetidae; Agaricales; Tricholomataceae; Camarophyllus	Camarophyllus impurus	702126	GU233327					PDD:27226	holotype of Camarophyllus impurus
56	Peter Johnston	Dermocybe icterinoides	only ITS1_5.8S complete, ITS2 partial		Eukaryota; Fungi; Dikarya; Basidiomycota; Agaricomycotina; Agaricomycetes; Agaricomycetidae; Agaricales; Cortinariaceae	Dermocybe icterinoides	702292	GU233326					PDD:27184	holotype of Dermocybe icterinoides	1
57	Peter Johnston	Dermocybe leptospermorum	complete ITS1_5.8S_ITS2	Yes	Eukaryota; Fungi; Dikarya; Basidiomycota; Agaricomycotina; Agaricomycetes; Agaricomycetidae; Agaricales; Cortinariaceae	Dermocybe leptospermorum	702294	GU233325					PDD:27183	holotype of Dermocybe leptospermorum	1
58	Peter Johnston	Dermocybe largofulgens	complete ITS1_5.8S_ITS2		Eukaryota; Fungi; Dikarya; Basidiomycota; Agaricomycotina; Agaricomycetes; Agaricomycetidae; Agaricales; Cortinariaceae	Dermocybe largofulgens	702293	GU233324					PDD:27181	holotype of Dermocybe largofulgens	1
59	Peter Johnston	Dermocybe alienata	complete ITS1_5.8S_ITS2		Eukaryota; Fungi; Dikarya; Basidiomycota; Agaricomycotina; Agaricomycetes; Agaricomycetidae; Agaricales; Cortinariaceae	Dermocybe alienata	700570	GU233323					PDD:27180	holotype of Dermocybe alienata	2
60	Peter Johnston	Dermocybe egmontiana	only ITS1_5.8S complete, ITS2 partial		Eukaryota; Fungi; Dikarya; Basidiomycota; Agaricomycotina; Agaricomycetes; Agaricomycetidae; Agaricales; Cortinariaceae	Dermocybe egmontiana	702291	GU233322					PDD:27177	holotype of Dermocybe egmontiana	1
61	Peter Johnston	Dermocybe cardinalis	complete ITS1_5.8S_ITS2		Eukaryota; Fungi; Dikarya; Basidiomycota; Agaricomycotina; Agaricomycetes; Agaricomycetidae; Agaricales; Cortinariaceae	Dermocybe cardinalis	183877	GU233321					PDD:27174	holotype of Dermocybe cardinalis
62	Peter Johnston	Dermocybe cramesina	complete ITS1_5.8S_ITS2		Eukaryota; Fungi; Dikarya; Basidiomycota; Agaricomycotina; Agaricomycetes; Agaricomycetidae; Agaricales; Cortinariaceae	Dermocybe cramesina	702290	GU233320					PDD:27173	holotype of Dermocybe cramesina
63	Peter Johnston	Dermocybe splendida	complete ITS1_5.8S_ITS2		Eukaryota; Fungi; Dikarya; Basidiomycota; Agaricomycotina; Agaricomycetes; Agaricomycetidae; Agaricales; Cortinariaceae; Dermocybe	Dermocybe splendida	742022	GU233319					PDD:27168	holotype of Dermocybe splendida
64	Peter Johnston	Inocybe viscata	complete ITS1_5.8S_ITS2		Eukaryota; Fungi; Dikarya; Basidiomycota; Agaricomycotina; Agaricomycetes; Agaricomycetidae; Agaricales; Inocybaceae; Inocybe	Inocybe viscata	702124	GU233318					PDD:27109	holotype of Astrosporina viscata
65	Cecile Gueidan	Anzia mahaeliyensis	complete ITS1_5.8S_ITS2		Eukaryota; Fungi; Dikarya; Ascomycota; Pezizomycotina; Lecanoromycetes; Lecanoromycetidae; Lecanorales; Lecanorineae; Parmeliaceae; Anzia	Anzia mahaeliyensis	1125961	JN873339					BM:1088237	holotype of Anzia mahaeliyensis
66	Cecile Gueidan	Anzia flavotenuis	complete ITS1_5.8S_ITS2		Eukaryota; Fungi; Dikarya; Ascomycota; Pezizomycotina; Lecanoromycetes; Lecanoromycetidae; Lecanorales; Lecanorineae; Parmeliaceae; Anzia	Anzia flavotenuis	1125960	JN873338					BM:1088238	holotype of Anzia flavotenuis
67	Conrad Schoch	Stagonosporopsis actaeae	only 5.8S_ITS2 complete, ITS1 partial	Yes	Eukaryota; Fungi; Dikarya; Ascomycota; Pezizomycotina; Dothideomycetes; Pleosporomycetidae; Pleosporales; Pleosporineae; Didymellaceae; Stagonosporopsis	Stagonosporopsis actaeae	749881	GU237734		CBS:106.96	CBS 106.96			verified
68		Stagonosporopsis crystalliniformis	only 5.8S_ITS2 complete, ITS1 partial	Yes	Eukaryota; Fungi; Dikarya; Ascomycota; Pezizomycotina; Dothideomycetes; Pleosporomycetidae; Pleosporales; Pleosporineae; Didymellaceae; Stagonosporopsis	Stagonosporopsis crystalliniformis	749888	GU237903		CBS:713.85	CBS 713.85		CBS:H-3926	ex-holotype culture of Phoma andina var. crystalliniformis
69		Stagonosporopsis oculi-hominis	only 5.8S_ITS2 complete, ITS1 partial	Yes	Eukaryota; Fungi; Dikarya; Ascomycota; Pezizomycotina; Dothideomycetes; Pleosporomycetidae; Pleosporales; Pleosporineae; Didymellaceae; Stagonosporopsis	Stagonosporopsis oculi-hominis	1415907	GU237901	NR_111461	CBS:634.92	CBS 634.92			ex-type culture of Phoma oculi-hominis
70	Ewald Groenewald	Stagonosporopsis tanaceti	only 5.8S_ITS2 complete, ITS1 partial	Yes	Eukaryota; Fungi; Dikarya; Ascomycota; Pezizomycotina; Dothideomycetes; Pleosporomycetidae; Pleosporales; Pleosporineae; Didymellaceae; Stagonosporopsis	Stagonosporopsis tanaceti	1200839	JQ897481	NR_111724	CBS:131484	CBS 131484			ex-holotype culture of Stagonosporopsis tanaceti
72	AFTOL	Endogone lactiflua	only 5.8S complete, ITS1&2 partial		Eukaryota; Fungi; Fungi incertae sedis; Early diverging fungal lineages; Mucoromycotina; Endogonales; Endogonaceae; Endogone	Endogone lactiflua	324621	AY997045			AFTOL-ID 45		OSC:80932	verified
74	Conrad Schoch	Zoophthora radicans	only 5.8S_ITS2 complete, ITS1 partial		Eukaryota; Fungi; Entomophthoromycota; Entomophthoromycetes; Entomophthorales; Entomophthoraceae; Zoophthora	Zoophthora radicans	42210	EF137934		ARSEF:6003	ARSEF 6003			verified
76	Conrad Schoch	Basidiobolus meristosporus	complete ITS1_5.8S_ITS2	Yes	Eukaryota; Fungi; Entomophthoromycota; Basidiobolomycetes; Basidiobolales; Basidiobolaceae; Basidiobolus	Basidiobolus meristosporus	423460	EF392533		ATCC:14450	ATCC 14450			verified
77	AFTOL	Rhizopus stolonifer	only 5.8S complete, ITS1&2 partial		Eukaryota; Fungi; Fungi incertae sedis; Early diverging fungal lineages; Mucoromycotina; Mucorales; Mucorineae; Rhizopodaceae; Rhizopus	Rhizopus stolonifer	4846	AY997085		DAOM:225708	AFTOL-ID 632;DAOM 225708			verified
79	Conrad Schoch	Rhizopus delemar	only 5.8S complete, ITS1&2 partial		Eukaryota; Fungi; Fungi incertae sedis; Early diverging fungal lineages; Mucoromycotina; Mucorales; Mucorineae; Rhizopodaceae; Rhizopus	Rhizopus delemar	936053	HQ435097		FGSC:9543				verified
80	Conrad Schoch	Rhizopus sexualis	only 5.8S_ITS2 complete, ITS1 partial	Yes	Eukaryota; Fungi; Fungi incertae sedis; Early diverging fungal lineages; Mucoromycotina; Mucorales; Mucorineae; Rhizopodaceae; Rhizopus	Rhizopus sexualis	209164	JN943034		FSU<DEU>:2531	FSU 2531			verified
82	Conrad Schoch	Mortierella elongata	only 5.8S_ITS2 complete, ITS1 partial	CATTC	Eukaryota; Fungi; Fungi incertae sedis; Early diverging fungal lineages; Mortierellomycotina; Mortierellales; Mortierellaceae; Mortierella	Mortierella elongata	310910	HQ630337		FSU<DEU>:823	FSU 823			verified
83	Sung-Oui Suh	Trichoderma effusum	only 5.8S_ITS2 complete, ITS1 partial	Yes	Eukaryota; Fungi; Dikarya; Ascomycota; Pezizomycotina; Sordariomycetes; Hypocreomycetidae; Hypocreales; Hypocreaceae; Trichoderma	Trichoderma effusum	202913	KC171333	NR_111833	ATCC:MYA-4837	ATCC MYA-4837			ex-type culture of Trichoderma effusum
84		Trichoderma ghanense	complete ITS1_5.8S_ITS2		Eukaryota; Fungi; Dikarya; Ascomycota; Pezizomycotina; Sordariomycetes; Hypocreomycetidae; Hypocreales; Hypocreaceae; Trichoderma	Trichoderma ghanense	65468	Z69588		ATCC:208858	GJS 95-137			ex-type culture of Trichoderma ghanense
86		Trichoderma saturnisporum	complete ITS1_5.8S_ITS2		Eukaryota; Fungi; Dikarya; Ascomycota; Pezizomycotina; Sordariomycetes; Hypocreomycetidae; Hypocreales; Hypocreaceae; Trichoderma	Trichoderma saturnisporum	5549	Z48726	NR_103704	ATCC:18903;CBS:330.70	ATCC 18903;CBS 330.70			ex-type culture of Trichoderma saturnisporum
87		Trichoderma reesei	complete ITS1_5.8S_ITS2		Eukaryota; Fungi; Dikarya; Ascomycota; Pezizomycotina; Sordariomycetes; Hypocreomycetidae; Hypocreales; Hypocreaceae; Trichoderma	Trichoderma reesei	51453	Z31016		ATCC:13631;IMI:192654;DAOM:167654	ATCC 13631;IMI 192654;DAOM 167654			ex-type culture of Trichoderma reesei
88		Trichoderma pseudokoningii	complete ITS1_5.8S_ITS2		Eukaryota; Fungi; Dikarya; Ascomycota; Pezizomycotina; Sordariomycetes; Hypocreomycetidae; Hypocreales; Hypocreaceae; Trichoderma	Trichoderma pseudokoningii	317029	Z31014		DAOM:167678;CBS:408.91	DAOM 167678;CBS 408.91;NS19			ex-type culture of Trichoderma pseudokoningii
90		Hypocrea orientalis	only 5.8S_ITS2 complete, ITS1 partial		Eukaryota; Fungi; Dikarya; Ascomycota; Pezizomycotina; Sordariomycetes; Hypocreomycetidae; Hypocreales; Hypocreaceae; Hypocrea	Hypocrea orientalis	173948	EU401550	NR_111317	CBS:130428	GJS 88-81			ex-type culture of Hypocrea orientalis
91		Hypocrea novae-zelandiae	only 5.8S_ITS2 complete, ITS1 partial	Yes	Eukaryota; Fungi; Dikarya; Ascomycota; Pezizomycotina; Sordariomycetes; Hypocreomycetidae; Hypocreales; Hypocreaceae; Hypocrea	Hypocrea novae-zelandiae	173947	DQ083019	NR_111193	CBS:639.92	GJS 81-265			ex-type culture of Hypocrea novae-zelandiae
92		Trichoderma longibrachiatum	complete ITS1_5.8S_ITS2		Eukaryota; Fungi; Dikarya; Ascomycota; Pezizomycotina; Sordariomycetes; Hypocreomycetidae; Hypocreales; Hypocreaceae; Trichoderma	Trichoderma longibrachiatum	5548	Z31019		ATCC:18648;CBS:816.68	ATCC 18648;CBS 816.68			ex-type culture of Trichoderma longibrachiatum
93	Ewald Groenewald	Cladosporium acalyphae	only 5.8S_ITS2 complete, ITS1 partial	Yes	Eukaryota; Fungi; Dikarya; Ascomycota; Pezizomycotina; Dothideomycetes; Dothideomycetidae; Capnodiales; Davidiellaceae; mitosporic Davidiellaceae; Cladosporium	Cladosporium acalyphae	887083	HM147994		CPC:11625	CBS 125982		CBS:H-20422	ex-holotype culture of Cladosporium acalyphae
95	Ewald Groenewald	Cladosporium allii	complete ITS1_5.8S_ITS2		Eukaryota; Fungi; Dikarya; Ascomycota; Pezizomycotina; Dothideomycetes; Dothideomycetidae; Capnodiales; Davidiellaceae; mitosporic Davidiellaceae; Cladosporium	Cladosporium allii	1116206	JN906977		ATCC:200948	PD 80/165		CBS:H-10337	verified
96	Ewald Groenewald	Cladosporium angustisporum	complete ITS1_5.8S_ITS2	Yes	Eukaryota; Fungi; Dikarya; Ascomycota; Pezizomycotina; Dothideomycetes; Dothideomycetidae; Capnodiales; Davidiellaceae; mitosporic Davidiellaceae; Cladosporium	Cladosporium angustisporum	887084	HM147995	NR_111530	CPC:12437	CBS 125983			ex-holotype culture of Cladosporium angustisporum
97	Ewald Groenewald	Cladosporium antarcticum	only 5.8S_ITS2 complete, ITS1 partial	Yes	Eukaryota; Fungi; Dikarya; Ascomycota; Pezizomycotina; Dothideomycetes; Dothideomycetidae; Capnodiales; Davidiellaceae; mitosporic Davidiellaceae; Cladosporium	Cladosporium antarcticum	470179	EF679334		CBS:690.92				ex-holotype culture of Cladosporium antarcticum
98	Ewald Groenewald	Cladosporium aphidis	complete ITS1_5.8S_ITS2		Eukaryota; Fungi; Dikarya; Ascomycota; Pezizomycotina; Dothideomycetes; Dothideomycetidae; Capnodiales; Davidiellaceae; mitosporic Davidiellaceae; Cladosporium	Cladosporium aphidis	1116207	JN906978		CPC:13204	CPC 13204			ex-type culture of Cladosporium aphidis
99	Ewald Groenewald	Cladosporium arthropodii	complete ITS1_5.8S_ITS2		Eukaryota; Fungi; Dikarya; Ascomycota; Pezizomycotina; Dothideomycetes; Dothideomycetidae; Capnodiales; Davidiellaceae; mitosporic Davidiellaceae; Cladosporium	Cladosporium arthropodii	1116208	JN906979		CBS:124043				ex-epitype culture of Cladosporium arthropodii
100	Ewald Groenewald	Cladosporium asperulatum	complete ITS1_5.8S_ITS2		Eukaryota; Fungi; Dikarya; Ascomycota; Pezizomycotina; Dothideomycetes; Dothideomycetidae; Capnodiales; Davidiellaceae; mitosporic Davidiellaceae; Cladosporium	Cladosporium asperulatum	887085	HM147998		CPC:14040	CBS 126340			ex-holotype culture of Cladosporium asperulatum
101	Ewald Groenewald	Cladosporium australiense	complete ITS1_5.8S_ITS2		Eukaryota; Fungi; Dikarya; Ascomycota; Pezizomycotina; Dothideomycetes; Dothideomycetidae; Capnodiales; Davidiellaceae; mitosporic Davidiellaceae; Cladosporium	Cladosporium australiense	887086	HM147999		CPC:13226	CBS 125984			ex-holotype culture of Cladosporium australiense
102	Ewald Groenewald	Cladosporium basi-inflatum	only 5.8S complete, ITS1&2 partial	Yes	Eukaryota; Fungi; Dikarya; Ascomycota; Pezizomycotina; Dothideomycetes; Dothideomycetidae; Capnodiales; Davidiellaceae; mitosporic Davidiellaceae; Cladosporium	Cladosporium basi-inflatum	887087	HM148000	NR_111531	CBS:822.84	CBS 822.84			ex-holotype culture of Cladosporium basiinflatum
103	Ewald Groenewald	Cladosporium chalastosporoides	complete ITS1_5.8S_ITS2		Eukaryota; Fungi; Dikarya; Ascomycota; Pezizomycotina; Dothideomycetes; Dothideomycetidae; Capnodiales; Davidiellaceae; mitosporic Davidiellaceae; Cladosporium	Cladosporium chalastosporoides	887088	HM148001		CPC:13864	CBS 125985			ex-holotype culture of Cladosporium chalastosporioides
104	Ewald Groenewald	Cladosporium chubutense	complete ITS1_5.8S_ITS2		Eukaryota; Fungi; Dikarya; Ascomycota; Pezizomycotina; Dothideomycetes; Dothideomycetidae; Capnodiales; Davidiellaceae; mitosporic Davidiellaceae; Cladosporium	Cladosporium chubutense	643906	FJ936158		CBS:124457;CPC:13979	CBS 124457;CPC 13979			ex-holotype culture of Cladosporium chubutense
105	Ewald Groenewald	Cladosporium cladosporioides	complete ITS1_5.8S_ITS2		Eukaryota; Fungi; Dikarya; Ascomycota; Pezizomycotina; Dothideomycetes; Dothideomycetidae; Capnodiales; Davidiellaceae; mitosporic Davidiellaceae; Cladosporium	Cladosporium cladosporioides	29917	HM148003		CBS:112388	CBS 112388			ex-neotype culture of Cladosporium cladosporioides
106	Ewald Groenewald	Cladosporium colocasiae	complete ITS1_5.8S_ITS2		Eukaryota; Fungi; Dikarya; Ascomycota; Pezizomycotina; Dothideomycetes; Dothideomycetidae; Capnodiales; Davidiellaceae; mitosporic Davidiellaceae; Cladosporium	Cladosporium colocasiae	102000	HM148067		ATCC:200944	CBS 386.64			ex-holotype culture of Cladosporium colocasiae
107	Ewald Groenewald	Cladosporium colombiae	complete ITS1_5.8S_ITS2		Eukaryota; Fungi; Dikarya; Ascomycota; Pezizomycotina; Dothideomycetes; Dothideomycetidae; Capnodiales; Davidiellaceae; mitosporic Davidiellaceae; Cladosporium	Cladosporium colombiae	643907	FJ936159		CBS:274.80B	CBS 274.80B			ex-holotype culture of Cladosporium colombiae
108	Ewald Groenewald	Cladosporium cucumerinum	complete ITS1_5.8S_ITS2		Eukaryota; Fungi; Dikarya; Ascomycota; Pezizomycotina; Dothideomycetes; Dothideomycetidae; Capnodiales; Davidiellaceae; mitosporic Davidiellaceae; Cladosporium	Cladosporium cucumerinum	166633	HM148072		MUCL:10092	CBS 171.52			ex-epitype culture of Cladosporium cucumerinum
109	Ewald Groenewald	Cladosporium delicatulum	only 5.8S_ITS2 complete, ITS1 partial	Yes	Eukaryota; Fungi; Dikarya; Ascomycota; Pezizomycotina; Dothideomycetes; Dothideomycetidae; Capnodiales; Davidiellaceae; mitosporic Davidiellaceae; Cladosporium	Cladosporium delicatulum	887075	HM148081		CPC:11389	CBS 126344			verified
110	Ewald Groenewald	Cladosporium dominicanum	only 5.8S complete, ITS1&2 partial	Yes	Eukaryota; Fungi; Dikarya; Ascomycota; Pezizomycotina; Dothideomycetes; Dothideomycetidae; Capnodiales; Davidiellaceae; mitosporic Davidiellaceae; Cladosporium	Cladosporium dominicanum	1052092	DQ780353		CBS:119415;EX:F-732	EXF-732			ex-holotype culture of Cladosporium dominicanum
111	Ewald Groenewald	Cladosporium echinulatum	complete ITS1_5.8S_ITS2		Eukaryota; Fungi; Dikarya; Ascomycota; Pezizomycotina; Dothideomycetes; Dothideomycetidae; Capnodiales; Davidiellaceae; mitosporic Davidiellaceae; Cladosporium	Cladosporium echinulatum	166634	JN906980		CBS:123191				verified
112	Ewald Groenewald	Cladosporium exasperatum	complete ITS1_5.8S_ITS2		Eukaryota; Fungi; Dikarya; Ascomycota; Pezizomycotina; Dothideomycetes; Dothideomycetidae; Capnodiales; Davidiellaceae; mitosporic Davidiellaceae; Cladosporium	Cladosporium exasperatum	887089	HM148090		CPC:14638	CBS 125986			ex-holotype culture of Cladosporium exasperatum
113	Ewald Groenewald	Cladosporium exile	only 5.8S_ITS2 complete, ITS1 partial	Yes	Eukaryota; Fungi; Dikarya; Ascomycota; Pezizomycotina; Dothideomycetes; Dothideomycetidae; Capnodiales; Davidiellaceae; mitosporic Davidiellaceae; Cladosporium	Cladosporium exile	887090	HM148091	NR_111532	CPC:11828	CBS 125987			ex-holotype culture of Cladosporium exile
114	Ewald Groenewald	Cladosporium flabelliforme	complete ITS1_5.8S_ITS2		Eukaryota; Fungi; Dikarya; Ascomycota; Pezizomycotina; Dothideomycetes; Dothideomycetidae; Capnodiales; Davidiellaceae; mitosporic Davidiellaceae; Cladosporium	Cladosporium flabelliforme	887091	HM148092		CPC:14523	CBS 126345			ex-holotype culture of Cladosporium flabelliforme
115	Ewald Groenewald	Cladosporium funiculosum	complete ITS1_5.8S_ITS2		Eukaryota; Fungi; Dikarya; Ascomycota; Pezizomycotina; Dothideomycetes; Dothideomycetidae; Capnodiales; Davidiellaceae; mitosporic Davidiellaceae; Cladosporium	Cladosporium funiculosum	241845	HM148094		ATCC:38010;IFO:6537;JCM:10683;CBS:122129	CBS 122129			ex-type culture of Cladosporium funiculosum
116	Ewald Groenewald	Cladosporium fusiforme	only 5.8S complete, ITS1&2 partial	Yes	Eukaryota; Fungi; Dikarya; Ascomycota; Pezizomycotina; Dothideomycetes; Dothideomycetidae; Capnodiales; Davidiellaceae; mitosporic Davidiellaceae; Cladosporium	Cladosporium fusiforme	1052093	DQ780388		CBS:119414;EX:F-449	EXF-449			ex-holotype culture of Cladosporium fusiforme
117	Ewald Groenewald	Cladosporium gamsianum	only 5.8S_ITS2 complete, ITS1 partial	Yes	Eukaryota; Fungi; Dikarya; Ascomycota; Pezizomycotina; Dothideomycetes; Dothideomycetidae; Capnodiales; Davidiellaceae; mitosporic Davidiellaceae; Cladosporium	Cladosporium gamsianum	887092	HM148095	NR_111533	CPC:11807	CBS 125989			ex-holotype culture of Cladosporium gamsianum
118	Ewald Groenewald	Cladosporium globisporum	only 5.8S complete, ITS1&2 partial	Yes	Eukaryota; Fungi; Dikarya; Ascomycota; Pezizomycotina; Dothideomycetes; Dothideomycetidae; Capnodiales; Davidiellaceae; mitosporic Davidiellaceae; Cladosporium	Cladosporium globisporum	887093	HM148096	NR_111534	CBS:812.96	CBS 812.96			ex-holotype culture of Cladosporium globisporum
119	Ewald Groenewald	Cladosporium grevilleae	complete ITS1_5.8S_ITS2		Eukaryota; Fungi; Dikarya; Ascomycota; Pezizomycotina; Dothideomycetes; Dothideomycetidae; Capnodiales; Davidiellaceae; mitosporic Davidiellaceae; Cladosporium	Cladosporium grevilleae	1051314	JF770450		CBS:114271	CBS 114271			ex-holotype culture of Cladosporium grevilleae
120	Ewald Groenewald	Cladosporium halotolerans	only 5.8S complete, ITS1&2 partial	Yes	Eukaryota; Fungi; Dikarya; Ascomycota; Pezizomycotina; Dothideomycetes; Dothideomycetidae; Capnodiales; Davidiellaceae; mitosporic Davidiellaceae; Cladosporium	Cladosporium halotolerans	1052096	DQ780364		CBS:119416;EX:F-572	EXF-572			ex-holotype culture of Cladosporium halotolerans
121	Ewald Groenewald	Cladosporium herbaroides	only 5.8S_ITS2 complete, ITS1 partial	Yes	Eukaryota; Fungi; Dikarya; Ascomycota; Pezizomycotina; Dothideomycetes; Dothideomycetidae; Capnodiales; Davidiellaceae; mitosporic Davidiellaceae; Cladosporium	Cladosporium herbaroides	470171	EF679357		CBS:121626;CPC:12052				ex-holotype culture of Cladosporium herbaroides
122	Ewald Groenewald	Cladosporium herbarum	complete ITS1_5.8S_ITS2	Yes	Eukaryota; Fungi; Dikarya; Ascomycota; Pezizomycotina; Dothideomycetes; Dothideomycetidae; Capnodiales; Davidiellaceae; mitosporic Davidiellaceae; Cladosporium	Cladosporium herbarum	29918	EF679363		CBS:121621;CPC:12177				ex-epitype culture of Dematium herbarum
123	Ewald Groenewald	Cladosporium hillianum	complete ITS1_5.8S_ITS2		Eukaryota; Fungi; Dikarya; Ascomycota; Pezizomycotina; Dothideomycetes; Dothideomycetidae; Capnodiales; Davidiellaceae; mitosporic Davidiellaceae; Cladosporium	Cladosporium hillianum	887094	HM148097		CPC:15459	CBS 125988			ex-holotype culture of Cladosporium hillianum
124	Ewald Groenewald	Cladosporium inversicolor	only 5.8S complete, ITS1&2 partial	Yes	Eukaryota; Fungi; Dikarya; Ascomycota; Pezizomycotina; Dothideomycetes; Dothideomycetidae; Capnodiales; Davidiellaceae; mitosporic Davidiellaceae; Cladosporium	Cladosporium inversicolor	887095	HM148101	NR_111535	ATCC:200941	CBS 401.80			ex-holotype culture of Cladosporium inversicolor
125	Ewald Groenewald	Cladosporium iranicum	only 5.8S_ITS2 complete, ITS1 partial	Yes	Eukaryota; Fungi; Dikarya; Ascomycota; Pezizomycotina; Dothideomycetes; Dothideomycetidae; Capnodiales; Davidiellaceae; mitosporic Davidiellaceae; Cladosporium	Cladosporium iranicum	887096	HM148110	NR_111536	CPC:11554	CBS 126346			ex-holotype culture of Cladosporium iranicum
126	Ewald Groenewald	Cladosporium iridis	only 5.8S complete, ITS1&2 partial	Yes	Eukaryota; Fungi; Dikarya; Ascomycota; Pezizomycotina; Dothideomycetes; Dothideomycetidae; Capnodiales; Davidiellaceae; mitosporic Davidiellaceae; Cladosporium	Cladosporium iridis	161657	EF679370	NR_111271	CBS:138.40				ex-epitype culture of Scolicotrichum iridis
127	Ewald Groenewald	Cladosporium langeronii	only 5.8S complete, ITS1&2 partial	Yes	Eukaryota; Fungi; Dikarya; Ascomycota; Pezizomycotina; Dothideomycetes; Dothideomycetidae; Capnodiales; Davidiellaceae; mitosporic Davidiellaceae; Cladosporium	Cladosporium langeronii	394564	DQ780379	NR_111223	CBS:189.54				ex-neotype culture of Hormodendrum langeronii
128	Ewald Groenewald	Cladosporium licheniphilum	complete ITS1_5.8S_ITS2		Eukaryota; Fungi; Dikarya; Ascomycota; Pezizomycotina; Dothideomycetes; Dothideomycetidae; Capnodiales; Davidiellaceae; mitosporic Davidiellaceae; Cladosporium	Cladosporium licheniphilum	887074	HM148111		CPC:13224	CBS 125990			ex-epitype culture of Cladosporium licheniphilum
129	Ewald Groenewald	Cladosporium lycoperdinum	only 5.8S complete, ITS1&2 partial	Yes	Eukaryota; Fungi; Dikarya; Ascomycota; Pezizomycotina; Dothideomycetes; Dothideomycetidae; Capnodiales; Davidiellaceae; mitosporic Davidiellaceae; Cladosporium	Cladosporium lycoperdinum	887073	HM148115		VKM:F-2759	CBS 574.78C			verified
130	Ewald Groenewald	Cladosporium macrocarpum	complete ITS1_5.8S_ITS2		Eukaryota; Fungi; Dikarya; Ascomycota; Pezizomycotina; Dothideomycetes; Dothideomycetidae; Capnodiales; Davidiellaceae; mitosporic Davidiellaceae; Cladosporium	Cladosporium macrocarpum	93488	EF679375		CBS:121623				ex-neotype culture of Cladosporium macrocarpum
131	Ewald Groenewald	Cladosporium myrtacearum	complete ITS1_5.8S_ITS2		Eukaryota; Fungi; Dikarya; Ascomycota; Pezizomycotina; Dothideomycetes; Dothideomycetidae; Capnodiales; Davidiellaceae; mitosporic Davidiellaceae; Cladosporium	Cladosporium myrtacearum	887072	HM148117		CPC:14567	CBS 126350			ex-epitype culture of Cladosporium myrtacearum
132	Ewald Groenewald	Cladosporium ossifragi	only 5.8S_ITS2 complete, ITS1 partial	Yes	Eukaryota; Fungi; Dikarya; Ascomycota; Pezizomycotina; Dothideomycetes; Dothideomycetidae; Capnodiales; Davidiellaceae; mitosporic Davidiellaceae; Cladosporium	Cladosporium ossifragi	470172	EF679381		CBS:842.91				ex-epitype culture of Napicladium ossifragi
133	Ewald Groenewald	Cladosporium paracladosporioides	only 5.8S complete, ITS1&2 partial	Yes	Eukaryota; Fungi; Dikarya; Ascomycota; Pezizomycotina; Dothideomycetes; Dothideomycetidae; Capnodiales; Davidiellaceae; mitosporic Davidiellaceae; Cladosporium	Cladosporium paracladosporioides	887097	HM148120		CBS:171.54;ATCC:11278;ATCC:200943;IFO:6369;IMI:049626;MUCL:917;NCTC:4097	CBS 171.54			ex-holotype culture of Cladosporium paracladosporioides
134	Ewald Groenewald	Cladosporium perangustum	complete ITS1_5.8S_ITS2		Eukaryota; Fungi; Dikarya; Ascomycota; Pezizomycotina; Dothideomycetes; Dothideomycetidae; Capnodiales; Davidiellaceae; mitosporic Davidiellaceae; Cladosporium	Cladosporium perangustum	887098	HM148121		CPC:13815	CBS 125996			ex-holotype culture of Cladosporium perangustum
135	Ewald Groenewald	Cladosporium phaenocomae	complete ITS1_5.8S_ITS2		Eukaryota; Fungi; Dikarya; Ascomycota; Pezizomycotina; Dothideomycetes; Dothideomycetidae; Capnodiales; Davidiellaceae; mitosporic Davidiellaceae; Cladosporium	Cladosporium phaenocomae	1049285	JF499837		CBS:128769	CBS 128769			ex-holotype culture of Cladosporium phaenocomae
136	Ewald Groenewald	Cladosporium phlei	complete ITS1_5.8S_ITS2		Eukaryota; Fungi; Dikarya; Ascomycota; Pezizomycotina; Dothideomycetes; Dothideomycetidae; Capnodiales; Davidiellaceae; mitosporic Davidiellaceae; Cladosporium	Cladosporium phlei	1116209	JN906981		CBS:358.69				ex-epitype culture of Cladosporium phlei
137	Ewald Groenewald	Cladosporium phyllactiniicola	only 5.8S_ITS2 complete, ITS1 partial	Yes	Eukaryota; Fungi; Dikarya; Ascomycota; Pezizomycotina; Dothideomycetes; Dothideomycetidae; Capnodiales; Davidiellaceae; mitosporic Davidiellaceae; Cladosporium	Cladosporium phyllactiniicola	887099	HM148153	NR_111537	CPC:11830	CBS 126355			ex-holotype culture of Cladosporium phyllactiniicola
138	Ewald Groenewald	Cladosporium phyllophilum	only 5.8S_ITS2 complete, ITS1 partial	Yes	Eukaryota; Fungi; Dikarya; Ascomycota; Pezizomycotina; Dothideomycetes; Dothideomycetidae; Capnodiales; Davidiellaceae; mitosporic Davidiellaceae; Cladosporium	Cladosporium phyllophilum	887071	HM148154	NR_111538	CPC:11333	CBS 125992			ex-epitype culture of Cladosporium phyllophilum
139	Ewald Groenewald	Cladosporium pini-ponderosae	complete ITS1_5.8S_ITS2		Eukaryota; Fungi; Dikarya; Ascomycota; Pezizomycotina; Dothideomycetes; Dothideomycetidae; Capnodiales; Davidiellaceae; mitosporic Davidiellaceae; Cladosporium	Cladosporium pini-ponderosae	643908	FJ936160		CBS:124456;CPC:13980	CBS 124456;CPC 13980			ex-holotype culture of Cladosporium pini-ponderosae
140	Ewald Groenewald	Cladosporium pseudiridis	only 5.8S_ITS2 complete, ITS1 partial	Yes	Eukaryota; Fungi; Dikarya; Ascomycota; Pezizomycotina; Dothideomycetes; Dothideomycetidae; Capnodiales; Davidiellaceae; mitosporic Davidiellaceae; Cladosporium	Cladosporium pseudiridis	470173	EF679383	NR_111272	CBS:116463				ex-holotype culture of Cladosporium pseudiridis
141	Ewald Groenewald	Cladosporium pseudocladosporioides	complete ITS1_5.8S_ITS2		Eukaryota; Fungi; Dikarya; Ascomycota; Pezizomycotina; Dothideomycetes; Dothideomycetidae; Capnodiales; Davidiellaceae; mitosporic Davidiellaceae; Cladosporium	Cladosporium pseudocladosporioides	887100	HM148158		CPC:14189	CBS 125993			ex-holotype culture of Cladosporium pseudocladosporioides
142	Ewald Groenewald	Cladosporium psychrotolerans	only 5.8S complete, ITS1&2 partial	Yes	Eukaryota; Fungi; Dikarya; Ascomycota; Pezizomycotina; Dothideomycetes; Dothideomycetidae; Capnodiales; Davidiellaceae; mitosporic Davidiellaceae; Cladosporium	Cladosporium psychrotolerans	1052091	DQ780386		CBS:119412;EX:F-391	EXF-391			ex-holotype culture of Cladosporium psychrotolerans
143	Ewald Groenewald	Cladosporium ramotenellum	only 5.8S_ITS2 complete, ITS1 partial	Yes	Eukaryota; Fungi; Dikarya; Ascomycota; Pezizomycotina; Dothideomycetes; Dothideomycetidae; Capnodiales; Davidiellaceae; mitosporic Davidiellaceae; Cladosporium	Cladosporium ramotenellum	470174	EF679384		CBS:121628;CPC:12043				ex-holotype culture of Cladosporium ramotenellum
144	Ewald Groenewald	Cladosporium rectoides	only 5.8S_ITS2 complete, ITS1 partial	Yes	Eukaryota; Fungi; Dikarya; Ascomycota; Pezizomycotina; Dothideomycetes; Dothideomycetidae; Capnodiales; Davidiellaceae; mitosporic Davidiellaceae; Cladosporium	Cladosporium rectoides	887101	HM148193	NR_111539	CPC:11624	CBS 125994			ex-holotype culture of Cladosporium rectoides
145	Ewald Groenewald	Cladosporium salinae	only 5.8S complete, ITS1&2 partial	Yes	Eukaryota; Fungi; Dikarya; Ascomycota; Pezizomycotina; Dothideomycetes; Dothideomycetidae; Capnodiales; Davidiellaceae; mitosporic Davidiellaceae; Cladosporium	Cladosporium salinae	1052097	DQ780374		CBS:119413;EX:F-335	EXF-335			ex-holotype culture of Cladosporium salinae
146	Ewald Groenewald	Cladosporium scabrellum	complete ITS1_5.8S_ITS2		Eukaryota; Fungi; Dikarya; Ascomycota; Pezizomycotina; Dothideomycetes; Dothideomycetidae; Capnodiales; Davidiellaceae; mitosporic Davidiellaceae; Cladosporium	Cladosporium scabrellum	887102	HM148195		CPC:14976	CBS 126358			ex-holotype culture of Cladosporium scabrellum
147	Ewald Groenewald	Cladosporium silenes	only 5.8S complete, ITS1&2 partial	Yes	Eukaryota; Fungi; Dikarya; Ascomycota; Pezizomycotina; Dothideomycetes; Dothideomycetidae; Capnodiales; Davidiellaceae; mitosporic Davidiellaceae; Cladosporium	Cladosporium silenes	1051333	EF679354	NR_111270	CBS:109082				ex-holotype culture of Cladosporium silenes
148	Ewald Groenewald	Cladosporium sinuosum	only 5.8S_ITS2 complete, ITS1 partial	Yes	Eukaryota; Fungi; Dikarya; Ascomycota; Pezizomycotina; Dothideomycetes; Dothideomycetidae; Capnodiales; Davidiellaceae; mitosporic Davidiellaceae; Cladosporium	Cladosporium sinuosum	470175	EF679386		CBS:121629;CPC:11839				ex-holotype culture of Cladosporium sinuosum
149	Ewald Groenewald	Cladosporium soldanellae	complete ITS1_5.8S_ITS2		Eukaryota; Fungi; Dikarya; Ascomycota; Pezizomycotina; Dothideomycetes; Dothideomycetidae; Capnodiales; Davidiellaceae; mitosporic Davidiellaceae; Cladosporium	Cladosporium soldanellae	1116210	JN906982		CPC:13153	CPC 13153			ex-neotype culture of Cladosporium soldanellae
150	Ewald Groenewald	Cladosporium sphaerospermum	only 5.8S complete, ITS1&2 partial	Yes	Eukaryota; Fungi; Dikarya; Ascomycota; Pezizomycotina; Dothideomycetes; Dothideomycetidae; Capnodiales; Davidiellaceae; mitosporic Davidiellaceae; Cladosporium	Cladosporium sphaerospermum	92950	DQ780343	NR_111222	CBS:193.54				ex-neotype culture of Cladosporium sphaerospermum
151	Ewald Groenewald	Cladosporium spinulosum	only 5.8S_ITS2 complete, ITS1 partial	Yes	Eukaryota; Fungi; Dikarya; Ascomycota; Pezizomycotina; Dothideomycetes; Dothideomycetidae; Capnodiales; Davidiellaceae; mitosporic Davidiellaceae; Cladosporium	Cladosporium spinulosum	470176	EF679388		CBS:119907;CPC:12040				ex-holotype culture of Cladosporium spinulosum
152	Ewald Groenewald	Cladosporium subinflatum	only 5.8S_ITS2 complete, ITS1 partial	Yes	Eukaryota; Fungi; Dikarya; Ascomycota; Pezizomycotina; Dothideomycetes; Dothideomycetidae; Capnodiales; Davidiellaceae; mitosporic Davidiellaceae; Cladosporium	Cladosporium subinflatum	470177	EF679389		CBS:121630;CPC:12041				ex-holotype culture of Cladosporium subinflatum
153	Ewald Groenewald	Cladosporium subtilissimum	only 5.8S complete, ITS1&2 partial	Yes	Eukaryota; Fungi; Dikarya; Ascomycota; Pezizomycotina; Dothideomycetes; Dothideomycetidae; Capnodiales; Davidiellaceae; mitosporic Davidiellaceae; Cladosporium	Cladosporium subtilissimum	470181	EF679397	NR_111273	CBS:113754				ex-holotype culture of Cladosporium subtilissimum
154	Ewald Groenewald	Cladosporium subuliforme	only ITS1_5.8S complete, ITS2 partial		Eukaryota; Fungi; Dikarya; Ascomycota; Pezizomycotina; Dothideomycetes; Dothideomycetidae; Capnodiales; Davidiellaceae; mitosporic Davidiellaceae; Cladosporium	Cladosporium subuliforme	887103	HM148196		CPC:13735	CBS 126500			ex-holotype culture of Cladosporium subuliforme
155	Ewald Groenewald	Cladosporium tenellum	only 5.8S_ITS2 complete, ITS1 partial	Yes	Eukaryota; Fungi; Dikarya; Ascomycota; Pezizomycotina; Dothideomycetes; Dothideomycetidae; Capnodiales; Davidiellaceae; mitosporic Davidiellaceae; Cladosporium	Cladosporium tenellum	470178	EF679401		CBS:121634;CPC:12053				ex-holotype culture of Cladosporium tenellum
156	Ewald Groenewald	Cladosporium tenuissimum	complete ITS1_5.8S_ITS2		Eukaryota; Fungi; Dikarya; Ascomycota; Pezizomycotina; Dothideomycetes; Dothideomycetidae; Capnodiales; Davidiellaceae; mitosporic Davidiellaceae; Cladosporium	Cladosporium tenuissimum	70808	HM148197		CPC:14253	CBS 125995			ex-epitype culture of Cladosporium tenuissimum
157	Ewald Groenewald	Cladosporium variabile	complete ITS1_5.8S_ITS2		Eukaryota; Fungi; Dikarya; Ascomycota; Pezizomycotina; Dothideomycetes; Dothideomycetidae; Capnodiales; Davidiellaceae; mitosporic Davidiellaceae; Cladosporium	Cladosporium variabile	219599	EF679402		CBS:121635;CPC:12751				ex-epitype culture of Heterosporium variabile
158	Ewald Groenewald	Cladosporium varians	complete ITS1_5.8S_ITS2		Eukaryota; Fungi; Dikarya; Ascomycota; Pezizomycotina; Dothideomycetes; Dothideomycetidae; Capnodiales; Davidiellaceae; mitosporic Davidiellaceae; Cladosporium	Cladosporium varians	887104	HM148224		CPC:13658	CBS 126362			ex-holotype culture of Cladosporium varians
159	Ewald Groenewald	Cladosporium velox	only 5.8S complete, ITS1&2 partial	Yes	Eukaryota; Fungi; Dikarya; Ascomycota; Pezizomycotina; Dothideomycetes; Dothideomycetidae; Capnodiales; Davidiellaceae; mitosporic Davidiellaceae; Cladosporium	Cladosporium velox	891392	DQ780361		CBS:119417;CPC:11224				ex-holotype culture of Cladosporium velox
160	Ewald Groenewald	Cladosporium verrucocladosporioides	complete ITS1_5.8S_ITS2	Yes	Eukaryota; Fungi; Dikarya; Ascomycota; Pezizomycotina; Dothideomycetes; Dothideomycetidae; Capnodiales; Davidiellaceae; mitosporic Davidiellaceae; Cladosporium	Cladosporium verrucocladosporioides	887105	HM148226	NR_111540	CPC:12300	CBS 126363			ex-holotype culture of Cladosporium verrucocladosporioides
161	Ewald Groenewald	Cladosporium xylophilum	complete ITS1_5.8S_ITS2	Yes	Eukaryota; Fungi; Dikarya; Ascomycota; Pezizomycotina; Dothideomycetes; Dothideomycetidae; Capnodiales; Davidiellaceae; mitosporic Davidiellaceae; Cladosporium	Cladosporium xylophilum	887106	HM148230	NR_111541	CPC:12403	CBS 125997			ex-holotype culture of Cladosporium xylophilum
162		Theleporus membranaceus	only 5.8S complete, ITS1&2 partial		Eukaryota; Fungi; Dikarya; Basidiomycota; Agaricomycotina; Agaricomycetes; Polyporales; Polyporaceae; Theleporus	Theleporus membranaceus	1226782	JN411120					IFP:Dai 12075	holotype of Theleporus membranaceus
163		Grammothele denticulata	only 5.8S complete, ITS1&2 partial		Eukaryota; Fungi; Dikarya; Basidiomycota; Agaricomycotina; Agaricomycetes; Polyporales; Polyporaceae; Grammothele	Grammothele denticulata	1226779	JN411113					IFP:Cui 8860	holotype of Grammothele denticulata	1
164		Theleporus minisporus	only 5.8S complete, ITS1&2 partial		Eukaryota; Fungi; Dikarya; Basidiomycota; Agaricomycotina; Agaricomycetes; Polyporales; Polyporaceae; Theleporus	Theleporus minisporus	1226783	JN411121					IFP:Dai 12011	holotype of Theleporus minisporus
165	Ewald Groenewald	Colletotrichum acerbum	only 5.8S_ITS2 complete, ITS1 partial	Yes	Eukaryota; Fungi; Dikarya; Ascomycota; Pezizomycotina; Sordariomycetes; Hypocreomycetidae; Glomerellales; Glomerellaceae; mitosporic Glomerellaceae; Colletotrichum	Colletotrichum acerbum	1209912	JQ948459	NR_111754	CBS:128530	CBS 128530			ex-holotype culture of Colletotrichum acerbum
167	Ewald Groenewald	Colletotrichum australe	only 5.8S_ITS2 complete, ITS1 partial	Yes	Eukaryota; Fungi; Dikarya; Ascomycota; Pezizomycotina; Sordariomycetes; Hypocreomycetidae; Glomerellales; Glomerellaceae; mitosporic Glomerellaceae; Colletotrichum	Colletotrichum australe	1209913	JQ948455	NR_111752	CBS:116478	CBS 116478			ex-holotype culture of Colletotrichum australe
168	Ewald Groenewald	Colletotrichum brisbanense	only 5.8S_ITS2 complete, ITS1 partial	Yes	Eukaryota; Fungi; Dikarya; Ascomycota; Pezizomycotina; Sordariomycetes; Hypocreomycetidae; Glomerellales; Glomerellaceae; mitosporic Glomerellaceae; Colletotrichum	Colletotrichum brisbanense	1209914	JQ948291	NR_111746	CBS:292.67	CBS 292.67			ex-holotype culture of Colletotrichum brisbanense
169	Ewald Groenewald	Colletotrichum chrysanthemi	only 5.8S_ITS2 complete, ITS1 partial	Yes	Eukaryota; Fungi; Dikarya; Ascomycota; Pezizomycotina; Sordariomycetes; Hypocreomycetidae; Glomerellales; Glomerellaceae; mitosporic Glomerellaceae; Colletotrichum	Colletotrichum chrysanthemi	1145235	JQ948273		IMI:364540				verified
170	Ewald Groenewald	Colletotrichum cosmi	only 5.8S_ITS2 complete, ITS1 partial	Yes	Eukaryota; Fungi; Dikarya; Ascomycota; Pezizomycotina; Sordariomycetes; Hypocreomycetidae; Glomerellales; Glomerellaceae; mitosporic Glomerellaceae; Colletotrichum	Colletotrichum cosmi	1209915	JQ948274	NR_111739	CBS:853.73	CBS 853.73			ex-holotype culture of Colletotrichum cosmi
171	Ewald Groenewald	Colletotrichum costaricense	only 5.8S_ITS2 complete, ITS1 partial	Yes	Eukaryota; Fungi; Dikarya; Ascomycota; Pezizomycotina; Sordariomycetes; Hypocreomycetidae; Glomerellales; Glomerellaceae; mitosporic Glomerellaceae; Colletotrichum	Colletotrichum costaricense	1209916	JQ948180	NR_111731	CBS:330.75	CBS 330.75			ex-holotype culture of Colletotrichum costaricense
172	Ewald Groenewald	Colletotrichum cuscutae	only 5.8S_ITS2 complete, ITS1 partial	Yes	Eukaryota; Fungi; Dikarya; Ascomycota; Pezizomycotina; Sordariomycetes; Hypocreomycetidae; Glomerellales; Glomerellaceae; mitosporic Glomerellaceae; Colletotrichum	Colletotrichum cuscutae	1209917	JQ948195	NR_111735	IMI:304802				ex-holotype culture of Colletotrichum cuscutae
173	Ewald Groenewald	Colletotrichum fioriniae	only 5.8S_ITS2 complete, ITS1 partial	Yes	Eukaryota; Fungi; Dikarya; Ascomycota; Pezizomycotina; Sordariomycetes; Hypocreomycetidae; Glomerellales; Glomerellaceae; mitosporic Glomerellaceae; Colletotrichum	Colletotrichum fioriniae	710243	JQ948292	NR_111747	CBS:128517	CBS 128517			ex-holotype culture of Colletotrichum fioriniae
174	Ewald Groenewald	Colletotrichum godetiae	only 5.8S_ITS2 complete, ITS1 partial	Yes	Eukaryota; Fungi; Dikarya; Ascomycota; Pezizomycotina; Sordariomycetes; Hypocreomycetidae; Glomerellales; Glomerellaceae; mitosporic Glomerellaceae; Colletotrichum	Colletotrichum godetiae	1209918	JQ948402	NR_103691	CBS:133.44	CBS 133.44			ex-holotype culture of Colletotrichum godetiae
175	Ewald Groenewald	Colletotrichum guajavae	only 5.8S_ITS2 complete, ITS1 partial	Yes	Eukaryota; Fungi; Dikarya; Ascomycota; Pezizomycotina; Sordariomycetes; Hypocreomycetidae; Glomerellales; Glomerellaceae; mitosporic Glomerellaceae; Colletotrichum	Colletotrichum guajavae	1209919	JQ948270	NR_111738	IMI:350839				ex-holotype culture of Colletotrichum guajavae
176	Ewald Groenewald	Colletotrichum indonesiense	only 5.8S_ITS2 complete, ITS1 partial	Yes	Eukaryota; Fungi; Dikarya; Ascomycota; Pezizomycotina; Sordariomycetes; Hypocreomycetidae; Glomerellales; Glomerellaceae; mitosporic Glomerellaceae; Colletotrichum	Colletotrichum indonesiense	1209920	JQ948288	NR_111744	CBS:127551	CBS 127551			ex-holotype culture of Colletotrichum indonesiense
177	Ewald Groenewald	Colletotrichum johnstonii	only 5.8S_ITS2 complete, ITS1 partial	Yes	Eukaryota; Fungi; Dikarya; Ascomycota; Pezizomycotina; Sordariomycetes; Hypocreomycetidae; Glomerellales; Glomerellaceae; mitosporic Glomerellaceae; Colletotrichum	Colletotrichum johnstonii	1209921	JQ948444	NR_111748	CBS:128532	CBS 128532			ex-holotype culture of Colletotrichum johnstonii
178	Ewald Groenewald	Colletotrichum kinghornii	only 5.8S_ITS2 complete, ITS1 partial	Yes	Eukaryota; Fungi; Dikarya; Ascomycota; Pezizomycotina; Sordariomycetes; Hypocreomycetidae; Glomerellales; Glomerellaceae; mitosporic Glomerellaceae; Colletotrichum	Colletotrichum kinghornii	1209922	JQ948454	NR_111751	CBS:198.35	CBS 198.35			ex-holotype culture of Colletotrichum kinghornii
179	Ewald Groenewald	Colletotrichum laticiphilum	only 5.8S_ITS2 complete, ITS1 partial	Yes	Eukaryota; Fungi; Dikarya; Ascomycota; Pezizomycotina; Sordariomycetes; Hypocreomycetidae; Glomerellales; Glomerellaceae; mitosporic Glomerellaceae; Colletotrichum	Colletotrichum laticiphilum	1209923	JQ948289	NR_111745	CBS:112989	CBS 112989			ex-holotype culture of Colletotrichum laticiphilum
180	Ewald Groenewald	Colletotrichum limetticola	only 5.8S_ITS2 complete, ITS1 partial	Yes	Eukaryota; Fungi; Dikarya; Ascomycota; Pezizomycotina; Sordariomycetes; Hypocreomycetidae; Glomerellales; Glomerellaceae; mitosporic Glomerellaceae; Colletotrichum	Colletotrichum limetticola	1209924	JQ948193	NR_111733	CBS:114.14	CBS 114.14			ex-epitype culture of Gloeosporium limetticola
181	Ewald Groenewald	Colletotrichum lupini	only 5.8S_ITS2 complete, ITS1 partial	Yes	Eukaryota; Fungi; Dikarya; Ascomycota; Pezizomycotina; Sordariomycetes; Hypocreomycetidae; Glomerellales; Glomerellaceae; mitosporic Glomerellaceae; Colletotrichum	Colletotrichum lupini	145971	JQ948155	NR_111730	CBS:109225	CBS 109225			ex-neotype culture of Gloeosporium lupini
182	Ewald Groenewald	Colletotrichum melonis	only 5.8S_ITS2 complete, ITS1 partial	Yes	Eukaryota; Fungi; Dikarya; Ascomycota; Pezizomycotina; Sordariomycetes; Hypocreomycetidae; Glomerellales; Glomerellaceae; mitosporic Glomerellaceae; Colletotrichum	Colletotrichum melonis	1209925	JQ948194	NR_111734	CBS:159.84	CBS 159.84			ex-holotype culture of Colletotrichum melonis
183	Ewald Groenewald	Colletotrichum orchidophilum	only 5.8S_ITS2 complete, ITS1 partial	Yes	Eukaryota; Fungi; Dikarya; Ascomycota; Pezizomycotina; Sordariomycetes; Hypocreomycetidae; Glomerellales; Glomerellaceae; mitosporic Glomerellaceae; Colletotrichum	Colletotrichum orchidophilum	1209926	JQ948151	NR_111729	CBS:632.80	CBS 632.80			ex-holotype culture of Colletotrichum orchidophilum
184	Ewald Groenewald	Colletotrichum paxtonii	only 5.8S_ITS2 complete, ITS1 partial	Yes	Eukaryota; Fungi; Dikarya; Ascomycota; Pezizomycotina; Sordariomycetes; Hypocreomycetidae; Glomerellales; Glomerellaceae; mitosporic Glomerellaceae; Colletotrichum	Colletotrichum paxtonii	1209927	JQ948285	NR_111742	IMI:165753				ex-holotype culture of Colletotrichum paxtonii
185	Ewald Groenewald	Colletotrichum phormii	only 5.8S_ITS2 complete, ITS1 partial	Yes	Eukaryota; Fungi; Dikarya; Ascomycota; Pezizomycotina; Sordariomycetes; Hypocreomycetidae; Glomerellales; Glomerellaceae; mitosporic Glomerellaceae; Colletotrichum	Colletotrichum phormii	359342	JQ948446	NR_111750	CBS:118194	CBS 118194			ex-epitype culture of Colletotrichum phormii
186	Ewald Groenewald	Colletotrichum pseudoacutatum	only 5.8S_ITS2 complete, ITS1 partial	Yes	Eukaryota; Fungi; Dikarya; Ascomycota; Pezizomycotina; Sordariomycetes; Hypocreomycetidae; Glomerellales; Glomerellaceae; mitosporic Glomerellaceae; Colletotrichum	Colletotrichum pseudoacutatum	1209928	JQ948480	NR_111756	CBS:436.77	CBS 436.77			ex-holotype culture of Colletotrichum pseudoacutatum
187	Ewald Groenewald	Colletotrichum pyricola	only 5.8S_ITS2 complete, ITS1 partial	Yes	Eukaryota; Fungi; Dikarya; Ascomycota; Pezizomycotina; Sordariomycetes; Hypocreomycetidae; Glomerellales; Glomerellaceae; mitosporic Glomerellaceae; Colletotrichum	Colletotrichum pyricola	1209929	JQ948445	NR_111749	CBS:128531	CBS 128531			ex-holotype culture of Colletotrichum pyricola
188	Ewald Groenewald	Colletotrichum rhombiforme	only 5.8S_ITS2 complete, ITS1 partial	Yes	Eukaryota; Fungi; Dikarya; Ascomycota; Pezizomycotina; Sordariomycetes; Hypocreomycetidae; Glomerellales; Glomerellaceae; mitosporic Glomerellaceae; Colletotrichum	Colletotrichum rhombiforme	1209930	JQ948457	NR_111753	CBS:129953	CBS 129953			ex-holotype culture of Colletotrichum rhombiforme
189	Ewald Groenewald	Colletotrichum salicis	only 5.8S_ITS2 complete, ITS1 partial	Yes	Eukaryota; Fungi; Dikarya; Ascomycota; Pezizomycotina; Sordariomycetes; Hypocreomycetidae; Glomerellales; Glomerellaceae; mitosporic Glomerellaceae; Colletotrichum	Colletotrichum salicis	1209931	JQ948460	NR_111755	CBS:607.94	CBS 607.94			ex-epitype culture of Colletotrichum salicis
190	Ewald Groenewald	Colletotrichum scovillei	only 5.8S_ITS2 complete, ITS1 partial	Yes	Eukaryota; Fungi; Dikarya; Ascomycota; Pezizomycotina; Sordariomycetes; Hypocreomycetidae; Glomerellales; Glomerellaceae; mitosporic Glomerellaceae; Colletotrichum	Colletotrichum scovillei	1209932	JQ948267	NR_111737	CBS:126529	CBS 126529			ex-holotype culture of Colletotrichum scovillei
191	Ewald Groenewald	Colletotrichum simmondsii	only 5.8S_ITS2 complete, ITS1 partial	Yes	Eukaryota; Fungi; Dikarya; Ascomycota; Pezizomycotina; Sordariomycetes; Hypocreomycetidae; Glomerellales; Glomerellaceae; mitosporic Glomerellaceae; Colletotrichum	Colletotrichum simmondsii	703756	JQ948276	NR_111741	CBS:122122	CBS 122122			ex-holotype culture of Colletotrichum simmondsii
192	Ewald Groenewald	Colletotrichum sloanei	only 5.8S_ITS2 complete, ITS1 partial	Yes	Eukaryota; Fungi; Dikarya; Ascomycota; Pezizomycotina; Sordariomycetes; Hypocreomycetidae; Glomerellales; Glomerellaceae; mitosporic Glomerellaceae; Colletotrichum	Colletotrichum sloanei	1209933	JQ948287	NR_111743	IMI:364297				ex-holotype culture of Colletotrichum sloanei
193	Ewald Groenewald	Colletotrichum tamarilloi	only 5.8S_ITS2 complete, ITS1 partial	Yes	Eukaryota; Fungi; Dikarya; Ascomycota; Pezizomycotina; Sordariomycetes; Hypocreomycetidae; Glomerellales; Glomerellaceae; mitosporic Glomerellaceae; Colletotrichum	Colletotrichum tamarilloi	1209934	JQ948184	NR_111732	CBS:129814	CBS 129814			ex-holotype culture of Colletotrichum tamarilloi
194	Ewald Groenewald	Colletotrichum walleri	only 5.8S_ITS2 complete, ITS1 partial	Yes	Eukaryota; Fungi; Dikarya; Ascomycota; Pezizomycotina; Sordariomycetes; Hypocreomycetidae; Glomerellales; Glomerellaceae; mitosporic Glomerellaceae; Colletotrichum	Colletotrichum walleri	1209935	JQ948275	NR_111740	CBS:125472	CBS 125472			ex-holotype culture of Colletotrichum walleri
195		Inonotus tenuicontextus	only 5.8S complete, ITS1&2 partial		Eukaryota; Fungi; Dikarya; Basidiomycota; Agaricomycotina; Agaricomycetes; Hymenochaetales; Hymenochaetaceae; Inonotus	Inonotus tenuicontextus	1087229	JN169786					IFP:Yuan 5526	holotype of Inonotus tenuicontextus
197		Diaporthe ambigua	only 5.8S complete, ITS1&2 partial		Eukaryota; Fungi; Dikarya; Ascomycota; Pezizomycotina; Sordariomycetes; Sordariomycetidae; Diaporthales; Diaporthaceae; Diaporthe	Diaporthe ambigua	73123	AF230767		CBS:114015;STEU:2657	STE-U 2657			ex-type culture of Diaporthe ambigua
198	Ewald Groenewald	Diaporthe amygdali	complete ITS1_5.8S_ITS2	CATTG	Eukaryota; Fungi; Dikarya; Ascomycota; Pezizomycotina; Sordariomycetes; Sordariomycetidae; Diaporthales; Diaporthaceae; Diaporthe	Diaporthe amygdali	1214568	GQ281791		CBS:126679	3B		CBS:H-20420	ex-epitype culture of Diaporthe amygdali
199		Diaporthe angelicae	complete ITS1_5.8S_ITS2	CATTG	Eukaryota; Fungi; Dikarya; Ascomycota; Pezizomycotina; Sordariomycetes; Sordariomycetidae; Diaporthales; Diaporthaceae; Diaporthe	Diaporthe angelicae	230357	AY196779		CBS:111592	AR 3776		BPI:842091	ex-type culture of Diaporthe angelicae
200		Diaporthe aspalathi	only 5.8S_ITS2 complete, ITS1 partial		Eukaryota; Fungi; Dikarya; Ascomycota; Pezizomycotina; Sordariomycetes; Sordariomycetidae; Diaporthales; Diaporthaceae; Diaporthe	Diaporthe aspalathi	626713	DQ286275		CBS:117169;CPC:5428	CBS 117169;CPC 5428;R412AY			ex-type culture of Diaporthe aspalathi
201		Diaporthe australafricana	only 5.8S complete, ITS1&2 partial		Eukaryota; Fungi; Dikarya; Ascomycota; Pezizomycotina; Sordariomycetes; Sordariomycetidae; Diaporthales; Diaporthaceae; Diaporthe	Diaporthe australafricana	127596	AF230744		CBS:113487;STEU:2655	STE-U 2655			ex-type culture of Diaporthe australafricana
203	Ewald Groenewald	Diaporthe cotoneastri	only 5.8S_ITS2 complete, ITS1 partial	CATTG	Eukaryota; Fungi; Dikarya; Ascomycota; Pezizomycotina; Sordariomycetes; Sordariomycetidae; Diaporthales; Diaporthaceae; Diaporthe	Diaporthe cotoneastri	1214570	FJ889450		CBS:439.82	CBS 439.82		CBS:H-7633	ex-holotype culture of Phomopsis cotoneastri
204	Ewald Groenewald	Diaporthe cuppatea	only 5.8S_ITS2 complete, ITS1 partial	CATTG	Eukaryota; Fungi; Dikarya; Ascomycota; Pezizomycotina; Sordariomycetes; Sordariomycetidae; Diaporthales; Diaporthaceae; Diaporthe	Diaporthe cuppatea	1214571	AY339322		CBS:117499	R433R		CBS:H-19687	ex-holotype culture of Diaporthe cuppatea
206		Diaporthe lusitanicae	only 5.8S_ITS2 complete, ITS1 partial	CATTG	Eukaryota; Fungi; Dikarya; Ascomycota; Pezizomycotina; Sordariomycetes; Sordariomycetidae; Diaporthales; Diaporthaceae; Diaporthe	Diaporthe lusitanicae	573504	GQ250190		CBS:123213	CBS 123213		CBS:H-20130	ex-type culture of Diaporthe lusitanicae
211		Diaporthe pterocarpicola	only 5.8S_ITS2 complete, ITS1 partial		Eukaryota; Fungi; Dikarya; Ascomycota; Pezizomycotina; Sordariomycetes; Sordariomycetidae; Diaporthales; Diaporthaceae; Diaporthe	Diaporthe pterocarpicola	1214576	JQ619887	NR_111713	MFLUCC:10-0580a	MFLUCC 10-0580a			ex-type culture of Diaporthe pterocarpicola
212	Ewald Groenewald	Diaporthe sclerotioides	complete ITS1_5.8S_ITS2	CATTG	Eukaryota; Fungi; Dikarya; Ascomycota; Pezizomycotina; Sordariomycetes; Sordariomycetidae; Diaporthales; Diaporthaceae; Diaporthe	Diaporthe sclerotioides	1214577	AF439626	NR_111069	CBS:296.67	CBS 296.67			ex-type culture of Phomopsis sclerotioides
213		Diaporthe stewartii	only 5.8S_ITS2 complete, ITS1 partial	CATTG	Eukaryota; Fungi; Dikarya; Ascomycota; Pezizomycotina; Sordariomycetes; Sordariomycetidae; Diaporthales; Diaporthaceae; Diaporthe	Diaporthe stewartii	699518	FJ889448	NR_111417	CBS:193.36	CBS 193.36			ex-type culture of Diaporthe stewartii
214		Diaporthe thunbergii	only 5.8S_ITS2 complete, ITS1 partial		Eukaryota; Fungi; Dikarya; Ascomycota; Pezizomycotina; Sordariomycetes; Sordariomycetidae; Diaporthales; Diaporthaceae; Diaporthe	Diaporthe thunbergii	1214579	JQ619893	NR_111714	MFLUCC:10-0576a	MFLUCC 10-0576a			ex-type culture of Diaporthe thunbergii
216		Phomopsis emicis	only 5.8S_ITS2 complete, ITS1 partial		Eukaryota; Fungi; Dikarya; Ascomycota; Pezizomycotina; Sordariomycetes; Sordariomycetidae; Diaporthales; Valsaceae; mitosporic Valsaceae; Phomopsis	Phomopsis emicis	1046553	JF957784	NR_111631	BRIP:45089a				ex-type culture of Phomopsis emicis
217		Cortinarius harrisonii	only 5.8S complete, ITS1&2 partial		Eukaryota; Fungi; Dikarya; Basidiomycota; Agaricomycotina; Agaricomycetes; Agaricomycetidae; Agaricales; Cortinariaceae; Cortinarius	Cortinarius harrisonii	1232103	JX045675			ASM3128		EIU:ASM3128	holotype of Cortinarius harrisonii
218		Cortinarius neosanguineus	only 5.8S complete, ITS1&2 partial	Yes	Eukaryota; Fungi; Dikarya; Basidiomycota; Agaricomycotina; Agaricomycetes; Agaricomycetidae; Agaricales; Cortinariaceae; Cortinarius	Cortinarius neosanguineus	1232104	JX045678			TN09-130		H:TN09-130	holotype of Cortinarius neosanguineus
219		Cortinarius sierraensis	only 5.8S complete, ITS1&2 partial	Yes	Eukaryota; Fungi; Dikarya; Basidiomycota; Agaricomycotina; Agaricomycetes; Agaricomycetidae; Agaricales; Cortinariaceae; Cortinarius	Cortinarius sierraensis	1232105	JX045687			HDT32671		SFSU:HDT32671	holotype of Cortinarius sierraensis
220		Cortinarius aurantiobasis	only 5.8S complete, ITS1&2 partial	Yes	Eukaryota; Fungi; Dikarya; Basidiomycota; Agaricomycotina; Agaricomycetes; Agaricomycetidae; Agaricales; Cortinariaceae; Cortinarius	Cortinarius aurantiobasis	561959	JX045670			AHS24213		MICH:10318	holotype of Cortinarius aurantiobasis
221		Cortinarius cascadensis	only 5.8S complete, ITS1&2 partial	Yes	Eukaryota; Fungi; Dikarya; Basidiomycota; Agaricomycotina; Agaricomycetes; Agaricomycetidae; Agaricales; Cortinariaceae; Cortinarius	Cortinarius cascadensis	1232100	JX045671			JFA6156		MICH:10330	holotype of Cortinarius cascadensis
222		Cortinarius chrysolitus	only 5.8S complete, ITS1&2 partial	Yes	Eukaryota; Fungi; Dikarya; Basidiomycota; Agaricomycotina; Agaricomycetes; Agaricomycetidae; Agaricales; Cortinariaceae; Cortinarius	Cortinarius chrysolitus	1232101	JX045672					MICH:10332	holotype of Cortinarius chrysolitus	1
223		Cortinarius humboldtensis	only 5.8S complete, ITS1&2 partial	Yes	Eukaryota; Fungi; Dikarya; Basidiomycota; Agaricomycotina; Agaricomycetes; Agaricomycetidae; Agaricales; Cortinariaceae; Cortinarius	Cortinarius humboldtensis	1232102	JX045673			AHS56392		MICH:10362	holotype of Cortinarius humboldtensis
224		Cortinarius idahoensis	only 5.8S complete, ITS1&2 partial	Yes	Eukaryota; Fungi; Dikarya; Basidiomycota; Agaricomycotina; Agaricomycetes; Agaricomycetidae; Agaricales; Cortinariaceae; Cortinarius	Cortinarius idahoensis	47349	JX045669			AHS71073		MICH:5524	holotype of Cortinarius idahoensis	1
225		Cortinarius marylandensis	only 5.8S complete, ITS1&2 partial	Yes	Eukaryota; Fungi; Dikarya; Basidiomycota; Agaricomycotina; Agaricomycetes; Agaricomycetidae; Agaricales; Cortinariaceae; Cortinarius	Cortinarius marylandensis	47353	JX045690			JFA7936		WTU:F-040674	holotype of Cortinarius marylandensis
227		Cortinarius vitiosus	only 5.8S complete, ITS1&2 partial		Eukaryota; Fungi; Dikarya; Basidiomycota; Agaricomycotina; Agaricomycetes; Agaricomycetidae; Agaricales; Cortinariaceae; Cortinarius	Cortinarius vitiosus	47360	JN114098					IB:MM1974/0117	holotype of Cortinarius vitiosus
229	Kare Liimatainen	Cortinarius sanguineus	only 5.8S complete, ITS1&2 partial	Yes	Eukaryota; Fungi; Dikarya; Basidiomycota; Agaricomycotina; Agaricomycetes; Agaricomycetidae; Agaricales; Cortinariaceae; Cortinarius	Cortinarius sanguineus	304759	JN114099					UPS:SL22091940	neotype of Cortinarius sanguineus	2
230	Ewald Groenewald	Colletotrichum anthrisci	only 5.8S_ITS2 complete, ITS1 partial	Yes	Eukaryota; Fungi; Dikarya; Ascomycota; Pezizomycotina; Sordariomycetes; Hypocreomycetidae; Glomerellales; Glomerellaceae; mitosporic Glomerellaceae; Colletotrichum	Colletotrichum anthrisci	708185	GU227845	NR_111456	CBS:125334	CBS 125334			ex-type culture of Colletotrichum anthrisci
231	Peter Johnston	Colletotrichum brevisporum	complete ITS1_5.8S_ITS2	Yes	Eukaryota; Fungi; Dikarya; Ascomycota; Pezizomycotina; Sordariomycetes; Hypocreomycetidae; Glomerellales; Glomerellaceae; mitosporic Glomerellaceae; Colletotrichum	Colletotrichum brevisporum	1125787	JN050238	NR_111637	BCC<THA>:38876	L57/LC0600			ex-type culture of Colletotrichum brevisporum
232	Ewald Groenewald	Colletotrichum chlorophyti	only 5.8S_ITS2 complete, ITS1 partial	Yes	Eukaryota; Fungi; Dikarya; Ascomycota; Pezizomycotina; Sordariomycetes; Hypocreomycetidae; Glomerellales; Glomerellaceae; mitosporic Glomerellaceae; Colletotrichum	Colletotrichum chlorophyti	708187	GU227894	NR_111460	IMI:103806				ex-type culture of Colletotrichum chlorophyti
233	Ewald Groenewald	Colletotrichum coccodes	complete ITS1_5.8S_ITS2	Yes	Eukaryota; Fungi; Dikarya; Ascomycota; Pezizomycotina; Sordariomycetes; Hypocreomycetidae; Glomerellales; Glomerellaceae; mitosporic Glomerellaceae; Colletotrichum	Colletotrichum coccodes	27358	HM171679		CBS:369.75	CBS 369.75			ex-neotype culture of Colletotrichum coccodes
234	Ewald Groenewald	Colletotrichum cordylinicola	complete ITS1_5.8S_ITS2		Eukaryota; Fungi; Dikarya; Ascomycota; Pezizomycotina; Sordariomycetes; Hypocreomycetidae; Glomerellales; Glomerellaceae; mitosporic Glomerellaceae; Colletotrichum	Colletotrichum cordylinicola	858296	HM470246		BCC<THA>:38872	LC0856			ex-type culture of Colletotrichum cordylinicola
235	Ewald Groenewald	Colletotrichum curcumae	only 5.8S_ITS2 complete, ITS1 partial	Yes	Eukaryota; Fungi; Dikarya; Ascomycota; Pezizomycotina; Sordariomycetes; Hypocreomycetidae; Glomerellales; Glomerellaceae; mitosporic Glomerellaceae; Colletotrichum	Colletotrichum curcumae	708188	GU227893	NR_111459	IMI:288937				ex-type culture of Colletotrichum curcumae
236	Ewald Groenewald	Colletotrichum dematium	only 5.8S_ITS2 complete, ITS1 partial	Yes	Eukaryota; Fungi; Dikarya; Ascomycota; Pezizomycotina; Sordariomycetes; Hypocreomycetidae; Glomerellales; Glomerellaceae; mitosporic Glomerellaceae; Colletotrichum	Colletotrichum dematium	34405	GU227819	NR_111453	CBS:125.25	CBS 125.25			ex-type culture of Colletotrichum dematium
237	Ewald Groenewald	Colletotrichum dracaenophilum	only 5.8S complete, ITS1&2 partial		Eukaryota; Fungi; Dikarya; Ascomycota; Pezizomycotina; Sordariomycetes; Hypocreomycetidae; Glomerellales; Glomerellaceae; mitosporic Glomerellaceae; Colletotrichum	Colletotrichum dracaenophilum	359343	DQ286209		CBS:118199	MEP1532		BPI:871498	ex-type culture of Colletotrichum dracaenophilum
238	Ewald Groenewald	Colletotrichum fructi	only 5.8S_ITS2 complete, ITS1 partial	Yes	Eukaryota; Fungi; Dikarya; Ascomycota; Pezizomycotina; Sordariomycetes; Hypocreomycetidae; Glomerellales; Glomerellaceae; mitosporic Glomerellaceae; Colletotrichum	Colletotrichum fructi	708189	GU227844	NR_111455	CBS:346.37	CBS 346.37			ex-type culture of Colletotrichum fructi
239	Ewald Groenewald	Colletotrichum gloeosporioides	only 5.8S_ITS2 complete, ITS1 partial		Eukaryota; Fungi; Dikarya; Ascomycota; Pezizomycotina; Sordariomycetes; Hypocreomycetidae; Glomerellales; Glomerellaceae; mitosporic Glomerellaceae; Colletotrichum	Colletotrichum gloeosporioides	474922	GQ485605		CBS:953.97	CBS 953.97		IMI:356878	ex-epitype culture of Vermicularia gloeosporioides
240	Cathie Aime	Inocybe magnifolia	complete ITS1_5.8S_ITS2		Eukaryota; Fungi; Dikarya; Basidiomycota; Agaricomycotina; Agaricomycetes; Agaricomycetidae; Agaricales; Inocybaceae; Inocybe	Inocybe magnifolia	1091282	JN642228			MCA2441		BRG:MCA2441	holotype of Inocybe magnifolia
242	Cathie Aime	Inocybe rhodella	complete ITS1_5.8S_ITS2		Eukaryota; Fungi; Dikarya; Basidiomycota; Agaricomycotina; Agaricomycetes; Agaricomycetidae; Agaricales; Inocybaceae; Inocybe	Inocybe rhodella	1091284	JN642230			MCA3917		BRG:MCA3917	holotype of Inocybe rhodella
243	Cathie Aime	Inocybe lepidotella	complete ITS1_5.8S_ITS2	Yes	Eukaryota; Fungi; Dikarya; Basidiomycota; Agaricomycotina; Agaricomycetes; Agaricomycetidae; Agaricales; Inocybaceae; Inocybe	Inocybe lepidotella	1148793	JN642233			MCA1881		BRG:MCA1881;TENN:066442	holotype of Inocybe lepidotella	1
244		Rasamsonia argillacea	complete ITS1_5.8S_ITS2	Yes	Eukaryota; Fungi; Dikarya; Ascomycota; Pezizomycotina; Eurotiomycetes; Eurotiomycetidae; Eurotiales; Trichocomaceae; Rasamsonia	Rasamsonia argillacea	69808	JF417491	NR_103623	CBS:101.69	CBS 101.69			ex-holotype culture of Penicillium argillaceum
245		Rasamsonia brevistipitata	complete ITS1_5.8S_ITS2	Yes	Eukaryota; Fungi; Dikarya; Ascomycota; Pezizomycotina; Eurotiomycetes; Eurotiomycetidae; Eurotiales; Trichocomaceae; Rasamsonia	Rasamsonia brevistipitata	1132858	JF417488		CBS:128785	CBS 128785			ex-holotype culture of Rasamsonia brevistipitata
246		Rasamsonia byssochlamydoides	complete ITS1_5.8S_ITS2	Yes	Eukaryota; Fungi; Dikarya; Ascomycota; Pezizomycotina; Eurotiomycetes; Eurotiomycetidae; Eurotiales; Trichocomaceae; Rasamsonia	Rasamsonia byssochlamydoides	89139	JF417476		CBS:413.71	CBS 413.71		CBS:H-7816	ex-holotype culture of Paecilomyces byssochlamydoides
247		Rasamsonia cylindrospora	complete ITS1_5.8S_ITS2	Yes	Eukaryota; Fungi; Dikarya; Ascomycota; Pezizomycotina; Eurotiomycetes; Eurotiomycetidae; Eurotiales; Trichocomaceae; Rasamsonia	Rasamsonia cylindrospora	68829	JF417470	NR_103622	CBS:275.58	CBS 275.58		IMI:071623	ex-neotype culture of Penicillium cylindrosporum
248		Rasamsonia eburnea	complete ITS1_5.8S_ITS2	Yes	Eukaryota; Fungi; Dikarya; Ascomycota; Pezizomycotina; Eurotiomycetes; Eurotiomycetidae; Eurotiales; Trichocomaceae; Rasamsonia	Rasamsonia eburnea	68826	JF417483		CBS:100538	CBS 100538			ex-holotype culture of Talaromyces eburneus
249		Rasamsonia composticola	only 5.8S_ITS2 complete, ITS1 partial	Yes	Eukaryota; Fungi; Dikarya; Ascomycota; Pezizomycotina; Eurotiomycetes; Eurotiomycetidae; Eurotiales; Trichocomaceae; Rasamsonia	Rasamsonia composticola	1186049	JF970184	NR_111632	CGMCC:3.13669	CGMCC 3.13669			ex-holotype culture of Rasamsonia composticola
250	Cobus Visagie	Penicillium namyslowskii	only 5.8S_ITS2 complete, ITS1 partial	Yes	Eukaryota; Fungi; Dikarya; Ascomycota; Pezizomycotina; Eurotiomycetes; Eurotiomycetidae; Eurotiales; Aspergillaceae; Penicillium	Penicillium namyslowskii	96007	AF033463		NRRL:1070	NRRL 1070			ex-holotype culture of Penicillium namyslowskii
251	Seung-Beom Hong	Aspergillus cibarius	only 5.8S_ITS2 complete, ITS1 partial	Yes	Eukaryota; Fungi; Dikarya; Ascomycota; Pezizomycotina; Eurotiomycetes; Eurotiomycetidae; Eurotiales; Aspergillaceae; Aspergillus	Aspergillus cibarius	1235455	JQ918177	NR_111728	KACC:46346	KACC 46346			ex-type culture of Aspergillus cibarius
252	Ewald Groenewald	Pestalotiopsis asiatica	only 5.8S_ITS2 complete, ITS1 partial	Yes	Eukaryota; Fungi; Dikarya; Ascomycota; Pezizomycotina; Sordariomycetes; Xylariomycetidae; Xylariales; Amphisphaeriaceae; mitosporic Amphisphaeriaceae; Pestalotiopsis	Pestalotiopsis asiatica	1235603	JX398983		MFLUCC:12-0286	MFLUCC12-0286		MFLU:12-0422	ex-holotype culture of Pestalotiopsis asiatica
254	Ewald Groenewald	Pestalotiopsis diversiseta	only 5.8S_ITS2 complete, ITS1 partial	Yes	Eukaryota; Fungi; Dikarya; Ascomycota; Pezizomycotina; Sordariomycetes; Xylariomycetidae; Xylariales; Amphisphaeriaceae; mitosporic Amphisphaeriaceae; Pestalotiopsis	Pestalotiopsis diversiseta	1235565	JX399009		MFLUCC:12-0287	MFLUCC12-0287		HMAS:047261	ex-holotype culture of Pestalotiopsis diversiseta
255	Sajeewa Maharachchikumbura	Pestalotiopsis inflexa	only 5.8S_ITS2 complete, ITS1 partial	Yes	Eukaryota; Fungi; Dikarya; Ascomycota; Pezizomycotina; Sordariomycetes; Xylariomycetidae; Xylariales; Amphisphaeriaceae; mitosporic Amphisphaeriaceae; Pestalotiopsis	Pestalotiopsis inflexa	1235567	JX399008	NR_111789	MFLUCC:12-0270	MFLUCC 12-0270			ex-holotype culture of Pestalotiopsis inflexa
256	Ewald Groenewald	Pestalotiopsis intermedia	only 5.8S_ITS2 complete, ITS1 partial	Yes	Eukaryota; Fungi; Dikarya; Ascomycota; Pezizomycotina; Sordariomycetes; Xylariomycetidae; Xylariales; Amphisphaeriaceae; mitosporic Amphisphaeriaceae; Pestalotiopsis	Pestalotiopsis intermedia	1235568	JX398993		MFLUCC:12-0259	MFLUCC12-0259		HMAS:047642	ex-holotype culture of Pestalotiopsis intermedia
257	Sajeewa Maharachchikumbura	Pestalotiopsis linearis	only 5.8S_ITS2 complete, ITS1 partial	Yes	Eukaryota; Fungi; Dikarya; Ascomycota; Pezizomycotina; Sordariomycetes; Xylariomycetidae; Xylariales; Amphisphaeriaceae; mitosporic Amphisphaeriaceae; Pestalotiopsis	Pestalotiopsis linearis	1235569	JX398992		MFLUCC:12-0271	MFLUCC12-0271		MFLU:12-0414	ex-holotype culture of Pestalotiopsis linearis
258	Ewald Groenewald	Pestalotiopsis rosea	only 5.8S_ITS2 complete, ITS1 partial	Yes	Eukaryota; Fungi; Dikarya; Ascomycota; Pezizomycotina; Sordariomycetes; Xylariomycetidae; Xylariales; Amphisphaeriaceae; mitosporic Amphisphaeriaceae; Pestalotiopsis	Pestalotiopsis rosea	1235570	JX399005		MFLUCC:12-0258	MFLUCC12-0258		MFLU:12-0409	ex-holotype culture of Pestalotiopsis rosea
259	Ewald Groenewald	Pestalotiopsis saprophytica	only 5.8S_ITS2 complete, ITS1 partial	Yes	Eukaryota; Fungi; Dikarya; Ascomycota; Pezizomycotina; Sordariomycetes; Xylariomycetidae; Xylariales; Amphisphaeriaceae; mitosporic Amphisphaeriaceae; Pestalotiopsis	Pestalotiopsis saprophytica	1415905	JX398982		MFLUCC:12-0282	MFLUCC12-0282		HMAS:047136	ex-holotype culture of Pestalotiopsis saprophyta
260	Ewald Groenewald	Pestalotiopsis unicolor	only 5.8S_ITS2 complete, ITS1 partial	Yes	Eukaryota; Fungi; Dikarya; Ascomycota; Pezizomycotina; Sordariomycetes; Xylariomycetidae; Xylariales; Amphisphaeriaceae; mitosporic Amphisphaeriaceae; Pestalotiopsis	Pestalotiopsis unicolor	1235574	JX398999	NR_111787	MFLUCC:12-0276	MFLUCC 12-0276			ex-holotype culture of Pestalotiopsis unicolor
261	Ewald Groenewald	Pestalotiopsis verruculosa	only 5.8S_ITS2 complete, ITS1 partial	Yes	Eukaryota; Fungi; Dikarya; Ascomycota; Pezizomycotina; Sordariomycetes; Xylariomycetidae; Xylariales; Amphisphaeriaceae; mitosporic Amphisphaeriaceae; Pestalotiopsis	Pestalotiopsis verruculosa	1235575	JX398996		MFLUCC:12-0274	MFLUCC12-0274		HMAS:047309	ex-holotype culture of Pestalotiopsis verruculosa
262		Simplicillium cylindrosporum	complete ITS1_5.8S_ITS2	Yes	Eukaryota; Fungi; Dikarya; Ascomycota; Pezizomycotina; Sordariomycetes; Hypocreomycetidae; Hypocreales; Cordycipitaceae; mitosporic Cordycipitaceae; Simplicillium	Simplicillium cylindrosporum	935211	AB603989	NR_111023	JCM:18169	FKI-4955;JCM 18169			ex-type culture of Simplicillium cylindrosporum
263		Simplicillium subtropicum	only 5.8S_ITS2 complete, ITS1 partial	Yes	Eukaryota; Fungi; Dikarya; Ascomycota; Pezizomycotina; Sordariomycetes; Hypocreomycetidae; Hypocreales; Cordycipitaceae; mitosporic Cordycipitaceae; Simplicillium	Simplicillium subtropicum	935212	AB603990	NR_111024	JCM:18180	FKI-4956;JCM 18180			ex-type culture of Simplicillium subtropicum
264		Simplicillium minatense	complete ITS1_5.8S_ITS2	Yes	Eukaryota; Fungi; Dikarya; Ascomycota; Pezizomycotina; Sordariomycetes; Hypocreomycetidae; Hypocreales; Cordycipitaceae; mitosporic Cordycipitaceae; Simplicillium	Simplicillium minatense	935213	AB603992	NR_111025	JCM:18176	FKI-4981;JCM 18176			ex-type culture of Simplicillium minatense
265		Simplicillium aogashimaense	complete ITS1_5.8S_ITS2	Yes	Eukaryota; Fungi; Dikarya; Ascomycota; Pezizomycotina; Sordariomycetes; Hypocreomycetidae; Hypocreales; Cordycipitaceae; mitosporic Cordycipitaceae; Simplicillium	Simplicillium aogashimaense	935214	AB604002	NR_111026	JCM:18167	FKI-5881;JCM 18167			ex-type culture of Simplicillium aogashimaense
266		Simplicillium sympodiophorum	complete ITS1_5.8S_ITS2	Yes	Eukaryota; Fungi; Dikarya; Ascomycota; Pezizomycotina; Sordariomycetes; Hypocreomycetidae; Hypocreales; Cordycipitaceae; mitosporic Cordycipitaceae; Simplicillium	Simplicillium sympodiophorum	935215	AB604003	NR_111027	JCM:18184	FKI-5883;JCM 18184			ex-type culture of Simplicillium sympodiophorum
268		Wickerhamomyces chaumierensis	only 5.8S complete, ITS1&2 partial		Eukaryota; Fungi; Dikarya; Ascomycota; Saccharomycotina; Saccharomycetes; Saccharomycetales; Phaffomycetaceae; Wickerhamomyces	Wickerhamomyces chaumierensis	1041606	HM156503	NR_111542	CBS:8565	CBS 8565			ex-type culture of Wickerhamomyces chaumierensis
272		Cyberlindnera samutprakarnensis	complete ITS1_5.8S_ITS2		Eukaryota; Fungi; Dikarya; Ascomycota; Saccharomycotina; Saccharomycetes; Saccharomycetales; Phaffomycetaceae; Cyberlindnera	Cyberlindnera samutprakarnensis	1241557	AB695388		CBS:12528	JP52			ex-type culture of Cyberlindnera samutprakarnensis
273		Candida thasaenensis	complete ITS1_5.8S_ITS2		Eukaryota; Fungi; Dikarya; Ascomycota; Saccharomycotina; Saccharomycetes; Saccharomycetales; mitosporic Saccharomycetales; Candida	Candida thasaenensis	1241568	AB686644	NR_111028	CBS:12529	JP59			ex-type culture of Candida thasaenensis
274		Bambusicola bambusae	only ITS1_5.8S complete, ITS2 partial		Eukaryota; Fungi; Dikarya; Ascomycota; Pezizomycotina; Dothideomycetes; Pleosporomycetidae; Pleosporales; Massarineae; Trematosphaeriaceae; Bambusicola	Bambusicola bambusae	1238262	JX442031		MFLUCC:11-0614	MFLUCC 11-0614			ex-holotype culture of Bambusicola bambusae
275		Bambusicola irregulispora	only ITS1_5.8S complete, ITS2 partial		Eukaryota; Fungi; Dikarya; Ascomycota; Pezizomycotina; Dothideomycetes; Pleosporomycetidae; Pleosporales; Massarineae; Trematosphaeriaceae; Bambusicola	Bambusicola irregulispora	1238263	JX442032		MFLUCC:11-0437	MFLUCC 11-0437			ex-holotype culture of Bambusicola irregulispora
276		Bambusicola massarinia	only ITS1_5.8S complete, ITS2 partial		Eukaryota; Fungi; Dikarya; Ascomycota; Pezizomycotina; Dothideomycetes; Pleosporomycetidae; Pleosporales; Massarineae; Trematosphaeriaceae; Bambusicola	Bambusicola massarinia	1238264	JX442033		MFLUCC:11-0389	MFLUCC 11-0389			ex-holotype culture of Bambusicola massarinia
277		Bambusicola splendida	only ITS1_5.8S complete, ITS2 partial		Eukaryota; Fungi; Dikarya; Ascomycota; Pezizomycotina; Dothideomycetes; Pleosporomycetidae; Pleosporales; Massarineae; Trematosphaeriaceae; Bambusicola	Bambusicola splendida	1238265	JX442034		MFLUCC:11-0439	MFLUCC 11-0439			ex-holotype culture of Bambusicola splendida
278	Conrad Schoch	Lactifluus dissitus	only ITS1_5.8S complete, ITS2 partial		Eukaryota; Fungi; Dikarya; Basidiomycota; Agaricomycotina; Agaricomycetes; Russulales; Russulaceae; Lactifluus	Lactifluus dissitus	1071001	JN388978			AV-KD-KVP09-134		GENT:AV-KD-KVP09-134	verified	1
279		Lactifluus leptomerus	complete ITS1_5.8S_ITS2		Eukaryota; Fungi; Dikarya; Basidiomycota; Agaricomycotina; Agaricomycetes; Russulales; Russulaceae; Lactifluus	Lactifluus leptomerus	1071000	JN388972			AV-KD-KVP09-131		GENT:AV-KD-KVP09-131	holotype of Lactifluus leptomerus
280		Lactifluus versiformis	complete ITS1_5.8S_ITS2	Yes	Eukaryota; Fungi; Dikarya; Basidiomycota; Agaricomycotina; Agaricomycetes; Russulales; Russulaceae; Lactifluus	Lactifluus versiformis	1070999	JN388965			AV-KD-KVP09-006		GENT:AV-KD-KVP09-006	holotype of Lactifluus versiformis	2
281		Purpureocillium lilacinum	only 5.8S complete, ITS1&2 partial		Eukaryota; Fungi; Dikarya; Ascomycota; Pezizomycotina; Sordariomycetes; Hypocreomycetidae; Hypocreales; Ophiocordycipitaceae; mitosporic Ophiocordycipitaceae; Purpureocillium	Purpureocillium lilacinum	33203	FR734101	NR_111432	CBS:284.36				ex-type culture of Penicillium lilacinum
282		Purpureocillium lavendulum	only 5.8S complete, ITS1&2 partial		Eukaryota; Fungi; Dikarya; Ascomycota; Pezizomycotina; Sordariomycetes; Hypocreomycetidae; Hypocreales; Ophiocordycipitaceae; mitosporic Ophiocordycipitaceae; Purpureocillium	Purpureocillium lavendulum	1247861	FR734106	NR_111433	FMR:10376				ex-holotype culture of Purpureocillium lavendulum
283	Conrad Schoch	Kellermania anomala	only 5.8S complete, ITS1&2 partial		Eukaryota; Fungi; Dikarya; Ascomycota; Pezizomycotina; Dothideomycetes; Dothideomycetes incertae sedis; Botryosphaeriales; Planistromellaceae; Kellermania	Kellermania anomala	1248178	JX444853		CBS:132218			BPI:882814	verified
284		Kellermania confusa	only 5.8S complete, ITS1&2 partial		Eukaryota; Fungi; Dikarya; Ascomycota; Pezizomycotina; Dothideomycetes; Dothideomycetes incertae sedis; Botryosphaeriales; Planistromellaceae; Kellermania	Kellermania confusa	1248285	JX444854		CBS:131723			BPI:882824	ex-holotype culture of Kellermania confusa
285	Conrad Schoch	Kellermania crassispora	only 5.8S complete, ITS1&2 partial		Eukaryota; Fungi; Dikarya; Ascomycota; Pezizomycotina; Dothideomycetes; Dothideomycetes incertae sedis; Botryosphaeriales; Planistromellaceae; Kellermania	Kellermania crassispora	1248286	JX444855		CBS:131714			BPI:882815	verified
286		Kellermania dasylirionicola	only 5.8S complete, ITS1&2 partial		Eukaryota; Fungi; Dikarya; Ascomycota; Pezizomycotina; Dothideomycetes; Dothideomycetes incertae sedis; Botryosphaeriales; Planistromellaceae; Kellermania	Kellermania dasylirionicola	1248287	JX444856		CBS:131720			BPI:882821	ex-holotype culture of Kellermania dasylirionicola
287	Conrad Schoch	Kellermania dasylirionis	only 5.8S complete, ITS1&2 partial		Eukaryota; Fungi; Dikarya; Ascomycota; Pezizomycotina; Dothideomycetes; Dothideomycetes incertae sedis; Botryosphaeriales; Planistromellaceae; Kellermania	Kellermania dasylirionis	1248288	JX444857		CBS:131715			BPI:882816	verified
288	Conrad Schoch	Kellermania macrospora	only 5.8S complete, ITS1&2 partial		Eukaryota; Fungi; Dikarya; Ascomycota; Pezizomycotina; Dothideomycetes; Dothideomycetes incertae sedis; Botryosphaeriales; Planistromellaceae; Kellermania	Kellermania macrospora	1248289	JX444858		CBS:131716			BPI:882817	verified
289		Kellermania micranthae	only 5.8S complete, ITS1&2 partial		Eukaryota; Fungi; Dikarya; Ascomycota; Pezizomycotina; Dothideomycetes; Dothideomycetes incertae sedis; Botryosphaeriales; Planistromellaceae; Kellermania	Kellermania micranthae	1248290	JX444859		CBS:131724			BPI:882825	ex-holotype culture of Kellermania micranthae
290	Conrad Schoch	Kellermania nolinae	only 5.8S complete, ITS1&2 partial		Eukaryota; Fungi; Dikarya; Ascomycota; Pezizomycotina; Dothideomycetes; Dothideomycetes incertae sedis; Botryosphaeriales; Planistromellaceae; Kellermania	Kellermania nolinae	1248185	JX444860		CBS:131717			BPI:882818	verified
291	Conrad Schoch	Kellermania nolinifoliorum	only 5.8S complete, ITS1&2 partial		Eukaryota; Fungi; Dikarya; Ascomycota; Pezizomycotina; Dothideomycetes; Dothideomycetes incertae sedis; Botryosphaeriales; Planistromellaceae; Kellermania	Kellermania nolinifoliorum	1248186	JX444861		CBS:131718			BPI:882819	verified
292	Conrad Schoch	Kellermania plurilocularis	only 5.8S complete, ITS1&2 partial		Eukaryota; Fungi; Dikarya; Ascomycota; Pezizomycotina; Dothideomycetes; Dothideomycetes incertae sedis; Botryosphaeriales; Planistromellaceae; Kellermania	Kellermania plurilocularis	1248291	JX444862		CBS:131719			BPI:882820	verified
293		Kellermania ramaleyae	only 5.8S complete, ITS1&2 partial		Eukaryota; Fungi; Dikarya; Ascomycota; Pezizomycotina; Dothideomycetes; Dothideomycetes incertae sedis; Botryosphaeriales; Planistromellaceae; Kellermania	Kellermania ramaleyae	1248292	JX444863		CBS:131722			BPI:882823	ex-holotype culture of Kellermania ramaleyae
294		Kellermania rostratae	only 5.8S complete, ITS1&2 partial		Eukaryota; Fungi; Dikarya; Ascomycota; Pezizomycotina; Dothideomycetes; Dothideomycetes incertae sedis; Botryosphaeriales; Planistromellaceae; Kellermania	Kellermania rostratae	1248293	JX444864		CBS:131721			BPI:882822	ex-holotype culture of Kellermania rostratae
295	Conrad Schoch	Kellermania uniseptata	only 5.8S complete, ITS1&2 partial		Eukaryota; Fungi; Dikarya; Ascomycota; Pezizomycotina; Dothideomycetes; Dothideomycetes incertae sedis; Botryosphaeriales; Planistromellaceae; Kellermania	Kellermania uniseptata	1248187	JX444866		CBS:131725			BPI:882826	verified
296	Conrad Schoch	Kellermania yuccifoliorum	only 5.8S complete, ITS1&2 partial		Eukaryota; Fungi; Dikarya; Ascomycota; Pezizomycotina; Dothideomycetes; Dothideomycetes incertae sedis; Botryosphaeriales; Planistromellaceae; Kellermania	Kellermania yuccifoliorum	1248189	JX444867		CBS:131726			BPI:882827	verified
297	Conrad Schoch	Kellermania yuccigena	only 5.8S complete, ITS1&2 partial		Eukaryota; Fungi; Dikarya; Ascomycota; Pezizomycotina; Dothideomycetes; Dothideomycetes incertae sedis; Botryosphaeriales; Planistromellaceae; Kellermania	Kellermania yuccigena	1248188	JX444868		CBS:131727			BPI:882828	verified
298		Cystoderma andinum	only 5.8S complete, ITS1&2 partial		Eukaryota; Fungi; Dikarya; Basidiomycota; Agaricomycotina; Agaricomycetes; Agaricomycetidae; Agaricales; Agaricaceae; Cystoderma	Cystoderma andinum	511155	AM946481					C:57998	isotype of Cystoderma andinum
299		Cystoderma japonicum	only 5.8S complete, ITS1&2 partial		Eukaryota; Fungi; Dikarya; Basidiomycota; Agaricomycotina; Agaricomycetes; Agaricomycetidae; Agaricales; Agaricaceae; Cystoderma	Cystoderma japonicum	511162	AM946491					BR<BEL>:BR5020079022647;personal:Hongo:6221	holotype of Cystoderma japonicum
300		Cystoderma tuomikoskii	only 5.8S complete, ITS1&2 partial		Eukaryota; Fungi; Dikarya; Basidiomycota; Agaricomycotina; Agaricomycetes; Agaricomycetidae; Agaricales; Agaricaceae; Cystoderma	Cystoderma tuomikoskii	511156	AM946505					H:RT23.08.1974	holotype of Cystoderma tuomikoskii
301		Cystodermella papallactae	only 5.8S complete, ITS1&2 partial		Eukaryota; Fungi; Dikarya; Basidiomycota; Agaricomycotina; Agaricomycetes; Agaricomycetidae; Agaricales; Tricholomataceae; Cystodermella	Cystodermella papallactae	511166	AM946521					C:58002	isotype of Cystodermella papallactae
302		Ripartitella alba	only 5.8S complete, ITS1&2 partial		Eukaryota; Fungi; Dikarya; Basidiomycota; Agaricomycotina; Agaricomycetes; Agaricomycetidae; Agaricales; Agaricaceae; Ripartitella	Ripartitella alba	511175	AM946525			RH 7182		NY:80066	isotype of Ripartitella alba
303	Ewald Groenewald	Cylindrocladiella australiensis	only 5.8S_ITS2 complete, ITS1 partial	Yes	Eukaryota; Fungi; Dikarya; Ascomycota; Pezizomycotina; Sordariomycetes; Hypocreomycetidae; Hypocreales; Nectriaceae; mitosporic Nectriaceae; Cylindrocladiella	Cylindrocladiella australiensis	1078092	JN100624	NR_111652	CBS:129567	CBS 129567			ex-holotype culture of Cylindrocladiella australiensis
304	Ewald Groenewald	Cylindrocladiella clavata	only 5.8S_ITS2 complete, ITS1 partial	Yes	Eukaryota; Fungi; Dikarya; Ascomycota; Pezizomycotina; Sordariomycetes; Hypocreomycetidae; Hypocreales; Nectriaceae; mitosporic Nectriaceae; Cylindrocladiella	Cylindrocladiella clavata	1137939	JN099095	NR_111639	CBS:129564	CBS 129564			ex-holotype culture of Cylindrocladiella clavata
305	Ewald Groenewald	Cylindrocladiella cymbiformis	only 5.8S_ITS2 complete, ITS1 partial	Yes	Eukaryota; Fungi; Dikarya; Ascomycota; Pezizomycotina; Sordariomycetes; Hypocreomycetidae; Hypocreales; Nectriaceae; mitosporic Nectriaceae; Cylindrocladiella	Cylindrocladiella cymbiformis	1137940	JN099103	NR_111642	CBS:129553	CBS 129553			ex-holotype culture of Cylindrocladiella cymbiformis
306		Cylindrocladiella elegans	only 5.8S_ITS2 complete, ITS1 partial	Yes	Eukaryota; Fungi; Dikarya; Ascomycota; Pezizomycotina; Sordariomycetes; Hypocreomycetidae; Hypocreales; Nectriaceae; mitosporic Nectriaceae; Cylindrocladiella	Cylindrocladiella elegans	147878	AY793444	NR_103586	CBS:338.92	CBS 338.92			ex-holotype culture of Cylindrocladiella elegans
307	Ewald Groenewald	Cylindrocladiella ellipsoidea	only 5.8S_ITS2 complete, ITS1 partial	Yes	Eukaryota; Fungi; Dikarya; Ascomycota; Pezizomycotina; Sordariomycetes; Hypocreomycetidae; Hypocreales; Nectriaceae; mitosporic Nectriaceae; Cylindrocladiella	Cylindrocladiella ellipsoidea	1078093	JN099094	NR_111638	CBS:129573	CBS 129573			ex-holotype culture of Cylindrocladiella ellipsoidea
308	Ewald Groenewald	Cylindrocladiella hawaiiensis	only 5.8S_ITS2 complete, ITS1 partial	Yes	Eukaryota; Fungi; Dikarya; Ascomycota; Pezizomycotina; Sordariomycetes; Hypocreomycetidae; Hypocreales; Nectriaceae; mitosporic Nectriaceae; Cylindrocladiella	Cylindrocladiella hawaiiensis	1078094	JN100621	NR_111651	CBS:129569	CBS 129569			ex-holotype culture of Cylindrocladiella hawaiiensis
309		Cylindrocladiella infestans	only 5.8S_ITS2 complete, ITS1 partial	Yes	Eukaryota; Fungi; Dikarya; Ascomycota; Pezizomycotina; Sordariomycetes; Hypocreomycetidae; Hypocreales; Nectriaceae; mitosporic Nectriaceae; Cylindrocladiella	Cylindrocladiella infestans	147874	AF220955	NR_111053	ATCC:44816	ATCC 44816			ex-holotype culture of Cylindrocladiella infestans
310	Ewald Groenewald	Cylindrocladiella kurandica	only 5.8S_ITS2 complete, ITS1 partial	Yes	Eukaryota; Fungi; Dikarya; Ascomycota; Pezizomycotina; Sordariomycetes; Hypocreomycetidae; Hypocreales; Nectriaceae; mitosporic Nectriaceae; Cylindrocladiella	Cylindrocladiella kurandica	1078095	JN100646	NR_111654	CBS:129577	CBS 129577			ex-holotype culture of Cylindrocladiella kurandica
311		Cylindrocladiella lageniformis	only 5.8S_ITS2 complete, ITS1 partial	Yes	Eukaryota; Fungi; Dikarya; Ascomycota; Pezizomycotina; Sordariomycetes; Hypocreomycetidae; Hypocreales; Nectriaceae; mitosporic Nectriaceae; Cylindrocladiella	Cylindrocladiella lageniformis	147879	AF220959	NR_111054	CBS:340.92	UFV115			ex-holotype culture of Cylindrocladiella lageniformis
312	Ewald Groenewald	Cylindrocladiella lanceolata	only 5.8S_ITS2 complete, ITS1 partial	Yes	Eukaryota; Fungi; Dikarya; Ascomycota; Pezizomycotina; Sordariomycetes; Hypocreomycetidae; Hypocreales; Nectriaceae; mitosporic Nectriaceae; Cylindrocladiella	Cylindrocladiella lanceolata	1078096	JN099099	NR_111641	CBS:129566	CBS 129566			ex-holotype culture of Cylindrocladiella lanceolata
313	Ewald Groenewald	Cylindrocladiella longiphialidica	only 5.8S_ITS2 complete, ITS1 partial	Yes	Eukaryota; Fungi; Dikarya; Ascomycota; Pezizomycotina; Sordariomycetes; Hypocreomycetidae; Hypocreales; Nectriaceae; mitosporic Nectriaceae; Cylindrocladiella	Cylindrocladiella longiphialidica	1078097	JN100585	NR_111646	CBS:129557	CBS 129557			ex-holotype culture of Cylindrocladiella longiphialidica
314		Cylindrocladiella microcylindrica	only 5.8S_ITS2 complete, ITS1 partial	Yes	Eukaryota; Fungi; Dikarya; Ascomycota; Pezizomycotina; Sordariomycetes; Hypocreomycetidae; Hypocreales; Nectriaceae; mitosporic Nectriaceae; Cylindrocladiella	Cylindrocladiella microcylindrica	137495	AY793452		CBS:111794;ATCC:38571;CPC:2375	CPC 10451			ex-holotype culture of Cylindrocladiella microcylindrica
315	Ewald Groenewald	Cylindrocladiella natalensis	only 5.8S_ITS2 complete, ITS1 partial	Yes	Eukaryota; Fungi; Dikarya; Ascomycota; Pezizomycotina; Sordariomycetes; Hypocreomycetidae; Hypocreales; Nectriaceae; mitosporic Nectriaceae; Cylindrocladiella	Cylindrocladiella natalensis	1078099	JN100588	NR_111647	CBS:114943	CBS 114943			ex-holotype culture of Cylindrocladiella natalensis
316	Ewald Groenewald	Cylindrocladiella nederlandica	only 5.8S_ITS2 complete, ITS1 partial	Yes	Eukaryota; Fungi; Dikarya; Ascomycota; Pezizomycotina; Sordariomycetes; Hypocreomycetidae; Hypocreales; Nectriaceae; mitosporic Nectriaceae; Cylindrocladiella	Cylindrocladiella nederlandica	1078100	JN100603	NR_111648	CBS:152.91	CBS 152.91			ex-holotype culture of Cylindrocladiella nederlandica
317		Cylindrocladiella novae-zelandiae	only 5.8S_ITS2 complete, ITS1 partial	Yes	Eukaryota; Fungi; Dikarya; Ascomycota; Pezizomycotina; Sordariomycetes; Hypocreomycetidae; Hypocreales; Nectriaceae; mitosporic Nectriaceae; Cylindrocladiella	Cylindrocladiella novae-zelandiae	147880	AF220963	NR_111055	ATCC:44815	ATCC 44815			ex-holotype culture of Cylindrocladiella novaezelandiae
318		Cylindrocladiella parva	only 5.8S complete, ITS1&2 partial	Yes	Eukaryota; Fungi; Dikarya; Ascomycota; Pezizomycotina; Sordariomycetes; Hypocreomycetidae; Hypocreales; Nectriaceae; mitosporic Nectriaceae; Cylindrocladiella	Cylindrocladiella parva	137496	AF220964	NR_111056	ATCC:28272	ATCC 28272			ex-holotype culture of Cylindrocladiella parva
319		Cylindrocladiella peruviana	only 5.8S_ITS2 complete, ITS1 partial	Yes	Eukaryota; Fungi; Dikarya; Ascomycota; Pezizomycotina; Sordariomycetes; Hypocreomycetidae; Hypocreales; Nectriaceae; mitosporic Nectriaceae; Cylindrocladiella	Cylindrocladiella peruviana	147881	AF220966		CPC:2404	IMUR1843			ex-holotype culture of Cylindrocladiella peruviana
320	Ewald Groenewald	Cylindrocladiella pseudocamelliae	only 5.8S_ITS2 complete, ITS1 partial	Yes	Eukaryota; Fungi; Dikarya; Ascomycota; Pezizomycotina; Sordariomycetes; Hypocreomycetidae; Hypocreales; Nectriaceae; mitosporic Nectriaceae; Cylindrocladiella	Cylindrocladiella pseudocamelliae	1078101	JN100577	NR_111644	CBS:129555	CBS 129555			ex-holotype culture of Cylindrocladiella pseudocamelliae
321	Ewald Groenewald	Cylindrocladiella pseudohawaiiensis	only 5.8S_ITS2 complete, ITS1 partial	Yes	Eukaryota; Fungi; Dikarya; Ascomycota; Pezizomycotina; Sordariomycetes; Hypocreomycetidae; Hypocreales; Nectriaceae; mitosporic Nectriaceae; Cylindrocladiella	Cylindrocladiella pseudohawaiiensis	1078102	JN099128	NR_111643	CBS:210.94	CBS 210.94			ex-holotype culture of Cylindrocladiella pseudohawaiiensis
322		Cylindrocladiella pseudoinfestans	only 5.8S_ITS2 complete, ITS1 partial	Yes	Eukaryota; Fungi; Dikarya; Ascomycota; Pezizomycotina; Sordariomycetes; Hypocreomycetidae; Hypocreales; Nectriaceae; mitosporic Nectriaceae; Cylindrocladiella	Cylindrocladiella pseudoinfestans	1137941	AF220957		CBS:114531;CPC:2319;STEU:2319	STE-U 2319			ex-holotype culture of Cylindrocladiella pseudoinfestans	1
323	Ewald Groenewald	Cylindrocladiella pseudoparva	only 5.8S_ITS2 complete, ITS1 partial	Yes	Eukaryota; Fungi; Dikarya; Ascomycota; Pezizomycotina; Sordariomycetes; Hypocreomycetidae; Hypocreales; Nectriaceae; mitosporic Nectriaceae; Cylindrocladiella	Cylindrocladiella pseudoparva	1078103	JN100620	NR_111650	CBS:129560	CBS 129560			ex-holotype culture of Cylindrocladiella pseudoparva
324	Ewald Groenewald	Cylindrocladiella queenslandica	only 5.8S_ITS2 complete, ITS1 partial	Yes	Eukaryota; Fungi; Dikarya; Ascomycota; Pezizomycotina; Sordariomycetes; Hypocreomycetidae; Hypocreales; Nectriaceae; mitosporic Nectriaceae; Cylindrocladiella	Cylindrocladiella queenslandica	1137942	JN099098	NR_111640	CBS:129574	CBS 129574			ex-holotype culture of Cylindrocladiella queenslandica
325	Ewald Groenewald	Cylindrocladiella stellenboschensis	only 5.8S_ITS2 complete, ITS1 partial	Yes	Eukaryota; Fungi; Dikarya; Ascomycota; Pezizomycotina; Sordariomycetes; Hypocreomycetidae; Hypocreales; Nectriaceae; mitosporic Nectriaceae; Cylindrocladiella	Cylindrocladiella stellenboschensis	1078120	JN100615	NR_111649	CBS:110668	CBS 110668			ex-holotype culture of Cylindrocladiella stellenboschensis
326	Ewald Groenewald	Cylindrocladiella thailandica	only 5.8S_ITS2 complete, ITS1 partial	Yes	Eukaryota; Fungi; Dikarya; Ascomycota; Pezizomycotina; Sordariomycetes; Hypocreomycetidae; Hypocreales; Nectriaceae; mitosporic Nectriaceae; Cylindrocladiella	Cylindrocladiella thailandica	1078121	JN100582	NR_111645	CBS:129571	CBS 129571			ex-holotype culture of Cylindrocladiella thailandica
327	Ewald Groenewald	Cylindrocladiella variabilis	only 5.8S_ITS2 complete, ITS1 partial	Yes	Eukaryota; Fungi; Dikarya; Ascomycota; Pezizomycotina; Sordariomycetes; Hypocreomycetidae; Hypocreales; Nectriaceae; mitosporic Nectriaceae; Cylindrocladiella	Cylindrocladiella variabilis	1078122	JN100643	NR_111653	CBS:129561	CBS 129561			ex-holotype culture of Cylindrocladiella variabilis
328		Cylindrocladiella viticola	only 5.8S_ITS2 complete, ITS1 partial	Yes	Eukaryota; Fungi; Dikarya; Ascomycota; Pezizomycotina; Sordariomycetes; Hypocreomycetidae; Hypocreales; Nectriaceae; mitosporic Nectriaceae; Cylindrocladiella	Cylindrocladiella viticola	316312	AY793468		CBS:112897;CPC:5606	CBS 112897;CPC 5606			ex-holotype culture of Cylindrocladiella viticola
329	Ewald Groenewald	Colletotrichum hemerocallidis	only 5.8S_ITS2 complete, ITS1 partial		Eukaryota; Fungi; Dikarya; Ascomycota; Pezizomycotina; Sordariomycetes; Hypocreomycetidae; Glomerellales; Glomerellaceae; mitosporic Glomerellaceae; Colletotrichum	Colletotrichum hemerocallidis	1249612	JQ400005	NR_111708	CBS:130642	CDLG5			ex-holotype culture of Colletotrichum hemerocallidis
330		Sympoventuria capensis	complete ITS1_5.8S_ITS2		Eukaryota; Fungi; Dikarya; Ascomycota; Pezizomycotina; Dothideomycetes; Dothideomycetes incertae sedis; Venturiales; Sympoventuriaceae; Sympoventuria	Sympoventuria capensis	408669	DQ885906		CBS:120136	CBS 120136;CPC 12838		CBS:H-19757	ex-holotype culture of Sympoventuria capensis
331		Bandoniozyma noutii	complete ITS1_5.8S_ITS2	Yes	Eukaryota; Fungi; Dikarya; Basidiomycota; Agaricomycotina; Tremellomycetes; Tremellales; Tremellaceae; Bandoniozyma	Bandoniozyma noutii	192656	AF444391	NR_111072	CBS:8364	CBS 8364			ex-holotype culture of Bandoniozyma noutii
332		Bandoniozyma aquatica	only 5.8S_ITS2 complete, ITS1 partial	Yes	Eukaryota; Fungi; Dikarya; Basidiomycota; Agaricomycotina; Tremellomycetes; Tremellales; Tremellaceae; Bandoniozyma	Bandoniozyma aquatica	1147724	JN790616		CBS:12527;ATCC:MYA-4876	UFMG-DH4.20			ex-holotype culture of Bandoniozyma aquatica
333		Bandoniozyma complexa	complete ITS1_5.8S_ITS2	Yes	Eukaryota; Fungi; Dikarya; Basidiomycota; Agaricomycotina; Tremellomycetes; Tremellales; Tremellaceae; Bandoniozyma	Bandoniozyma complexa	1255116	GU321089	NR_111476	CBS:11570	MA28a			ex-holotype culture of Bandoniozyma complexa
334		Bandoniozyma glucofermentans	complete ITS1_5.8S_ITS2	Yes	Eukaryota; Fungi; Dikarya; Basidiomycota; Agaricomycotina; Tremellomycetes; Tremellales; Tremellaceae; Bandoniozyma	Bandoniozyma glucofermentans	1255120	JN381033		CBS:10381;ATCC:MYA-4760;NRRL:Y-48076	BG 02-7-15-015A-1-1			ex-holotype culture of Bandoniozyma glucofermentans
335		Bandoniozyma tunnelae	complete ITS1_5.8S_ITS2		Eukaryota; Fungi; Dikarya; Basidiomycota; Agaricomycotina; Tremellomycetes; Tremellales; Tremellaceae; Bandoniozyma	Bandoniozyma tunnelae	1255125	AF444453	NR_111074	CBS:8024	CBS 8024			ex-holotype culture of Bandoniozyma tunnelae
336		Bandoniozyma visegradensis	only 5.8S_ITS2 complete, ITS1 partial	Yes	Eukaryota; Fungi; Dikarya; Basidiomycota; Agaricomycotina; Tremellomycetes; Tremellales; Tremellaceae; Bandoniozyma	Bandoniozyma visegradensis	1255141	HQ660084	NR_111591	NCAIM:Y.01952	NCAIM Y.01952			ex-holotype culture of Bandoniozyma visegradensis
337		Tiarosporella urbis-rosarum	only 5.8S complete, ITS1&2 partial		Eukaryota; Fungi; Dikarya; Ascomycota; Pezizomycotina; Dothideomycetes; Dothideomycetes incertae sedis; Botryosphaeriales; Botryosphaeriaceae; mitosporic Botryosphaeriaceae; Tiarosporella	Tiarosporella urbis-rosarum	1126558	JQ239407	NR_111705	CMW:36477				ex-holotype culture of Tiarosporella urbis-rosarum
338		Diplodia allocellula	only 5.8S complete, ITS1&2 partial		Eukaryota; Fungi; Dikarya; Ascomycota; Pezizomycotina; Dothideomycetes; Dothideomycetes incertae sedis; Botryosphaeriales; Botryosphaeriaceae; mitosporic Botryosphaeriaceae; Diplodia	Diplodia allocellula	1126557	JQ239398	NR_111701	CMW:36469				ex-paratype culture of Diplodia allocellula
339		Dothiorella dulcispinae	only 5.8S complete, ITS1&2 partial		Eukaryota; Fungi; Dikarya; Ascomycota; Pezizomycotina; Dothideomycetes; Dothideomycetes incertae sedis; Botryosphaeriales; Botryosphaeriaceae; mitosporic Botryosphaeriaceae; Dothiorella	Dothiorella dulcispinae	1126555	JQ239400	NR_111702	CMW:36460				ex-holotype culture of Dothiorella dulcispinae
340		Dothiorella brevicollis	only 5.8S complete, ITS1&2 partial		Eukaryota; Fungi; Dikarya; Ascomycota; Pezizomycotina; Dothideomycetes; Dothideomycetes incertae sedis; Botryosphaeriales; Botryosphaeriaceae; mitosporic Botryosphaeriaceae; Dothiorella	Dothiorella brevicollis	1256273	JQ239403	NR_111703	CMW:36463				ex-holotype culture of Dothiorella brevicollis
341		Dothiorella pretoriensis	only 5.8S complete, ITS1&2 partial		Eukaryota; Fungi; Dikarya; Ascomycota; Pezizomycotina; Dothideomycetes; Dothideomycetes incertae sedis; Botryosphaeriales; Botryosphaeriaceae; Dothiorella	Dothiorella pretoriensis	1126556	JQ239405	NR_111704	CMW:36480				ex-holotype culture of Spencermartinsia pretoriensis
342	Conrad Schoch	Mucor racemosus	complete ITS1_5.8S_ITS2	Yes	Eukaryota; Fungi; Fungi incertae sedis; Early diverging fungal lineages; Mucoromycotina; Mucorales; Mucorineae; Mucoraceae; Mucor	Mucor racemosus	4841	FJ345353		ATCC:42647	ATCC 42647			verified
343		Pichia myanmarensis	only 5.8S complete, ITS1&2 partial		Eukaryota; Fungi; Dikarya; Ascomycota; Saccharomycotina; Saccharomycetes; Saccharomycetales; Pichiaceae; Pichia	Pichia myanmarensis	255684	JX679222	NR_111797	BCRC:23287	BCRC 23287			ex-type culture of Pichia myanmarensis
345		Wickerhamomyces lynferdii	only 5.8S complete, ITS1&2 partial		Eukaryota; Fungi; Dikarya; Ascomycota; Saccharomycotina; Saccharomycetes; Saccharomycetales; Phaffomycetaceae; Wickerhamomyces	Wickerhamomyces lynferdii	1041609	JX679239	NR_111798	BCRC:22676	BCRC 22676			ex-type culture of Wickerhamomyces lynferdii
346		Wickerhamomyces subpelliculosus	only 5.8S_ITS2 complete, ITS1 partial		Eukaryota; Fungi; Dikarya; Ascomycota; Saccharomycotina; Saccharomycetes; Saccharomycetales; Phaffomycetaceae; Wickerhamomyces	Wickerhamomyces subpelliculosus	1194211	FJ153221	NR_111336	NRRL:Y-1683	Lee763;NRRL Y-1683			ex-type culture of Wickerhamomyces subpelliculosa
347		Wickerhamomyces ciferrii	only 5.8S_ITS2 complete, ITS1 partial		Eukaryota; Fungi; Dikarya; Ascomycota; Saccharomycotina; Saccharomycetes; Saccharomycetales; Phaffomycetaceae; Wickerhamomyces	Wickerhamomyces ciferrii	1041607	FJ153218	NR_111335	NRRL:Y-1031	Lee760;NRRL Y-1031			ex-type culture of Wickerhamomyces ciferrii
348		Wickerhamomyces anomalus	only 5.8S_ITS2 complete, ITS1 partial		Eukaryota; Fungi; Dikarya; Ascomycota; Saccharomycotina; Saccharomycetes; Saccharomycetales; Phaffomycetaceae; Wickerhamomyces	Wickerhamomyces anomalus	4927	DQ249196	NR_111210	CBS:5759	CBS 5759			ex-type culture of Wickerhamomyces anomalus	1
349		Candida silvicultrix	only 5.8S complete, ITS1&2 partial		Eukaryota; Fungi; Dikarya; Ascomycota; Saccharomycotina; Saccharomycetes; Saccharomycetales; mitosporic Saccharomycetales; Candida	Candida silvicultrix	51917	JX679238		BCRC:21567	BCRC 21567			ex-type culture of Candida silvicultrix
350		Shivasia solida	complete ITS1_5.8S_ITS2		Eukaryota; Fungi; Dikarya; Basidiomycota; Ustilaginomycotina; Ustilaginomycetes; Ustilaginales; Ustilaginaceae; Shivasia	Shivasia solida	1162419	JF966731		TUB:20001	H.U.V. 17649		personal:Kalman Vanky:H.U.V. 17649	ex-epitype culture of Shivasia solida
351	Ewald Groenewald	Claviradulomyces xylopiae	complete ITS1_5.8S_ITS2		Eukaryota; Fungi; Dikarya; Ascomycota; Pezizomycotina; Lecanoromycetes; Ostropomycetidae; Ostropales; Odontotremataceae; Claviradulomyces	Claviradulomyces xylopiae	1261601	JX843524	NR_111799	CBS:133260	VIC 31417			ex-holotype culture of Claviradulomyces xylopiae
352	Ewald Groenewald	Homortomyces combreti	complete ITS1_5.8S_ITS2	Yes	Eukaryota; Fungi; Dikarya; Ascomycota; Pezizomycotina; Dothideomycetes; Dothideomycetes incertae sedis; Homortomyces	Homortomyces combreti	1262403	JX517281		CBS:132555	CPC 19808			ex-holotype culture of Homortomyces combreti
353		Leucoagaricus variicolor	complete ITS1_5.8S_ITS2		Eukaryota; Fungi; Dikarya; Basidiomycota; Agaricomycotina; Agaricomycetes; Agaricomycetidae; Agaricales; Agaricaceae; Leucoagaricus	Leucoagaricus variicolor	1266457	JX880030					AH:40328	holotype of Leucoagaricus variicolor	1
354		Lepraria oxybapha	complete ITS1_5.8S_ITS2	Yes	Eukaryota; Fungi; Dikarya; Ascomycota; Pezizomycotina; Lecanoromycetes; Lecanoromycetidae; Lecanorales; Lecanorineae; Stereocaulaceae; mitosporic Stereocaulaceae; Lepraria	Lepraria oxybapha	1225178	JQ627125			NY1032;Lendemer 25637		NY:1217271	holotype of Lepraria oxybapha
356		Phylloporus rubiginosus	complete ITS1_5.8S_ITS2		Eukaryota; Fungi; Dikarya; Basidiomycota; Agaricomycotina; Agaricomycetes; Agaricomycetidae; Boletales; Boletineae; Boletaceae; Phylloporus	Phylloporus rubiginosus	1143319	JQ003645			MAN117		NY:1491248	isotype of Phylloporus rubiginosus
357		Phylloporus dimorphus	complete ITS1_5.8S_ITS2	Yes	Eukaryota; Fungi; Dikarya; Basidiomycota; Agaricomycotina; Agaricomycetes; Agaricomycetidae; Boletales; Boletineae; Boletaceae; Phylloporus	Phylloporus dimorphus	1143316	JQ003648			MAN128		NY:1491201	isotype of Phylloporus dimorphus
358		Phylloporus castanopsidis	complete ITS1_5.8S_ITS2	Yes	Eukaryota; Fungi; Dikarya; Basidiomycota; Agaricomycotina; Agaricomycetes; Agaricomycetidae; Boletales; Boletineae; Boletaceae; Phylloporus	Phylloporus castanopsidis	1143314	JQ003642			MAN104		NY:1491225	isotype of Phylloporus castanopsidis
359	UBC / Nicolas Feau	Tuber panzhihuanense	complete ITS1_5.8S_ITS2	Yes	Eukaryota; Fungi; Dikarya; Ascomycota; Pezizomycotina; Pezizomycetes; Pezizales; Tuberaceae; Tuber	Tuber panzhihuanense	1263265	JQ978648			DXJ267		HKAS:72015	holotype of Tuber panzhihuanense
361	Cathie Aime	Clavulina craterelloides	only 5.8S_ITS2 complete, ITS1 partial		Eukaryota; Fungi; Dikarya; Basidiomycota; Agaricomycotina; Agaricomycetes; Cantharellales; Clavulinaceae; Clavulina	Clavulina craterelloides	257365	JQ911749			TH8234		BRG:TH8234	holotype of Clavulina craterelloides	2
362		Rasamsonia aegroticola	only 5.8S complete, ITS1&2 partial	Yes	Eukaryota; Fungi; Dikarya; Ascomycota; Pezizomycotina; Eurotiomycetes; Eurotiomycetidae; Eurotiales; Trichocomaceae; Rasamsonia	Rasamsonia aegroticola	1233418	GU165728	NR_111447	IHEM:22641	IHEM 22641			ex-holotype culture of Rasamsonia aegroticola
363		Rasamsonia piperina	complete ITS1_5.8S_ITS2	Yes	Eukaryota; Fungi; Dikarya; Ascomycota; Pezizomycotina; Eurotiomycetes; Eurotiomycetidae; Eurotiales; Trichocomaceae; Rasamsonia	Rasamsonia piperina	1233419	JX272968		CBS:408.73	CBS 408.73			ex-holotype culture of Rasamsonia piperina
364	Soili Stenroos	Circinaria gyrosa	only 5.8S complete, ITS1&2 partial		Eukaryota; Fungi; Dikarya; Ascomycota; Pezizomycotina; Lecanoromycetes; Ostropomycetidae; Pertusariales; Megasporaceae; Circinaria	Circinaria gyrosa	1263877	JQ797540			MS84		personal:M. Sohrabi 10085	isotype of Circinaria gyrosa
365	Soili Stenroos	Circinaria rostamii	only 5.8S complete, ITS1&2 partial		Eukaryota; Fungi; Dikarya; Ascomycota; Pezizomycotina; Lecanoromycetes; Ostropomycetidae; Pertusariales; Megasporaceae; Circinaria	Circinaria rostamii	1263880	JQ797527			MS55		IRAN:14442;personal:M. Sohrabi 10212	holotype of Circinaria rostamii
366	Kare Liimatainen	Cortinarius grosmorneensis	complete ITS1_5.8S_ITS2		Eukaryota; Fungi; Dikarya; Basidiomycota; Agaricomycotina; Agaricomycetes; Agaricomycetidae; Agaricales; Cortinariaceae; Cortinarius	Cortinarius grosmorneensis	1245903	JQ746596			TN07-227		H:TN07-227	holotype of Cortinarius grosmorneensis
367	Kare Liimatainen	Cortinarius aavae	complete ITS1_5.8S_ITS2		Eukaryota; Fungi; Dikarya; Basidiomycota; Agaricomycotina; Agaricomycetes; Agaricomycetidae; Agaricales; Cortinariaceae; Cortinarius	Cortinarius aavae	1245891	JQ746601			TN10-166		H:TN10-166	holotype of Cortinarius aavae
368	Kare Liimatainen	Cortinarius brunneocalcarius	complete ITS1_5.8S_ITS2		Eukaryota; Fungi; Dikarya; Basidiomycota; Agaricomycotina; Agaricomycetes; Agaricomycetidae; Agaricales; Cortinariaceae; Cortinarius	Cortinarius brunneocalcarius	1245894	JQ746602			TN10-150		H:TN10-150	holotype of Cortinarius brunneocalcarius	1
369	Kare Liimatainen	Cortinarius brunneotinctus	only 5.8S complete, ITS1&2 partial	Yes	Eukaryota; Fungi; Dikarya; Basidiomycota; Agaricomycotina; Agaricomycetes; Agaricomycetidae; Agaricales; Cortinariaceae; Cortinarius	Cortinarius brunneotinctus	1245895	JQ746604			TN10-018		H:TN10-018	holotype of Cortinarius brunneotinctus
370	Tuula Niskanen	Cortinarius subfloccopus	complete ITS1_5.8S_ITS2	Yes	Eukaryota; Fungi; Dikarya; Basidiomycota; Agaricomycotina; Agaricomycetes; Agaricomycetidae; Agaricales; Cortinariaceae; Cortinarius	Cortinarius subfloccopus	1245908	JQ746607			TN05-062		H:TN05-062	holotype of Cortinarius subfloccopus	3
371	Kare Liimatainen	Cortinarius floccopus	complete ITS1_5.8S_ITS2		Eukaryota; Fungi; Dikarya; Basidiomycota; Agaricomycotina; Agaricomycetes; Agaricomycetidae; Agaricales; Cortinariaceae; Cortinarius	Cortinarius floccopus	1245898	JQ746616			GK432472		G:G00052633	holotype of Cortinarius floccopus	1
372		Tubariomyces similis	complete ITS1_5.8S_ITS2		Eukaryota; Fungi; Dikarya; Basidiomycota; Agaricomycotina; Agaricomycetes; Agaricomycetidae; Agaricales; Inocybaceae; Tubariomyces	Tubariomyces similis	1266062	JX244264					MCVE:27371	holotype of Tubariomyces similis
373		Talaromyces amestolkiae	only 5.8S_ITS2 complete, ITS1 partial	Yes	Eukaryota; Fungi; Dikarya; Ascomycota; Pezizomycotina; Eurotiomycetes; Eurotiomycetidae; Eurotiales; Trichocomaceae; Talaromyces	Talaromyces amestolkiae	1196081	JX315660		CBS:132696	DTO 179F5		CBS:H-21050	ex-holotype culture of Talaromyces amestolkiae
374		Talaromyces stollii	only 5.8S_ITS2 complete, ITS1 partial	Yes	Eukaryota; Fungi; Dikarya; Ascomycota; Pezizomycotina; Eurotiomycetes; Eurotiomycetidae; Eurotiales; Trichocomaceae; Talaromyces	Talaromyces stollii	1266822	JX315674	NR_111781	CBS:408.93	CBS 408.93			ex-holotype culture of Talaromyces stollii
376		Talaromyces aculeatus	complete ITS1_5.8S_ITS2	Yes	Eukaryota; Fungi; Dikarya; Ascomycota; Pezizomycotina; Eurotiomycetes; Eurotiomycetidae; Eurotiales; Trichocomaceae; Talaromyces	Talaromyces aculeatus	36649	JN899378	NR_103679	CBS:289.48	CBS 289.48			ex-neotype culture of Penicillium aculeatum
377		Talaromyces apiculatus	complete ITS1_5.8S_ITS2	Yes	Eukaryota; Fungi; Dikarya; Ascomycota; Pezizomycotina; Eurotiomycetes; Eurotiomycetidae; Eurotiales; Trichocomaceae; Talaromyces	Talaromyces apiculatus	1131640	JN899375		CBS:312.59	CBS 312.59			ex-holotype culture of Penicillium aculeatum var. apiculatum
378		Talaromyces allahabadensis	only 5.8S complete, ITS1&2 partial	Yes	Eukaryota; Fungi; Dikarya; Ascomycota; Pezizomycotina; Eurotiomycetes; Eurotiomycetidae; Eurotiales; Trichocomaceae; Talaromyces	Talaromyces allahabadensis	1131641	JN899345	NR_111687	CBS:453.93	CBS 453.93			ex-holotype culture of Penicillium allahabadense	1
379		Talaromyces aurantiacus	complete ITS1_5.8S_ITS2	Yes	Eukaryota; Fungi; Dikarya; Ascomycota; Pezizomycotina; Eurotiomycetes; Eurotiomycetidae; Eurotiales; Trichocomaceae; Talaromyces	Talaromyces aurantiacus	1131642	JN899380	NR_103681	CBS:314.59	CBS 314.59			ex-holotype culture of Penicillium aurantiacum
380		Talaromyces brunneus	only 5.8S_ITS2 complete, ITS1 partial		Eukaryota; Fungi; Dikarya; Ascomycota; Pezizomycotina; Eurotiomycetes; Eurotiomycetidae; Eurotiales; Trichocomaceae; Talaromyces	Talaromyces brunneus	1131644	JN899365	NR_111688	CBS:227.60	CBS 227.60			ex-holotype culture of Penicillium brunneum
381		Talaromyces calidicanius	complete ITS1_5.8S_ITS2	Yes	Eukaryota; Fungi; Dikarya; Ascomycota; Pezizomycotina; Eurotiomycetes; Eurotiomycetidae; Eurotiales; Trichocomaceae; Talaromyces	Talaromyces calidicanius	1074831	JN899319	NR_103665	CBS:112002	CBS 112002			ex-holotype culture of Penicillium calidicanium
382		Talaromyces coalescens	complete ITS1_5.8S_ITS2	Yes	Eukaryota; Fungi; Dikarya; Ascomycota; Pezizomycotina; Eurotiomycetes; Eurotiomycetidae; Eurotiales; Trichocomaceae; Talaromyces	Talaromyces coalescens	1131645	JN899366		CBS:103.83	CBS 103.83			ex-holotype culture of Penicillium coalescens	1
384		Talaromyces diversus	complete ITS1_5.8S_ITS2	Yes	Eukaryota; Fungi; Dikarya; Ascomycota; Pezizomycotina; Eurotiomycetes; Eurotiomycetidae; Eurotiales; Trichocomaceae; Talaromyces	Talaromyces diversus	128434	JN899341	NR_103669	CBS:320.48	CBS 320.48			ex-holotype culture of Penicillium diversum
385		Talaromyces duclauxii	complete ITS1_5.8S_ITS2	Yes	Eukaryota; Fungi; Dikarya; Ascomycota; Pezizomycotina; Eurotiomycetes; Eurotiomycetidae; Eurotiales; Trichocomaceae; Talaromyces	Talaromyces duclauxii	29842	JN899342		CBS:322.48	CBS 322.48			ex-holotype culture of Talaromyces duclauxii
386		Talaromyces echinosporus	complete ITS1_5.8S_ITS2	Yes	Eukaryota; Fungi; Dikarya; Ascomycota; Pezizomycotina; Eurotiomycetes; Eurotiomycetidae; Eurotiales; Trichocomaceae; Talaromyces	Talaromyces echinosporus	1131647	JN899363		CBS:293.62	CBS 293.62			ex-holotype culture of Penicillium echinosporum
387		Talaromyces erythromellis	complete ITS1_5.8S_ITS2	Yes	Eukaryota; Fungi; Dikarya; Ascomycota; Pezizomycotina; Eurotiomycetes; Eurotiomycetidae; Eurotiales; Trichocomaceae; Talaromyces	Talaromyces erythromellis	861507	JN899383		CBS:644.80	CBS 644.80			ex-holotype culture of Penicillium erythromellis
388		Talaromyces funiculosus	complete ITS1_5.8S_ITS2	Yes	Eukaryota; Fungi; Dikarya; Ascomycota; Pezizomycotina; Eurotiomycetes; Eurotiomycetidae; Eurotiales; Trichocomaceae; Talaromyces	Talaromyces funiculosus	28572	JN899377	NR_103678	CBS:272.86	CBS 272.86			ex-neotype culture of Penicillium funiculosum
389		Talaromyces islandicus	complete ITS1_5.8S_ITS2	Yes	Eukaryota; Fungi; Dikarya; Ascomycota; Pezizomycotina; Eurotiomycetes; Eurotiomycetidae; Eurotiales; Trichocomaceae; Talaromyces	Talaromyces islandicus	28573	JN899318	NR_103664	CBS:338.48	CBS 338.48			ex-neotype culture of Penicillium islandicum
390		Talaromyces loliensis	complete ITS1_5.8S_ITS2	Yes	Eukaryota; Fungi; Dikarya; Ascomycota; Pezizomycotina; Eurotiomycetes; Eurotiomycetidae; Eurotiales; Trichocomaceae; Talaromyces	Talaromyces loliensis	861508	JN899379	NR_103680	CBS:643.80	CBS 643.80			ex-holotype culture of Penicillium loliense
391		Talaromyces marneffei	complete ITS1_5.8S_ITS2	Yes	Eukaryota; Fungi; Dikarya; Ascomycota; Pezizomycotina; Eurotiomycetes; Eurotiomycetidae; Eurotiales; Trichocomaceae; Talaromyces	Talaromyces marneffei	37727	JN899344	NR_103671	CBS:388.87	CBS 388.87			ex-holotype culture of Penicillium marneffei
392		Talaromyces minioluteus	complete ITS1_5.8S_ITS2	Yes	Eukaryota; Fungi; Dikarya; Ascomycota; Pezizomycotina; Eurotiomycetes; Eurotiomycetidae; Eurotiales; Trichocomaceae; Talaromyces	Talaromyces minioluteus	28574	JN899346		CBS:642.68	CBS 642.68			ex-holotype culture of Penicillium minioluteum
395		Talaromyces phialosporus	complete ITS1_5.8S_ITS2	Yes	Eukaryota; Fungi; Dikarya; Ascomycota; Pezizomycotina; Eurotiomycetes; Eurotiomycetidae; Eurotiales; Trichocomaceae; Talaromyces	Talaromyces phialosporus	128439	JN899340		CBS:233.60	CBS 233.60			ex-holotype culture of Penicillium phialosporum
396		Talaromyces piceus	only 5.8S complete, ITS1&2 partial	Yes	Eukaryota; Fungi; Dikarya; Ascomycota; Pezizomycotina; Eurotiomycetes; Eurotiomycetidae; Eurotiales; Trichocomaceae; Talaromyces	Talaromyces piceus	153982	JN899370	NR_111690	CBS:361.48	CBS 361.48			ex-holotype culture of Penicillium piceum
397		Talaromyces pinophilus	only 5.8S complete, ITS1&2 partial	Yes	Eukaryota; Fungi; Dikarya; Ascomycota; Pezizomycotina; Eurotiomycetes; Eurotiomycetidae; Eurotiales; Trichocomaceae; Talaromyces	Talaromyces pinophilus	128442	JN899382	NR_111691	CBS:631.66	CBS 631.66			ex-neotype culture of Penicillium pinophilum	1
398		Talaromyces pittii	complete ITS1_5.8S_ITS2	Yes	Eukaryota; Fungi; Dikarya; Ascomycota; Pezizomycotina; Eurotiomycetes; Eurotiomycetidae; Eurotiales; Trichocomaceae; Talaromyces	Talaromyces pittii	128440	JN899325	NR_103667	CBS:139.84	CBS 139.84			ex-holotype culture of Penicillium pittii
400		Talaromyces proteolyticus	complete ITS1_5.8S_ITS2	Yes	Eukaryota; Fungi; Dikarya; Ascomycota; Pezizomycotina; Eurotiomycetes; Eurotiomycetidae; Eurotiales; Trichocomaceae; Talaromyces	Talaromyces proteolyticus	1131652	JN899387	NR_103685	CBS:303.67	CBS 303.67			ex-holotype culture of Penicillium proteolyticum
402		Talaromyces purpurogenus	complete ITS1_5.8S_ITS2	Yes	Eukaryota; Fungi; Dikarya; Ascomycota; Pezizomycotina; Eurotiomycetes; Eurotiomycetidae; Eurotiales; Trichocomaceae; Talaromyces	Talaromyces purpurogenus	1266744	JN899372		CBS:286.36	CBS 286.36			ex-holotype culture of Penicillium purpurogenum
403		Talaromyces rademirici	complete ITS1_5.8S_ITS2	Yes	Eukaryota; Fungi; Dikarya; Ascomycota; Pezizomycotina; Eurotiomycetes; Eurotiomycetidae; Eurotiales; Trichocomaceae; Talaromyces	Talaromyces rademirici	1131653	JN899386	NR_103684	CBS:140.84	CBS 140.84			ex-holotype culture of Penicillium rademirici
404		Talaromyces radicus	complete ITS1_5.8S_ITS2	Yes	Eukaryota; Fungi; Dikarya; Ascomycota; Pezizomycotina; Eurotiomycetes; Eurotiomycetidae; Eurotiales; Trichocomaceae; Talaromyces	Talaromyces radicus	228353	JN899324	NR_103666	CBS:100489	CBS 100489			ex-holotype culture of Penicillium radicum
405		Talaromyces rubicundus	complete ITS1_5.8S_ITS2	Yes	Eukaryota; Fungi; Dikarya; Ascomycota; Pezizomycotina; Eurotiomycetes; Eurotiomycetidae; Eurotiales; Trichocomaceae; Talaromyces	Talaromyces rubicundus	1131654	JN899384	NR_103682	CBS:342.59	CBS 342.59			ex-holotype culture of Penicillium rubicundum
406		Talaromyces rugulosus	complete ITS1_5.8S_ITS2	Yes	Eukaryota; Fungi; Dikarya; Ascomycota; Pezizomycotina; Eurotiomycetes; Eurotiomycetidae; Eurotiales; Trichocomaceae; Talaromyces	Talaromyces rugulosus	121627	JN899374	NR_103676	CBS:371.48	CBS 371.48			ex-holotype culture of Penicillium rugulosum
407		Talaromyces siamensis	complete ITS1_5.8S_ITS2	Yes	Eukaryota; Fungi; Dikarya; Ascomycota; Pezizomycotina; Eurotiomycetes; Eurotiomycetidae; Eurotiales; Trichocomaceae; Talaromyces	Talaromyces siamensis	128436	JN899385	NR_103683	CBS:475.88	CBS 475.88			ex-holotype culture of Penicillium siamense
408		Talaromyces variabilis	complete ITS1_5.8S_ITS2	Yes	Eukaryota; Fungi; Dikarya; Ascomycota; Pezizomycotina; Eurotiomycetes; Eurotiomycetidae; Eurotiales; Trichocomaceae; Talaromyces	Talaromyces variabilis	28576	JN899343	NR_103670	CBS:385.48	CBS 385.48			ex-neotype culture of Penicillium variabile
409		Talaromyces varians	only ITS1_5.8S complete, ITS2 partial	Yes	Eukaryota; Fungi; Dikarya; Ascomycota; Pezizomycotina; Eurotiomycetes; Eurotiomycetidae; Eurotiales; Trichocomaceae; Talaromyces	Talaromyces varians	1131668	JN899368	NR_111689	CBS:386.48	CBS 386.48			ex-holotype culture of Penicillium varians
410		Talaromyces verruculosus	complete ITS1_5.8S_ITS2	Yes	Eukaryota; Fungi; Dikarya; Ascomycota; Pezizomycotina; Eurotiomycetes; Eurotiomycetidae; Eurotiales; Trichocomaceae; Talaromyces	Talaromyces verruculosus	198730	JN899367	NR_103675	CBS:388.48	CBS 388.48			ex-neotype culture of Penicillium verruculosum
411	Ewald Groenewald	Pseudoveronaea ellipsoidea	only 5.8S_ITS2 complete, ITS1 partial	Yes	Eukaryota; Fungi; Dikarya; Ascomycota; Pezizomycotina; Dothideomycetes; Dothideomycetidae; Capnodiales; Dissoconiaceae; Pseudoveronaea	Pseudoveronaea ellipsoidea	1194245	FJ425205	NR_111367	CBS:132085	MI3_34F1a			ex-holotype culture of Pseudoveronaea ellipsoidea
412	Ewald Groenewald	Pseudoveronaea obclavata	only 5.8S complete, ITS1&2 partial		Eukaryota; Fungi; Dikarya; Ascomycota; Pezizomycotina; Dothideomycetes; Dothideomycetidae; Capnodiales; Dissoconiaceae; Pseudoveronaea	Pseudoveronaea obclavata	1194244	AY598877	NR_111168	CBS:132086	UIF3			ex-holotype culture of Pseudoveronaea obclavata
413	Ewald Groenewald	Ramichloridium cucurbitae	only 5.8S complete, ITS1&2 partial	Yes	Eukaryota; Fungi; Dikarya; Ascomycota; Pezizomycotina; Dothideomycetes; Dothideomycetidae; Capnodiales; Dissoconiaceae; Ramichloridium	Ramichloridium cucurbitae	1194241	JQ622087		CBS:132087;CPC:19423	BHF50a3			ex-holotype culture of Ramichloridium cucurbitae
414	Ewald Groenewald	Ramichloridium luteum	only 5.8S complete, ITS1&2 partial	Yes	Eukaryota; Fungi; Dikarya; Ascomycota; Pezizomycotina; Dothideomycetes; Dothideomycetidae; Capnodiales; Dissoconiaceae; Ramichloridium	Ramichloridium luteum	508918	EU329730		CBS:132088;CPC:18961	ZXRSD2			ex-holotype culture of Ramichloridium luteum
415		Ramichloridium punctatum	only 5.8S complete, ITS1&2 partial	Yes	Eukaryota; Fungi; Dikarya; Ascomycota; Pezizomycotina; Dothideomycetes; Dothideomycetidae; Capnodiales; Dissoconiaceae; Ramichloridium	Ramichloridium punctatum	1194240	JQ622086		CBS:132090;CPC:18974	BHE35b1			ex-holotype culture of Ramichloridium punctatum
416	Ewald Groenewald	Zasmidium angulare	only 5.8S complete, ITS1&2 partial	Yes	Eukaryota; Fungi; Dikarya; Ascomycota; Pezizomycotina; Dothideomycetes; Dothideomycetidae; Capnodiales; Mycosphaerellaceae; Zasmidium	Zasmidium angulare	1194242	JQ622088		CBS:132094;CPC:19042	GA2 27B1a			ex-holotype culture of Zasmidium angulare
417		Diversispora aurantia	complete ITS1_5.8S_ITS2		Eukaryota; Fungi; Glomeromycota; Glomeromycetes; Diversisporales; Diversisporaceae; Diversispora	Diversispora aurantia	297283	AJ849468					personal:J Blaszkowski:2444	holotype of Diversispora aurantia
418		Acaulospora entreriana	complete ITS1_5.8S_ITS2		Eukaryota; Fungi; Glomeromycota; Glomeromycetes; Diversisporales; Acaulosporaceae; Acaulospora	Acaulospora entreriana	937378	FR750168			Att1541-1	MK095-1	E:W5476	type of Acaulospora entreriana
419		Acaulospora entreriana	complete ITS1_5.8S_ITS2		Eukaryota; Fungi; Glomeromycota; Glomeromycetes; Diversisporales; Acaulosporaceae; Acaulospora	Acaulospora entreriana	937378	FR750169			Att1541-1	MK095-2	E:W5476	type of Acaulospora entreriana
420		Acaulospora entreriana	complete ITS1_5.8S_ITS2		Eukaryota; Fungi; Glomeromycota; Glomeromycetes; Diversisporales; Acaulosporaceae; Acaulospora	Acaulospora entreriana	937378	FR750170			Att1541-1	MK095-3	E:W5476	type of Acaulospora entreriana
421		Acaulospora entreriana	complete ITS1_5.8S_ITS2		Eukaryota; Fungi; Glomeromycota; Glomeromycetes; Diversisporales; Acaulosporaceae; Acaulospora	Acaulospora entreriana	937378	FR750171			Att1541-1	MK095-4	E:W5476	type of Acaulospora entreriana
422		Acaulospora entreriana	complete ITS1_5.8S_ITS2		Eukaryota; Fungi; Glomeromycota; Glomeromycetes; Diversisporales; Acaulosporaceae; Acaulospora	Acaulospora entreriana	937378	FR750172			Att1541-1	MK095-5	E:W5476	type of Acaulospora entreriana
423		Acaulospora entreriana	complete ITS1_5.8S_ITS2		Eukaryota; Fungi; Glomeromycota; Glomeromycetes; Diversisporales; Acaulosporaceae; Acaulospora	Acaulospora entreriana	937378	FR750173			Att1541-1	MK095-6	E:W5476	type of Acaulospora entreriana
424		Acaulospora colombiana	complete ITS1_5.8S_ITS2		Eukaryota; Fungi; Glomeromycota; Glomeromycetes; Diversisporales; Acaulosporaceae; Acaulospora	Acaulospora colombiana	27376	FR750063		INVAM:CL356	Att1476-8;CIAT C-10;INVAM CL356	CK086-4	E:W5795	type of Entrophospora colombiana
425		Acaulospora spinosa	complete ITS1_5.8S_ITS2		Eukaryota; Fungi; Glomeromycota; Glomeromycetes; Diversisporales; Acaulosporaceae; Acaulospora	Acaulospora spinosa	27374	FR750151			Att165-9	MK038-11	E:W3574	type of Acaulospora spinosa
426		Acaulospora spinosa	complete ITS1_5.8S_ITS2		Eukaryota; Fungi; Glomeromycota; Glomeromycetes; Diversisporales; Acaulosporaceae; Acaulospora	Acaulospora spinosa	27374	FR750152			Att165-9	MK038-15	E:W3574	type of Acaulospora spinosa
427		Acaulospora spinosa	complete ITS1_5.8S_ITS2		Eukaryota; Fungi; Glomeromycota; Glomeromycetes; Diversisporales; Acaulosporaceae; Acaulospora	Acaulospora spinosa	27374	FR750153			Att165-9	MK038-32	E:W3574	type of Acaulospora spinosa
428		Acaulospora spinosa	complete ITS1_5.8S_ITS2		Eukaryota; Fungi; Glomeromycota; Glomeromycetes; Diversisporales; Acaulosporaceae; Acaulospora	Acaulospora spinosa	27374	FR750154			Att165-9	MK038-41	E:W3574	type of Acaulospora spinosa
429		Acaulospora spinosa	complete ITS1_5.8S_ITS2		Eukaryota; Fungi; Glomeromycota; Glomeromycetes; Diversisporales; Acaulosporaceae; Acaulospora	Acaulospora spinosa	27374	FR750155			Att165-9	MK038-42	E:W3574	type of Acaulospora spinosa
430		Acaulospora spinosa	complete ITS1_5.8S_ITS2		Eukaryota; Fungi; Glomeromycota; Glomeromycetes; Diversisporales; Acaulosporaceae; Acaulospora	Acaulospora spinosa	27374	FR750156			Att165-9	MK038-44	E:W3574	type of Acaulospora spinosa
431		Diplodia corticola	complete ITS1_5.8S_ITS2	Yes	Eukaryota; Fungi; Dikarya; Ascomycota; Pezizomycotina; Dothideomycetes; Dothideomycetes incertae sedis; Botryosphaeriales; Botryosphaeriaceae; mitosporic Botryosphaeriaceae; Diplodia	Diplodia corticola	236234	AY259100	NR_111152	CBS:112549	CBS 112549			ex-type culture of Botryosphaeria corticola
432		Diplodia africana	only 5.8S_ITS2 complete, ITS1 partial	Yes	Eukaryota; Fungi; Dikarya; Ascomycota; Pezizomycotina; Dothideomycetes; Dothideomycetes incertae sedis; Botryosphaeriales; Botryosphaeriaceae; mitosporic Botryosphaeriaceae; Diplodia	Diplodia africana	448126	EF445343		CBS:120835;STEU:5908	STE-U 5908			ex-type culture of Diplodia africana
434		Diplodia cupressi	complete ITS1_5.8S_ITS2	Yes	Eukaryota; Fungi; Dikarya; Ascomycota; Pezizomycotina; Dothideomycetes; Dothideomycetes incertae sedis; Botryosphaeriales; Botryosphaeriaceae; mitosporic Botryosphaeriaceae; Diplodia	Diplodia cupressi	400389	DQ458893	NR_111219	CBS:168.87	CBS 168.87			ex-type culture of Diplodia cupressi
435		Diplodia intermedia	only 5.8S complete, ITS1&2 partial	Yes	Eukaryota; Fungi; Dikarya; Ascomycota; Pezizomycotina; Dothideomycetes; Dothideomycetes incertae sedis; Botryosphaeriales; Botryosphaeriaceae; mitosporic Botryosphaeriaceae; Diplodia	Diplodia intermedia	856260	GQ923858	NR_111445	CBS:124462	CAP273			ex-holotype culture of Diplodia intermedia
436		Diplodia malorum	only 5.8S complete, ITS1&2 partial	Yes	Eukaryota; Fungi; Dikarya; Ascomycota; Pezizomycotina; Dothideomycetes; Dothideomycetes incertae sedis; Botryosphaeriales; Botryosphaeriaceae; mitosporic Botryosphaeriaceae; Diplodia	Diplodia malorum	856253	GQ923865	NR_111446	CBS:124130	CAP271			ex-type culture of Diplodia malorum
437		Diplodia olivarum	only 5.8S complete, ITS1&2 partial	Yes	Eukaryota; Fungi; Dikarya; Ascomycota; Pezizomycotina; Dothideomycetes; Dothideomycetes incertae sedis; Botryosphaeriales; Botryosphaeriaceae; mitosporic Botryosphaeriaceae; Diplodia	Diplodia olivarum	512795	EU392302	NR_111316	CBS:121887	CBS 121887			ex-type culture of Diplodia olivarum
438		Diplodia rosulata	complete ITS1_5.8S_ITS2	Yes	Eukaryota; Fungi; Dikarya; Ascomycota; Pezizomycotina; Dothideomycetes; Dothideomycetes incertae sedis; Botryosphaeriales; Botryosphaeriaceae; mitosporic Botryosphaeriaceae; Diplodia	Diplodia rosulata	345083	EU430265	NR_111318	CBS:116470	CBS 116470			ex-holotype culture of Diplodia rosulata
440		Diplodia seriata	complete ITS1_5.8S_ITS2	Yes	Eukaryota; Fungi; Dikarya; Ascomycota; Pezizomycotina; Dothideomycetes; Dothideomycetes incertae sedis; Botryosphaeriales; Botryosphaeriaceae; mitosporic Botryosphaeriaceae; Diplodia	Diplodia seriata	420778	AY259094	NR_111151	CBS:112555	CBS 112555			ex-epitype culture of Diplodia seriata
441		Diplodia pseudoseriata	complete ITS1_5.8S_ITS2	Yes	Eukaryota; Fungi; Dikarya; Ascomycota; Pezizomycotina; Dothideomycetes; Dothideomycetes incertae sedis; Botryosphaeriales; Botryosphaeriaceae; mitosporic Botryosphaeriaceae; Diplodia	Diplodia pseudoseriata	575641	EU080927		CBS:124906	UY788			ex-type culture of Diplodia pseudoseriata
442		Diplodia alatafructa	complete ITS1_5.8S_ITS2	Yes	Eukaryota; Fungi; Dikarya; Ascomycota; Pezizomycotina; Dothideomycetes; Dothideomycetes incertae sedis; Botryosphaeriales; Botryosphaeriaceae; mitosporic Botryosphaeriaceae; Diplodia	Diplodia alatafructa	1094891	FJ888460	NR_111416	CBS:124931	CMW 22627			ex-type culture of Diplodia alatafructa
443	Ewald Groenewald	Collophora hispanica	only 5.8S_ITS2 complete, ITS1 partial	Yes	Eukaryota; Fungi; Dikarya; Ascomycota; Pezizomycotina; Leotiomycetes; Leotiomycetes incertae sedis; Collophora	Collophora hispanica	1206812	JN808841	NR_111680	CBS:128568	Col-4;CBS 128568			ex-holotype culture of Collophora hispanica
444	Peter Johnston	Collophora africana	only 5.8S_ITS2 complete, ITS1 partial	Yes	Eukaryota; Fungi; Dikarya; Ascomycota; Pezizomycotina; Leotiomycetes; Leotiomycetes incertae sedis; Collophora	Collophora africana	744430	GQ154570		CBS:120872;STEU:6113	CBS 120872;STE-U 6113			ex-holotype culture of Collophora africana
445	Peter Johnston	Collophora rubra	only 5.8S_ITS2 complete, ITS1 partial	Yes	Eukaryota; Fungi; Dikarya; Ascomycota; Pezizomycotina; Leotiomycetes; Leotiomycetes incertae sedis; Collophora	Collophora rubra	744434	GQ154547		CBS:120873;STEU:6109	CBS 120873;STE-U 6109			ex-holotype culture of Collophora rubra
446	Peter Johnston	Collophora paarla	only 5.8S_ITS2 complete, ITS1 partial	Yes	Eukaryota; Fungi; Dikarya; Ascomycota; Pezizomycotina; Leotiomycetes; Leotiomycetes incertae sedis; Collophora	Collophora paarla	744432	GQ154586		CBS:120877;STEU:6114	CBS 120877;STE-U 6114			ex-holotype culture of Collophora paarla
447		Hebeloma griseopruinatum	complete ITS1_5.8S_ITS2		Eukaryota; Fungi; Dikarya; Basidiomycota; Agaricomycotina; Agaricomycetes; Agaricomycetidae; Agaricales; Cortinariaceae; Hebeloma	Hebeloma griseopruinatum	1271821	JQ751183					C:JHC09-174;BR<BEL>:BR-MYCO 169128-57	type of Hebeloma griseopruinatum
448		Hebeloma parvicystidiatum	complete ITS1_5.8S_ITS2		Eukaryota; Fungi; Dikarya; Basidiomycota; Agaricomycotina; Agaricomycetes; Agaricomycetidae; Agaricales; Cortinariaceae; Hebeloma	Hebeloma parvicystidiatum	1271822	JQ751205					C:JV06-1090;BR<BEL>:BR-MYCO 169127-56	type of Hebeloma parvicystidiatum	1
449		Hebeloma plesiocistum	complete ITS1_5.8S_ITS2		Eukaryota; Fungi; Dikarya; Basidiomycota; Agaricomycotina; Agaricomycetes; Agaricomycetidae; Agaricales; Cortinariaceae; Hebeloma	Hebeloma plesiocistum	1271818	EU570170					LIP:JVG1021214	type of Hebeloma plesiocistum
450		Hebeloma theobrominum	complete ITS1_5.8S_ITS2		Eukaryota; Fungi; Dikarya; Basidiomycota; Agaricomycotina; Agaricomycetes; Agaricomycetidae; Agaricales; Cortinariaceae; Hebeloma	Hebeloma theobrominum	535364	JX275966					ROHB:925 LQ	type of Hebeloma theobrominum
452		Hebeloma vesterholtii	complete ITS1_5.8S_ITS2		Eukaryota; Fungi; Dikarya; Basidiomycota; Agaricomycotina; Agaricomycetes; Agaricomycetidae; Agaricales; Cortinariaceae; Hebeloma	Hebeloma vesterholtii	693069	FJ816627					BR<BEL>:BR5020166528762;personal:Beker:1000133	type of Hebeloma vesterholtii
453		Botryosphaeria scharifii	only 5.8S_ITS2 complete, ITS1 partial	Yes	Eukaryota; Fungi; Dikarya; Ascomycota; Pezizomycotina; Dothideomycetes; Dothideomycetes incertae sedis; Botryosphaeriales; Botryosphaeriaceae; Botryosphaeria	Botryosphaeria scharifii	1273437	JQ772020	NR_111719	IRAN:1529C	IRAN 1529C			ex-holotype culture of Botryosphaeria scharifii
454	María P. Martín et al.	Pisolithus capsulifer	only 5.8S_ITS2 complete, ITS1 partial	Yes	Eukaryota; Fungi; Dikarya; Basidiomycota; Agaricomycotina; Agaricomycetes; Agaricomycetidae; Boletales; Sclerodermatineae; Pisolithaceae; Pisolithus	Pisolithus capsulifer	936129	FR748135			46PISOLI;Wat.25310;E00290168		E:00290168	epitype of Pisolithus capsulifer
455	María P. Martín et al.	Pisolithus orientalis	only 5.8S_ITS2 complete, ITS1 partial	Yes	Eukaryota; Fungi; Dikarya; Basidiomycota; Agaricomycotina; Agaricomycetes; Agaricomycetidae; Boletales; Sclerodermatineae; Pisolithaceae; Pisolithus	Pisolithus orientalis	936130	FR748148			33PISOLI;BBH:28597		BBH:28597	holotype of Pisolithus orientalis
456		Kazachstania exigua	only 5.8S_ITS2 complete, ITS1 partial	Yes	Eukaryota; Fungi; Dikarya; Ascomycota; Saccharomycotina; Saccharomycetes; Saccharomycetales; Saccharomycetaceae; Kazachstania	Kazachstania exigua	34358	EF568070	NR_111256	CBS:379	WM 789			ex-neotype culture of Saccharomyces exiguus
458		Myxocephala albida	complete ITS1_5.8S_ITS2		Eukaryota; Fungi; Dikarya; Ascomycota; Pezizomycotina; Sordariomycetes; Sordariomycetidae; Sordariomycetidae incertae sedis; Myxocephala	Myxocephala albida	135458	AB671495		CBS:962.87	CBS 962.87			ex-holotype culture of Myxocephala albida
461		Phialocephala trigonospora	complete ITS1_5.8S_ITS2		Eukaryota; Fungi; Dikarya; Ascomycota; mitosporic Ascomycota; Phialocephala	Phialocephala trigonospora	519228	AB671504	NR_103563	CBS:100161	CBS 100161			ex-type culture of Phialocephala trigonospora
462	Peter Johnston	Phialocephala virens	complete ITS1_5.8S_ITS2		Eukaryota; Fungi; Dikarya; Ascomycota; Pezizomycotina; Leotiomycetes; Helotiales; mitosporic Helotiales; Phialocephala	Phialocephala virens	191048	AB671505	NR_103564	CBS:452.92	CBS 452.92			ex-type culture of Phialocephala virens
463		Phialocephala xalapensis	complete ITS1_5.8S_ITS2		Eukaryota; Fungi; Dikarya; Ascomycota; Pezizomycotina; Sordariomycetes; Sordariomycetidae; Ophiostomatales; Ophiostomataceae; mitosporic Ophiostomataceae; Phialocephala	Phialocephala xalapensis	135460	AB671506		CBS:218.86	CBS 218.86			ex-holotype culture of Phialocephala xalapensis
464	Peter Johnston	Pilidium acerinum	complete ITS1_5.8S_ITS2		Eukaryota; Fungi; Dikarya; Ascomycota; Pezizomycotina; Leotiomycetes; Helotiales; mitosporic Helotiales; Pilidium	Pilidium acerinum	266073	AY487091		CBS:736.68	CBS 736.68		BPI:843555	ex-epitype culture of Pilidium acerinum
465	Ewald Groenewald	Ilyonectria torresensis	complete ITS1_5.8S_ITS2		Eukaryota; Fungi; Dikarya; Ascomycota; Pezizomycotina; Sordariomycetes; Hypocreomycetidae; Hypocreales; Nectriaceae; Ilyonectria	Ilyonectria torresensis	1199091	JF735362		CBS:129086	CBS 129086			ex-holotype culture of Ilyonectria torresensis
466		Lepiota geogenia	only 5.8S complete, ITS1&2 partial	Yes	Eukaryota; Fungi; Dikarya; Basidiomycota; Agaricomycotina; Agaricomycetes; Agaricomycetidae; Agaricales; Agaricaceae; Lepiota	Lepiota geogenia	1274378	JX179268					MEL:2358502	holotype of Lepiota geogenia
467	Ewald Groenewald	Ilyonectria novozelandica	complete ITS1_5.8S_ITS2		Eukaryota; Fungi; Dikarya; Ascomycota; Pezizomycotina; Sordariomycetes; Hypocreomycetidae; Hypocreales; Nectriaceae; Ilyonectria	Ilyonectria novozelandica	1079263	JF735334		CBS:113552	CBS 113552			ex-holotype culture of Ilyonectria novozelandica
468	Ewald Groenewald	Ilyonectria cyclaminicola	complete ITS1_5.8S_ITS2		Eukaryota; Fungi; Dikarya; Ascomycota; Pezizomycotina; Sordariomycetes; Hypocreomycetidae; Hypocreales; Nectriaceae; Ilyonectria	Ilyonectria cyclaminicola	1079127	JF735304		CBS:302.93	CBS 302.93			ex-holotype culture of Ilyonectria cyclaminicola
469	Ewald Groenewald	Ilyonectria anthuriicola	complete ITS1_5.8S_ITS2		Eukaryota; Fungi; Dikarya; Ascomycota; Pezizomycotina; Sordariomycetes; Hypocreomycetidae; Hypocreales; Nectriaceae; Ilyonectria	Ilyonectria anthuriicola	1079122	JF735302		CBS:564.95	CBS 564.95			ex-holotype culture of Ilyonectria anthuriicola
470		Exophiala hongkongensis	only 5.8S complete, ITS1&2 partial	Yes	Eukaryota; Fungi; Dikarya; Ascomycota; Pezizomycotina; Eurotiomycetes; Chaetothyriomycetidae; Chaetothyriales; Herpotrichiellaceae; mitosporic Herpotrichiellaceae; Exophiala	Exophiala hongkongensis	1118753	JN625231	NR_111671	HKU:32	HKU 32			ex-holotype culture of Exophiala hongkongensis
472		Phellinus castanopsidis	only 5.8S_ITS2 complete, ITS1 partial	Yes	Eukaryota; Fungi; Dikarya; Basidiomycota; Agaricomycotina; Agaricomycetes; Hymenochaetales; Hymenochaetaceae; Phellinus	Phellinus castanopsidis	1276174	JQ837944			Cui 10153		BJFC:Cui 10153	holotype of Phellinus castanopsidis
473		Antrodia tropica	complete ITS1_5.8S_ITS2	Yes	Eukaryota; Fungi; Dikarya; Basidiomycota; Agaricomycotina; Agaricomycetes; Polyporales; Antrodia	Antrodia tropica	1276180	JQ837939			Cui 6471		BJFC:Cui 6471	holotype of Antrodia tropica
474		Candida tunisiensis	complete ITS1_5.8S_ITS2		Eukaryota; Fungi; Dikarya; Ascomycota; Saccharomycotina; Saccharomycetes; Saccharomycetales; mitosporic Saccharomycetales; Candida	Candida tunisiensis	1183333	JQ612155		CBS:12513	JEY63			ex-holotype culture of Candida tunisiensis
475	Marieka Gryzenhout	Immersiporthe knoxdaviesiana	only 5.8S_ITS2 complete, ITS1 partial	CATTG	Eukaryota; Fungi; Dikarya; Ascomycota; Pezizomycotina; Sordariomycetes; Sordariomycetidae; Diaporthales; Cryphonectriaceae; Immersiporthe	Immersiporthe knoxdaviesiana	1276217	JQ862765		CBS:132862	CMW 37314		PREM:60738	ex-holotype culture of Immersiporthe knoxdaviesiana
476		Ceratocystis chinaeucensis	only 5.8S complete, ITS1&2 partial		Eukaryota; Fungi; Dikarya; Ascomycota; Pezizomycotina; Sordariomycetes; Hypocreomycetidae; Microascales; Ceratocystidaceae; Ceratocystis	Ceratocystis chinaeucensis	1276210	JQ862729		CBS:127185	CMW 24658		PREM:60735	ex-holotype culture of Ceratocystis chinaeucensis
477		Megasporia guangdongensis	only 5.8S complete, ITS1&2 partial		Eukaryota; Fungi; Dikarya; Basidiomycota; Agaricomycotina; Agaricomycetes; Polyporales; Polyporaceae; Megasporia	Megasporia guangdongensis	1168760	JQ314373			Cui 9130		BJFC:Cui 9130	holotype of Megasporia guangdongensis
478		Megasporia hengduanensis	only 5.8S complete, ITS1&2 partial		Eukaryota; Fungi; Dikarya; Basidiomycota; Agaricomycotina; Agaricomycetes; Polyporales; Polyporaceae; Megasporia	Megasporia hengduanensis	1280925	JQ780392			Cui 8076		BJFC:Cui 8076	holotype of Megasporia hengduanensis
479		Megasporoporia bannaensis	only 5.8S complete, ITS1&2 partial		Eukaryota; Fungi; Dikarya; Basidiomycota; Agaricomycotina; Agaricomycetes; Polyporales; Megasporoporia	Megasporoporia bannaensis	1168759	JQ314362			Dai12306		BJFC:Dai 12306	holotype of Megasporoporia bannaensis
480		Megasporoporia minor	only 5.8S complete, ITS1&2 partial		Eukaryota; Fungi; Dikarya; Basidiomycota; Agaricomycotina; Agaricomycetes; Polyporales; Megasporoporia	Megasporoporia minor	1168762	JQ314363			Dai12170		BJFC:Dai 12170	holotype of Megasporoporia minor
481		Megasporoporiella lacerata	only 5.8S complete, ITS1&2 partial		Eukaryota; Fungi; Dikarya; Basidiomycota; Agaricomycotina; Agaricomycetes; Polyporales; Polyporaceae; Megasporoporiella	Megasporoporiella lacerata	1276192	JQ314377			Yuan3880		IFP:Yuan 3880	holotype of Megasporoporiella lacerata
482		Megasporoporiella pseudocavernulosa	only 5.8S complete, ITS1&2 partial		Eukaryota; Fungi; Dikarya; Basidiomycota; Agaricomycotina; Agaricomycetes; Polyporales; Polyporaceae; Megasporoporiella	Megasporoporiella pseudocavernulosa	1276193	JQ314360			Yuan1270		IFP:Yuan 1270	holotype of Megasporoporiella pseudocavernulosa
483		Perenniporiella chaquenia	complete ITS1_5.8S_ITS2	Yes	Eukaryota; Fungi; Dikarya; Basidiomycota; Agaricomycotina; Agaricomycetes; Polyporales; Polyporaceae; Perenniporiella	Perenniporiella chaquenia	644913	FJ411085	NR_111365	MUCL:49758	MUCL 49758			ex-isotype culture of Perenniporiella chaquenia
484		Perenniporia medulla-panis	complete ITS1_5.8S_ITS2	Yes	Eukaryota; Fungi; Dikarya; Basidiomycota; Agaricomycotina; Agaricomycetes; Polyporales; Polyporaceae; Perenniporia	Perenniporia medulla-panis	137755	FJ411087		MUCL:43250	MUCL 43250			ex-isoepitype culture of Perenniporia medulla-panis
485		Abundisporus sclerosetosus	complete ITS1_5.8S_ITS2	Yes	Eukaryota; Fungi; Dikarya; Basidiomycota; Agaricomycotina; Agaricomycetes; Polyporales; Polyporaceae; Abundisporus	Abundisporus sclerosetosus	644900	FJ411101	NR_111366	MUCL:41438	MUCL 41438			ex-holotype culture of Abundisporus sclerosetosus
486		Blastobotrys illinoisensis	only 5.8S complete, ITS1&2 partial		Eukaryota; Fungi; Dikarya; Ascomycota; Saccharomycotina; Saccharomycetes; Saccharomycetales; mitosporic Saccharomycetales; Blastobotrys	Blastobotrys illinoisensis	378048	DQ898169	NR_111227	NRRL:YB-1343	NRRL YB-1343			ex-holotype culture of Blastobotrys illinoisensis
487		Blastobotrys malaysiensis	only 5.8S complete, ITS1&2 partial		Eukaryota; Fungi; Dikarya; Ascomycota; Saccharomycotina; Saccharomycetes; Saccharomycetales; mitosporic Saccharomycetales; Blastobotrys	Blastobotrys malaysiensis	378047	DQ898170	NR_111228	NRRL:Y-6417	NRRL Y-6417			ex-holotype culture of Blastobotrys malaysiensis
488		Trichomonascus ciferrii	only 5.8S_ITS2 complete, ITS1 partial		Eukaryota; Fungi; Dikarya; Ascomycota; Saccharomycotina; Saccharomycetes; Saccharomycetales; Trichomonascaceae; Trichomonascus; Trichomonascus ciferrii complex	Trichomonascus ciferrii	44093	AY493435	NR_111160	CBS:5295	CBS 5295			ex-holotype culture of Trichomonascus ciferrii
490		Sugiyamaella boreocaroliniensis	only 5.8S complete, ITS1&2 partial		Eukaryota; Fungi; Dikarya; Ascomycota; Saccharomycotina; Saccharomycetes; Saccharomycetales; Trichomonascaceae; Sugiyamaella	Sugiyamaella boreocaroliniensis	377600	DQ911448	NR_111234	NRRL:YB-1835	NRRL YB-1835			ex-holotype culture of Sugiyamaella boreocaroliniensis
491		Sugiyamaella bullrunensis	complete ITS1_5.8S_ITS2	Yes	Eukaryota; Fungi; Dikarya; Ascomycota; Saccharomycotina; Saccharomycetes; Saccharomycetales; Trichomonascaceae; Sugiyamaella	Sugiyamaella bullrunensis	796061	HM208602	NR_111543	ATCC:MYA-4660	ATCC MYA-4660			ex-holotype culture of Sugiyamaella bullrunensis
492		Sugiyamaella castrensis	only 5.8S complete, ITS1&2 partial		Eukaryota; Fungi; Dikarya; Ascomycota; Saccharomycotina; Saccharomycetes; Saccharomycetales; Trichomonascaceae; Sugiyamaella	Sugiyamaella castrensis	45535	DQ911441	NR_111229	NRRL:Y-17329	NRRL Y-17329			ex-holotype culture of Sugiyamaella castrensis
493		Sugiyamaella floridensis	only 5.8S complete, ITS1&2 partial		Eukaryota; Fungi; Dikarya; Ascomycota; Saccharomycotina; Saccharomycetes; Saccharomycetales; Trichomonascaceae; Sugiyamaella	Sugiyamaella floridensis	377601	DQ911442	NR_111230	NRRL:YB-3827	NRRL YB-3827			ex-holotype culture of Sugiyamaella floridensis
494		Sugiyamaella grinbergsii	only 5.8S complete, ITS1&2 partial		Eukaryota; Fungi; Dikarya; Ascomycota; Saccharomycotina; Saccharomycetes; Saccharomycetales; Trichomonascaceae; Sugiyamaella	Sugiyamaella grinbergsii	378058	DQ911443	NR_111231	NRRL:Y-27117	NRRL Y-27117			ex-holotype culture of Sugiyamaella grinbergsii
495		Sugiyamaella japonica	only 5.8S complete, ITS1&2 partial		Eukaryota; Fungi; Dikarya; Ascomycota; Saccharomycotina; Saccharomycetes; Saccharomycetales; Trichomonascaceae; Sugiyamaella	Sugiyamaella japonica	410836	DQ911456	NR_111239	NRRL:YB-2798	NRRL YB-2798			ex-holotype culture of Sugiyamaella japonica
497		Sugiyamaella marilandica	only 5.8S complete, ITS1&2 partial		Eukaryota; Fungi; Dikarya; Ascomycota; Saccharomycotina; Saccharomycetes; Saccharomycetales; Trichomonascaceae; Sugiyamaella	Sugiyamaella marilandica	377599	DQ911445	NR_111232	NRRL:YB-1847	NRRL YB-1847			ex-holotype culture of Sugiyamaella marilandica
498		Sugiyamaella marionensis	only 5.8S complete, ITS1&2 partial		Eukaryota; Fungi; Dikarya; Ascomycota; Saccharomycotina; Saccharomycetes; Saccharomycetales; Trichomonascaceae; Sugiyamaella	Sugiyamaella marionensis	378056	DQ911452	NR_111237	NRRL:YB-1336	NRRL YB-1336			ex-holotype culture of Sugiyamaella marionensis
499		Sugiyamaella neomexicana	only 5.8S complete, ITS1&2 partial		Eukaryota; Fungi; Dikarya; Ascomycota; Saccharomycotina; Saccharomycetes; Saccharomycetales; Trichomonascaceae; Sugiyamaella	Sugiyamaella neomexicana	378060	DQ911447	NR_111233	NRRL:YB-2450	NRRL YB-2450			ex-holotype culture of Sugiyamaella neomexicana
500		Sugiyamaella novakii	only 5.8S complete, ITS1&2 partial		Eukaryota; Fungi; Dikarya; Ascomycota; Saccharomycotina; Saccharomycetes; Saccharomycetales; Trichomonascaceae; Sugiyamaella	Sugiyamaella novakii	279894	DQ911449	NR_111235	NRRL:Y-27346	NRRL Y-27346			ex-holotype culture of Sugiyamaella novakii
501		Sugiyamaella paludigena	only 5.8S complete, ITS1&2 partial		Eukaryota; Fungi; Dikarya; Ascomycota; Saccharomycotina; Saccharomycetes; Saccharomycetales; Trichomonascaceae; Sugiyamaella	Sugiyamaella paludigena	45575	DQ911451	NR_111236	NRRL:Y-12697	NRRL Y-12697			ex-holotype culture of Sugiyamaella paludigena
502		Sugiyamaella pinicola	only 5.8S complete, ITS1&2 partial		Eukaryota; Fungi; Dikarya; Ascomycota; Saccharomycotina; Saccharomycetes; Saccharomycetales; Trichomonascaceae; Sugiyamaella	Sugiyamaella pinicola	378059	DQ911453	NR_111238	NRRL:YB-2263	NRRL YB-2263			ex-holotype culture of Sugiyamaella pinicola
503		Sugiyamaella valdiviana	only 5.8S_ITS2 complete, ITS1 partial		Eukaryota; Fungi; Dikarya; Ascomycota; Saccharomycotina; Saccharomycetes; Saccharomycetales; Trichomonascaceae; Sugiyamaella	Sugiyamaella valdiviana	45601	HM461646	NR_111544	NRRL:Y-7791				ex-holotype culture of Sugiyamaella valdiviana
504	Sung-Oui Suh	Candida bolitotheri	complete ITS1_5.8S_ITS2	Yes	Eukaryota; Fungi; Dikarya; Ascomycota; Saccharomycotina; Saccharomycetes; Saccharomycetales; mitosporic Saccharomycetales; Candida	Candida bolitotheri	246028	FJ623599	NR_111382	ATCC:MYA-4316	ATCC MYA-4316			ex-holotype culture of Candida bolitotheri
505	Sung-Oui Suh	Candida chickasaworum	complete ITS1_5.8S_ITS2		Eukaryota; Fungi; Dikarya; Ascomycota; Saccharomycotina; Saccharomycetes; Saccharomycetales; mitosporic Saccharomycetales; Candida	Candida chickasaworum	246045	FJ172247	NR_111338	ATCC:MYA-4314	ATCC MYA-4314			ex-holotype culture of Candida chickasaworum
507	Sung-Oui Suh	Candida terraborum	complete ITS1_5.8S_ITS2	Yes	Eukaryota; Fungi; Dikarya; Ascomycota; Saccharomycotina; Saccharomycetes; Saccharomycetales; mitosporic Saccharomycetales; Candida	Candida terraborum	246071	FJ623596	NR_111379	ATCC:MYA-4310	ATCC MYA-4310			ex-holotype culture of Candida terraborum
508	Sung-Oui Suh	Candida panamericana	complete ITS1_5.8S_ITS2	Yes	Eukaryota; Fungi; Dikarya; Ascomycota; Saccharomycotina; Saccharomycetes; Saccharomycetales; mitosporic Saccharomycetales; Candida	Candida panamericana	246030	FJ623601	NR_111384	ATCC:MYA-4318	ATCC MYA-4318			ex-holotype culture of Candida panamericana
509	Sung-Oui Suh	Lodderomyces elongisporus	complete ITS1_5.8S_ITS2	Yes	Eukaryota; Fungi; Dikarya; Ascomycota; Saccharomycotina; Saccharomycetes; Saccharomycetales; Debaryomycetaceae; Lodderomyces	Lodderomyces elongisporus	36914	HQ876042	NR_111593	ATCC:11503	ATCC 11503			ex-holotype culture of Lodderomyces elongisporus
511	Laszlo Irinyi	Candida ergatensis	complete ITS1_5.8S_ITS2	Yes	Eukaryota; Fungi; Dikarya; Ascomycota; Saccharomycotina; Saccharomycetes; Saccharomycetales; mitosporic Saccharomycetales; Candida	Candida ergatensis	1072095	EU343826	NR_111291	MUCL:30034	MUCL 30034;WM 07.29			ex-holotype culture of Scheffersomyces ergatensis
512		Scheffersomyces insectosa	complete ITS1_5.8S_ITS2	Yes	Eukaryota; Fungi; Dikarya; Ascomycota; Saccharomycotina; Saccharomycetes; Saccharomycetales; Debaryomycetaceae; Scheffersomyces	Scheffersomyces insectosa	1111082	HQ652064	NR_111587	ATCC:66611	ATCC 66611			ex-holotype culture of Scheffersomyces insectosa
513		Scheffersomyces lignosus	only 5.8S_ITS2 complete, ITS1 partial		Eukaryota; Fungi; Dikarya; Ascomycota; Saccharomycotina; Saccharomycetes; Saccharomycetales; Debaryomycetaceae; Scheffersomyces	Scheffersomyces lignosus	1111081	JN943262		CBS:4705;NRRL:Y-12856	NRRL Y-12856			ex-holotype culture of Scheffersomyces lignosus
514		Scheffersomyces segobiensis	complete ITS1_5.8S_ITS2	Yes	Eukaryota; Fungi; Dikarya; Ascomycota; Saccharomycotina; Saccharomycetes; Saccharomycetales; Debaryomycetaceae; Scheffersomyces	Scheffersomyces segobiensis	45512	DQ409166	NR_111217	NRRL:Y-11571				ex-holotype culture of Scheffersomyces segobiensis
515		Candida queiroziae	only 5.8S_ITS2 complete, ITS1 partial		Eukaryota; Fungi; Dikarya; Ascomycota; Saccharomycotina; Saccharomycetes; Saccharomycetales; mitosporic Saccharomycetales; Candida	Candida queiroziae	880181	HM566445		NRRL:Y-48722				ex-holotype culture of Scheffersomyces queiroziae
516	Sung-Oui Suh	Candida gosingica	only 5.8S_ITS2 complete, ITS1 partial	Yes	Eukaryota; Fungi; Dikarya; Ascomycota; Saccharomycotina; Saccharomycetes; Saccharomycetales; mitosporic Saccharomycetales; Candida	Candida gosingica	979893	HQ999978	NR_111610	ATCC:MYA-4750	ATCC MYA-4750			ex-holotype culture of Scheffersomyces gosingicus
517		Scheffersomyces shehatae	only 5.8S_ITS2 complete, ITS1 partial		Eukaryota; Fungi; Dikarya; Ascomycota; Saccharomycotina; Saccharomycetes; Saccharomycetales; Debaryomycetaceae; Scheffersomyces	Scheffersomyces shehatae	45589	JN943264		CBS:5813	NRRL Y-12858			ex-holotype culture of Scheffersomyces shehatae
518		Scheffersomyces quercinus	only 5.8S_ITS2 complete, ITS1 partial		Eukaryota; Fungi; Dikarya; Ascomycota; Saccharomycotina; Saccharomycetes; Saccharomycetales; Debaryomycetaceae; Scheffersomyces	Scheffersomyces quercinus	1125882	JN943260		NRRL:Y-48825;personal:Meredith Blackwell:W07-09-15-1-3-2	W07-09-15-1-3-2			ex-holotype culture of Scheffersomyces quercinus
519		Scheffersomyces virginianus	only 5.8S_ITS2 complete, ITS1 partial		Eukaryota; Fungi; Dikarya; Ascomycota; Saccharomycotina; Saccharomycetes; Saccharomycetales; Debaryomycetaceae; Scheffersomyces	Scheffersomyces virginianus	1125881	JN943259		NRRL:Y-48822;personal:Meredith Blackwell:W07-10-04-4-6-2	W07-10-04-4-6-2			ex-holotype culture of Scheffersomyces virginianus
520		Scheffersomyces illinoinensis	complete ITS1_5.8S_ITS2	Yes	Eukaryota; Fungi; Dikarya; Ascomycota; Saccharomycotina; Saccharomycetes; Saccharomycetales; Debaryomycetaceae; Scheffersomyces	Scheffersomyces illinoinensis	1303940	KC479692	NR_111865	NRRL:Y-48827	NRRL Y-48827			ex-holotype culture of Scheffersomyces illinoinensis
521		Scheffersomyces cryptocercus	only 5.8S_ITS2 complete, ITS1 partial	Yes	Eukaryota; Fungi; Dikarya; Ascomycota; Saccharomycotina; Saccharomycetes; Saccharomycetales; Debaryomycetaceae; Scheffersomyces	Scheffersomyces cryptocercus	1276504	JQ713977		NRRL:Y-48824;CBS:12658				ex-holotype culture of Scheffersomyces cryptocercus
522	Ewald Groenewald	Lecanosticta acicola	complete ITS1_5.8S_ITS2		Eukaryota; Fungi; Dikarya; Ascomycota; Pezizomycotina; Dothideomycetes; Dothideomycetidae; Capnodiales; Mycosphaerellaceae; Lecanosticta	Lecanosticta acicola	111012	KC012999		CBS:133791	WFP:13.12			ex-epitype culture of Lecanosticta acicola
523	Ewald Groenewald	Lecanosticta brevispora	only 5.8S complete, ITS1&2 partial	Yes	Eukaryota; Fungi; Dikarya; Ascomycota; Pezizomycotina; Dothideomycetes; Dothideomycetidae; Capnodiales; Mycosphaerellaceae; Lecanosticta	Lecanosticta brevispora	1276518	JX901763	NR_111800	CBS:133601	CPC 18092			ex-holotype culture of Lecanosticta brevispora
524	Ewald Groenewald	Lecanosticta guatemalensis	only 5.8S complete, ITS1&2 partial	Yes	Eukaryota; Fungi; Dikarya; Ascomycota; Pezizomycotina; Dothideomycetes; Dothideomycetidae; Capnodiales; Mycosphaerellaceae; Lecanosticta	Lecanosticta guatemalensis	1276521	JX901764	NR_111801	IMI:281598	IMI 281598			ex-holotype culture of Lecanosticta guatemalensis
525	Ewald Groenewald	Lecanosticta longispora	only 5.8S complete, ITS1&2 partial	Yes	Eukaryota; Fungi; Dikarya; Ascomycota; Pezizomycotina; Dothideomycetes; Dothideomycetidae; Capnodiales; Mycosphaerellaceae; Lecanosticta	Lecanosticta longispora	1276520	JX901766	NR_111802	CBS:133602	CPC 17940			ex-epitype culture of Lecanosticta longispora
526	Ewald Groenewald	Pseudocercospora angolensis	complete ITS1_5.8S_ITS2		Eukaryota; Fungi; Dikarya; Ascomycota; Pezizomycotina; Dothideomycetes; Dothideomycetidae; Capnodiales; Mycosphaerellaceae; Pseudocercospora	Pseudocercospora angolensis	133175	JQ324975	NR_111707	CBS:149.53	CBS 149.53			ex-holotype culture of Cercospora angolensis
528		Mycosphaerella ellipsoidea	complete ITS1_5.8S_ITS2	Yes	Eukaryota; Fungi; Dikarya; Ascomycota; Pezizomycotina; Dothideomycetes; Dothideomycetidae; Capnodiales; Mycosphaerellaceae; Mycosphaerella	Mycosphaerella ellipsoidea	112482	AY725545		CBS:110843;CPC:850	CBS 110843;CPC 850			ex-type culture of Mycosphaerella ellipsoidea
529		Mycosphaerella sumatrensis	only 5.8S complete, ITS1&2 partial	Yes	Eukaryota; Fungi; Dikarya; Ascomycota; Pezizomycotina; Dothideomycetes; Dothideomycetidae; Capnodiales; Mycosphaerellaceae; Mycosphaerella	Mycosphaerella sumatrensis	361264	JX901776	NR_111803	CBS:118499	CBS 118499			ex-type culture of Mycosphaerella sumatrensis
530		Pseudocercospora chiangmaiensis	only 5.8S complete, ITS1&2 partial	Yes	Eukaryota; Fungi; Dikarya; Ascomycota; Pezizomycotina; Dothideomycetes; Dothideomycetidae; Capnodiales; Mycosphaerellaceae; Pseudocercospora	Pseudocercospora chiangmaiensis	564085	JX901781	NR_111804	CBS:123244	CBS 123244			ex-type culture of Pseudocercospora chiangmaiensis
531	Ewald Groenewald	Pseudocercospora flavomarginata	only 5.8S complete, ITS1&2 partial	Yes	Eukaryota; Fungi; Dikarya; Ascomycota; Pezizomycotina; Dothideomycetes; Dothideomycetidae; Capnodiales; Mycosphaerellaceae; Pseudocercospora	Pseudocercospora flavomarginata	1200929	JX901782	NR_111805	CBS:118824	CBS 118824			ex-type culture of Pseudocercospora flavomarginata
532		Pseudocercospora madagascariensis	complete ITS1_5.8S_ITS2		Eukaryota; Fungi; Dikarya; Ascomycota; Pezizomycotina; Dothideomycetes; Dothideomycetidae; Capnodiales; Mycosphaerellaceae; Pseudocercospora	Pseudocercospora madagascariensis	634212	FJ790268		CBS:124155;CPC:14621	CBS 124155;CPC 14621			ex-type culture of Pseudocercospora madagascariensis
533		Pseudocercospora norchiensis	only 5.8S complete, ITS1&2 partial	Yes	Eukaryota; Fungi; Dikarya; Ascomycota; Pezizomycotina; Dothideomycetes; Dothideomycetidae; Capnodiales; Mycosphaerellaceae; Pseudocercospora	Pseudocercospora norchiensis	445187	JX901785	NR_111806	CBS:120738	CBS 120738			ex-type culture of Pseudocercospora norchiensis
534		Pseudocercospora robusta	only 5.8S_ITS2 complete, ITS1 partial	Yes	Eukaryota; Fungi; Dikarya; Ascomycota; Pezizomycotina; Dothideomycetes; Dothideomycetidae; Capnodiales; Mycosphaerellaceae; Pseudocercospora	Pseudocercospora robusta	161672	DQ303081		CBS:111175;CPC:1269	CBS 111175;CPC 1269			ex-type culture of Pseudocercospora robusta
535		Pseudocercospora sphaerulinae	only 5.8S complete, ITS1&2 partial	Yes	Eukaryota; Fungi; Dikarya; Ascomycota; Pezizomycotina; Dothideomycetes; Dothideomycetidae; Capnodiales; Mycosphaerellaceae; Pseudocercospora	Pseudocercospora sphaerulinae	687968	JX901791	NR_111807	CBS:112621	CBS 112621			ex-type culture of Pseudocercospora sphaerulinae
536	Ewald Groenewald	Lasiodiplodia egyptiacae	only 5.8S complete, ITS1&2 partial		Eukaryota; Fungi; Dikarya; Ascomycota; Pezizomycotina; Dothideomycetes; Dothideomycetes incertae sedis; Botryosphaeriales; Botryosphaeriaceae; mitosporic Botryosphaeriaceae; Lasiodiplodia	Lasiodiplodia egyptiacae	1245546	JN814397		CBS:130992	BOT10		CBS:H-20736	ex-holotype culture of Lasiodiplodia egyptiacae
538		Lasiodiplodia crassispora	only 5.8S complete, ITS1&2 partial	Yes	Eukaryota; Fungi; Dikarya; Ascomycota; Pezizomycotina; Dothideomycetes; Dothideomycetes incertae sedis; Botryosphaeriales; Botryosphaeriaceae; mitosporic Botryosphaeriaceae; Lasiodiplodia	Lasiodiplodia crassispora	336254	DQ103550	NR_111194	WAC:12533	WAC 12533			ex-type culture of Lasiodiplodia crassispora
539		Lasiodiplodia gonubiensis	complete ITS1_5.8S_ITS2	Yes	Eukaryota; Fungi; Dikarya; Ascomycota; Pezizomycotina; Dothideomycetes; Dothideomycetes incertae sedis; Botryosphaeriales; Botryosphaeriaceae; mitosporic Botryosphaeriaceae; Lasiodiplodia	Lasiodiplodia gonubiensis	336252	DQ458892	NR_111218	CBS:115812	CBS 115812			ex-type culture of Lasiodiplodia gonubiensis
540		Lasiodiplodia pseudotheobromae	complete ITS1_5.8S_ITS2	Yes	Eukaryota; Fungi; Dikarya; Ascomycota; Pezizomycotina; Dothideomycetes; Dothideomycetes incertae sedis; Botryosphaeriales; Botryosphaeriaceae; mitosporic Botryosphaeriaceae; Lasiodiplodia	Lasiodiplodia pseudotheobromae	466954	EF622077	NR_111264	CBS:116459	CBS 116459			ex-type culture of Lasiodiplodia pseudotheobromae
541		Chirleja buckii	only ITS1_5.8S complete, ITS2 partial		Eukaryota; Fungi; Dikarya; Ascomycota; Pezizomycotina; Lecanoromycetes; Ostropomycetidae; Pertusariales; Icmadophilaceae; Chirleja	Chirleja buckii	1276885	JX673914			W.R. Buck 57033		NY:1726379	holotype of Chirleja buckii
542		Babjeviella inositovora	only 5.8S complete, ITS1&2 partial	Yes	Eukaryota; Fungi; Dikarya; Ascomycota; Saccharomycotina; Saccharomycetes; Saccharomycetales; Debaryomycetaceae; Babjeviella	Babjeviella inositovora	45609	AB054113	NR_111018	JCM:10736	JCM 10736			ex-type culture of Babjeviella inositovora
543		Botryozyma nematodophila	only ITS1_5.8S complete, ITS2 partial		Eukaryota; Fungi; Dikarya; Ascomycota; Saccharomycotina; Saccharomycetes; Saccharomycetales; mitosporic Saccharomycetales; Botryozyma	Botryozyma nematodophila	44070	AY598606	NR_111167	CBS:7426	CBS 7426			ex-type culture of Botryozyma nematodophila
544		Citeromyces matritensis	only 5.8S complete, ITS1&2 partial		Eukaryota; Fungi; Dikarya; Ascomycota; Saccharomycotina; Saccharomycetes; Saccharomycetales; Saccharomycetaceae; Citeromyces	Citeromyces matritensis	36909	JN016712	NR_111633	NRRL:Y-2407	NRRL Y-2407			ex-type culture of Citeromyces matritensis	1
547		Dekkera bruxellensis	only 5.8S complete, ITS1&2 partial		Eukaryota; Fungi; Dikarya; Ascomycota; Saccharomycotina; Saccharomycetes; Saccharomycetales; Saccharomycetaceae; Dekkera	Dekkera bruxellensis	5007	AF043499	NR_111030	CBS:72	CBS 72			ex-type culture of Brettanomyces bruxellensis
548	Conrad Schoch	Eremothecium cymbalariae	only 5.8S complete, ITS1&2 partial		Eukaryota; Fungi; Dikarya; Ascomycota; Saccharomycotina; Saccharomycetes; Saccharomycetales; Saccharomycetaceae; Eremothecium	Eremothecium cymbalariae	45285	AY046219		NRRL:Y-17582	NRRL Y-17582			verified
550		Hanseniaspora valbyensis	only 5.8S complete, ITS1&2 partial	Yes	Eukaryota; Fungi; Dikarya; Ascomycota; Saccharomycotina; Saccharomycetes; Saccharomycetales; Saccharomycodaceae; Hanseniaspora	Hanseniaspora valbyensis	53685	AJ512434	NR_111113	CBS:479	CBS 479			ex-type culture of Hanseniaspora valbyensis
553		Kazachstania viticola	only 5.8S complete, ITS1&2 partial		Eukaryota; Fungi; Dikarya; Ascomycota; Saccharomycotina; Saccharomycetes; Saccharomycetales; Saccharomycetaceae; Kazachstania	Kazachstania viticola	71246	AY046162	NR_111120	NRRL:Y-27206	NRRL Y-27206			ex-type culture of Kazachstania viticola
554	Laszlo Irinyi	Kluyveromyces marxianus	only 5.8S_ITS2 complete, ITS1 partial		Eukaryota; Fungi; Dikarya; Ascomycota; Saccharomycotina; Saccharomycetes; Saccharomycetales; Saccharomycetaceae; Kluyveromyces	Kluyveromyces marxianus	4911	EF568057	NR_111251	CBS:712	WM 39			ex-type culture of Saccharomyces marxianus
555		Kodamaea ohmeri	complete ITS1_5.8S_ITS2		Eukaryota; Fungi; Dikarya; Ascomycota; Saccharomycotina; Saccharomycetes; Saccharomycetales; Metschnikowiaceae; Kodamaea	Kodamaea ohmeri	34356	GU246263		CBS:5367	CBS 5367			ex-type culture of Endomycopsis ohmeri
557		Kregervanrija fluxuum	complete ITS1_5.8S_ITS2	Yes	Eukaryota; Fungi; Dikarya; Ascomycota; Saccharomycotina; Saccharomycetes; Saccharomycetales; Pichiaceae; Kregervanrija	Kregervanrija fluxuum	324740	DQ104734	NR_111196	CBS:2287	CBS 2287			ex-type culture of Debaryomyces fluxuum
558	Laszlo Irinyi	Kuraishia capsulata	only 5.8S_ITS2 complete, ITS1 partial		Eukaryota; Fungi; Dikarya; Ascomycota; Saccharomycotina; Saccharomycetes; Saccharomycetales; Saccharomycetales incertae sedis; Kuraishia	Kuraishia capsulata	317047	EF568066		CBS:1993	WM 796			ex-type culture of Hansenula capsulata
559		Kurtzmaniella cleridarum	complete ITS1_5.8S_ITS2	Yes	Eukaryota; Fungi; Dikarya; Ascomycota; Saccharomycotina; Saccharomycetes; Saccharomycetales; Metschnikowiaceae; Kurtzmaniella	Kurtzmaniella cleridarum	121466	AY344065	NR_111153	CBS:8793	UWO(PS)99-101.1			ex-type culture of Kurtzmaniella cleridarum
560		Lachancea thermotolerans	only 5.8S_ITS2 complete, ITS1 partial		Eukaryota; Fungi; Dikarya; Ascomycota; Saccharomycotina; Saccharomycetes; Saccharomycetales; Saccharomycetaceae; Lachancea	Lachancea thermotolerans	381046	FJ153217	NR_111334	NRRL:Y-8284	Lee759;NRRL Y-8284			ex-type culture of Lachancea thermotolerans
561	Laszlo Irinyi	Meyerozyma guilliermondii	only 5.8S_ITS2 complete, ITS1 partial	Yes	Eukaryota; Fungi; Dikarya; Ascomycota; Saccharomycotina; Saccharomycetes; Saccharomycetales; Debaryomycetaceae; Meyerozyma	Meyerozyma guilliermondii	4929	EF568003	NR_111247	CBS:2030	WM 827			ex-type culture of Pichia guilliermondii
562	Laszlo Irinyi	Millerozyma farinosa	only 5.8S_ITS2 complete, ITS1 partial	Yes	Eukaryota; Fungi; Dikarya; Ascomycota; Saccharomycotina; Saccharomycetes; Saccharomycetales; Debaryomycetaceae; Millerozyma	Millerozyma farinosa	4920	EF568067	NR_111254	CBS:185	WM 803			ex-type culture of Saccharomyces farinosus
563		Nakaseomyces delphensis	only 5.8S complete, ITS1&2 partial		Eukaryota; Fungi; Dikarya; Ascomycota; Saccharomycotina; Saccharomycetes; Saccharomycetales; Saccharomycetaceae; Nakaseomyces	Nakaseomyces delphensis	51657	AY046166	NR_111121	NRRL:Y-2379	NRRL Y-2379			ex-type culture of Nakaseomyces delphensis
564	ISHAM (Laszlo Irinyi)	Nakazawaea holstii	only 5.8S_ITS2 complete, ITS1 partial	Yes	Eukaryota; Fungi; Dikarya; Ascomycota; Saccharomycotina; Saccharomycetes; Saccharomycetales; Saccharomycetaceae; Nakazawaea	Nakazawaea holstii	36025	EF568068	NR_111255	CBS:4140	WM 797			ex-type culture of Hansenula holstii
565		Naumovozyma dairenensis	only 5.8S complete, ITS1&2 partial		Eukaryota; Fungi; Dikarya; Ascomycota; Saccharomycotina; Saccharomycetes; Saccharomycetales; Saccharomycetaceae; Naumovozyma	Naumovozyma dairenensis	27289	AJ229072	NR_111088	CBS:421	CBS 421			ex-type culture of Saccharomyces dairenensis	2
566		Ogataea angusta	only 5.8S complete, ITS1&2 partial		Eukaryota; Fungi; Dikarya; Ascomycota; Saccharomycotina; Saccharomycetes; Saccharomycetales; Saccharomycetales incertae sedis; Ogataea	Ogataea angusta	870730	JF756588	NR_111630	CBS:7073	NRRL Y-2214			ex-type culture of Hansenula angusta
567		Pichia membranifaciens	complete ITS1_5.8S_ITS2	Yes	Eukaryota; Fungi; Dikarya; Ascomycota; Saccharomycotina; Saccharomycetes; Saccharomycetales; Pichiaceae; Pichia	Pichia membranifaciens	4926	DQ104710	NR_111195	CBS:107	CBS 107			ex-type culture of Saccharomyces membranifaciens
568		Priceomyces castillae	only 5.8S complete, ITS1&2 partial	Yes	Eukaryota; Fungi; Dikarya; Ascomycota; Saccharomycotina; Saccharomycetes; Saccharomycetales; Debaryomycetaceae; Priceomyces	Priceomyces castillae	45501	AB054114	NR_111019	JCM:10733	JCM 10733			ex-type culture of Priceomyces castillae
569		Priceomyces haplophilus	only 5.8S complete, ITS1&2 partial	Yes	Eukaryota; Fungi; Dikarya; Ascomycota; Saccharomycotina; Saccharomycetes; Saccharomycetales; Debaryomycetaceae; Priceomyces	Priceomyces haplophilus	45502	AB054117	NR_111020	JCM:1635	JCM 1635			ex-type culture of Priceomyces haplophilus
570		Saccharomyces cerevisiae	only 5.8S complete, ITS1&2 partial		Eukaryota; Fungi; Dikarya; Ascomycota; Saccharomycotina; Saccharomycetes; Saccharomycetales; Saccharomycetaceae; Saccharomyces	Saccharomyces cerevisiae	4932	AB018043	NR_111007	CBS:1171	CBS 1171			ex-type culture of Saccharomyces cerevisiae
571		Saccharomycodes ludwigii	only 5.8S complete, ITS1&2 partial		Eukaryota; Fungi; Dikarya; Ascomycota; Saccharomycotina; Saccharomycetes; Saccharomycetales; Saccharomycodaceae; Saccharomycodes	Saccharomycodes ludwigii	36035	AY046204	NR_111126	NRRL:Y-12793	NRRL Y-12793			ex-type culture of Saccharomycodes ludwigii
572	ISHAM (Laszlo Irinyi)	Scheffersomyces spartinae	complete ITS1_5.8S_ITS2	Yes	Eukaryota; Fungi; Dikarya; Ascomycota; Saccharomycotina; Saccharomycetes; Saccharomycetales; Debaryomycetaceae; Scheffersomyces	Scheffersomyces spartinae	45513	EU343815	NR_111290	CBS:6059	CBS 6059;WM 07.15			ex-type culture of Pichia spartinae
573		Scheffersomyces stipitis	only 5.8S_ITS2 complete, ITS1 partial		Eukaryota; Fungi; Dikarya; Ascomycota; Saccharomycotina; Saccharomycetes; Saccharomycetales; Debaryomycetaceae; Scheffersomyces	Scheffersomyces stipitis	4924	JN943257	NR_111693	CBS:5773	NRRL Y-7124			ex-type culture of Pichia stipitis
574		Schwanniomyces etchellsii	only 5.8S complete, ITS1&2 partial	Yes	Eukaryota; Fungi; Dikarya; Ascomycota; Saccharomycotina; Saccharomycetes; Saccharomycetales; Debaryomycetaceae; Schwanniomyces	Schwanniomyces etchellsii	28550	AB054099	NR_111017	JCM:3656	JCM 3656			ex-type culture of Schwanniomyces etchellsii
575		Schwanniomyces occidentalis	only 5.8S complete, ITS1&2 partial	Yes	Eukaryota; Fungi; Dikarya; Ascomycota; Saccharomycotina; Saccharomycetes; Saccharomycetales; Debaryomycetaceae; Schwanniomyces	Schwanniomyces occidentalis	27300	AB054023	NR_111016	JCM:8123	JCM 8123			ex-type culture of Schwanniomyces occidentalis
576	Sung-Oui Suh	Spathaspora passalidarum	complete ITS1_5.8S_ITS2	Yes	Eukaryota; Fungi; Dikarya; Ascomycota; Saccharomycotina; Saccharomycetes; Saccharomycetales; Debaryomycetaceae; Spathaspora	Spathaspora passalidarum	340170	FJ623614	NR_111397	ATCC:MYA-4345	ATCC MYA-4345			ex-type culture of Spathaspora passalidarum
577		Spencermartinsiella europaea	only 5.8S_ITS2 complete, ITS1 partial	Yes	Eukaryota; Fungi; Dikarya; Ascomycota; Saccharomycotina; Saccharomycetes; Saccharomycetales; Trichomonascaceae; Spencermartinsiella	Spencermartinsiella europaea	933994	GU733454	NR_111481	NCAIM:Y.01817	NCAIM Y.01817			ex-type culture of Spencermartinsiella europaea
578	Laszlo Irinyi	Sporopachydermia lactativora	complete ITS1_5.8S_ITS2	Yes	Eukaryota; Fungi; Dikarya; Ascomycota; Saccharomycotina; Saccharomycetes; Saccharomycetales; Dipodascaceae; Sporopachydermia	Sporopachydermia lactativora	45794	EU343870	NR_111310	MUCL:31273	MUCL 31273;WM 07.84			ex-type culture of Sporopachydermia lactativora
579		Starmerella bombicola	complete ITS1_5.8S_ITS2		Eukaryota; Fungi; Dikarya; Ascomycota; Saccharomycotina; Saccharomycetes; Saccharomycetes incertae sedis; Starmerella	Starmerella bombicola	75736	HQ111052		NRRL:Y-170691	NRRL Y-170691			ex-type culture of Starmerella bombicola
580		Tetrapisispora phaffii	only 5.8S complete, ITS1&2 partial		Eukaryota; Fungi; Dikarya; Ascomycota; Saccharomycotina; Saccharomycetes; Saccharomycetales; Saccharomycetaceae; Tetrapisispora	Tetrapisispora phaffii	113608	AY046176	NR_111123	NRRL:Y-8282	NRRL Y-8282			ex-type culture of Tetrapisispora phaffii
581		Torulaspora delbrueckii	only 5.8S_ITS2 complete, ITS1 partial	Yes	Eukaryota; Fungi; Dikarya; Ascomycota; Saccharomycotina; Saccharomycetes; Saccharomycetales; Saccharomycetaceae; Torulaspora	Torulaspora delbrueckii	4950	EF568083	NR_111257	CBS:1146	WM 821			ex-neotype culture of Saccharomyces delbrueckii
584		Yamadazyma philogaea	only ITS1_5.8S complete, ITS2 partial		Eukaryota; Fungi; Dikarya; Ascomycota; Saccharomycotina; Saccharomycetes; Saccharomycetales; Debaryomycetaceae; Yamadazyma	Yamadazyma philogaea	45510	HQ283368		CBS:6696	CBS 6696			ex-type culture of Pichia philogaea
585	ISHAM (Laszlo Irinyi)	Yamadazyma scolyti	complete ITS1_5.8S_ITS2	Yes	Eukaryota; Fungi; Dikarya; Ascomycota; Saccharomycotina; Saccharomycetes; Saccharomycetales; Debaryomycetaceae; Yamadazyma	Yamadazyma scolyti	45511	EU343807	NR_111287	CBS:4802	CBS 4802;WM 07.5			ex-type culture of Endomycopsis scolyti
586		Yamadazyma triangularis	only 5.8S_ITS2 complete, ITS1 partial	Yes	Eukaryota; Fungi; Dikarya; Ascomycota; Saccharomycotina; Saccharomycetes; Saccharomycetales; Debaryomycetaceae; Yamadazyma	Yamadazyma triangularis	45515	EU343869	NR_111309	MUCL:31234	MUCL 31234;WM 07.81			ex-type culture of Yamadazyma triangularis
589		Zygosaccharomyces rouxii	only 5.8S complete, ITS1&2 partial		Eukaryota; Fungi; Dikarya; Ascomycota; Saccharomycotina; Saccharomycetes; Saccharomycetales; Saccharomycetaceae; Zygosaccharomyces	Zygosaccharomyces rouxii	4956	AY046189	NR_111125	NRRL:Y-229	NRRL Y-229			ex-type culture of Zygosaccharomyces rouxii
590		Zygotorulaspora mrakii	only 5.8S complete, ITS1&2 partial		Eukaryota; Fungi; Dikarya; Ascomycota; Saccharomycotina; Saccharomycetes; Saccharomycetales; Saccharomycetaceae; Zygotorulaspora	Zygotorulaspora mrakii	42260	AY046169	NR_111122	NRRL:Y-12654	NRRL Y-12654			ex-type culture of Zygotorulaspora mrakii
591		Protomyces inouyei	complete ITS1_5.8S_ITS2		Eukaryota; Fungi; Dikarya; Ascomycota; Taphrinomycotina; Taphrinomycetes; Taphrinales; Protomycetaceae; Protomyces	Protomyces inouyei	27332	DQ497617		JCM:22201	AFTOL-ID 266;IAM 14512			ex-type culture of Protomyces inouyei
592		Saitoella complicata	only 5.8S_ITS2 complete, ITS1 partial		Eukaryota; Fungi; Dikarya; Ascomycota; Taphrinomycotina; Taphrinomycotina incertae sedis; Saitoella	Saitoella complicata	5606	JN161162	NR_111655	NRRL:Y-17804	NRRL Y-17804			ex-type culture of Saitoella complicata
593		Schizosaccharomyces cryophilus	complete ITS1_5.8S_ITS2		Eukaryota; Fungi; Dikarya; Ascomycota; Taphrinomycotina; Schizosaccharomycetes; Schizosaccharomycetales; Schizosaccharomycetaceae; Schizosaccharomyces	Schizosaccharomyces cryophilus	866546	GU470885		CBS:11777	OY26			ex-type culture of Schizosaccharomyces cryophilus
594		Schizosaccharomyces octosporus	complete ITS1_5.8S_ITS2		Eukaryota; Fungi; Dikarya; Ascomycota; Taphrinomycotina; Schizosaccharomycetes; Schizosaccharomycetales; Schizosaccharomycetaceae; Schizosaccharomyces	Schizosaccharomyces octosporus	4899	GU470886		CBS:371				ex-type culture of Schizosaccharomyces octosporus
595	Conrad Schoch	Schizosaccharomyces pombe	complete ITS1_5.8S_ITS2		Eukaryota; Fungi; Dikarya; Ascomycota; Taphrinomycotina; Schizosaccharomycetes; Schizosaccharomycetales; Schizosaccharomycetaceae; Schizosaccharomyces	Schizosaccharomyces pombe	4896	Z19578		ATCC:38366;NRRL:Y-12796	972			verified
596		Schizosaccharomyces japonicus	complete ITS1_5.8S_ITS2		Eukaryota; Fungi; Dikarya; Ascomycota; Taphrinomycotina; Schizosaccharomycetes; Schizosaccharomycetales; Schizosaccharomycetaceae; Schizosaccharomyces	Schizosaccharomyces japonicus	4897	AB243296		CBS:354				ex-type culture of Schizosaccharomyces japonicus
597		Daedalea radiata	only 5.8S complete, ITS1&2 partial		Eukaryota; Fungi; Dikarya; Basidiomycota; Agaricomycotina; Agaricomycetes; Polyporales; Daedalea	Daedalea radiata	1195798	JQ314350			Yuan 3629		IFP:H. S. Yuan 3629	holotype of Daedalea radiata
598		Daedalea circularis	only 5.8S complete, ITS1&2 partial		Eukaryota; Fungi; Dikarya; Basidiomycota; Agaricomycotina; Agaricomycetes; Polyporales; Daedalea	Daedalea circularis	1277673	JQ314351					BJFC:K. Cui 8488	holotype of Daedalea circularis
599		Dichomitus hubeiensis	only 5.8S complete, ITS1&2 partial		Eukaryota; Fungi; Dikarya; Basidiomycota; Agaricomycotina; Agaricomycetes; Polyporales; Polyporaceae; Dichomitus	Dichomitus hubeiensis	1277929	JQ780387			Wei2045		IFP:Wei 2045	holotype of Dichomitus hubeiensis
600		Taphrina carpini	only 5.8S_ITS2 complete, ITS1 partial	Yes	Eukaryota; Fungi; Dikarya; Ascomycota; Taphrinomycotina; Taphrinomycetes; Taphrinales; Taphrinaceae; Taphrina	Taphrina carpini	203081	AY239215		PYCC:5558	5A3.3			ex-type culture of Lalaria carpini
601		Lalaria inositophila	only 5.8S_ITS2 complete, ITS1 partial	Yes	Eukaryota; Fungi; Dikarya; Ascomycota; Taphrinomycotina; Taphrinomycetes; Taphrinales; Taphrinaceae; mitosporic Taphrina; Lalaria	Lalaria inositophila	231972	AY239209	NR_111147	PYCC:5733				ex-type culture of Lalaria inositophila
602		Lalaria veronaerambellii	only 5.8S_ITS2 complete, ITS1 partial	Yes	Eukaryota; Fungi; Dikarya; Ascomycota; Taphrinomycotina; Taphrinomycetes; Taphrinales; Taphrinaceae; mitosporic Taphrina; Lalaria	Lalaria veronaerambellii	231974	AY239216	NR_111148	PYCC:5734				ex-type culture of Lalaria veronirambellii
603		Cladophialophora arxii	only 5.8S complete, ITS1&2 partial	Yes	Eukaryota; Fungi; Dikarya; Ascomycota; Pezizomycotina; Eurotiomycetes; Chaetothyriomycetidae; Chaetothyriales; Herpotrichiellaceae; mitosporic Herpotrichiellaceae; Cladophialophora	Cladophialophora arxii	82108	EU103986	NR_111280	CBS:306.94	CBS 306.94			ex-type culture of Cladophialophora arxii
605		Cladophialophora carrionii	only 5.8S_ITS2 complete, ITS1 partial	Yes	Eukaryota; Fungi; Dikarya; Ascomycota; Pezizomycotina; Eurotiomycetes; Chaetothyriomycetidae; Chaetothyriales; Herpotrichiellaceae; mitosporic Herpotrichiellaceae; Cladophialophora	Cladophialophora carrionii	86049	AF050262		CBS:160.54	CBS 160.54			ex-type culture of Cladosporium carrionii
606		Cladophialophora devriesii	only 5.8S complete, ITS1&2 partial	Yes	Eukaryota; Fungi; Dikarya; Ascomycota; Pezizomycotina; Eurotiomycetes; Chaetothyriomycetidae; Chaetothyriales; Herpotrichiellaceae; mitosporic Herpotrichiellaceae; Cladophialophora	Cladophialophora devriesii	82107	EU103985	NR_111279	CBS:147.84	CBS 147.84			ex-type culture of Cladosporium devriesii
607		Cladophialophora emmonsii	only 5.8S complete, ITS1&2 partial	Yes	Eukaryota; Fungi; Dikarya; Ascomycota; Pezizomycotina; Eurotiomycetes; Chaetothyriomycetidae; Chaetothyriales; Herpotrichiellaceae; mitosporic Herpotrichiellaceae; Cladophialophora	Cladophialophora emmonsii	219601	EU103996	NR_111281	CBS:979.96	CBS 979.96			ex-type culture of Xylohypha emmonsii
608		Cladophialophora immunda	only 5.8S complete, ITS1&2 partial	Yes	Eukaryota; Fungi; Dikarya; Ascomycota; Pezizomycotina; Eurotiomycetes; Chaetothyriomycetidae; Chaetothyriales; Herpotrichiellaceae; mitosporic Herpotrichiellaceae; Cladophialophora	Cladophialophora immunda	569365	EU137318	NR_111283	CBS:834.96	CBS 834.96			ex-type culture of Cladophialophora immunda
609		Cladophialophora modesta	only 5.8S_ITS2 complete, ITS1 partial	Yes	Eukaryota; Fungi; Dikarya; Ascomycota; Pezizomycotina; Eurotiomycetes; Chaetothyriomycetidae; Chaetothyriales; Herpotrichiellaceae; mitosporic Herpotrichiellaceae; Cladophialophora	Cladophialophora modesta	633452	GU225939		CBS:985.96	CBS 985.96			ex-type culture of Cladophialophora modesta
610		Cladophialophora mycetomatis	only 5.8S complete, ITS1&2 partial		Eukaryota; Fungi; Dikarya; Ascomycota; Pezizomycotina; Eurotiomycetes; Chaetothyriomycetidae; Chaetothyriales; Herpotrichiellaceae; mitosporic Herpotrichiellaceae; Cladophialophora	Cladophialophora mycetomatis	569364	FJ385276	NR_111364	CBS:122637	CBS 122637			ex-type culture of Cladophialophora mycetomatis
611		Cladophialophora psammophila	only 5.8S complete, ITS1&2 partial	Yes	Eukaryota; Fungi; Dikarya; Ascomycota; Pezizomycotina; Eurotiomycetes; Chaetothyriomycetidae; Chaetothyriales; Herpotrichiellaceae; mitosporic Herpotrichiellaceae; Cladophialophora	Cladophialophora psammophila	1182553	AY857517	NR_111183	CBS:110553	CBS 110553			ex-type culture of Cladophialophora psammophila
612		Cladophialophora samoensis	only 5.8S complete, ITS1&2 partial	Yes	Eukaryota; Fungi; Dikarya; Ascomycota; Pezizomycotina; Eurotiomycetes; Chaetothyriomycetidae; Chaetothyriales; Herpotrichiellaceae; mitosporic Herpotrichiellaceae; Cladophialophora	Cladophialophora samoensis	1307820	EU137291	NR_111282	CBS:259.83	CBS 259.83			ex-type culture of Cladophialophora samoensis
613		Cladophialophora saturnica	only 5.8S complete, ITS1&2 partial	Yes	Eukaryota; Fungi; Dikarya; Ascomycota; Pezizomycotina; Eurotiomycetes; Chaetothyriomycetidae; Chaetothyriales; Herpotrichiellaceae; mitosporic Herpotrichiellaceae; Cladophialophora	Cladophialophora saturnica	463730	EU103984	NR_111278	CBS:118724	CBS 118724			ex-type culture of Cladophialophora saturnica
614		Cladophialophora subtilis	only 5.8S complete, ITS1&2 partial	Yes	Eukaryota; Fungi; Dikarya; Ascomycota; Pezizomycotina; Eurotiomycetes; Chaetothyriomycetidae; Chaetothyriales; Herpotrichiellaceae; mitosporic Herpotrichiellaceae; Cladophialophora	Cladophialophora subtilis	569363	FJ385273	NR_111363	CBS:122642	CBS 122642			ex-type culture of Cladophialophora subtilis
615		Cladophialophora yegresii	only 5.8S complete, ITS1&2 partial	Yes	Eukaryota; Fungi; Dikarya; Ascomycota; Pezizomycotina; Eurotiomycetes; Chaetothyriomycetidae; Chaetothyriales; Herpotrichiellaceae; mitosporic Herpotrichiellaceae; Cladophialophora	Cladophialophora yegresii	470704	EU137322	NR_111284	CBS:114405	CBS 114405			ex-type culture of Cladophialophora yegresii
616		Cyphellophora laciniata	complete ITS1_5.8S_ITS2		Eukaryota; Fungi; Dikarya; Ascomycota; Pezizomycotina; Eurotiomycetes; Chaetothyriomycetidae; Chaetothyriales; Cyphellophoraceae; Cyphellophora	Cyphellophora laciniata	241713	EU035416		CBS:190.61;ATCC:14166;MUCL:9569	CBS 190.61;ATCC 14166;MUCL 9569			ex-type culture of Cyphellophora laciniata
617		Cyphellophora pluriseptata	only 5.8S complete, ITS1&2 partial		Eukaryota; Fungi; Dikarya; Ascomycota; Pezizomycotina; Eurotiomycetes; Chaetothyriomycetidae; Chaetothyriales; Cyphellophoraceae; Cyphellophora	Cyphellophora pluriseptata	856652	FN908214	NR_111431	CBS:286.85	CBS 286.85			ex-type culture of Cyphellophora pluriseptata
618		Cyphellophora suttonii	only 5.8S_ITS2 complete, ITS1 partial	Yes	Eukaryota; Fungi; Dikarya; Ascomycota; Pezizomycotina; Eurotiomycetes; Chaetothyriomycetidae; Chaetothyriales; Cyphellophoraceae; Cyphellophora	Cyphellophora suttonii	856651	GU225946		MUCL:44073	MUCL 44073			ex-type culture of Cyphellophora suttonii
619		Cyphellophora vermispora	only 5.8S_ITS2 complete, ITS1 partial	Yes	Eukaryota; Fungi; Dikarya; Ascomycota; Pezizomycotina; Eurotiomycetes; Chaetothyriomycetidae; Chaetothyriales; Cyphellophoraceae; Cyphellophora	Cyphellophora vermispora	858610	GU225947		MUCL:43739	MUCL 43739			ex-type culture of Cyphellophora vermispora
620		Exophiala alcalophila	only 5.8S complete, ITS1&2 partial	Yes	Eukaryota; Fungi; Dikarya; Ascomycota; Pezizomycotina; Eurotiomycetes; Chaetothyriomycetidae; Chaetothyriales; Herpotrichiellaceae; mitosporic Herpotrichiellaceae; Exophiala	Exophiala alcalophila	91920	JF747041	NR_111624	CBS:520.82	CBS 520.82			ex-type culture of Exophiala alcalophila
621		Exophiala angulospora	only 5.8S complete, ITS1&2 partial	Yes	Eukaryota; Fungi; Dikarya; Ascomycota; Pezizomycotina; Eurotiomycetes; Chaetothyriomycetidae; Chaetothyriales; Herpotrichiellaceae; mitosporic Herpotrichiellaceae; Exophiala	Exophiala angulospora	91921	JF747046	NR_111625	CBS:482.92	CBS 482.92			ex-type culture of Exophiala angulospora
622		Exophiala aquamarina	only 5.8S complete, ITS1&2 partial	Yes	Eukaryota; Fungi; Dikarya; Ascomycota; Pezizomycotina; Eurotiomycetes; Chaetothyriomycetidae; Chaetothyriales; Herpotrichiellaceae; mitosporic Herpotrichiellaceae; Exophiala	Exophiala aquamarina	1033840	JF747054	NR_111626	CBS:119918	CBS 119918			ex-type culture of Exophiala aquamarina
623		Exophiala asiatica	only 5.8S complete, ITS1&2 partial	Yes	Eukaryota; Fungi; Dikarya; Ascomycota; Pezizomycotina; Eurotiomycetes; Chaetothyriomycetidae; Chaetothyriales; Herpotrichiellaceae; mitosporic Herpotrichiellaceae; Exophiala	Exophiala asiatica	557486	EU910265	NR_111332	CBS:122847	BMU 00015			ex-type culture of Exophiala asiatica
624		Exophiala bergeri	only 5.8S complete, ITS1&2 partial		Eukaryota; Fungi; Dikarya; Ascomycota; Pezizomycotina; Eurotiomycetes; Chaetothyriomycetidae; Chaetothyriales; Herpotrichiellaceae; mitosporic Herpotrichiellaceae; Exophiala	Exophiala bergeri	152767	EF551462	NR_111245	CBS:353.52	CBS 353.52			ex-type culture of Exophiala bergeri
625	Conrad Schoch	Exophiala brunnea	only 5.8S complete, ITS1&2 partial	Yes	Eukaryota; Fungi; Dikarya; Ascomycota; Pezizomycotina; Eurotiomycetes; Chaetothyriomycetidae; Chaetothyriales; Herpotrichiellaceae; mitosporic Herpotrichiellaceae; Exophiala	Exophiala brunnea	1008253	JF747062		CBS:587.66	CBS 587.66			verified
627		Exophiala castellanii	only 5.8S_ITS2 complete, ITS1 partial	Yes	Eukaryota; Fungi; Dikarya; Ascomycota; Pezizomycotina; Eurotiomycetes; Chaetothyriomycetidae; Chaetothyriales; Herpotrichiellaceae; mitosporic Herpotrichiellaceae; Exophiala	Exophiala castellanii	91922	GU225940		CBS:158.58	CBS 158.58			ex-type culture of Exophiala castellanii
628		Exophiala capensis	complete ITS1_5.8S_ITS2		Eukaryota; Fungi; Dikarya; Ascomycota; Pezizomycotina; Eurotiomycetes; Chaetothyriomycetidae; Chaetothyriales; Herpotrichiellaceae; mitosporic Herpotrichiellaceae; Exophiala	Exophiala capensis	1049287	JF499841		CBS:128771	CBS 128771			ex-type culture of Exophiala capensis
629		Exophiala dermatitidis	only 5.8S_ITS2 complete, ITS1 partial	Yes	Eukaryota; Fungi; Dikarya; Ascomycota; Pezizomycotina; Eurotiomycetes; Chaetothyriomycetidae; Chaetothyriales; Herpotrichiellaceae; mitosporic Herpotrichiellaceae; Exophiala	Exophiala dermatitidis	5970	AF050269		CBS:207.35	CBS 207.35			ex-type culture of Hormiscium dermatitidis
630		Exophiala equina	only 5.8S complete, ITS1&2 partial	Yes	Eukaryota; Fungi; Dikarya; Ascomycota; Pezizomycotina; Eurotiomycetes; Chaetothyriomycetidae; Chaetothyriales; Herpotrichiellaceae; mitosporic Herpotrichiellaceae; Exophiala	Exophiala equina	863577	JF747094	NR_111627	CBS:119.23	CBS 119.23			ex-type culture of Exophiala equina
631		Exophiala exophialae	only 5.8S complete, ITS1&2 partial	Yes	Eukaryota; Fungi; Dikarya; Ascomycota; Pezizomycotina; Eurotiomycetes; Chaetothyriomycetidae; Chaetothyriales; Herpotrichiellaceae; mitosporic Herpotrichiellaceae; Exophiala	Exophiala exophialae	13202	AY156973	NR_111130	CBS:668.76	CBS 668.76			ex-type culture of Phaeococcus exophialae
632		Exophiala halophila	only 5.8S complete, ITS1&2 partial	Yes	Eukaryota; Fungi; Dikarya; Ascomycota; Pezizomycotina; Eurotiomycetes; Chaetothyriomycetidae; Chaetothyriales; Herpotrichiellaceae; mitosporic Herpotrichiellaceae; Exophiala	Exophiala halophila	1033842	JF747108	NR_111628	CBS:121512	CBS 121512			ex-type culture of Exophiala halophila
633		Exophiala heteromorpha	only 5.8S complete, ITS1&2 partial	Yes	Eukaryota; Fungi; Dikarya; Ascomycota; Pezizomycotina; Eurotiomycetes; Chaetothyriomycetidae; Chaetothyriales; Herpotrichiellaceae; mitosporic Herpotrichiellaceae; Exophiala	Exophiala heteromorpha	91924	AY857524	NR_111184	CBS:232.33	CBS 232.33			ex-type culture of Trichosporum heteromorphum
634		Exophiala jeanselmei	only 5.8S_ITS2 complete, ITS1 partial	Yes	Eukaryota; Fungi; Dikarya; Ascomycota; Pezizomycotina; Eurotiomycetes; Chaetothyriomycetidae; Chaetothyriales; Herpotrichiellaceae; mitosporic Herpotrichiellaceae; Exophiala	Exophiala jeanselmei	5584	AY156963	NR_111129	CBS:507.90	CBS 507.90			ex-type culture of Torula jeanselmei
635		Exophiala lacus	only 5.8S complete, ITS1&2 partial	Yes	Eukaryota; Fungi; Dikarya; Ascomycota; Pezizomycotina; Eurotiomycetes; Chaetothyriomycetidae; Chaetothyriales; Herpotrichiellaceae; mitosporic Herpotrichiellaceae; Exophiala	Exophiala lacus	1033843	JF747110	NR_111629	CBS:117497	CBS 117497			ex-type culture of Exophiala lacus
637		Exophiala mesophila	only 5.8S_ITS2 complete, ITS1 partial	Yes	Eukaryota; Fungi; Dikarya; Ascomycota; Pezizomycotina; Eurotiomycetes; Chaetothyriomycetidae; Chaetothyriales; Herpotrichiellaceae; mitosporic Herpotrichiellaceae; Exophiala	Exophiala mesophila	212818	GU225941		CBS:402.95	CBS 402.95			ex-type culture of Exophiala mesophila
638		Exophiala moniliae	only 5.8S complete, ITS1&2 partial	Yes	Eukaryota; Fungi; Dikarya; Ascomycota; Pezizomycotina; Eurotiomycetes; Chaetothyriomycetidae; Chaetothyriales; Herpotrichiellaceae; mitosporic Herpotrichiellaceae; Exophiala	Exophiala moniliae	91926	GU225948	NR_111448	CBS:520.76	CBS 520.76			ex-type culture of Exophiala moniliae
639		Exophiala oligosperma	only 5.8S complete, ITS1&2 partial	Yes	Eukaryota; Fungi; Dikarya; Ascomycota; Pezizomycotina; Eurotiomycetes; Chaetothyriomycetidae; Chaetothyriales; Herpotrichiellaceae; mitosporic Herpotrichiellaceae; Exophiala	Exophiala oligosperma	215243	AY163551	NR_111134	CBS:725.88	CBS 725.88			ex-type culture of Exophiala oligosperma
640		Exophiala pisciphila	only 5.8S_ITS2 complete, ITS1 partial	Yes	Eukaryota; Fungi; Dikarya; Ascomycota; Pezizomycotina; Eurotiomycetes; Chaetothyriomycetidae; Chaetothyriales; Herpotrichiellaceae; mitosporic Herpotrichiellaceae; Exophiala	Exophiala pisciphila	86051	AF050272		CBS:537.73	CBS 537.73			ex-type culture of Exophiala pisciphila
641		Exophiala salmonis	only 5.8S_ITS2 complete, ITS1 partial		Eukaryota; Fungi; Dikarya; Ascomycota; Pezizomycotina; Eurotiomycetes; Chaetothyriomycetidae; Chaetothyriales; Herpotrichiellaceae; mitosporic Herpotrichiellaceae; Exophiala	Exophiala salmonis	43214	AF050274		CBS:157.67	CBS 157.67			ex-type culture of Exophiala salmonis
642		Exophiala sideris	only 5.8S complete, ITS1&2 partial		Eukaryota; Fungi; Dikarya; Ascomycota; Pezizomycotina; Eurotiomycetes; Chaetothyriomycetidae; Chaetothyriales; Herpotrichiellaceae; mitosporic Herpotrichiellaceae; Exophiala	Exophiala sideris	1016849	HQ452311	NR_111553	CBS:121818	dH 18174			ex-type culture of Exophiala sideris
643		Exophiala spinifera	only 5.8S complete, ITS1&2 partial	Yes	Eukaryota; Fungi; Dikarya; Ascomycota; Pezizomycotina; Eurotiomycetes; Chaetothyriomycetidae; Chaetothyriales; Herpotrichiellaceae; mitosporic Herpotrichiellaceae; Exophiala	Exophiala spinifera	91928	AY156976	NR_111131	CBS:899.68	CBS 899.68			ex-type culture of Phialophora spinifera
644		Exophiala xenobiotica	only 5.8S complete, ITS1&2 partial	Yes	Eukaryota; Fungi; Dikarya; Ascomycota; Pezizomycotina; Eurotiomycetes; Chaetothyriomycetidae; Chaetothyriales; Herpotrichiellaceae; mitosporic Herpotrichiellaceae; Exophiala	Exophiala xenobiotica	348802	DQ182587	NR_111203	CBS:118157	CBS 118157			ex-type culture of Exophiala xenobiotica
646		Fonsecaea multimorphosa	only 5.8S complete, ITS1&2 partial	Yes	Eukaryota; Fungi; Dikarya; Ascomycota; Pezizomycotina; Eurotiomycetes; Chaetothyriomycetidae; Chaetothyriales; Herpotrichiellaceae; mitosporic Herpotrichiellaceae; Fonsecaea	Fonsecaea multimorphosa	979981	JF267657	NR_111612	CBS:980.96	CBS 980.96			ex-type culture of Fonsecaea multimorphosa
647		Fonsecaea nubica	only 5.8S complete, ITS1&2 partial	Yes	Eukaryota; Fungi; Dikarya; Ascomycota; Pezizomycotina; Eurotiomycetes; Chaetothyriomycetidae; Chaetothyriales; Herpotrichiellaceae; mitosporic Herpotrichiellaceae; Fonsecaea	Fonsecaea nubica	856822	EU938592	NR_111333	CBS:269.64	CBS 269.64;dH 15656			ex-type culture of Fonsecaea nubica
650		Cyphellophora reptans	only 5.8S_ITS2 complete, ITS1 partial	Yes	Eukaryota; Fungi; Dikarya; Ascomycota; Pezizomycotina; Eurotiomycetes; Chaetothyriomycetidae; Chaetothyriales; Cyphellophoraceae; Cyphellophora	Cyphellophora reptans	293230	EU514699		CBS:113.85	CBS 113.85			ex-type culture of Phialophora reptans
651		Rhinocladiella anceps	only 5.8S complete, ITS1&2 partial	Yes	Eukaryota; Fungi; Dikarya; Ascomycota; Pezizomycotina; Eurotiomycetes; Chaetothyriomycetidae; Chaetothyriales; Herpotrichiellaceae; mitosporic Herpotrichiellaceae; Rhinocladiella	Rhinocladiella anceps	470084	EU041805	NR_111275	CBS:181.65	CBS 181.65			ex-isoneotype culture of Sporotrichum anceps
652		Rhinocladiella aquaspersa	only 5.8S_ITS2 complete, ITS1 partial	Yes	Eukaryota; Fungi; Dikarya; Ascomycota; Pezizomycotina; Eurotiomycetes; Chaetothyriomycetidae; Chaetothyriales; Herpotrichiellaceae; mitosporic Herpotrichiellaceae; Rhinocladiella	Rhinocladiella aquaspersa	37936	GU017733		CBS:313.73	CBS 313.73			ex-type culture of Acrotheca aquaspersa
654		Rhinocladiella basitona	only 5.8S complete, ITS1&2 partial	Yes	Eukaryota; Fungi; Dikarya; Ascomycota; Pezizomycotina; Eurotiomycetes; Chaetothyriomycetidae; Chaetothyriales; Herpotrichiellaceae; mitosporic Herpotrichiellaceae; Rhinocladiella	Rhinocladiella basitona	215248	AY163561	NR_111135	CBS:101460	CBS 101460			ex-type culture of Ramichloridium basitonum
655		Rhinocladiella mackenziei	only 5.8S complete, ITS1&2 partial	Yes	Eukaryota; Fungi; Dikarya; Ascomycota; Pezizomycotina; Eurotiomycetes; Chaetothyriomycetidae; Chaetothyriales; Herpotrichiellaceae; mitosporic Herpotrichiellaceae; Rhinocladiella	Rhinocladiella mackenziei	86056	AY857540	NR_111185	CBS:650.93	CBS 650.93			ex-type culture of Ramichloridium mackenziei
656		Rhinocladiella similis	only 5.8S complete, ITS1&2 partial		Eukaryota; Fungi; Dikarya; Ascomycota; Pezizomycotina; Eurotiomycetes; Chaetothyriomycetidae; Chaetothyriales; Herpotrichiellaceae; mitosporic Herpotrichiellaceae; Rhinocladiella	Rhinocladiella similis	319420	EF551461	NR_111244	CBS:111763	CBS 111763			ex-type culture of Rhinocladiella similis
657		Veronaea botryosa	only 5.8S_ITS2 complete, ITS1 partial	Yes	Eukaryota; Fungi; Dikarya; Ascomycota; Pezizomycotina; Eurotiomycetes; Chaetothyriomycetidae; Chaetothyriales; Herpotrichiellaceae; mitosporic Herpotrichiellaceae; Veronaea	Veronaea botryosa	364773	EU041816	NR_103593	CBS:254.57	CBS 254.57			ex-type culture of Veronaea botryosa
658		Veronaea japonica	complete ITS1_5.8S_ITS2	Yes	Eukaryota; Fungi; Dikarya; Ascomycota; Pezizomycotina; Eurotiomycetes; Chaetothyriomycetidae; Chaetothyriales; Herpotrichiellaceae; mitosporic Herpotrichiellaceae; Veronaea	Veronaea japonica	470107	EU041818	NR_111277	CBS:776.83	CBS 776.83			ex-type culture of Veronaea japonica
659		Pleurotheciella rivularia	only 5.8S complete, ITS1&2 partial		Eukaryota; Fungi; Dikarya; Ascomycota; Pezizomycotina; Sordariomycetes; Hypocreomycetidae; Hypocreomycetidae incertae sedis; Pleurotheciella	Pleurotheciella rivularia	1159698	JQ429160	NR_111711	CBS:125238	CBS 125238			ex-holotype culture of Pleurotheciella rivularia
660		Pleurotheciella centenaria	only 5.8S complete, ITS1&2 partial		Eukaryota; Fungi; Dikarya; Ascomycota; Pezizomycotina; Sordariomycetes; Hypocreomycetidae; Hypocreomycetidae incertae sedis; Pleurotheciella	Pleurotheciella centenaria	1159696	JQ429151	NR_111709	DAOM:229631	DAOM 229631			ex-holotype culture of Pleurotheciella centenaria
661		Pleurothecium semifecundum	only 5.8S complete, ITS1&2 partial		Eukaryota; Fungi; Dikarya; Ascomycota; Pezizomycotina; Sordariomycetes; Hypocreomycetidae; Hypocreomycetidae incertae sedis; Pleurothecium	Pleurothecium semifecundum	1159697	JQ429159	NR_111710	CBS:131271	CBS 131271			ex-holotype culture of Pleurothecium semifecundum
662		Yamadazyma siamensis	only 5.8S_ITS2 complete, ITS1 partial		Eukaryota; Fungi; Dikarya; Ascomycota; Saccharomycotina; Saccharomycetes; Saccharomycetales; Debaryomycetaceae; Yamadazyma	Yamadazyma siamensis	1207386	AB734049		DMKU:RK254;CBS:12573;BCC<THA>:50730;NBRC:108901	DMKU-RK254			ex-type culture of Yamadazyma siamensis
663		Yamadazyma phyllophila	complete ITS1_5.8S_ITS2	Yes	Eukaryota; Fungi; Dikarya; Ascomycota; Saccharomycotina; Saccharomycetes; Saccharomycetales; Debaryomycetaceae; Yamadazyma	Yamadazyma phyllophila	1207388	AB734050		CBS:12572;BCC<THA>:50736;NBRC:108906	DMKU-RK548			ex-type culture of Yamadazyma phyllophila
664		Yamadazyma paraphyllophila	only 5.8S_ITS2 complete, ITS1 partial	Yes	Eukaryota; Fungi; Dikarya; Ascomycota; Saccharomycotina; Saccharomycetes; Saccharomycetales; Debaryomycetaceae; Yamadazyma	Yamadazyma paraphyllophila	267649	AY559447	NR_111164	CBS:9928	TrB1-1			ex-type culture of Yamadazyma paraphyllophila
666		Lecanicillium acerosum	only 5.8S complete, ITS1&2 partial	Yes	Eukaryota; Fungi; Dikarya; Ascomycota; Pezizomycotina; Sordariomycetes; Hypocreomycetidae; Hypocreales; Cordycipitaceae; mitosporic Cordycipitaceae; Lecanicillium	Lecanicillium acerosum	468615	EF641893	NR_111268	CBS:418.81	CBS 418.81			ex-type culture of Lecanicillium acerosum
667		Lecanicillium antillanum	only 5.8S_ITS2 complete, ITS1 partial		Eukaryota; Fungi; Dikarya; Ascomycota; Pezizomycotina; Sordariomycetes; Hypocreomycetidae; Hypocreales; Cordycipitaceae; mitosporic Cordycipitaceae; Lecanicillium	Lecanicillium antillanum	132115	AJ292392	NR_111097	CBS:350.85	CBS 350.85			ex-type culture of Verticillium antillanum
668		Torrubiella alba	only 5.8S_ITS2 complete, ITS1 partial		Eukaryota; Fungi; Dikarya; Ascomycota; Pezizomycotina; Sordariomycetes; Hypocreomycetidae; Hypocreales; Cordycipitaceae; Torrubiella	Torrubiella alba	132578	AJ292464	NR_111103	CBS:726.73A	CBS 726.73a			ex-epitype culture of Cephalosporium aranearum
669		Lecanicillium araneicola	complete ITS1_5.8S_ITS2	Yes	Eukaryota; Fungi; Dikarya; Ascomycota; Pezizomycotina; Sordariomycetes; Hypocreomycetidae; Hypocreales; Cordycipitaceae; mitosporic Cordycipitaceae; Lecanicillium	Lecanicillium araneicola	501694	AB378506		NBRC:105407				ex-type culture of Lecanicillium araneicola
670		Lecanicillium dimorphum	only 5.8S_ITS2 complete, ITS1 partial		Eukaryota; Fungi; Dikarya; Ascomycota; Pezizomycotina; Sordariomycetes; Hypocreomycetidae; Hypocreales; Cordycipitaceae; mitosporic Cordycipitaceae; Lecanicillium	Lecanicillium dimorphum	132583	AJ292429	NR_111101	CBS:363.86	CBS 363.86			ex-type culture of Aphanocladium dimorphum
671		Lecanicillium fungicola var. aleophilum	only 5.8S_ITS2 complete, ITS1 partial	Yes	Eukaryota; Fungi; Dikarya; Ascomycota; Pezizomycotina; Sordariomycetes; Hypocreomycetidae; Hypocreales; Cordycipitaceae; mitosporic Cordycipitaceae; Lecanicillium	Lecanicillium fungicola var. aleophilum	170722	AF324876	NR_111064	CBS:357.80	CBS 357.80			ex-type culture of Verticillium fungicola var. aleophilum
672		Lecanicillium fungicola var. fungicola	only 5.8S_ITS2 complete, ITS1 partial		Eukaryota; Fungi; Dikarya; Ascomycota; Pezizomycotina; Sordariomycetes; Hypocreomycetidae; Hypocreales; Cordycipitaceae; mitosporic Cordycipitaceae; Lecanicillium	Lecanicillium fungicola var. fungicola	170721	EF641889		CBS:992.69	CBS 992.69			ex-epitype culture of Lecanicillium fungicola
673		Lecanicillium flavidum	only 5.8S_ITS2 complete, ITS1 partial	Yes	Eukaryota; Fungi; Dikarya; Ascomycota; Pezizomycotina; Sordariomycetes; Hypocreomycetidae; Hypocreales; mitosporic Hypocreales; Verticillium	Lecanicillium flavidum	468617	EF641878	NR_111266	CBS:342.80	CBS 342.80			ex-type culture of Verticillium fungicola var. flavidum
674		Lecanicillium fusisporum	only 5.8S_ITS2 complete, ITS1 partial		Eukaryota; Fungi; Dikarya; Ascomycota; Pezizomycotina; Sordariomycetes; Hypocreomycetidae; Hypocreales; Cordycipitaceae; mitosporic Cordycipitaceae; Lecanicillium	Lecanicillium fusisporum	132577	AJ292428	NR_111100	CBS:164.70	CBS 164.70			ex-type culture of Verticillium fusisporum
675		Lecanicillium kalimantanense	complete ITS1_5.8S_ITS2	Yes	Eukaryota; Fungi; Dikarya; Ascomycota; Pezizomycotina; Sordariomycetes; Hypocreomycetidae; Hypocreales; Cordycipitaceae; mitosporic Cordycipitaceae; Lecanicillium	Lecanicillium kalimantanense	468836	AB360356		BTCC<INDO>:F23	BTCC-F23			ex-type culture of Lecanicillium kalimantanense
676		Lecanicillium longisporum	only 5.8S_ITS2 complete, ITS1 partial		Eukaryota; Fungi; Dikarya; Ascomycota; Pezizomycotina; Sordariomycetes; Hypocreomycetidae; Hypocreales; Cordycipitaceae; mitosporic Cordycipitaceae; Lecanicillium	Lecanicillium longisporum	132109	AJ292385	NR_111095	IMI:021167	IMI 021167			ex-type culture of Lecanicillium longisporum
677		Lecanicillium muscarium	only 5.8S_ITS2 complete, ITS1 partial		Eukaryota; Fungi; Dikarya; Ascomycota; Pezizomycotina; Sordariomycetes; Hypocreomycetidae; Hypocreales; Cordycipitaceae; mitosporic Cordycipitaceae; Lecanicillium	Lecanicillium muscarium	291364	AJ292388	NR_111096	IMI:068689	IMI 068689			ex-epitype culture of Lecanicillium muscarium
678		Lecanicillium saksenae	only 5.8S_ITS2 complete, ITS1 partial		Eukaryota; Fungi; Dikarya; Ascomycota; Pezizomycotina; Sordariomycetes; Hypocreomycetidae; Hypocreales; Cordycipitaceae; mitosporic Cordycipitaceae; Lecanicillium	Lecanicillium saksenae	468837	AJ292432	NR_111102	IMI:179841	IMI 179841			ex-type culture of Lecanicillium saksenae
679		Torrubiella wallacei	only 5.8S_ITS2 complete, ITS1 partial	Yes	Eukaryota; Fungi; Dikarya; Ascomycota; Pezizomycotina; Sordariomycetes; Hypocreomycetidae; Hypocreales; Cordycipitaceae; Torrubiella	Torrubiella wallacei	224371	EF641891	NR_111267	CBS:101237	CBS 101237			ex-holotype culture of Torrubiella wallacei
680		Simplicillium obclavatum	only 5.8S_ITS2 complete, ITS1 partial		Eukaryota; Fungi; Dikarya; Ascomycota; Pezizomycotina; Sordariomycetes; Hypocreomycetidae; Hypocreales; Cordycipitaceae; mitosporic Cordycipitaceae; Simplicillium	Simplicillium obclavatum	132114	AJ292394	NR_111099	CBS:311.74	CBS 311.74			ex-type culture of Acremonium obclavatum
681		Simplicillium lamellicola	only 5.8S_ITS2 complete, ITS1 partial		Eukaryota; Fungi; Dikarya; Ascomycota; Pezizomycotina; Sordariomycetes; Hypocreomycetidae; Hypocreales; Cordycipitaceae; mitosporic Cordycipitaceae; Simplicillium	Simplicillium lamellicola	93593	AJ292393	NR_111098	CBS:116.25	CBS 116.25			ex-type culture of Cephalosporium lamellicola
682	Jian-Kui Liu	Botryosphaeria fusispora	complete ITS1_5.8S_ITS2		Eukaryota; Fungi; Dikarya; Ascomycota; Pezizomycotina; Dothideomycetes; Dothideomycetes incertae sedis; Botryosphaeriales; Botryosphaeriaceae; Botryosphaeria	Botryosphaeria fusispora	1279118	JX646789		MFLUCC:10-0098	MFLUCC 10-0098			ex-holotype culture of Botryosphaeria fusispora
683	Jian-Kui Liu	Botryosphaeria agaves	only 5.8S_ITS2 complete, ITS1 partial	Yes	Eukaryota; Fungi; Dikarya; Ascomycota; Pezizomycotina; Dothideomycetes; Dothideomycetes incertae sedis; Botryosphaeriales; Botryosphaeriaceae; Botryosphaeria	Botryosphaeria agaves	1280295	JX646791	NR_111792	MFLUCC:11-0125	MFLUCC 11-0125			ex-epitype culture of Botryosphaeria agaves
684	Jian-Kui Liu	Botryobambusa fusicoccum	only 5.8S_ITS2 complete, ITS1 partial		Eukaryota; Fungi; Dikarya; Ascomycota; Pezizomycotina; Dothideomycetes; Dothideomycetes incertae sedis; Botryosphaeriales; Botryosphaeriaceae; Botryobambusa	Botryobambusa fusicoccum	1279133	JX646792	NR_111793	MFLUCC:11-0143	MFLUCC 11-0143			ex-holotype culture of Botryobambusa fusicoccum
685		Botryosphaeria dothidea	only 5.8S complete, ITS1&2 partial	Yes	Eukaryota; Fungi; Dikarya; Ascomycota; Pezizomycotina; Dothideomycetes; Dothideomycetes incertae sedis; Botryosphaeriales; Botryosphaeriaceae; Botryosphaeria	Botryosphaeria dothidea	55169	AY236949	NR_111146	CMW:8000	CMW 8000			ex-epitype culture of Botryosphaeria dothidea
686	Jian-Kui Liu	Dothiorella thailandica	only ITS1_5.8S complete, ITS2 partial	Yes	Eukaryota; Fungi; Dikarya; Ascomycota; Pezizomycotina; Dothideomycetes; Dothideomycetes incertae sedis; Botryosphaeriales; Botryosphaeriaceae; Dothiorella	Dothiorella thailandica	1279135	JX646796	NR_111794	MFLUCC:11-0438	MFLUCC 11-0438			ex-holotype culture of Auerswaldia dothiorella
687	Jian-Kui Liu	Lasiodiplodia lignicola	only ITS1_5.8S complete, ITS2 partial		Eukaryota; Fungi; Dikarya; Ascomycota; Pezizomycotina; Dothideomycetes; Dothideomycetes incertae sedis; Botryosphaeriales; Botryosphaeriaceae; Lasiodiplodia	Lasiodiplodia lignicola	1280296	JX646797	NR_111795	MFLUCC:11-0435	MFLUCC 11-0435			ex-holotype culture of Auerswaldia lignicola
689		Sphaeropsis citrigena	complete ITS1_5.8S_ITS2	Yes	Eukaryota; Fungi; Dikarya; Ascomycota; Pezizomycotina; Dothideomycetes; Dothideomycetes incertae sedis; Botryosphaeriales; Botryosphaeriaceae; Sphaeropsis	Sphaeropsis citrigena	548668	EU673328		ICMP:16812	ICMP 16812			ex-holotype culture of Phaeobotryosphaeria citrigena A.J.L. Phillips, P.R. Johnst. & Pennycook
690	Jian-Kui Liu	Sphaeropsis eucalypticola	only ITS1_5.8S complete, ITS2 partial		Eukaryota; Fungi; Dikarya; Ascomycota; Pezizomycotina; Dothideomycetes; Dothideomycetes incertae sedis; Botryosphaeriales; Botryosphaeriaceae; Sphaeropsis	Sphaeropsis eucalypticola	1279151	JX646802	NR_111796	MFLUCC:11-0579	MFLUCC 11-0579			ex-holotype culture of Phaeobotryosphaeria eucalypti
691		Sphaeropsis porosa	only 5.8S complete, ITS1&2 partial	Yes	Eukaryota; Fungi; Dikarya; Ascomycota; Pezizomycotina; Dothideomycetes; Dothideomycetes incertae sedis; Botryosphaeriales; Botryosphaeriaceae; Sphaeropsis	Sphaeropsis porosa	240344	AY343379		CBS:110496;STEU:5132	STE-U 5132			ex-holotype culture of Diplodia porosa Van Niekerk & Crous
693		Aplosporella yalgorensis	only 5.8S complete, ITS1&2 partial	Yes	Eukaryota; Fungi; Dikarya; Ascomycota; Pezizomycotina; Dothideomycetes; Dothideomycetes incertae sedis; Botryosphaeriales; Botryosphaeriaceae; mitosporic Botryosphaeriaceae; Aplosporella	Aplosporella yalgorensis	465006	EF591926	NR_111262	MUCC:511	MUCC 511			ex-type culture of Aplosporella yalgorensis
694		Barriopsis fusca	complete ITS1_5.8S_ITS2	Yes	Eukaryota; Fungi; Dikarya; Ascomycota; Pezizomycotina; Dothideomycetes; Dothideomycetes incertae sedis; Botryosphaeriales; Botryosphaeriaceae; Barriopsis	Barriopsis fusca	548653	EU673330		CBS:174.26	CBS 174.26		BPI:599052	ex-holotype culture of Physalospora fusca
695		Botryosphaeria corticis	complete ITS1_5.8S_ITS2	Yes	Eukaryota; Fungi; Dikarya; Ascomycota; Pezizomycotina; Dothideomycetes; Dothideomycetes incertae sedis; Botryosphaeriales; Botryosphaeriaceae; Botryosphaeria	Botryosphaeria corticis	120389	DQ299245	NR_111213	CBS:119047	CBS 119047			ex-type culture of Physalospora corticis
696	S. Hambleton	Dothidea sambuci	complete ITS1_5.8S_ITS2	Yes	Eukaryota; Fungi; Dikarya; Ascomycota; Pezizomycotina; Dothideomycetes; Dothideomycetidae; Dothideales; Dothideaceae; Dothidea	Dothidea sambuci	162394	DQ491505	NR_111220	DAOM:231303	AFTOL-ID 274			ex-epitype culture of Dothidea sambuci
697		Dothiorella iberica	complete ITS1_5.8S_ITS2	Yes	Eukaryota; Fungi; Dikarya; Ascomycota; Pezizomycotina; Dothideomycetes; Dothideomycetes incertae sedis; Botryosphaeriales; Botryosphaeriaceae; mitosporic Botryosphaeriaceae; Dothiorella	Dothiorella iberica	286282	AY573202	NR_111165	CBS:115041	CBS 115041			ex-type culture of Botryosphaeria iberica
698		Dothiorella sarmentorum	complete ITS1_5.8S_ITS2	Yes	Eukaryota; Fungi; Dikarya; Ascomycota; Pezizomycotina; Dothideomycetes; Dothideomycetes incertae sedis; Botryosphaeriales; Botryosphaeriaceae; mitosporic Botryosphaeriaceae; Dothiorella	Dothiorella sarmentorum	240345	AY573212	NR_111166	IMI:63581b	IMI 63581b			ex-type culture of Dothiorella sarmentorum
700		Lasiodiplodia theobromae	complete ITS1_5.8S_ITS2	Yes	Eukaryota; Fungi; Dikarya; Ascomycota; Pezizomycotina; Dothideomycetes; Dothideomycetes incertae sedis; Botryosphaeriales; Botryosphaeriaceae; mitosporic Botryosphaeriaceae; Lasiodiplodia	Lasiodiplodia theobromae	45133	AY640255	NR_111174	CBS:164.96	CBS 164.96			ex-type culture of Lasiodiplodia theobromae
702	Jian-Kui Liu	Neodeightonia palmicola	complete ITS1_5.8S_ITS2		Eukaryota; Fungi; Dikarya; Ascomycota; Pezizomycotina; Dothideomycetes; Dothideomycetes incertae sedis; Botryosphaeriales; Botryosphaeriaceae; Neodeightonia	Neodeightonia palmicola	943338	HQ199221	NR_111550	MFLUCC:10-0822	MFLUCC 10-0822			ex-type culture of Neodeightonia palmicola
703		Neodeightonia phoenicum	complete ITS1_5.8S_ITS2	Yes	Eukaryota; Fungi; Dikarya; Ascomycota; Pezizomycotina; Dothideomycetes; Dothideomycetes incertae sedis; Botryosphaeriales; Botryosphaeriaceae; Neodeightonia	Neodeightonia phoenicum	548660	EU673340	NR_111325	CBS:122528	CBS 122528			ex-type culture of Neodeightonia phoenicum
706		Neoscytalidium novaehollandiae	only 5.8S complete, ITS1&2 partial	Yes	Eukaryota; Fungi; Dikarya; Ascomycota; Pezizomycotina; Dothideomycetes; Dothideomycetes incertae sedis; Botryosphaeriales; Botryosphaeriaceae; mitosporic Botryosphaeriaceae; Neoscytalidium	Neoscytalidium novaehollandiae	463685	EF585543	NR_111260	WAC:12691	WAC 12691			ex-type culture of Neoscytalidium novaehollandiae
707		Pleospora herbarum var. herbarum	complete ITS1_5.8S_ITS2		Eukaryota; Fungi; Dikarya; Ascomycota; Pezizomycotina; Dothideomycetes; Pleosporomycetidae; Pleosporales; Pleosporineae; Pleosporaceae; Pleospora	Pleospora herbarum var. herbarum	162404	EF452449	NR_111243	CBS:191.86	CBS 191.86			ex-type culture of Stemphylium herbarum
708		Pseudofusicoccum adansoniae	only 5.8S complete, ITS1&2 partial	Yes	Eukaryota; Fungi; Dikarya; Ascomycota; Pezizomycotina; Dothideomycetes; Dothideomycetes incertae sedis; Botryosphaeriales; Botryosphaeriaceae; mitosporic Botryosphaeriaceae; Pseudofusicoccum	Pseudofusicoccum adansoniae	463683	EF585534	NR_111259	WAC:12689	WAC 12689			ex-type culture of Pseudofusicoccum adansoniae
709		Saccharata capensis	complete ITS1_5.8S_ITS2		Eukaryota; Fungi; Dikarya; Ascomycota; Pezizomycotina; Dothideomycetes; Dothideomycetes incertae sedis; Botryosphaeriales; Botryosphaeriaceae; Saccharata	Saccharata capensis	531880	EU552130		CBS:122693				ex-type culture of Saccharata capensis
710		Spencermartinsia viticola	complete ITS1_5.8S_ITS2	Yes	Eukaryota; Fungi; Dikarya; Ascomycota; Pezizomycotina; Dothideomycetes; Dothideomycetes incertae sedis; Botryosphaeriales; Botryosphaeriaceae; Spencermartinsia	Spencermartinsia viticola	323561	AY905554	NR_111186	CBS:117009	CBS 117009			ex-type culture of Botryosphaeria viticola
711		Neofusicoccum parvum	only 5.8S complete, ITS1&2 partial	Yes	Eukaryota; Fungi; Dikarya; Ascomycota; Pezizomycotina; Dothideomycetes; Dothideomycetes incertae sedis; Botryosphaeriales; Botryosphaeriaceae; mitosporic Botryosphaeriaceae; Neofusicoccum	Neofusicoccum parvum	310453	AY236943		CMW:9081;ICMP:8003	CMW 9081;ICMP 8003			ex-type culture of Neofusicoccum parvum
712		Phaeobotryon mamane	complete ITS1_5.8S_ITS2	Yes	Eukaryota; Fungi; Dikarya; Ascomycota; Pezizomycotina; Dothideomycetes; Dothideomycetes incertae sedis; Botryosphaeriales; Botryosphaeriaceae; Phaeobotryon	Phaeobotryon mamane	548925	EU673332	NR_111324	CPC:12440	CPC 12440			ex-type culture of Phaeobotryon mamane
714	Peter Johnston	Pseudoplectania nigrella	only 5.8S_ITS2 complete, ITS1 partial		Eukaryota; Fungi; Dikarya; Ascomycota; Pezizomycotina; Pezizomycetes; Pezizales; Sarcosomataceae; Pseudoplectania	Pseudoplectania nigrella	96584	JX669807					KL:BK-4914	neotype of Pseudoplectania nigrella
715		Urnula padeniana	only 5.8S_ITS2 complete, ITS1 partial		Eukaryota; Fungi; Dikarya; Ascomycota; Pezizomycotina; Pezizomycetes; Pezizales; Sarcosomataceae; Urnula	Urnula padeniana	1280602	JX669825					WTU:F-033051	holotype of Urnula padeniana
716		Plectania zugazae	only 5.8S_ITS2 complete, ITS1 partial		Eukaryota; Fungi; Dikarya; Ascomycota; Pezizomycotina; Pezizomycetes; Pezizales; Sarcosomataceae; Plectania	Plectania zugazae	1280575	JX669817					personal:AVM 1467;MA:Fungi:53068	holotype of Plectania zugazae
717		Donadinia helvelloides	only 5.8S_ITS2 complete, ITS1 partial		Eukaryota; Fungi; Dikarya; Ascomycota; Pezizomycotina; Pezizomycetes; Pezizales; Sarcosomataceae; Donadinia	Donadinia helvelloides	1337426	JX669834					LY:PB 940	isotype of Donadinia helvelloides
718	Peter Johnston	Kalapuya brunnea	only 5.8S_ITS2 complete, ITS1 partial	Yes	Eukaryota; Fungi; Dikarya; Ascomycota; Pezizomycotina; Pezizomycetes; Pezizales; Morchellaceae; Kalapuya	Kalapuya brunnea	720594	GQ119354			Trappe 32730		OSC:131234	paratype of Kalapuya brunnea
719		Entoloma prismaticum	only 5.8S_ITS2 complete, ITS1 partial		Eukaryota; Fungi; Dikarya; Basidiomycota; Agaricomycotina; Agaricomycetes; Agaricomycetidae; Agaricales; Entolomataceae; Entoloma	Entoloma prismaticum	1132867	AB691998			K381		TNS:F-46866	holotype of Entoloma prismaticum
720		Entoloma hypogaeum	only 5.8S complete, ITS1&2 partial		Eukaryota; Fungi; Dikarya; Basidiomycota; Agaricomycotina; Agaricomycetes; Agaricomycetidae; Agaricales; Entolomataceae; Entoloma	Entoloma hypogaeum	1132874	AB692001			K382		TNS:F-46869	holotype of Entoloma hypogaeum
721		Sulzbacheromyces caatingae	only 5.8S complete, ITS1&2 partial	Yes	Eukaryota; Fungi; Dikarya; Basidiomycota; Agaricomycotina; Agaricomycetes; Agaricomycetidae; Lepidostromatales; Lepidostromataceae; Sulzbacheromyces	Sulzbacheromyces caatingae	1429055	KC170321			DNA5386		F:Sulzbacher 1478	isotype of Lepidostroma caatingae
722	Ewald Groenewald	Bipolaris microstegii	complete ITS1_5.8S_ITS2		Eukaryota; Fungi; Dikarya; Ascomycota; Pezizomycotina; Dothideomycetes; Pleosporomycetidae; Pleosporales; Pleosporineae; Pleosporaceae; Bipolaris	Bipolaris microstegii	1283761	JX089579		CBS:132550	AR 4840			ex-holotype culture of Bipolaris microstegii
723	Ewald Groenewald	Calonectria pentaseptata	complete ITS1_5.8S_ITS2		Eukaryota; Fungi; Dikarya; Ascomycota; Pezizomycotina; Sordariomycetes; Hypocreomycetidae; Hypocreales; Nectriaceae; Calonectria	Calonectria pentaseptata	1278155	JX855950		CBS:133349	VM1			ex-holotype culture of Calonectria pentaseptata
724	Ewald Groenewald	Phaeococcomyces eucalypti	complete ITS1_5.8S_ITS2		Eukaryota; Fungi; Dikarya; Ascomycota; Pezizomycotina; Arthoniomycetes; Lichenostigmatales; Phaeococcomycetaceae; Phaeococcomyces	Phaeococcomyces eucalypti	1280617	KC005769		CPC:17606			CBS:H-21091	ex-holotype culture of Phaeococcomyces eucalypti	1
725	Ewald Groenewald	Penidiella drakensbergensis	complete ITS1_5.8S_ITS2	Yes	Eukaryota; Fungi; Dikarya; Ascomycota; Pezizomycotina; Dothideomycetes; Dothideomycetidae; Capnodiales; Capnodiales incertae sedis; Penidiella	Penidiella drakensbergensis	1280618	KC005770	NR_111821	CPC:19778				ex-holotype culture of Penidiella drakensbergensis
726	Ewald Groenewald	Ceramothyrium melastoma	complete ITS1_5.8S_ITS2		Eukaryota; Fungi; Dikarya; Ascomycota; Pezizomycotina; Eurotiomycetes; Chaetothyriomycetidae; Chaetothyriales; Chaetothyriaceae; Ceramothyrium	Ceramothyrium melastoma	1280619	KC005771	NR_111822	CPC:19837				ex-holotype culture of Ceramothyrium melastoma
727	Ewald Groenewald	Strelitziana cliviae	complete ITS1_5.8S_ITS2		Eukaryota; Fungi; Dikarya; Ascomycota; Pezizomycotina; Eurotiomycetes; Chaetothyriomycetidae; Chaetothyriales; mitosporic Chaetothyriales; Strelitziana	Strelitziana cliviae	1280620	KC005772	NR_111823	CPC:19822				ex-holotype culture of Strelitziana cliviae
728	Ewald Groenewald	Ceramothyrium podocarpi	complete ITS1_5.8S_ITS2		Eukaryota; Fungi; Dikarya; Ascomycota; Pezizomycotina; Eurotiomycetes; Chaetothyriomycetidae; Chaetothyriales; Chaetothyriaceae; Ceramothyrium	Ceramothyrium podocarpi	1280621	KC005773		CPC:19826				ex-holotype culture of Ceramothyrium podocarpi
729	Ewald Groenewald	Phialophora livistonae	complete ITS1_5.8S_ITS2	Yes	Eukaryota; Fungi; Dikarya; Ascomycota; Pezizomycotina; Eurotiomycetes; Chaetothyriomycetidae; Chaetothyriales; Herpotrichiellaceae; mitosporic Herpotrichiellaceae; Phialophora	Phialophora livistonae	1280622	KC005774	NR_111824	CPC:19433				ex-holotype culture of Phialophora livistonae
730	Ewald Groenewald	Devriesia shakazului	complete ITS1_5.8S_ITS2	Yes	Eukaryota; Fungi; Dikarya; Ascomycota; Pezizomycotina; Dothideomycetes; Dothideomycetidae; Capnodiales; Teratosphaeriaceae; mitosporic Teratosphaeriaceae; Devriesia	Devriesia shakazului	1280623	KC005775	NR_111825	CPC:19782				ex-holotype culture of Devriesia shakazului
731	Ewald Groenewald	Zasmidium syzygii	complete ITS1_5.8S_ITS2	Yes	Eukaryota; Fungi; Dikarya; Ascomycota; Pezizomycotina; Dothideomycetes; Dothideomycetidae; Capnodiales; Mycosphaerellaceae; Zasmidium	Zasmidium syzygii	1280624	KC005777	NR_111826	CPC:19792				ex-holotype culture of Zasmidium syzygii
732	Ewald Groenewald	Devriesia stirlingiae	only 5.8S_ITS2 complete, ITS1 partial	Yes	Eukaryota; Fungi; Dikarya; Ascomycota; Pezizomycotina; Dothideomycetes; Dothideomycetidae; Capnodiales; Teratosphaeriaceae; mitosporic Teratosphaeriaceae; Devriesia	Devriesia stirlingiae	1280625	KC005778		CPC:19948			CBS:H-21083	ex-holotype culture of Devriesia stirlingiae
733	Ewald Groenewald	Phyllosticta aristolochiicola	only 5.8S_ITS2 complete, ITS1 partial	Yes	Eukaryota; Fungi; Dikarya; Ascomycota; Pezizomycotina; Dothideomycetes; Dothideomycetes incertae sedis; Botryosphaeriales; Phyllostictaceae; Phyllosticta	Phyllosticta aristolochiicola	1284201	JX486129	NR_111791	BRIP:53316a	BRIP 53316a			ex-holotype culture of Phyllosticta aristolochiicola
734	Ewald Groenewald	Zymoseptoria verkleyi	only ITS1_5.8S complete, ITS2 partial		Eukaryota; Fungi; Dikarya; Ascomycota; Pezizomycotina; Dothideomycetes; Dothideomycetidae; Capnodiales; Mycosphaerellaceae; Zymoseptoria	Zymoseptoria verkleyi	1280626	KC005781	NR_111828	CBS:133618	S657			ex-holotype culture of Zymoseptoria verkleyi
735	Ewald Groenewald	Toxicocladosporium posoqueriae	complete ITS1_5.8S_ITS2		Eukaryota; Fungi; Dikarya; Ascomycota; Pezizomycotina; Dothideomycetes; Dothideomycetidae; Capnodiales; Davidiellaceae; mitosporic Davidiellaceae; Toxicocladosporium	Toxicocladosporium posoqueriae	1280627	KC005782		CPC:19305			CBS:H-21086	ex-holotype culture of Toxicocladosporium posoqueriae
736	Ewald Groenewald	Catenulostroma corymbiae	complete ITS1_5.8S_ITS2		Eukaryota; Fungi; Dikarya; Ascomycota; Pezizomycotina; Dothideomycetes; Dothideomycetidae; Capnodiales; Teratosphaeriaceae; mitosporic Teratosphaeriaceae; Catenulostroma	Catenulostroma corymbiae	1280628	KC005783		CPC:19435				ex-holotype culture of Catenulostroma corymbiae
737	Ewald Groenewald	Penidiella carpentariae	only ITS1_5.8S complete, ITS2 partial		Eukaryota; Fungi; Dikarya; Ascomycota; Pezizomycotina; Dothideomycetes; Dothideomycetidae; Capnodiales; Capnodiales incertae sedis; Penidiella	Penidiella carpentariae	1280629	KC005784	NR_111829	CPC:19439				ex-holotype culture of Penidiella carpentariae
738	Ewald Groenewald	Seiridium phylicae	complete ITS1_5.8S_ITS2	Yes	Eukaryota; Fungi; Dikarya; Ascomycota; Pezizomycotina; Sordariomycetes; Xylariomycetidae; Xylariales; Amphisphaeriaceae; mitosporic Amphisphaeriaceae; Seiridium	Seiridium phylicae	1280630	KC005785		CPC:19962			CBS:H-21089	ex-holotype culture of Seiridium phylicae
739	Ewald Groenewald	Microcyclospora rhoicola	complete ITS1_5.8S_ITS2	Yes	Eukaryota; Fungi; Dikarya; Ascomycota; Pezizomycotina; Dothideomycetes; Dothideomycetidae; Capnodiales; mitosporic Capnodiales; Microcyclospora	Microcyclospora rhoicola	1284202	KC012605	NR_111831	DAOM:242276	DAOM 242276			ex-holotype culture of Microcyclospora rhoicola
740	Ewald Groenewald	Collembolispora aristata	only 5.8S_ITS2 complete, ITS1 partial	Yes	Eukaryota; Fungi; Dikarya; Ascomycota; Pezizomycotina; Leotiomycetes; Helotiales; mitosporic Helotiales; Collembolispora	Collembolispora aristata	1280616	KC005789	NR_111830	CPC:21145				ex-holotype culture of Collembolispora aristata
741	Ewald Groenewald	Synchaetomella acerina	only 5.8S_ITS2 complete, ITS1 partial	Yes	Eukaryota; Fungi; Dikarya; Ascomycota; Pezizomycotina; Leotiomycetes; mitosporic Leotiomycetes; Synchaetomella	Synchaetomella acerina	1282988	JX989830	NR_111811	DAOM:242271	DAOM 242271			ex-holotype culture of Synchaetomella acerina
743	Ewald Groenewald	Passalora lobeliae-fistulosae	only 5.8S_ITS2 complete, ITS1 partial	Yes	Eukaryota; Fungi; Dikarya; Ascomycota; Pezizomycotina; Dothideomycetes; Dothideomycetidae; Capnodiales; Mycosphaerellaceae; Passalora	Passalora lobeliae-fistulosae	1266455	JX494388		personal:Barreto:COAD 1116	COAD 1116		VIC:31840	ex-holotype culture of Passalora lobeliae-fistulosis
744		Borofutus dhakanus	only 5.8S complete, ITS1&2 partial	Yes	Eukaryota; Fungi; Dikarya; Basidiomycota; Agaricomycotina; Agaricomycetes; Agaricomycetidae; Boletales; Boletineae; Boletaceae; Borofutus	Borofutus dhakanus	1256133	JQ928605					HKAS:73785	holotype of Borofutus dhakanus
746		Antrodiella chinensis	only 5.8S complete, ITS1&2 partial		Eukaryota; Fungi; Dikarya; Basidiomycota; Agaricomycotina; Agaricomycetes; Polyporales; Antrodiella	Antrodiella chinensis	1284621	JX110844			Dai9019		IFP:Dai 9019	holotype of Antrodiella chinensis
747	María P. Martín et al.	Hyphoderma macaronesicum	only 5.8S_ITS2 complete, ITS1 partial	Yes	Eukaryota; Fungi; Dikarya; Basidiomycota; Agaricomycotina; Agaricomycetes; Corticiales; Corticiaceae; Hyphoderma	Hyphoderma macaronesicum	1071049	HE577024			E09/57-8		TFC:Mic 15939	holotype of Hyphoderma macaronesicum
749	Ewald Groenewald	Gnomoniopsis smithogilvyi	only 5.8S complete, ITS1&2 partial		Eukaryota; Fungi; Dikarya; Ascomycota; Pezizomycotina; Sordariomycetes; Sordariomycetidae; Diaporthales; Gnomoniaceae; Gnomoniopsis	Gnomoniopsis smithogilvyi	1191159	JQ910642	NR_111727	CBS:130190	CBS 130190			ex-holotype culture of Gnomoniopsis smithogilvyi
750	Ewald Groenewald	Gondwanamyces wingfieldii	complete ITS1_5.8S_ITS2	Yes	Eukaryota; Fungi; Dikarya; Ascomycota; Pezizomycotina; Sordariomycetes; Hypocreomycetidae; Microascales; Gondwanamycetaceae; Gondwanamyces	Gondwanamyces wingfieldii	1198492	JQ844903	NR_111723	CBS:132470	CFR150			ex-holotype culture of Gondwanamyces wingfieldii
751	Ewald Groenewald	Diaporthe passiflorae	complete ITS1_5.8S_ITS2		Eukaryota; Fungi; Dikarya; Ascomycota; Pezizomycotina; Sordariomycetes; Sordariomycetidae; Diaporthales; Diaporthaceae; Diaporthe	Diaporthe passiflorae	1196422	JX069860		CBS:132527	CPC 19183			ex-holotype culture of Diaporthe passiflorae
752	Ewald Groenewald	Pseudoplagiostoma corymbiae	complete ITS1_5.8S_ITS2		Eukaryota; Fungi; Dikarya; Ascomycota; Pezizomycotina; Sordariomycetes; Sordariomycetidae; Diaporthales; Pseudoplagiostomataceae; Pseudoplagiostoma	Pseudoplagiostoma corymbiae	1196423	JX069861		CBS:132529	CPC 19287			ex-holotype culture of Pseudoplagiostoma corymbiae
753	Ewald Groenewald	Diaporthe eucalyptorum	complete ITS1_5.8S_ITS2		Eukaryota; Fungi; Dikarya; Ascomycota; Pezizomycotina; Sordariomycetes; Sordariomycetidae; Diaporthales; Diaporthaceae; Diaporthe	Diaporthe eucalyptorum	1196424	JX069862		CBS:132525	CPC 17203			ex-holotype culture of Diaporthe eucalyptorum
754	Ewald Groenewald	Sporisorium andrewmitchellii	complete ITS1_5.8S_ITS2		Eukaryota; Fungi; Dikarya; Basidiomycota; Ustilaginomycotina; Ustilaginomycetes; Ustilaginales; Ustilaginaceae; Sporisorium	Sporisorium andrewmitchellii	1198444	JQ995369					BRIP:54879	holotype of Sporisorium andrewmitchellii
755	Ewald Groenewald	Montagnula aloes	only 5.8S_ITS2 complete, ITS1 partial	Yes	Eukaryota; Fungi; Dikarya; Ascomycota; Pezizomycotina; Dothideomycetes; Pleosporomycetidae; Pleosporales; Massarineae; Montagnulaceae; Montagnula	Montagnula aloes	1196425	JX069863	NR_111757	CBS:132531	CPC 19671			ex-holotype culture of Montagnula aloes
756	Ewald Groenewald	Diaporthe canthii	complete ITS1_5.8S_ITS2	CATTG	Eukaryota; Fungi; Dikarya; Ascomycota; Pezizomycotina; Sordariomycetes; Sordariomycetidae; Diaporthales; Diaporthaceae; Diaporthe	Diaporthe canthii	1196426	JX069864	NR_111758	CBS:132533	CPC 19740			ex-holotype culture of Diaporthe canthii
757	Ewald Groenewald	Phyllosticta ericarum	complete ITS1_5.8S_ITS2		Eukaryota; Fungi; Dikarya; Ascomycota; Pezizomycotina; Dothideomycetes; Dothideomycetes incertae sedis; Botryosphaeriales; Phyllostictaceae; Phyllosticta	Phyllosticta ericarum	1196427	JX069865	NR_111759	CBS:132534	CPC 19744			ex-holotype culture of Phyllosticta ericarum
758	Ewald Groenewald	Coleophoma proteae	complete ITS1_5.8S_ITS2		Eukaryota; Fungi; Dikarya; Ascomycota; Pezizomycotina; Dothideomycetes; Dothideomycetidae; Dothideales; mitosporic Dothideales; Coleophoma	Coleophoma proteae	1196428	JX069866	NR_111760	CBS:132532	CPC 19714			ex-holotype culture of Coleophoma proteae
759	Ewald Groenewald	Chrysocrypta corymbiae	only 5.8S_ITS2 complete, ITS1 partial	CATTG	Eukaryota; Fungi; Dikarya; Ascomycota; Pezizomycotina; Sordariomycetes; Sordariomycetidae; Diaporthales; Chrysocrypta	Chrysocrypta corymbiae	1196430	JX069867		CBS:132528	CPC 19279		CBS:H-20963	ex-holotype culture of Chrysocrypta corymbiae
760	Ewald Groenewald	Pseudopenidiella piceae	only ITS1_5.8S complete, ITS2 partial		Eukaryota; Fungi; Dikarya; Ascomycota; mitosporic Ascomycota; Pseudopenidiella	Pseudopenidiella piceae	1196432	JX069868	NR_111761	CBS:131453	CPC 19969			ex-holotype culture of Pseudopenidiella piceae
761	Ewald Groenewald	Trinosporium guianense	complete ITS1_5.8S_ITS2		Eukaryota; Fungi; Dikarya; Ascomycota; Pezizomycotina; leotiomyceta incertae sedis; Trinosporium	Trinosporium guianense	1196434	JX069869		CBS:132537	CPC 19878			ex-holotype culture of Trinosporium guianense
762	Ewald Groenewald	Phaeocercospora colophospermi	complete ITS1_5.8S_ITS2		Eukaryota; Fungi; Dikarya; Ascomycota; Pezizomycotina; Dothideomycetes; Dothideomycetidae; Capnodiales; Mycosphaerellaceae; Phaeocercospora	Phaeocercospora colophospermi	1196436	JX069870		CPC:19812	CPC 19812			ex-holotype culture of Phaeocercospora colophospermi
763	Ewald Groenewald	Myrmecridium banksiae	complete ITS1_5.8S_ITS2		Eukaryota; Fungi; Dikarya; Ascomycota; Pezizomycotina; Sordariomycetes; mitosporic Sordariomycetes; Myrmecridium	Myrmecridium banksiae	1196437	JX069871	NR_111762	CBS:132536	CPC 19852			ex-holotype culture of Myrmecridium banksiae
764	Ewald Groenewald	Xenosonderhenia syzygii	complete ITS1_5.8S_ITS2	Yes	Eukaryota; Fungi; Dikarya; Ascomycota; Pezizomycotina; Dothideomycetes; Dothideomycetidae; Capnodiales; Mycosphaerellaceae; Xenosonderhenia	Xenosonderhenia syzygii	1196439	JX069872	NR_111763	CPC:19790	CPC 19790			ex-holotype culture of Xenosonderhenia syzygii
765	Ewald Groenewald	Pilidiella wangiensis	complete ITS1_5.8S_ITS2		Eukaryota; Fungi; Dikarya; Ascomycota; Pezizomycotina; Sordariomycetes; Sordariomycetidae; Diaporthales; Melanconidaceae; Schizoparme complex; mitosporic Schizoparme; Pilidiella	Pilidiella wangiensis	1196440	JX069873	NR_111764	CBS:132530	CPC 19397			ex-holotype culture of Pilidiella wangensis
766	Ewald Groenewald	Toxicocladosporium strelitziae	complete ITS1_5.8S_ITS2		Eukaryota; Fungi; Dikarya; Ascomycota; Pezizomycotina; Dothideomycetes; Dothideomycetidae; Capnodiales; Davidiellaceae; mitosporic Davidiellaceae; Toxicocladosporium	Toxicocladosporium strelitziae	1196441	JX069874	NR_111765	CBS:132535	CPC 19762			ex-holotype culture of Toxicocladosporium strelitziae
767	Ewald Groenewald	Devriesia agapanthi	only ITS1_5.8S complete, ITS2 partial		Eukaryota; Fungi; Dikarya; Ascomycota; Pezizomycotina; Dothideomycetes; Dothideomycetidae; Capnodiales; Teratosphaeriaceae; mitosporic Teratosphaeriaceae; Devriesia	Devriesia agapanthi	1196442	JX069875	NR_111766	CPC:19833	CPC 19833			ex-holotype culture of Devriesia agapanthi
768	Cathie Aime	Sporobolomyces corallinus	complete ITS1_5.8S_ITS2		Eukaryota; Fungi; Dikarya; Basidiomycota; Pucciniomycotina; Agaricostilbomycetes; Agaricostilbomycetes incertae sedis; mitosporic Agaricostilbomycetidae; Sporobolomyces	Sporobolomyces corallinus	1287045	AB638335		MAFF:654003	No. 6;MAFF 654003			ex-holotype culture of Sporobolomyces corallinus
769	Cathie Aime	Sporobolomyces productus	complete ITS1_5.8S_ITS2		Eukaryota; Fungi; Dikarya; Basidiomycota; Pucciniomycotina; Agaricostilbomycetes; Agaricostilbomycetes incertae sedis; mitosporic Agaricostilbomycetidae; Sporobolomyces	Sporobolomyces productus	1287044	AB638334		MAFF:654001	No. 3;MAFF 654001			ex-holotype culture of Sporobolomyces productus
770	María P. Martín et al.	Hydnum vesterholtii	only 5.8S_ITS2 complete, ITS1 partial	Yes	Eukaryota; Fungi; Dikarya; Basidiomycota; Agaricomycotina; Agaricomycetes; Cantharellales; Hydnaceae; Hydnum	Hydnum vesterholtii	1113479	HE611087					BIO:Fungi:12904	holotype of Hydnum vesterholtii
771	María P. Martín et al.	Hydnum ovoideisporum	only 5.8S_ITS2 complete, ITS1 partial	Yes	Eukaryota; Fungi; Dikarya; Basidiomycota; Agaricomycotina; Agaricomycetes; Cantharellales; Hydnaceae; Hydnum	Hydnum ovoideisporum	1113478	HE611081					BIO:Fungi:12683	holotype of Hydnum ovoideisporum
772	UBC / Nicolas Feau	Tuber oregonense	complete ITS1_5.8S_ITS2	Yes	Eukaryota; Fungi; Dikarya; Ascomycota; Pezizomycotina; Pezizomycetes; Pezizales; Tuberaceae; Tuber	Tuber oregonense	692102	FJ809874					DUKE:GB284	holotype of Tuber oregonense
774	UBC / Nicolas Feau	Tuber anniae	only 5.8S_ITS2 complete, ITS1 partial	Yes	Eukaryota; Fungi; Dikarya; Ascomycota; Pezizomycotina; Pezizomycetes; Pezizales; Tuberaceae; Tuber	Tuber anniae	880601	HM485338			JT13209		OSC:58992	holotype of Tuber anniae
775	UBC / Nicolas Feau	Tuber castellanoi	complete ITS1_5.8S_ITS2		Eukaryota; Fungi; Dikarya; Ascomycota; Pezizomycotina; Pezizomycetes; Pezizales; Tuberaceae; Tuber	Tuber castellanoi	692100	FJ809860			JT28069		OSC:131470	holotype of Tuber castellanoi
776	UBC / Nicolas Feau	Tuber gennadii	only 5.8S_ITS2 complete, ITS1 partial		Eukaryota; Fungi; Dikarya; Ascomycota; Pezizomycotina; Pezizomycetes; Pezizales; Tuberaceae; Tuber	Tuber gennadii	941351	HM485360			JT9627		OSC:48212	paratype of Tuber gennadii
777	UBC / Nicolas Feau	Tuber multimaculatum	only 5.8S_ITS2 complete, ITS1 partial	Yes	Eukaryota; Fungi; Dikarya; Ascomycota; Pezizomycotina; Pezizomycetes; Pezizales; Tuberaceae; Tuber	Tuber multimaculatum	941355	HM485377					OSC:62169	paratype of Tuber multimaculatum
778	UBC / Nicolas Feau	Tuber regimontanum	only 5.8S_ITS2 complete, ITS1 partial	Yes	Eukaryota; Fungi; Dikarya; Ascomycota; Pezizomycotina; Pezizomycetes; Pezizales; Tuberaceae; Tuber	Tuber regimontanum	512386	EU375838					ITCV:909	holotype of Tuber regimontanum
779	UBC / Nicolas Feau	Tuber mexiusanum	only 5.8S_ITS2 complete, ITS1 partial	Yes	Eukaryota; Fungi; Dikarya; Ascomycota; Pezizomycotina; Pezizomycetes; Pezizales; Tuberaceae; Tuber	Tuber mexiusanum	1143252	HM485411					ITCV:181	holotype of Tuber mexiusanum
782	UBC / Nicolas Feau	Tuber whetstonense	only 5.8S_ITS2 complete, ITS1 partial	Yes	Eukaryota; Fungi; Dikarya; Ascomycota; Pezizomycotina; Pezizomycetes; Pezizales; Tuberaceae; Tuber	Tuber whetstonense	304851	HM485392			JT25783		OSC:111919	paratype of Tuber whetstonense
783	UBC / Nicolas Feau	Tuber lauryi	only 5.8S_ITS2 complete, ITS1 partial		Eukaryota; Fungi; Dikarya; Ascomycota; Pezizomycotina; Pezizomycetes; Pezizales; Tuberaceae; Tuber	Tuber lauryi	941352	HM485365			JT19425		OSC:130885	holotype of Tuber lauryi
784	UBC / Nicolas Feau	Tuber miquihuanense	only 5.8S_ITS2 complete, ITS1 partial		Eukaryota; Fungi; Dikarya; Ascomycota; Pezizomycotina; Pezizomycetes; Pezizales; Tuberaceae; Tuber	Tuber miquihuanense	1143250	HM485414					ITCV:885	holotype of Tuber miquihuanense
786	UBC / Nicolas Feau	Tuber beyerlei	only 5.8S_ITS2 complete, ITS1 partial	Yes	Eukaryota; Fungi; Dikarya; Ascomycota; Pezizomycotina; Pezizomycetes; Pezizales; Tuberaceae; Tuber	Tuber beyerlei	1143248	HM485408			JT32597		OSC:130875	holotype of Tuber beyerlei	1
787	UBC / Nicolas Feau	Tuber castilloi	complete ITS1_5.8S_ITS2		Eukaryota; Fungi; Dikarya; Ascomycota; Pezizomycotina; Pezizomycetes; Pezizales; Tuberaceae; Tuber	Tuber castilloi	1196313	HM485403					ITCV:149	holotype of Tuber castilloi
788	UBC / Nicolas Feau	Tuber latisporum	complete ITS1_5.8S_ITS2		Eukaryota; Fungi; Dikarya; Ascomycota; Pezizomycotina; Pezizomycetes; Pezizales; Tuberaceae; Tuber	Tuber latisporum	409377	DQ898183			T1		HKAS:44315	holotype of Tuber latisporum
790	UBC / Nicolas Feau	Tuber zhongdianense	complete ITS1_5.8S_ITS2		Eukaryota; Fungi; Dikarya; Ascomycota; Pezizomycotina; Pezizomycetes; Pezizales; Tuberaceae; Tuber	Tuber zhongdianense	409376	DQ898187			T20		HKAS:Wang-0299	holotype of Tuber zhongdianense
791	S. Hambleton	Coniosporium apollinis	complete ITS1_5.8S_ITS2		Eukaryota; Fungi; Dikarya; Ascomycota; Pezizomycotina; Eurotiomycetes; Chaetothyriomycetidae; Chaetothyriales; Herpotrichiellaceae; mitosporic Herpotrichiellaceae; Coniosporium	Coniosporium apollinis	61459	JN040508		CBS:352.97	CBS 352.97			ex-type culture of Coniosporium apollinis
792	Cecile Gueidan	Knufia petricola	complete ITS1_5.8S_ITS2	Yes	Eukaryota; Fungi; Dikarya; Ascomycota; Pezizomycotina; Eurotiomycetes; Chaetothyriomycetidae; Chaetothyriales; Chaetothyriaceae; mitosporic Chaetothyriaceae; Knufia	Knufia petricola	206542	KC978746	NR_111871	CBS:726.95	CBS 726.95			ex-type culture of Sarcinomyces petricola
793	S. Hambleton	Knufia cryptophialidica	complete ITS1_5.8S_ITS2		Eukaryota; Fungi; Dikarya; Ascomycota; Pezizomycotina; Eurotiomycetes; Chaetothyriomycetidae; Chaetothyriales; Chaetothyriaceae; mitosporic Chaetothyriaceae; Knufia	Knufia cryptophialidica	431000	JN040501		DAOM:216555	DAOM 216555			ex-type culture of Knufia cryptophialidica
794	S. Hambleton	Knufia endospora	complete ITS1_5.8S_ITS2	Yes	Eukaryota; Fungi; Dikarya; Ascomycota; Pezizomycotina; Eurotiomycetes; Chaetothyriomycetidae; Chaetothyriales; Chaetothyriaceae; mitosporic Chaetothyriaceae; Knufia	Knufia endospora	1073329	JN040510	NR_111634	UAMH:10396	UAMH 10396			ex-type culture of Knufia endospora
795		Knufia epidermidis	only 5.8S complete, ITS1&2 partial	Yes	Eukaryota; Fungi; Dikarya; Ascomycota; Pezizomycotina; Eurotiomycetes; Chaetothyriomycetidae; Chaetothyriales; Chaetothyriaceae; mitosporic Chaetothyriaceae; Knufia	Knufia epidermidis	535988	EU730589	NR_111330	CBS:120353	CBS 120353			ex-type culture of Coniosporium epidermidis
796	S. Hambleton	Knufia perforans	complete ITS1_5.8S_ITS2	Yes	Eukaryota; Fungi; Dikarya; Ascomycota; Pezizomycotina; Eurotiomycetes; Chaetothyriomycetidae; Chaetothyriales; Chaetothyriaceae; mitosporic Chaetothyriaceae; Knufia	Knufia perforans	61460	JN040506		CBS:885.95	CBS 885.95			ex-type culture of Coniosporium perforans
797	S. Hambleton	Phaeococcomyces catenatus	complete ITS1_5.8S_ITS2	Yes	Eukaryota; Fungi; Dikarya; Ascomycota; Pezizomycotina; Arthoniomycetes; Lichenostigmatales; Phaeococcomycetaceae; Phaeococcomyces	Phaeococcomyces catenatus	86052	JN040512	NR_111635	UAMH:4357	UAMH 4357			ex-type culture of Phaeococcomyces catenatus
798	S. Hambleton	Phaeococcomyces nigricans	complete ITS1_5.8S_ITS2	Yes	Eukaryota; Fungi; Dikarya; Ascomycota; Pezizomycotina; Arthoniomycetes; Lichenostigmatales; Phaeococcomycetaceae; Phaeococcomyces	Phaeococcomyces nigricans	86053	JN040513	NR_111636	UAMH:4084	UAMH 4084			ex-type culture of Cryptococcus nigricans
799	S. Hambleton	Sarcinomyces crustaceus	complete ITS1_5.8S_ITS2		Eukaryota; Fungi; Dikarya; Ascomycota; Pezizomycotina; Eurotiomycetes; Chaetothyriomycetidae; Chaetothyriales; mitosporic Chaetothyriales; Sarcinomyces	Sarcinomyces crustaceus	62075	JN040515		UAMH:4286	UAMH 4286			ex-type culture of Sarcinomyces crustaceus
800		Chaenothecopsis diabolica	complete ITS1_5.8S_ITS2		Eukaryota; Fungi; Dikarya; Ascomycota; Pezizomycotina; Eurotiomycetes; Mycocaliciomycetidae; Mycocaliciales; Mycocaliciaceae; Chaenothecopsis	Chaenothecopsis diabolica	1284360	JX119109					H:Tuovila 06-035	paratype of Chaenothecopsis diabolica
801		Chaenothecopsis khayensis	complete ITS1_5.8S_ITS2		Eukaryota; Fungi; Dikarya; Ascomycota; Pezizomycotina; Eurotiomycetes; Mycocaliciomycetidae; Mycocaliciales; Mycocaliciaceae; Chaenothecopsis	Chaenothecopsis khayensis	1033982	JX122785					H:JR 04G058	holotype of Chaenothecopsis khayensis
802		Spongiforma squarepantsii	only 5.8S_ITS2 complete, ITS1 partial	Yes	Eukaryota; Fungi; Dikarya; Basidiomycota; Agaricomycotina; Agaricomycetes; Agaricomycetidae; Boletales; Boletineae; Boletaceae; Spongiforma	Spongiforma squarepantsii	942147	HQ724511					UC<USA-CA>:1860255	holotype of Spongiforma squarepantsii
803		Spongiforma thailandica	only ITS1_5.8S complete, ITS2 partial	Yes	Eukaryota; Fungi; Dikarya; Basidiomycota; Agaricomycotina; Agaricomycetes; Agaricomycetidae; Boletales; Boletineae; Boletaceae; Spongiforma	Spongiforma thailandica	554319	EU685113			DED7873		BBH:DED 7873	holotype of Spongiforma thailandica	1
804	María P. Martín et al.	Umbilicaria iberica	complete ITS1_5.8S_ITS2		Eukaryota; Fungi; Dikarya; Ascomycota; Pezizomycotina; Lecanoromycetes; Lecanoromycetes incertae sedis; Umbilicariales; Umbilicariaceae; Umbilicaria	Umbilicaria iberica	619691	FN185965			U. iberica 2		KRAM:L 50627	holotype of Umbilicaria iberica
805	María P. Martín et al.	Umbilicaria maculata	complete ITS1_5.8S_ITS2		Eukaryota; Fungi; Dikarya; Ascomycota; Pezizomycotina; Lecanoromycetes; Lecanoromycetes incertae sedis; Umbilicariales; Umbilicariaceae; Umbilicaria	Umbilicaria maculata	619692	FN185970			U. maculata 4		KRAM:L 53238	holotype of Umbilicaria maculata
807	María P. Martín et al.	Rhizopogon graveolens f. pomaceus	only 5.8S_ITS2 complete, ITS1 partial	Yes	Eukaryota; Fungi; Dikarya; Basidiomycota; Agaricomycotina; Agaricomycetes; Agaricomycetidae; Boletales; Suillineae; Rhizopogonaceae; Rhizopogon	Rhizopogon graveolens f. pomaceus	418988	AJ810037			POMRHI-1		PRM:619028	isotype of Rhizopogon graveolens f. pomaceus
808	María P. Martín et al.	Rhizopogon luteorubescens	only 5.8S_ITS2 complete, ITS1 partial	Yes	Eukaryota; Fungi; Dikarya; Basidiomycota; Agaricomycotina; Agaricomycetes; Agaricomycetidae; Boletales; Suillineae; Rhizopogonaceae; Rhizopogon	Rhizopogon luteorubescens	418989	AJ810038			LRURHI-H; AHS 58778		MICH:5462	holotype of Rhizopogon luteorubescens
810	María P. Martín et al.	Rhizopogon rubescens var. pallidimaculatus	only 5.8S_ITS2 complete, ITS1 partial	Yes	Eukaryota; Fungi; Dikarya; Basidiomycota; Agaricomycotina; Agaricomycetes; Agaricomycetidae; Boletales; Suillineae; Rhizopogonaceae; Rhizopogon	Rhizopogon rubescens var. pallidimaculatus	418992	AJ810043			PALRHI-1		MICH:607;personal:AH Smith:58821a	paratype of Rhizopogon rubescens var. pallidimaculatus
812	María P. Martín et al.	Hypochnicium michelii	only 5.8S_ITS2 complete, ITS1 partial		Eukaryota; Fungi; Dikarya; Basidiomycota; Agaricomycotina; Agaricomycetes; Corticiales; Corticiaceae; Hypochnicium	Hypochnicium michelii	676207	FN552535					MA:Fungi:79155	holotype of Hypochnicium michelii
813	María P. Martín et al.	Hypochnicium guineense	only 5.8S complete, ITS1&2 partial		Eukaryota; Fungi; Dikarya; Basidiomycota; Agaricomycotina; Agaricomycetes; Corticiales; Corticiaceae; Hypochnicium	Hypochnicium guineense	676209	FN552536					MA:Fungi:79156	holotype of Hypochnicium guineensis	2
816	María P. Martín et al.	Sistotremastrum guttuliferum	only 5.8S_ITS2 complete, ITS1 partial	Yes	Eukaryota; Fungi; Dikarya; Basidiomycota; Agaricomycotina; Agaricomycetes; Trechisporales; 'Trechisporaceae'; Sistotremastrum	Sistotremastrum guttuliferum	1290441	JX310445					MA:Fungi:82105	holotype of Sistotremastrum guttuliferum
817		Boletus chippewaensis	only 5.8S complete, ITS1&2 partial		Eukaryota; Fungi; Dikarya; Basidiomycota; Agaricomycotina; Agaricomycetes; Agaricomycetidae; Boletales; Boletineae; Boletaceae; Boletus	Boletus chippewaensis	495276	EU231976			AHS71914		MICH:10007	holotype of Boletus chippewaensis	1
819		Boletus hiratsukae	only 5.8S complete, ITS1&2 partial		Eukaryota; Fungi; Dikarya; Basidiomycota; Agaricomycotina; Agaricomycetes; Agaricomycetidae; Boletales; Boletineae; Boletaceae; Boletus	Boletus hiratsukae	495281	EU231960					TMI:18352	holotype of Boletus hiratsukae
820		Beauveria lii	complete ITS1_5.8S_ITS2	Yes	Eukaryota; Fungi; Dikarya; Ascomycota; Pezizomycotina; Sordariomycetes; Hypocreomycetidae; Hypocreales; Cordycipitaceae; mitosporic Cordycipitaceae; Beauveria	Beauveria lii	1290591	JN689372	NR_111678	ARSEF:11741	RCEF5500			ex-holotype culture of Beauveria lii
821		Neonectria major	complete ITS1_5.8S_ITS2		Eukaryota; Fungi; Dikarya; Ascomycota; Pezizomycotina; Sordariomycetes; Hypocreomycetidae; Hypocreales; Nectriaceae; Neonectria	Neonectria major	992237	JF735308		CBS:240.29	CBS 240.29			ex-type culture of Nectria ditissima var. major
822	Ewald Groenewald	Pestalotiopsis adusta	only 5.8S_ITS2 complete, ITS1 partial	Yes	Eukaryota; Fungi; Dikarya; Ascomycota; Pezizomycotina; Sordariomycetes; Xylariomycetidae; Xylariales; Amphisphaeriaceae; mitosporic Amphisphaeriaceae; Pestalotiopsis	Pestalotiopsis adusta	173179	JX399006	NR_111788	ICMP:6088	ICMP 6088			ex-epitype culture of Pestalotiopsis adusta
823	Ewald Groenewald	Pestalotiopsis chinensis	only 5.8S_ITS2 complete, ITS1 partial	Yes	Eukaryota; Fungi; Dikarya; Ascomycota; Pezizomycotina; Sordariomycetes; Xylariomycetidae; Xylariales; Amphisphaeriaceae; mitosporic Amphisphaeriaceae; Pestalotiopsis	Pestalotiopsis chinensis	1235604	JX398995	NR_111786	MFLUCC:12-0273	MFLUCC 12-0273			ex-holotype culture of Pestalotiopsis chinensis
824	Ewald Groenewald	Pestalotiopsis chrysea	only 5.8S_ITS2 complete, ITS1 partial	Yes	Eukaryota; Fungi; Dikarya; Ascomycota; Pezizomycotina; Sordariomycetes; Xylariomycetidae; Xylariales; Amphisphaeriaceae; mitosporic Amphisphaeriaceae; Pestalotiopsis	Pestalotiopsis chrysea	1235563	JX398985	NR_111784	MFLUCC:12-0261	MFLUCC 12-0261			ex-holotype culture of Pestalotiopsis chrysea
825		Boletus variipes var. fagicola	only 5.8S complete, ITS1&2 partial		Eukaryota; Fungi; Dikarya; Basidiomycota; Agaricomycotina; Agaricomycetes; Agaricomycetidae; Boletales; Boletineae; Boletaceae; Boletus	Boletus variipes var. fagicola	495287	EU231962			AHS75914		MICH:10063	holotype of Boletus variipes var. fagicola	2
826		Boletus subalpinus	only 5.8S complete, ITS1&2 partial		Eukaryota; Fungi; Dikarya; Basidiomycota; Agaricomycotina; Agaricomycetes; Agaricomycetidae; Boletales; Boletineae; Boletaceae; Boletus	Boletus subalpinus	1355149	EU231989			Trappe 607		MICH:5399	isotype of Gastroboletus subalpinus
827	Ewald Groenewald	Pestalotiopsis clavispora	only 5.8S_ITS2 complete, ITS1 partial	Yes	Eukaryota; Fungi; Dikarya; Ascomycota; Pezizomycotina; Sordariomycetes; Xylariomycetidae; Xylariales; Amphisphaeriaceae; mitosporic Amphisphaeriaceae; Pestalotiopsis	Pestalotiopsis clavispora	289240	JX398979	NR_111782	MFLUCC:12-0281	MFLUCC 12-0281			ex-epitype culture of Pestalotiopsis clavispora
828	Ewald Groenewald	Pestalotiopsis foedans	only 5.8S_ITS2 complete, ITS1 partial	Yes	Eukaryota; Fungi; Dikarya; Ascomycota; Pezizomycotina; Sordariomycetes; Xylariomycetidae; Xylariales; Amphisphaeriaceae; mitosporic Amphisphaeriaceae; Pestalotiopsis	Pestalotiopsis foedans	290095	JX398987	NR_111785	CGMCC:3.9123	CGMCC 3.9123			ex-epitype culture of Pestalotiopsis foedans
829	Ewald Groenewald	Pestalotiopsis umbrinospora	only 5.8S_ITS2 complete, ITS1 partial	Yes	Eukaryota; Fungi; Dikarya; Ascomycota; Pezizomycotina; Sordariomycetes; Xylariomycetidae; Xylariales; Amphisphaeriaceae; mitosporic Amphisphaeriaceae; Pestalotiopsis	Pestalotiopsis umbrinospora	1415906	JX398984	NR_111783	MFLUCC:12-0285	MFLUCC 12-0285			ex-holotype culture of Pestalotiopsis umberspora
830	Sajeewa Maharachchikumbura	Pestalotiopsis theae	only 5.8S_ITS2 complete, ITS1 partial	Yes	Eukaryota; Fungi; Dikarya; Ascomycota; Pezizomycotina; Sordariomycetes; Xylariomycetidae; Xylariales; Amphisphaeriaceae; mitosporic Amphisphaeriaceae; Pestalotiopsis	Pestalotiopsis theae	218556	JQ683727	NR_111716	MFLUCC:12-0055	MFLUCC 12-0055			ex-holotype culture of Pestalotiopsis theae
831		Psilocybe allenii	only 5.8S_ITS2 complete, ITS1 partial	Yes	Eukaryota; Fungi; Dikarya; Basidiomycota; Agaricomycotina; Agaricomycetes; Agaricomycetidae; Agaricales; Strophariaceae; Psilocybe	Psilocybe allenii	1234797	HE994440		PRM:899876	P26			ex-holotype culture of Psilocybe allenii
832		Psilocybe cyanescens	only 5.8S_ITS2 complete, ITS1 partial	Yes	Eukaryota; Fungi; Dikarya; Basidiomycota; Agaricomycotina; Agaricomycetes; Agaricomycetidae; Agaricales; Strophariaceae; Psilocybe	Psilocybe cyanescens	93625	GU565175	NR_111478	PRM:901481				ex-epitype culture of Psilocybe cyanescens
834	Cathie Aime	Puccinia coronati-japonica	only 5.8S_ITS2 complete, ITS1 partial		Eukaryota; Fungi; Dikarya; Basidiomycota; Pucciniomycotina; Pucciniomycetes; Pucciniales; Pucciniaceae; Puccinia	Puccinia coronati-japonica	862462	HM131317	NR_111527	PUR:F16131	PUR F16131			ex-holotype culture of Puccinia coronati-japonica
837	Cathie Aime	Puccinia coronati-brevispora	only 5.8S_ITS2 complete, ITS1 partial		Eukaryota; Fungi; Dikarya; Basidiomycota; Pucciniomycotina; Pucciniomycetes; Pucciniales; Pucciniaceae; Puccinia	Puccinia coronati-brevispora	862456	HM131235	NR_111526	PUR:N652	PUR N652			ex-holotype culture of Puccinia coronati-brevispora
838	Cathie Aime	Puccinia coronati-agrostidis	only 5.8S_ITS2 complete, ITS1 partial		Eukaryota; Fungi; Dikarya; Basidiomycota; Pucciniomycotina; Pucciniomycetes; Pucciniales; Pucciniaceae; Puccinia	Puccinia coronati-agrostidis	862460	HM131319	NR_111528	PUR:N114	PUR N114			ex-holotype culture of Puccinia coronati-agrostidis	1
841		Basidiobolus heterosporus	only 5.8S complete, ITS1&2 partial	Yes	Eukaryota; Fungi; Entomophthoromycota; Basidiobolomycetes; Basidiobolales; Basidiobolaceae; Basidiobolus	Basidiobolus heterosporus	423455	EF392536	NR_111241	ATCC:16580	ATCC 16580			ex-type culture of Basidiobolus heterosporus
842		Basidiobolus haptosporus var. minor	only 5.8S_ITS2 complete, ITS1 partial	Yes	Eukaryota; Fungi; Entomophthoromycota; Basidiobolomycetes; Basidiobolales; Basidiobolaceae; Basidiobolus	Basidiobolus haptosporus var. minor	423454	EF392535	NR_111240	ATCC:16579	ATCC 16579			ex-type culture of Basidiobolus haptosporus var. minor
844		Quambalaria pitereka	only 5.8S complete, ITS1&2 partial	Yes	Eukaryota; Fungi; Dikarya; Basidiomycota; Ustilaginomycotina; Exobasidiomycetes; Microstromatales; Quambalariaceae; Quambalaria	Quambalaria pitereka	363178	EF427376	NR_111242	DAR:19773	DAR 19773			ex-holotype culture of Quambalaria pitereka
845		Quambalaria cyanescens	only 5.8S complete, ITS1&2 partial	Yes	Eukaryota; Fungi; Dikarya; Basidiomycota; Ustilaginomycotina; Exobasidiomycetes; Microstromatales; Quambalariaceae; Quambalaria	Quambalaria cyanescens	345902	DQ119135	NR_111202	CBS:357.73	CBS 357.73			ex-holotype culture of Sporothrix cyanescens
846		Quambalaria eucalypti	only 5.8S complete, ITS1&2 partial	Yes	Eukaryota; Fungi; Dikarya; Basidiomycota; Ustilaginomycotina; Exobasidiomycetes; Microstromatales; Quambalariaceae; Quambalaria	Quambalaria eucalypti	363177	DQ317625	NR_111214	CBS:118844	CMW 1101			ex-type culture of Quambalaria eucalypti
848	Cathie Aime	Sympodiomycopsis paphiopedili	only 5.8S complete, ITS1&2 partial	Yes	Eukaryota; Fungi; Dikarya; Basidiomycota; Ustilaginomycotina; Exobasidiomycetes; Microstromatales; Microstromatales incertae sedis; Sympodiomycopsis	Sympodiomycopsis paphiopedili	37782	DQ317631	NR_111215	CBS:7429	CBS 7429			ex-type culture of Sympodiomycopsis paphiopedili
849	Cathie Aime	Tilletiopsis pallescens	only 5.8S complete, ITS1&2 partial	Yes	Eukaryota; Fungi; Dikarya; Basidiomycota; Ustilaginomycotina; Exobasidiomycetes; Entylomatales; Entylomataceae; mitosporic Entylomataceae; Tilletiopsis	Tilletiopsis pallescens	58918	DQ317636	NR_111216	CBS:606.83	CBS 606.83			ex-type culture of Tilletiopsis pallescens
851	Marieka Gryzenhout	Latruncellus aurorae	only 5.8S complete, ITS1&2 partial		Eukaryota; Fungi; Dikarya; Ascomycota; Pezizomycotina; Sordariomycetes; Sordariomycetidae; Diaporthales; Cryphonectriaceae; Cryphonectria-Endothia complex; Latruncellus	Latruncellus aurorae	977970	GU726947		CBS:125526	CMW 28276		PREM:60348	ex-holotype culture of Latruncellus aurorae
852	UBC / Nicolas Feau	Tuber liyuanum	only 5.8S_ITS2 complete, ITS1 partial		Eukaryota; Fungi; Dikarya; Ascomycota; Pezizomycotina; Pezizomycetes; Pezizales; Tuberaceae; Tuber	Tuber liyuanum	1255164	JQ771191	NR_111717	BJTC:FAN 162	FAN162			ex-holotype culture of Tuber liyuanum
853	UBC / Nicolas Feau	Tuber pseudomagnatum	only 5.8S_ITS2 complete, ITS1 partial		Eukaryota; Fungi; Dikarya; Ascomycota; Pezizomycotina; Pezizomycetes; Pezizales; Tuberaceae; Tuber	Tuber pseudomagnatum	1255165	JQ771192	NR_111718	BJTC:FAN 163	FAN163			ex-holotype culture of Tuber pseudomaganatum
854	Cathie Aime	Meira miltonrushii	complete ITS1_5.8S_ITS2		Eukaryota; Fungi; Dikarya; Basidiomycota; Ustilaginomycotina; Exobasidiomycetes; Exobasidiales; Brachybasidiaceae; Meira	Meira miltonrushii	1280837	JX432963		ATCC:MYA-4883;CBS:12591	MCA 3882		NRRL:Y-48820	ex-holotype culture of Meira miltonrushii
855	Cathie Aime	Meira nashicola	only 5.8S_ITS2 complete, ITS1 partial	Yes	Eukaryota; Fungi; Dikarya; Basidiomycota; Ustilaginomycotina; Exobasidiomycetes; Exobasidiales; Brachybasidiaceae; Meira	Meira nashicola	286112	AB185159		CBS:117161;MAFF:230028	PFS 002			ex-holotype culture of Meira nashicola
856		Antherospora tractemae	complete ITS1_5.8S_ITS2		Eukaryota; Fungi; Dikarya; Basidiomycota; Ustilaginomycotina; Ustilaginomycetes; Urocystales; Floromycetaceae; Antherospora	Antherospora tractemae	1162323	JN204283					KRAM:F-48879	holotype of Antherospora tractemae
857		Aporpium macroporum	complete ITS1_5.8S_ITS2		Eukaryota; Fungi; Dikarya; Basidiomycota; Agaricomycotina; Tremellomycetes; Tremellales; Aporpiaceae; Aporpium	Aporpium macroporum	1214905	JX044148			X1802		H:7005697	holotype of Aporpium macroporum	3
858	Conrad Schoch	Apiorhynchostoma curreyi	only 5.8S complete, ITS1&2 partial		Eukaryota; Fungi; Dikarya; Ascomycota; Pezizomycotina; Sordariomycetes; Sordariomycetidae; Boliniales; Boliniaceae; Apiorhynchostoma	Apiorhynchostoma curreyi	1289956	JX460984		UAMH:11088	UAMH 11088			verified
859	Conrad Schoch	Endoxyla macrostoma	only 5.8S complete, ITS1&2 partial		Eukaryota; Fungi; Dikarya; Ascomycota; Pezizomycotina; Sordariomycetes; Sordariomycetidae; Boliniales; Boliniaceae; Endoxyla	Endoxyla macrostoma	1289958	JX460985		UAMH:11491	UAMH 11491			verified
860		Endoxyla mallochii	only 5.8S complete, ITS1&2 partial		Eukaryota; Fungi; Dikarya; Ascomycota; Pezizomycotina; Sordariomycetes; Sordariomycetidae; Boliniales; Boliniaceae; Endoxyla	Endoxyla mallochii	1289962	JX460986	NR_111790	UAMH:11087	UAMH 11087			ex-holotype culture of Endoxyla mallochii
861	Conrad Schoch	Endoxyla operculata	only 5.8S complete, ITS1&2 partial		Eukaryota; Fungi; Dikarya; Ascomycota; Pezizomycotina; Sordariomycetes; Sordariomycetidae; Boliniales; Boliniaceae; Endoxyla	Endoxyla operculata	1289959	JX460987		UAMH:11085	UAMH 11085			verified
862	Conrad Schoch	Pseudovalsaria ferruginea	only 5.8S complete, ITS1&2 partial		Eukaryota; Fungi; Dikarya; Ascomycota; Pezizomycotina; Sordariomycetes; Sordariomycetidae; Boliniales; Boliniaceae; Pseudovalsaria	Pseudovalsaria ferruginea	1289961	JX460988		UAMH:11490	UAMH 11490			verified
863	Cathie Aime	Meredithblackwellia eburnea	complete ITS1_5.8S_ITS2		Eukaryota; Fungi; Dikarya; Basidiomycota; Pucciniomycotina; Microbotryomycetes; Kriegeriales; Kriegeriaceae; Meredithblackwellia	Meredithblackwellia eburnea	1323573	JX508799		CBS:12589	MCA4105		NRRL:Y-48821	ex-holotype culture of Meredithblackwellia eburnea
864		Anhellia nectandrae	complete ITS1_5.8S_ITS2		Eukaryota; Fungi; Dikarya; Ascomycota; Pezizomycotina; Dothideomycetes; Dothideomycetidae; Myriangiales; Myriangiaceae; Anhellia	Anhellia nectandrae	1169555	JQ071524	NR_111700	VIC:31767	VIC 31767			ex-holotype culture of Anhellia nectandrae
865		Lobariella angustata	only 5.8S complete, ITS1&2 partial	Yes	Eukaryota; Fungi; Dikarya; Ascomycota; Pezizomycotina; Lecanoromycetes; Lecanoromycetidae; Peltigerales; Peltigerineae; Lobariaceae; Lobariella	Lobariella angustata	1283096	KC011030			DNA6193		UDBC:Vargas & Herrera 310a	holotype of Lobariella angustata
866		Lobariella auriculata	only 5.8S complete, ITS1&2 partial	Yes	Eukaryota; Fungi; Dikarya; Ascomycota; Pezizomycotina; Lecanoromycetes; Lecanoromycetidae; Peltigerales; Peltigerineae; Lobariaceae; Lobariella	Lobariella auriculata	1283097	KC011032			DNA5517		UDBC:Moncada 3075	holotype of Lobariella auriculata
867		Lobariella pallidocrenulata	only 5.8S complete, ITS1&2 partial	Yes	Eukaryota; Fungi; Dikarya; Ascomycota; Pezizomycotina; Lecanoromycetes; Lecanoromycetidae; Peltigerales; Peltigerineae; Lobariaceae; Lobariella	Lobariella pallidocrenulata	1283094	KC011050			DNA5514		UDBC:Moncada 3164a	holotype of Lobariella pallidocrenulata
868		Lobariella pseudocrenulata	only 5.8S complete, ITS1&2 partial		Eukaryota; Fungi; Dikarya; Ascomycota; Pezizomycotina; Lecanoromycetes; Lecanoromycetidae; Peltigerales; Peltigerineae; Lobariaceae; Lobariella	Lobariella pseudocrenulata	1283101	KC011061			DNA6176		UDBC:Vargas & Herrera 309b	holotype of Lobariella pseudocrenulata
869		Lobariella reticulata	only 5.8S complete, ITS1&2 partial	Yes	Eukaryota; Fungi; Dikarya; Ascomycota; Pezizomycotina; Lecanoromycetes; Lecanoromycetidae; Peltigerales; Peltigerineae; Lobariaceae; Lobariella	Lobariella reticulata	1283095	KC011063			DNA6304		UDBC:Moncada 4982	holotype of Lobariella reticulata
870		Lobariella parmelioides	only 5.8S complete, ITS1&2 partial	Yes	Eukaryota; Fungi; Dikarya; Ascomycota; Pezizomycotina; Lecanoromycetes; Lecanoromycetidae; Peltigerales; Peltigerineae; Lobariaceae; Lobariella	Lobariella parmelioides	1283100	KC011060			DNA6223		UDBC:Moncada 5355	holotype of Lobariella parmelioides
871		Lobariella soredians	only 5.8S complete, ITS1&2 partial	Yes	Eukaryota; Fungi; Dikarya; Ascomycota; Pezizomycotina; Lecanoromycetes; Lecanoromycetidae; Peltigerales; Peltigerineae; Lobariaceae; Lobariella	Lobariella soredians	1283102	KC011067			DNA5381		UDBC:Moncada 4652	holotype of Lobariella soredians
872		Lobariella ecorticata	only 5.8S complete, ITS1&2 partial	Yes	Eukaryota; Fungi; Dikarya; Ascomycota; Pezizomycotina; Lecanoromycetes; Lecanoromycetidae; Peltigerales; Peltigerineae; Lobariaceae; Lobariella	Lobariella ecorticata	1283111	KC011035			DNA5516		UDBC:Moncada 3156	holotype of Lobariella ecorticata
873		Multifurca stenophylla	only 5.8S complete, ITS1&2 partial		Eukaryota; Fungi; Dikarya; Basidiomycota; Agaricomycotina; Agaricomycetes; Russulales; Russulaceae; Multifurca	Multifurca stenophylla	1304870	JX266632			TL2335		MEL:2352529	epitype of Multifurca stenophylla
874		Agaricus chartaceus	only 5.8S_ITS2 complete, ITS1 partial	Yes	Eukaryota; Fungi; Dikarya; Basidiomycota; Agaricomycotina; Agaricomycetes; Agaricomycetidae; Agaricales; Agaricaceae; Agaricus	Agaricus chartaceus	1301525	JF495048			H6271		PERTH:07582757	holotype of Agaricus chartaceus
875		Macrolepiota turbinata	complete ITS1_5.8S_ITS2	Yes	Eukaryota; Fungi; Dikarya; Basidiomycota; Agaricomycotina; Agaricomycetes; Agaricomycetidae; Agaricales; Agaricaceae; Macrolepiota	Macrolepiota turbinata	1081733	JF495076					PERTH:N. Malajczuk:H0219	holotype of Macrolepiota turbinata
877		Agaricus eburneocanus	only 5.8S_ITS2 complete, ITS1 partial	Yes	Eukaryota; Fungi; Dikarya; Basidiomycota; Agaricomycotina; Agaricomycetes; Agaricomycetidae; Agaricales; Agaricaceae; Agaricus	Agaricus eburneocanus	1081727	JF495062			H7528		PERTH:07626789	holotype of Agaricus eburneocanus
878		Agaricus erythrosarx	only 5.8S_ITS2 complete, ITS1 partial	Yes	Eukaryota; Fungi; Dikarya; Basidiomycota; Agaricomycotina; Agaricomycetes; Agaricomycetidae; Agaricales; Agaricaceae; Agaricus	Agaricus erythrosarx	1081728	JF495068					MURU:6080	holotype of Agaricus erythrosarx
879		Agaricus inilleasper	only 5.8S_ITS2 complete, ITS1 partial	Yes	Eukaryota; Fungi; Dikarya; Basidiomycota; Agaricomycotina; Agaricomycetes; Agaricomycetidae; Agaricales; Agaricaceae; Agaricus	Agaricus inilleasper	1081729	JF495067					PERTH:M. Castellano:H4452	holotype of Agaricus inilleasper
880		Mucor moelleri	only 5.8S_ITS2 complete, ITS1 partial	Yes	Eukaryota; Fungi; Fungi incertae sedis; Early diverging fungal lineages; Mucoromycotina; Mucorales; Mucorineae; Mucoraceae; Mucor	Mucor moelleri	1302847	JN206121	NR_111659	CBS:406.58	CBS 406.58			ex-neotype culture of Zygorhynchus moelleri
881		Polycephalomyces sinensis	complete ITS1_5.8S_ITS2	Yes	Eukaryota; Fungi; Dikarya; Ascomycota; Pezizomycotina; Sordariomycetes; Hypocreomycetidae; Hypocreales; Hypocreales incertae sedis; Polycephalomyces	Polycephalomyces sinensis	99896	HQ832884			CN 80-2		HMAS:43720	holotype of Polycephalomyces sinensis
882		Asteridiella obesa	only 5.8S complete, ITS1&2 partial	Yes	Eukaryota; Fungi; Dikarya; Ascomycota; Pezizomycotina; Sordariomycetes; Sordariomycetes incertae sedis; Meliolales; Meliolaceae; Asteridiella	Asteridiella obesa	1305656	KC252608					VIC:31239	holotype of Asteridiella obesa
884		Diaporthe alleghaniensis	complete ITS1_5.8S_ITS2	CATTG	Eukaryota; Fungi; Dikarya; Ascomycota; Pezizomycotina; Sordariomycetes; Sordariomycetidae; Diaporthales; Diaporthaceae; Diaporthe	Diaporthe alleghaniensis	699515	KC343007	NR_103696	CBS:495.72	CBS 495.72			ex-type culture of Diaporthe alleghaniensis
885		Diaporthe ampelina	only 5.8S complete, ITS1&2 partial		Eukaryota; Fungi; Dikarya; Ascomycota; Pezizomycotina; Sordariomycetes; Sordariomycetidae; Diaporthales; Diaporthaceae; Diaporthe	Diaporthe ampelina	1214573	AF230751		CBS:114016;STEU:2660	STE-U 2660			ex-neotype culture of Diaporthe ampelina
886		Diaporthe anacardii	complete ITS1_5.8S_ITS2	CATTG	Eukaryota; Fungi; Dikarya; Ascomycota; Pezizomycotina; Sordariomycetes; Sordariomycetidae; Diaporthales; Diaporthaceae; Diaporthe	Diaporthe anacardii	1304148	KC343024	NR_111841	CBS:720.97	CBS 720.97			ex-epitype culture of Diaporthe anacardii
887		Diaporthe arecae	complete ITS1_5.8S_ITS2	CATTG	Eukaryota; Fungi; Dikarya; Ascomycota; Pezizomycotina; Sordariomycetes; Sordariomycetidae; Diaporthales; Diaporthaceae; Diaporthe	Diaporthe arecae	1304151	KC343032	NR_111842	CBS:161.64	CBS 161.64			ex-holotype culture of Subramanella arecae
888		Diaporthe arengae	complete ITS1_5.8S_ITS2	CATTG	Eukaryota; Fungi; Dikarya; Ascomycota; Pezizomycotina; Sordariomycetes; Sordariomycetidae; Diaporthales; Diaporthaceae; Diaporthe	Diaporthe arengae	1304152	KC343034	NR_111843	CBS:114979	CBS 114979			ex-type culture of Diaporthe arengae
889		Diaporthe brasiliensis	complete ITS1_5.8S_ITS2	CATTG	Eukaryota; Fungi; Dikarya; Ascomycota; Pezizomycotina; Sordariomycetes; Sordariomycetidae; Diaporthales; Diaporthaceae; Diaporthe	Diaporthe brasiliensis	1304153	KC343042	NR_111844	CBS:133183	CBS 133183			ex-type culture of Diaporthe brasiliensis
890		Diaporthe caulivora	complete ITS1_5.8S_ITS2	CATTG	Eukaryota; Fungi; Dikarya; Ascomycota; Pezizomycotina; Sordariomycetes; Sordariomycetidae; Diaporthales; Diaporthaceae; Diaporthe	Diaporthe caulivora	60444	KC343045	NR_111845	CBS:127268	CBS 127268			ex-neotype culture of Diaporthe caulivora
891		Diaporthe crotalariae	complete ITS1_5.8S_ITS2	CATTG	Eukaryota; Fungi; Dikarya; Ascomycota; Pezizomycotina; Sordariomycetes; Sordariomycetidae; Diaporthales; Diaporthaceae; Diaporthe	Diaporthe crotalariae	699516	KC343056	NR_103697	CBS:162.33	CBS 162.33			ex-type culture of Diaporthe crotalariae
892		Diaporthe cynaroidis	complete ITS1_5.8S_ITS2	CATTG	Eukaryota; Fungi; Dikarya; Ascomycota; Pezizomycotina; Sordariomycetes; Sordariomycetidae; Diaporthales; Diaporthaceae; Diaporthe	Diaporthe cynaroidis	531879	KC343058	NR_111846	CBS:122676	CBS 122676			ex-type culture of Diaporthe cynaroidis
893		Diaporthe endophytica	complete ITS1_5.8S_ITS2	CATTG	Eukaryota; Fungi; Dikarya; Ascomycota; Pezizomycotina; Sordariomycetes; Sordariomycetidae; Diaporthales; Diaporthaceae; Diaporthe	Diaporthe endophytica	1303576	KC343065	NR_111847	CBS:133811	CBS 133811			ex-type culture of Diaporthe endophytica
894		Diaporthe ganjae	complete ITS1_5.8S_ITS2	CATTG	Eukaryota; Fungi; Dikarya; Ascomycota; Pezizomycotina; Sordariomycetes; Sordariomycetidae; Diaporthales; Diaporthaceae; Diaporthe	Diaporthe ganjae	1303578	KC343112		CBS:180.91	CBS 180.91			ex-type culture of Phomopsis ganjae
895		Diaporthe hickoriae	complete ITS1_5.8S_ITS2	CATTG	Eukaryota; Fungi; Dikarya; Ascomycota; Pezizomycotina; Sordariomycetes; Sordariomycetidae; Diaporthales; Diaporthaceae; Diaporthe	Diaporthe hickoriae	699517	KC343118	NR_103699	CBS:145.26	CBS 145.26			ex-type culture of Diaporthe hickoriae
896		Diaporthe hongkongensis	complete ITS1_5.8S_ITS2	CATTG	Eukaryota; Fungi; Dikarya; Ascomycota; Pezizomycotina; Sordariomycetes; Sordariomycetidae; Diaporthales; Diaporthaceae; Diaporthe	Diaporthe hongkongensis	1303581	KC343119	NR_111848	CBS:115448	CBS 115448			ex-type culture of Diaporthe hongkongensis
897		Diaporthe inconspicua	complete ITS1_5.8S_ITS2	CATTG	Eukaryota; Fungi; Dikarya; Ascomycota; Pezizomycotina; Sordariomycetes; Sordariomycetidae; Diaporthales; Diaporthaceae; Diaporthe	Diaporthe inconspicua	1303583	KC343123	NR_111849	CBS:133813	CBS 133813			ex-type culture of Diaporthe inconspicua
898		Diaporthe infecunda	complete ITS1_5.8S_ITS2	CATTG	Eukaryota; Fungi; Dikarya; Ascomycota; Pezizomycotina; Sordariomycetes; Sordariomycetidae; Diaporthales; Diaporthaceae; Diaporthe	Diaporthe infecunda	1303584	KC343126	NR_111850	CBS:133812	CBS 133812			ex-type culture of Diaporthe infecunda
899		Diaporthe longispora	complete ITS1_5.8S_ITS2	CATTG	Eukaryota; Fungi; Dikarya; Ascomycota; Pezizomycotina; Sordariomycetes; Sordariomycetidae; Diaporthales; Diaporthaceae; Diaporthe	Diaporthe longispora	699520	KC343135	NR_111851	CBS:194.36	CBS 194.36			ex-type culture of Diaporthe strumella var. longispora
900		Diaporthe mayteni	complete ITS1_5.8S_ITS2	CATTG	Eukaryota; Fungi; Dikarya; Ascomycota; Pezizomycotina; Sordariomycetes; Sordariomycetidae; Diaporthales; Diaporthaceae; Diaporthe	Diaporthe mayteni	1303585	KC343139	NR_111852	CBS:133185	CBS 133185			ex-type culture of Diaporthe mayteni
901		Diaporthe musigena	complete ITS1_5.8S_ITS2	CATTG	Eukaryota; Fungi; Dikarya; Ascomycota; Pezizomycotina; Sordariomycetes; Sordariomycetidae; Diaporthales; Diaporthaceae; Diaporthe	Diaporthe musigena	1050727	KC343143	NR_111853	CBS:129519	CBS 129519			ex-type culture of Diaporthe musigena
902		Diaporthe neoarctii	complete ITS1_5.8S_ITS2	CATTG	Eukaryota; Fungi; Dikarya; Ascomycota; Pezizomycotina; Sordariomycetes; Sordariomycetidae; Diaporthales; Diaporthaceae; Diaporthe	Diaporthe neoarctii	1303586	KC343145	NR_111854	CBS:109490	CBS 109490			ex-type culture of Diaporthe neoarctii
903		Diaporthe novem	complete ITS1_5.8S_ITS2	CATTG	Eukaryota; Fungi; Dikarya; Ascomycota; Pezizomycotina; Sordariomycetes; Sordariomycetidae; Diaporthales; Diaporthaceae; Diaporthe	Diaporthe novem	1035935	KC343156	NR_111855	CBS:127270	CBS 127270			ex-type culture of Diaporthe novem
904		Diaporthe oxe	complete ITS1_5.8S_ITS2	CATTG	Eukaryota; Fungi; Dikarya; Ascomycota; Pezizomycotina; Sordariomycetes; Sordariomycetidae; Diaporthales; Diaporthaceae; Diaporthe	Diaporthe oxe	1304157	KC343164	NR_111856	CBS:133186	CBS 133186			ex-type culture of Diaporthe oxe
905		Diaporthe paranensis	complete ITS1_5.8S_ITS2	CATTG	Eukaryota; Fungi; Dikarya; Ascomycota; Pezizomycotina; Sordariomycetes; Sordariomycetidae; Diaporthales; Diaporthaceae; Diaporthe	Diaporthe paranensis	1303593	KC343171	NR_111857	CBS:133184	CBS 133184			ex-type culture of Diaporthe paranensis
906		Diaporthe pseudomangiferae	complete ITS1_5.8S_ITS2	CATTG	Eukaryota; Fungi; Dikarya; Ascomycota; Pezizomycotina; Sordariomycetes; Sordariomycetidae; Diaporthales; Diaporthaceae; Diaporthe	Diaporthe pseudomangiferae	1303594	KC343181	NR_111858	CBS:101339	CBS 101339			ex-type culture of Diaporthe pseudomangiferae
907		Diaporthe pseudophoenicicola	complete ITS1_5.8S_ITS2	CATTG	Eukaryota; Fungi; Dikarya; Ascomycota; Pezizomycotina; Sordariomycetes; Sordariomycetidae; Diaporthales; Diaporthaceae; Diaporthe	Diaporthe pseudophoenicicola	1303595	KC343184	NR_111859	CBS:462.69	CBS 462.69			ex-type culture of Diaporthe pseudophoenicicola
908		Diaporthe raonikayaporum	complete ITS1_5.8S_ITS2	CATTG	Eukaryota; Fungi; Dikarya; Ascomycota; Pezizomycotina; Sordariomycetes; Sordariomycetidae; Diaporthales; Diaporthaceae; Diaporthe	Diaporthe raonikayaporum	1303596	KC343188	NR_111860	CBS:133182	CBS 133182			ex-type culture of Diaporthe raonikayaporum
909		Diaporthe saccarata	complete ITS1_5.8S_ITS2	CATTG	Eukaryota; Fungi; Dikarya; Ascomycota; Pezizomycotina; Sordariomycetes; Sordariomycetidae; Diaporthales; Diaporthaceae; Diaporthe	Diaporthe saccarata	1303611	KC343190		CBS:116311	CBS 116311			ex-type culture of Phomopsis saccarata
910		Diaporthe schini	complete ITS1_5.8S_ITS2	CATTG	Eukaryota; Fungi; Dikarya; Ascomycota; Pezizomycotina; Sordariomycetes; Sordariomycetidae; Diaporthales; Diaporthaceae; Diaporthe	Diaporthe schini	1303612	KC343191	NR_111861	CBS:133181	CBS 133181			ex-type culture of Diaporthe schini
911		Diaporthe terebinthifolii	complete ITS1_5.8S_ITS2	CATTG	Eukaryota; Fungi; Dikarya; Ascomycota; Pezizomycotina; Sordariomycetes; Sordariomycetidae; Diaporthales; Diaporthaceae; Diaporthe	Diaporthe terebinthifolii	1303642	KC343216	NR_111862	CBS:133180	CBS 133180			ex-type culture of Diaporthe terebinthifolii
912		Diaporthe toxica	complete ITS1_5.8S_ITS2	CATTG	Eukaryota; Fungi; Dikarya; Ascomycota; Pezizomycotina; Sordariomycetes; Sordariomycetidae; Diaporthales; Diaporthaceae; Diaporthe	Diaporthe toxica	1303514	KC343220		CBS:534.93	CBS 534.93			ex-type culture of Diaporthe toxica
913		Diaporthe vaccinii	complete ITS1_5.8S_ITS2	CATTG	Eukaryota; Fungi; Dikarya; Ascomycota; Pezizomycotina; Sordariomycetes; Sordariomycetidae; Diaporthales; Diaporthaceae; Diaporthe	Diaporthe vaccinii	105482	KC343228	NR_103701	CBS:160.32	CBS 160.32			ex-type culture of Diaporthe vaccinii
914		Lactifluus igniculus	complete ITS1_5.8S_ITS2	Yes	Eukaryota; Fungi; Dikarya; Basidiomycota; Agaricomycotina; Agaricomycetes; Russulales; Russulaceae; Lactifluus	Lactifluus igniculus	1315971	JX442759					LE<RUS>:262983	holotype of Lactifluus igniculus
915		Lactifluus chrysocarpus	complete ITS1_5.8S_ITS2	Yes	Eukaryota; Fungi; Dikarya; Basidiomycota; Agaricomycotina; Agaricomycetes; Russulales; Russulaceae; Lactifluus	Lactifluus chrysocarpus	1315970	JX442761					LE<RUS>:253907	holotype of Lactifluus chrysocarpus	2
916		Microbotryum silenes-saxifragae	complete ITS1_5.8S_ITS2		Eukaryota; Fungi; Dikarya; Basidiomycota; Pucciniomycotina; Microbotryomycetes; Microbotryales; Microbotryaceae; Microbotryum	Microbotryum silenes-saxifragae	1181469	JN000071					KR:M:23890	holotype of Microbotryum silenes-saxifragae
917		Microbotryum violaceum	complete ITS1_5.8S_ITS2	Yes	Eukaryota; Fungi; Dikarya; Basidiomycota; Pucciniomycotina; Microbotryomycetes; Microbotryales; Microbotryaceae; Microbotryum	Microbotryum violaceum	5272	DQ640065			ml1169		GLM:50283	neotype of Microbotryum violaceum
918		Microbotryum adenopetalae	complete ITS1_5.8S_ITS2	Yes	Eukaryota; Fungi; Dikarya; Basidiomycota; Pucciniomycotina; Microbotryomycetes; Microbotryales; Microbotryaceae; Microbotryum	Microbotryum adenopetalae	370303	DQ366848					KRAM:F:55201	holotype of Microbotryum adenopetalae
919		Antherospora hortensis	complete ITS1_5.8S_ITS2		Eukaryota; Fungi; Dikarya; Basidiomycota; Ustilaginomycotina; Ustilaginomycetes; Urocystales; Floromycetaceae; Antherospora	Antherospora hortensis	1319832	KC175337					KRAM:F:49437	holotype of Antherospora hortensis
920		Antherospora vindobonensis	complete ITS1_5.8S_ITS2		Eukaryota; Fungi; Dikarya; Basidiomycota; Ustilaginomycotina; Ustilaginomycetes; Urocystales; Floromycetaceae; Antherospora	Antherospora vindobonensis	747524	EF653989					SAV:TUB 15847	holotype of Antherospora vindobonensis
921		Leucoagaricus lateritiopurpureus	only 5.8S_ITS2 complete, ITS1 partial	Yes	Eukaryota; Fungi; Dikarya; Basidiomycota; Agaricomycotina; Agaricomycetes; Agaricomycetidae; Agaricales; Agaricaceae; Leucoagaricus	Leucoagaricus lateritiopurpureus	1215344	JX133173			LE289361		LE<RUS>:289361	epitype of Leucoagaricus lateritiopurpureus
922		Leucoagaricus proximus	only 5.8S_ITS2 complete, ITS1 partial	Yes	Eukaryota; Fungi; Dikarya; Basidiomycota; Agaricomycotina; Agaricomycetes; Agaricomycetidae; Agaricales; Agaricaceae; Leucoagaricus	Leucoagaricus proximus	1215345	JX133172			LE262861		LE<RUS>:262861	holotype of Leucoagaricus proximus
924		Leucoagaricus rubrobrunneus	only 5.8S_ITS2 complete, ITS1 partial	Yes	Eukaryota; Fungi; Dikarya; Basidiomycota; Agaricomycotina; Agaricomycetes; Agaricomycetidae; Agaricales; Agaricaceae; Leucoagaricus	Leucoagaricus rubrobrunneus	1215346	JX133168			LE262863		LE<RUS>:262863	holotype of Leucoagaricus rubrobrunneus
925	María P. Martín et al.	Brevicellicium atlanticum	only 5.8S_ITS2 complete, ITS1 partial	Yes	Eukaryota; Fungi; Dikarya; Basidiomycota; Agaricomycotina; Agaricomycetes; Trechisporales; 'Trechisporaceae'; Brevicellicium	Brevicellicium atlanticum	1211311	HE963773			E06/60-12		LISU:178566	holotype of Brevicellicium atlanticum
926	Pradeep K. Divakar	Melanelixia californica	only 5.8S complete, ITS1&2 partial	Yes	Eukaryota; Fungi; Dikarya; Ascomycota; Pezizomycotina; Lecanoromycetes; Lecanoromycetidae; Lecanorales; Lecanorineae; Parmeliaceae; Melanelixia	Melanelixia californica	1224323	EU761210					MAF:Lich:15559	holotype of Melanelixia californica
927	María P. Martín	Hypoderma minteri	only 5.8S_ITS2 complete, ITS1 partial		Eukaryota; Fungi; Dikarya; Ascomycota; Pezizomycotina; Leotiomycetes; Rhytismatales; Rhytismataceae; Hypoderma	Hypoderma minteri	1316214	JX232416			HOU275B		BJTC:201203	holotype of Hypoderma minterii
929	Huzefa Raja, Carol Shearer, Andrew Miller	Lindgomyces angustiascus	only 5.8S_ITS2 complete, ITS1 partial	Yes	Eukaryota; Fungi; Dikarya; Ascomycota; Pezizomycotina; Dothideomycetes; Pleosporomycetidae; Pleosporales; Lindgomycetaceae	Lindgomyces angustiascus	1249632	JX508281			A640-1a		ILL:41201	holotype of Lindgomyces angustiascus
930		Arthrinium rasikravindrii	only 5.8S_ITS2 complete, ITS1 partial	Yes	Eukaryota; Fungi; Dikarya; Ascomycota; Pezizomycotina; Sordariomycetes; Xylariomycetidae; Xylariales; Apiosporaceae; Arthrinium	Arthrinium rasikravindrii	990691	JF326454		NFCCI:2144	NFCCI 2144		AMH:9435	ex-holotype culture of Arthrinium rasikravindrii
931		Wickerhamomyces siamensis	only 5.8S_ITS2 complete, ITS1 partial	Yes	Eukaryota; Fungi; Dikarya; Ascomycota; Saccharomycotina; Saccharomycetes; Saccharomycetales; Phaffomycetaceae; Wickerhamomyces	Wickerhamomyces siamensis	1177568	AB714257	NR_111029	DMKU:RK359	DMKU RK359			ex-holotype culture of Wickerhamomyces siamensis
932		Auxarthron ostraviense	only 5.8S_ITS2 complete, ITS1 partial		Eukaryota; Fungi; Dikarya; Ascomycota; Pezizomycotina; Eurotiomycetes; Eurotiomycetidae; Onygenales; Onygenaceae; Auxarthron	Auxarthron ostraviense	1220168	HE974452		CCF<CZE>:4241	CCF 4241			ex-holotype culture of Auxarthron ostraviense
933		Auxarthron conjugatum	only 5.8S_ITS2 complete, ITS1 partial		Eukaryota; Fungi; Dikarya; Ascomycota; Pezizomycotina; Eurotiomycetes; Eurotiomycetidae; Onygenales; Onygenaceae; Auxarthron	Auxarthron conjugatum	113403	HF545313		CBS:247.58	CBS 247.58			ex-type culture of Myxotrichum conjugatum
934	S. Hambleton	Auxarthron thaxteri	complete ITS1_5.8S_ITS2	Yes	Eukaryota; Fungi; Dikarya; Ascomycota; Pezizomycotina; Eurotiomycetes; Eurotiomycetidae; Onygenales; Onygenaceae; Auxarthron	Auxarthron thaxteri	113400	AY177305	NR_111138	UAMH:3912	UAMH 3912			ex-type culture of Auxarthron thaxteri
935	S. Hambleton	Auxarthron umbrinum	complete ITS1_5.8S_ITS2	Yes	Eukaryota; Fungi; Dikarya; Ascomycota; Pezizomycotina; Eurotiomycetes; Eurotiomycetidae; Onygenales; Onygenaceae; Auxarthron	Auxarthron umbrinum	203537	AY177309	NR_111140	UAMH:3952	UAMH 3952			ex-type culture of Auxarthron umbrinum
936	S. Hambleton	Auxarthron zuffianum	complete ITS1_5.8S_ITS2	Yes	Eukaryota; Fungi; Dikarya; Ascomycota; Pezizomycotina; Eurotiomycetes; Eurotiomycetidae; Onygenales; Onygenaceae; Auxarthron	Auxarthron zuffianum	33186	AY177306	NR_111139	UAMH:1875	UAMH 1875			ex-neotype culture of Auxarthron zuffianum
937		Auxarthron compactum	only 5.8S_ITS2 complete, ITS1 partial	Yes	Eukaryota; Fungi; Dikarya; Ascomycota; Pezizomycotina; Eurotiomycetes; Eurotiomycetidae; Onygenales; Onygenaceae; Auxarthron	Auxarthron compactum	78592	AJ271574	NR_103574	CBS:200.64	CBS 200.64			ex-type culture of Auxarthron compactum
938	S. Hambleton	Auxarthron alboluteum	only 5.8S_ITS2 complete, ITS1 partial	Yes	Eukaryota; Fungi; Dikarya; Ascomycota; Pezizomycotina; Eurotiomycetes; Eurotiomycetidae; Onygenales; Onygenaceae; Auxarthron	Auxarthron alboluteum	33179	AY177303	NR_111137	UAMH:2846	UAMH 2846			ex-type culture of Auxarthron alboluteum
939		Auxarthron californiense	only 5.8S_ITS2 complete, ITS1 partial	Yes	Eukaryota; Fungi; Dikarya; Ascomycota; Pezizomycotina; Eurotiomycetes; Eurotiomycetidae; Onygenales; Onygenaceae; Auxarthron	Auxarthron californiense	73173	AF038352		UAMH:1889	UAMH 1889			ex-type culture of Auxarthron californiense
940		Auxarthron concentricum	only 5.8S_ITS2 complete, ITS1 partial	Yes	Eukaryota; Fungi; Dikarya; Ascomycota; Pezizomycotina; Eurotiomycetes; Eurotiomycetidae; Onygenales; Onygenaceae; Auxarthron	Auxarthron concentricum	113407	AJ271428	NR_111089	FMR:4054	FMR 4054			ex-type culture of Auxarthron concentricum
941		Auxarthron pseudauxarthron	only 5.8S_ITS2 complete, ITS1 partial	Yes	Eukaryota; Fungi; Dikarya; Ascomycota; Pezizomycotina; Eurotiomycetes; Eurotiomycetidae; Onygenales; Onygenaceae; Auxarthron	Auxarthron pseudauxarthron	113402	AJ271572	NR_111093	IFO:31701	IFO 31701			ex-type culture of Auxarthron pseudoauxarthron
942		Auxarthron kuehnii	only 5.8S_ITS2 complete, ITS1 partial	Yes	Eukaryota; Fungi; Dikarya; Ascomycota; Pezizomycotina; Eurotiomycetes; Eurotiomycetidae; Onygenales; Onygenaceae; Auxarthron	Auxarthron kuehnii	113406	AJ271417	NR_103573	CBS:539.72	CBS 539.72			ex-type culture of Amauroascus kuehnii
943		Auxarthron pseudoreticulatum	only 5.8S_ITS2 complete, ITS1 partial	Yes	Eukaryota; Fungi; Dikarya; Ascomycota; Pezizomycotina; Eurotiomycetes; Eurotiomycetidae; Onygenales; Onygenaceae; Auxarthron	Auxarthron pseudoreticulatum	113413	AJ426452	NR_111111	UAMH:3117	UAMH 3117			ex-type culture of Amauroascus pseudoreticulatus
944	S. Hambleton	Auxarthron filamentosum	only 5.8S_ITS2 complete, ITS1 partial	Yes	Eukaryota; Fungi; Dikarya; Ascomycota; Pezizomycotina; Eurotiomycetes; Eurotiomycetidae; Onygenales; Onygenaceae; Auxarthron	Auxarthron filamentosum	33181	AY177298	NR_111136	UAMH:4097	UAMH 4097			ex-type culture of Malbranchea filamentosa
945		Amauroascus aureus	only 5.8S_ITS2 complete, ITS1 partial	Yes	Eukaryota; Fungi; Dikarya; Ascomycota; Pezizomycotina; Eurotiomycetes; Eurotiomycetidae; Onygenales; Onygenaceae; Amauroascus	Amauroascus aureus	113411	AJ271433	NR_111091	IMI:151274	IMI 151274			ex-neotype culture of Gymnoascus aureus
946		Uncinocarpus reesii	only 5.8S_ITS2 complete, ITS1 partial		Eukaryota; Fungi; Dikarya; Ascomycota; Pezizomycotina; Eurotiomycetes; Eurotiomycetidae; Onygenales; Onygenaceae; Uncinocarpus	Uncinocarpus reesii	33188	AJ271566	NR_111092	CBS:121.77	CBS 121.77			ex-type culture of Uncinocarpus reesii
947		Shanorella spirotricha	only 5.8S_ITS2 complete, ITS1 partial		Eukaryota; Fungi; Dikarya; Ascomycota; Pezizomycotina; Eurotiomycetes; Eurotiomycetidae; Onygenales; Onygenaceae; Shanorella	Shanorella spirotricha	113410	AJ271430	NR_111090	CBS:305.56	CBS 305.56			ex-type culture of Shanorella spirotricha
948		Pectinotrichum llanense	only 5.8S complete, ITS1&2 partial		Eukaryota; Fungi; Dikarya; Ascomycota; Pezizomycotina; Eurotiomycetes; Eurotiomycetidae; Onygenales; Onygenaceae; Pectinotrichum	Pectinotrichum llanense	78604	AJ390391		RV<RUS>: 22834;CBS:882.71;IMI:155643;ATCC:18921;IHEM:4440				ex-type culture of Pectinotrichum llanense
950		Acrocalymma aquatica	only ITS1_5.8S complete, ITS2 partial		Eukaryota; Fungi; Dikarya; Ascomycota; Pezizomycotina; Dothideomycetes; Pleosporomycetidae; Pleosporales; Massarineae; Morosphaeriaceae; Acrocalymma	Acrocalymma aquatica	163258	JX276951		MFLUCC:11-0208	MFLUCC 11-0208			ex-holotype culture of Acrocalymma aquatica
951		Aquasubmersa mircensis	complete ITS1_5.8S_ITS2		Eukaryota; Fungi; Dikarya; Ascomycota; Pezizomycotina; Dothideomycetes; Pleosporomycetidae; Pleosporales; Pleosporales incertae sedis; Aquasubmersa	Aquasubmersa mircensis	1231660	JX276954		MFLUCC:11-0401	MFLUCC 11-0401			ex-holotype culture of Aquasubmersa mircensis
952	Cobus Visagie	Penicillium adametzii	only 5.8S_ITS2 complete, ITS1 partial	Yes	Eukaryota; Fungi; Dikarya; Ascomycota; Pezizomycotina; Eurotiomycetes; Eurotiomycetidae; Eurotiales; Aspergillaceae; Penicillium	Penicillium adametzii	69763	JN714929	NR_103661	CBS:209.28	CBS 209.28			ex-type culture of Penicillium adametzii
953	Cobus Visagie	Penicillium adametzioides	only 5.8S_ITS2 complete, ITS1 partial	Yes	Eukaryota; Fungi; Dikarya; Ascomycota; Pezizomycotina; Eurotiomycetes; Eurotiomycetidae; Eurotiales; Aspergillaceae; Penicillium	Penicillium adametzioides	70094	JN686433	NR_103660	CBS:313.59	CBS 313.59			ex-type culture of Penicillium adametzioides
954	Cobus Visagie	Penicillium alexiae	only 5.8S_ITS2 complete, ITS1 partial	Yes	Eukaryota; Fungi; Dikarya; Ascomycota; Pezizomycotina; Eurotiomycetes; Eurotiomycetidae; Eurotiales; Aspergillaceae; Penicillium	Penicillium alexiae	1324773	KC790400	NR_111869	CBS:134558	DTO 118H8			ex-type culture of Penicillium alexiae
955	Cobus Visagie	Penicillium amaliae	only 5.8S_ITS2 complete, ITS1 partial	Yes	Eukaryota; Fungi; Dikarya; Ascomycota; Pezizomycotina; Eurotiomycetes; Eurotiomycetidae; Eurotiales; Aspergillaceae; Penicillium	Penicillium amaliae	1324778	JX091443	NR_111767	CBS:134209	CV1875			ex-type culture of Penicillium amaliae
957	Cobus Visagie	Penicillium arianeae	only 5.8S_ITS2 complete, ITS1 partial	Yes	Eukaryota; Fungi; Dikarya; Ascomycota; Pezizomycotina; Eurotiomycetes; Eurotiomycetidae; Eurotiales; Aspergillaceae; Penicillium	Penicillium arianeae	1324774	KC773833		CBS:134559	DTO 20B8			ex-type culture of Penicillium arianae
958	Cobus Visagie	Penicillium bilaiae	only 5.8S_ITS2 complete, ITS1 partial	Yes	Eukaryota; Fungi; Dikarya; Ascomycota; Pezizomycotina; Eurotiomycetes; Eurotiomycetidae; Eurotiales; Aspergillaceae; Penicillium	Penicillium bilaiae	69765	JN714937	NR_111679	NRRL:3391	NRRL 3391			ex-type culture of Penicillium bilaiae
959		Penicillium brocae	only 5.8S complete, ITS1&2 partial		Eukaryota; Fungi; Dikarya; Ascomycota; Pezizomycotina; Eurotiomycetes; Eurotiomycetidae; Eurotiales; Aspergillaceae; Penicillium	Penicillium brocae	201291	KC773835	NR_111868	CBS:116113	NRRL 31472			ex-type culture of Penicillium brocae
960	Cobus Visagie	Penicillium cainii	only 5.8S complete, ITS1&2 partial	Yes	Eukaryota; Fungi; Dikarya; Ascomycota; Pezizomycotina; Eurotiomycetes; Eurotiomycetidae; Eurotiales; Aspergillaceae; Penicillium	Penicillium cainii	1096959	JN686435		DAOM:239914				ex-type culture of Penicillium cainii
961	Cobus Visagie	Penicillium guanacastense	only 5.8S_ITS2 complete, ITS1 partial	Yes	Eukaryota; Fungi; Dikarya; Ascomycota; Pezizomycotina; Eurotiomycetes; Eurotiomycetidae; Eurotiales; Aspergillaceae; Penicillium	Penicillium guanacastense	1134118	JN626098	NR_111673	DAOM:239912	DAOM 239912			ex-type culture of Penicillium guanacastense
962	Cobus Visagie	Penicillium herquei	only 5.8S_ITS2 complete, ITS1 partial	Yes	Eukaryota; Fungi; Dikarya; Ascomycota; Pezizomycotina; Eurotiomycetes; Eurotiomycetidae; Eurotiales; Aspergillaceae; Penicillium	Penicillium herquei	69774	JN626101	NR_103659	CBS:336.48	CBS 336.48			ex-type culture of Penicillium herquei
963	Cobus Visagie	Penicillium hirayamae	only 5.8S_ITS2 complete, ITS1 partial		Eukaryota; Fungi; Dikarya; Ascomycota; Pezizomycotina; Eurotiomycetes; Eurotiomycetidae; Eurotiales; Aspergillaceae; Penicillium	Penicillium hirayamae	91632	JN626095	NR_111672	CBS:229.60	CBS 229.60			ex-type culture of Penicillium hirayamae
964	Cobus Visagie	Penicillium jacksonii	only 5.8S_ITS2 complete, ITS1 partial	Yes	Eukaryota; Fungi; Dikarya; Ascomycota; Pezizomycotina; Eurotiomycetes; Eurotiomycetidae; Eurotiales; Aspergillaceae; Penicillium	Penicillium jacksonii	1096960	JN686437	NR_111675	DAOM:239937	DAOM 239937			ex-type culture of Penicillium jacksonii
965	Cobus Visagie	Penicillium johnkrugii	only 5.8S_ITS2 complete, ITS1 partial		Eukaryota; Fungi; Dikarya; Ascomycota; Pezizomycotina; Eurotiomycetes; Eurotiomycetidae; Eurotiales; Aspergillaceae; Penicillium	Penicillium johnkrugii	1096961	JN686447	NR_111676	DAOM:239943	DAOM 239943			ex-type culture of Penicillium johnkrugii
966		Penicillium jugoslavicum	only 5.8S_ITS2 complete, ITS1 partial	Yes	Eukaryota; Fungi; Dikarya; Ascomycota; Pezizomycotina; Eurotiomycetes; Eurotiomycetidae; Eurotiales; Aspergillaceae; Penicillium	Penicillium jugoslavicum	1167491	KC773836		CBS:192.87	CBS 192.87			ex-type culture of Penicillium jugoslavicum
967	Cobus Visagie	Penicillium levitum	only 5.8S_ITS2 complete, ITS1 partial	Yes	Eukaryota; Fungi; Dikarya; Ascomycota; Pezizomycotina; Eurotiomycetes; Eurotiomycetidae; Eurotiales; Aspergillaceae; Penicillium	Penicillium levitum	1134121	GU981607	NR_111510	CBS:345.48				ex-type culture of Penicillium levitum
968		Penicillium lilacinoechinulatum	only 5.8S_ITS2 complete, ITS1 partial	Yes	Eukaryota; Fungi; Dikarya; Ascomycota; Pezizomycotina; Eurotiomycetes; Eurotiomycetidae; Eurotiales; Aspergillaceae; Penicillium	Penicillium lilacinoechinulatum	451136	KC773837		CBS:454.93	CBS 454.93			ex-type culture of Penicillium citreonigrum
969	Cobus Visagie	Penicillium malachiteum	only 5.8S_ITS2 complete, ITS1 partial	Yes	Eukaryota; Fungi; Dikarya; Ascomycota; Pezizomycotina; Eurotiomycetes; Eurotiomycetidae; Eurotiales; Aspergillaceae; Penicillium	Penicillium malachiteum	1324776	KC773838		CBS:647.95	CBS 647.95			ex-type culture of Chromocleista malachitea
970	Cobus Visagie	Penicillium mallochii	only 5.8S_ITS2 complete, ITS1 partial	Yes	Eukaryota; Fungi; Dikarya; Ascomycota; Pezizomycotina; Eurotiomycetes; Eurotiomycetidae; Eurotiales; Aspergillaceae; Penicillium	Penicillium mallochii	1134119	JN626104	NR_111674	DAOM:239917	DAOM 239917			ex-type culture of Penicillium mallochii
971	Cobus Visagie	Penicillium maximae	only 5.8S_ITS2 complete, ITS1 partial		Eukaryota; Fungi; Dikarya; Ascomycota; Pezizomycotina; Eurotiomycetes; Eurotiomycetidae; Eurotiales; Aspergillaceae; Penicillium	Penicillium maximae	1324777	EU427298		NRRL:2060				ex-type culture of Penicillium maximae
972	Cobus Visagie	Penicillium multicolor	only 5.8S_ITS2 complete, ITS1 partial	Yes	Eukaryota; Fungi; Dikarya; Ascomycota; Pezizomycotina; Eurotiomycetes; Eurotiomycetidae; Eurotiales; Aspergillaceae; Penicillium	Penicillium multicolor	266794	KC790402	NR_111870	CBS:501.73	CBS 501.73			ex-type culture of Penicillium multicolor
973	Cobus Visagie	Penicillium vanoranjei	complete ITS1_5.8S_ITS2	Yes	Eukaryota; Fungi; Dikarya; Ascomycota; Pezizomycotina; Eurotiomycetes; Eurotiomycetidae; Eurotiales; Aspergillaceae; Penicillium	Penicillium vanoranjei	1324772	KC695696		CBS:134406	DTO 99H6			ex-type culture of Penicillium vanoranjei
974		Octaviania nonae	complete ITS1_5.8S_ITS2	Yes	Eukaryota; Fungi; Dikarya; Basidiomycota; Agaricomycotina; Agaricomycetes; Agaricomycetidae; Boletales; Boletineae; Boletaceae; Octaviania; Parcea	Octaviania nonae	1072254	JN257986					KPM:NC-0017749	holotype of Octaviania nonae	1
975		Octaviania decimae	complete ITS1_5.8S_ITS2		Eukaryota; Fungi; Dikarya; Basidiomycota; Agaricomycotina; Agaricomycetes; Agaricomycetidae; Boletales; Boletineae; Boletaceae; Octaviania; Parcea	Octaviania decimae	1072247	JN257991					KPM:NC-0017763	holotype of Octaviania decimae
976		Octaviania celatifilia	complete ITS1_5.8S_ITS2		Eukaryota; Fungi; Dikarya; Basidiomycota; Agaricomycotina; Agaricomycetes; Agaricomycetidae; Boletales; Boletineae; Boletaceae; Octaviania; Parcea	Octaviania celatifilia	1072246	JN257997					KPM:NC-0017776	holotype of Octaviania celatifilia	1
977		Octaviania hesperi	only ITS1_5.8S complete, ITS2 partial	Yes	Eukaryota; Fungi; Dikarya; Basidiomycota; Agaricomycotina; Agaricomycetes; Agaricomycetidae; Boletales; Boletineae; Boletaceae; Octaviania; Fulvoglobus	Octaviania hesperi	1072250	JQ619173					KPM:NC-0017793	holotype of Octaviania hesperi
978		Octaviania durianelloides	only ITS1_5.8S complete, ITS2 partial		Eukaryota; Fungi; Dikarya; Basidiomycota; Agaricomycotina; Agaricomycetes; Agaricomycetidae; Boletales; Boletineae; Boletaceae; Octaviania; Fulvoglobus	Octaviania durianelloides	1072248	JQ619177					KPM:NC-0017829	holotype of Octaviania durianelloides
979		Octaviania yaeyamaensis	only 5.8S complete, ITS1&2 partial	Yes	Eukaryota; Fungi; Dikarya; Basidiomycota; Agaricomycotina; Agaricomycetes; Agaricomycetidae; Boletales; Boletineae; Boletaceae; Octaviania; Fulvoglobus	Octaviania yaeyamaensis	1072255	JQ619180					KPM:NC-0017819	holotype of Octaviania yaeyamaensis
980		Octaviania etchuensis	complete ITS1_5.8S_ITS2	Yes	Eukaryota; Fungi; Dikarya; Basidiomycota; Agaricomycotina; Agaricomycetes; Agaricomycetidae; Boletales; Boletineae; Boletaceae; Octaviania; Fulvoglobus	Octaviania etchuensis	1072249	JQ619182					KPM:NC-0017822	holotype of Octaviania etchuensis
981	Zhu L. Yang, Qing Cai	Amanita altipes	only 5.8S complete, ITS1&2 partial		Eukaryota; Fungi; Dikarya; Basidiomycota; Agaricomycotina; Agaricomycetes; Agaricomycetidae; Agaricales; Amanitaceae; Amanita	Amanita altipes	262234	AY436445					HKAS:36609	holotype of Amanita altipes
982		Amanita concentrica	complete ITS1_5.8S_ITS2		Eukaryota; Fungi; Dikarya; Basidiomycota; Agaricomycotina; Agaricomycetes; Agaricomycetidae; Agaricales; Amanitaceae; Amanita	Amanita concentrica	188874	AB080783					CBM:FB-24901	holotype of Amanita concentrica
983	Zhu L. Yang, Qing Cai	Amanita fuligineoides	complete ITS1_5.8S_ITS2	Yes	Eukaryota; Fungi; Dikarya; Basidiomycota; Agaricomycotina; Agaricomycetes; Agaricomycetidae; Agaricales; Amanitaceae; Amanita	Amanita fuligineoides	580329	FJ176721					HKAS:52316	holotype of Amanita fuligineoides
984	Zhu L. Yang, Qing Cai	Amanita griseofolia	only 5.8S complete, ITS1&2 partial		Eukaryota; Fungi; Dikarya; Basidiomycota; Agaricomycotina; Agaricomycetes; Agaricomycetidae; Agaricales; Amanitaceae; Amanita	Amanita griseofolia	576577	AY436448					HKAS:38159	holotype of Amanita griseofolia
985		Amanita griseoturcosa	complete ITS1_5.8S_ITS2		Eukaryota; Fungi; Dikarya; Basidiomycota; Agaricomycotina; Agaricomycetes; Agaricomycetidae; Agaricales; Amanitaceae; Amanita	Amanita griseoturcosa	267473	AB167728					CBM:FB-30253	holotype of Amanita griseoturcosa
986		Amanita ibotengutake	complete ITS1_5.8S_ITS2		Eukaryota; Fungi; Dikarya; Basidiomycota; Agaricomycotina; Agaricomycetes; Agaricomycetidae; Agaricales; Amanitaceae; Amanita	Amanita ibotengutake	188935	AB080988					CBM:FB-30969	holotype of Amanita ibotengutake
987	Zhu L. Yang, Qing Cai	Amanita liquii	only 5.8S complete, ITS1&2 partial		Eukaryota; Fungi; Dikarya; Basidiomycota; Agaricomycotina; Agaricomycetes; Agaricomycetidae; Agaricales; Amanitaceae; Amanita	Amanita liquii	262247	AY436462					HKAS:36611	holotype of Amanita liquii
989	Zhu L. Yang, Qing Cai	Amanita pallidorosea	complete ITS1_5.8S_ITS2	Yes	Eukaryota; Fungi; Dikarya; Basidiomycota; Agaricomycotina; Agaricomycetes; Agaricomycetidae; Agaricales; Amanitaceae; Amanita	Amanita pallidorosea	1324310	FJ176736					HKAS:54164	holotype of Amanita pallidorosea
990	Zhu L. Yang, Qing Cai	Amanita rimosa	complete ITS1_5.8S_ITS2	Yes	Eukaryota; Fungi; Dikarya; Basidiomycota; Agaricomycotina; Agaricomycetes; Agaricomycetidae; Agaricales; Amanitaceae; Amanita	Amanita rimosa	580330	FJ176728					HKAS:49675	holotype of Amanita rimosa
991	Zhu L. Yang, Qing Cai	Amanita sinensis	complete ITS1_5.8S_ITS2		Eukaryota; Fungi; Dikarya; Basidiomycota; Agaricomycotina; Agaricomycetes; Agaricomycetidae; Agaricales; Amanitaceae; Amanita	Amanita sinensis	67728	AB096059					HKAS:25761	holotype of Amanita sinensis
992		Amanita vernicoccora	only 5.8S_ITS2 complete, ITS1 partial	Yes	Eukaryota; Fungi; Dikarya; Basidiomycota; Agaricomycotina; Agaricomycetes; Agaricomycetidae; Agaricales; Amanitaceae; Amanita	Amanita vernicoccora	1055356	JN133297			DBB43538		UC<USA-CA>:1860906	holotype of Amanita vernicoccora	1
993		Fusarium pseudensiforme	only 5.8S complete, ITS1&2 partial		Eukaryota; Fungi; Dikarya; Ascomycota; Pezizomycotina; Sordariomycetes; Hypocreomycetidae; Hypocreales; Nectriaceae; mitosporic Nectriaceae; Fusarium; Fusarium solani species complex	Fusarium pseudensiforme	986114	JF433037		CBS:125729;FRC<USA-PA>:S-1834	S1834_GJS0295		BPI:881226	ex-holotype culture of Fusarium pseudensiforme
994		Fusarium kurunegalense	only 5.8S complete, ITS1&2 partial		Eukaryota; Fungi; Dikarya; Ascomycota; Pezizomycotina; Sordariomycetes; Hypocreomycetidae; Hypocreales; Nectriaceae; mitosporic Nectriaceae; Fusarium; Fusarium solani species complex	Fusarium kurunegalense	984958	JF433036		CBS:119599;FRC<USA-PA>:S-1833	S1833_GJS0294		BPI:881225	ex-holotype culture of Fusarium kurunegalense
995		Fusarium rectiphorum	only 5.8S complete, ITS1&2 partial		Eukaryota; Fungi; Dikarya; Ascomycota; Pezizomycotina; Sordariomycetes; Hypocreomycetidae; Hypocreales; Nectriaceae; mitosporic Nectriaceae; Fusarium; Fusarium solani species complex	Fusarium rectiphorum	984956	JF433034		CBS:125727;FRC<USA-PA>:S-1831	S1831_GJS0289		BPI:881229	ex-holotype culture of Fusarium rectiphorus
996		Fusarium mahasenii	only 5.8S complete, ITS1&2 partial		Eukaryota; Fungi; Dikarya; Ascomycota; Pezizomycotina; Sordariomycetes; Hypocreomycetidae; Hypocreales; Nectriaceae; mitosporic Nectriaceae; Fusarium; Fusarium solani species complex	Fusarium mahasenii	986113	JF433045		CBS:119594;FRC<USA-PA>:S-1845	S1845_GJS02105		BPI:881228	ex-holotype culture of Fusarium mahasenii
997		Fusarium kelerajum	only 5.8S complete, ITS1&2 partial		Eukaryota; Fungi; Dikarya; Ascomycota; Pezizomycotina; Sordariomycetes; Hypocreomycetidae; Hypocreales; Nectriaceae; mitosporic Nectriaceae; Fusarium; Fusarium solani species complex	Fusarium kelerajum	984959	JF433041		FRC<USA-PA>:S-1839			BPI:881124	ex-holotype culture of Fusarium kelerajum
998		Fusarium haematococcum	only 5.8S complete, ITS1&2 partial		Eukaryota; Fungi; Dikarya; Ascomycota; Pezizomycotina; Sordariomycetes; Hypocreomycetidae; Hypocreales; Nectriaceae; mitosporic Nectriaceae; Fusarium; Fusarium solani species complex	Fusarium haematococcum	984957	JF433035		CBS:119600;FRC<USA-PA>:S-1832	S1832_GJS0290		BPI:881227	ex-holotype culture of Fusarium haematococcum
999		Entoloma furfuraceum	complete ITS1_5.8S_ITS2		Eukaryota; Fungi; Dikarya; Basidiomycota; Agaricomycotina; Agaricomycetes; Agaricomycetidae; Agaricales; Entolomataceae; Entoloma	Entoloma furfuraceum	1249072	JX975293					GDGM:28818	holotype of Entoloma furfuraceum
1000		Entoloma subaraneosum	complete ITS1_5.8S_ITS2		Eukaryota; Fungi; Dikarya; Basidiomycota; Agaricomycotina; Agaricomycetes; Agaricomycetidae; Agaricales; Entolomataceae; Entoloma	Entoloma subaraneosum	1296617	JQ320113					GDGM:28823	holotype of Entoloma subaraneosum
1001		Entoloma tenuissimum	only 5.8S complete, ITS1&2 partial	Yes	Eukaryota; Fungi; Dikarya; Basidiomycota; Agaricomycotina; Agaricomycetes; Agaricomycetidae; Agaricales; Entolomataceae; Entoloma	Entoloma tenuissimum	1249075	JX975294					GDGM:28814	holotype of Entoloma tenuissimum
1002		Porodaedalea cedrina	only 5.8S_ITS2 complete, ITS1 partial		Eukaryota; Fungi; Dikarya; Basidiomycota; Agaricomycotina; Agaricomycetes; Hymenochaetales; Hymenochaetaceae; Porodaedalea	Porodaedalea cedrina	1197289	FJ775550					PRM:876397	holotype of Porodaedalea cedrina
1003	Conrad Schoch	Auricularia nigricans	only 5.8S_ITS2 complete, ITS1 partial	Yes	Eukaryota; Fungi; Dikarya; Basidiomycota; Agaricomycotina; Agaricomycetes; Auriculariales; Auriculariaceae; Auricularia	Auricularia nigricans	1331584	JX065172			TFB4405		TENN:056825	verified
1004		Auricularia scissa	complete ITS1_5.8S_ITS2		Eukaryota; Fungi; Dikarya; Basidiomycota; Agaricomycotina; Agaricomycetes; Auriculariales; Auriculariaceae; Auricularia	Auricularia scissa	1331294	JX065175			F64		FH:00301771	holotype of Auricularia scissa	3
1005		Auricularia subglabra	only ITS1_5.8S complete, ITS2 partial	Yes	Eukaryota; Fungi; Dikarya; Basidiomycota; Agaricomycotina; Agaricomycetes; Auriculariales; Auriculariaceae; Auricularia	Auricularia subglabra	1331295	JX065161			TFB10405		TENN:058100	holotype of Auricularia subglabra	1
1009	Tuula Niskanen	Cortinarius cinnabarinus	complete ITS1_5.8S_ITS2		Eukaryota; Fungi; Dikarya; Basidiomycota; Agaricomycotina; Agaricomycetes; Agaricomycetidae; Agaricales; Cortinariaceae; Cortinarius	Cortinarius cinnabarinus	304808	JX114944					S:F248436	epitype of Cortinarius cinnabarinus
1011	Kare Liimatainen	Cortinarius boulderensis	complete ITS1_5.8S_ITS2		Eukaryota; Fungi; Dikarya; Basidiomycota; Agaricomycotina; Agaricomycetes; Agaricomycetidae; Agaricales; Cortinariaceae; Cortinarius	Cortinarius boulderensis	386121	DQ499466			AHS17461		MICH:10323	holotype of Cortinarius boulderensis
1012		Calocera arborea	complete ITS1_5.8S_ITS2	Yes	Eukaryota; Fungi; Dikarya; Basidiomycota; Agaricomycotina; Dacrymycetes; Dacrymycetales; Dacrymycetaceae; Calocera	Calocera arborea	1194193	AB744230					INPA:241458	holotype of Calocera arborea
1014	Cathie Aime	Kwoniella botswanensis	only 5.8S complete, ITS1&2 partial		Eukaryota; Fungi; Dikarya; Basidiomycota; Agaricomycotina; Tremellomycetes; Tremellales; Tremellales incertae sedis; Kwoniella	Kwoniella botswanensis	1268659	HF545756		CBS:12716;PYCC:6332	K10;CBS 12716;PYCC 6332;DS 258			ex-type culture of Kwoniella botswanensis
1016		Cryptococcus amylolentus	complete ITS1_5.8S_ITS2	CAGTA	Eukaryota; Fungi; Dikarya; Basidiomycota; Agaricomycotina; Tremellomycetes; Tremellales; Tremellaceae; Filobasidiella	Cryptococcus amylolentus	104669	FJ534872	NR_111372	CBS:6039	CBS 6039			ex-type culture of Candida amylolenta
1017		Cryptococcus bestiolae	complete ITS1_5.8S_ITS2	Yes	Eukaryota; Fungi; Dikarya; Basidiomycota; Agaricomycotina; Tremellomycetes; Tremellales; mitosporic Tremellales; Cryptococcus	Cryptococcus bestiolae	324769	FJ534873	NR_111373	CBS:10118	CBS 10118			ex-type culture of Cryptococcus bestiolae
1018		Cryptococcus dejecticola	complete ITS1_5.8S_ITS2	Yes	Eukaryota; Fungi; Dikarya; Basidiomycota; Agaricomycotina; Tremellomycetes; Tremellales; mitosporic Tremellales; Cryptococcus	Cryptococcus dejecticola	324770	FJ534874	NR_111374	CBS:10117	CBS 10117			ex-type culture of Cryptococcus dejecticola
1019		Cryptococcus pinus	complete ITS1_5.8S_ITS2		Eukaryota; Fungi; Dikarya; Basidiomycota; Agaricomycotina; Tremellomycetes; Tremellales; mitosporic Tremellales; Cryptococcus	Cryptococcus pinus	453459	EF672246	NR_111269	VKM:Y-2958	VKM Y-2958			ex-type culture of Cryptococcus pinus
1020		Cryptococcus shivajii	only 5.8S complete, ITS1&2 partial		Eukaryota; Fungi; Dikarya; Basidiomycota; Agaricomycotina; Tremellomycetes; Tremellales; mitosporic Tremellales; Cryptococcus	Cryptococcus shivajii	564305	FM212571		CBS:11374;NCYC:3541	Bio10			ex-type culture of Cryptococcus shivajii
1023		Tsuchiyaea wingfieldii	complete ITS1_5.8S_ITS2	CAGTA	Eukaryota; Fungi; Dikarya; Basidiomycota; Agaricomycotina; Tremellomycetes; Tremellales; mitosporic Tremellales; Tsuchiyaea	Tsuchiyaea wingfieldii	5619	FJ534886	NR_111375	CBS:7118	CBS 7118			ex-type culture of Sterigmatomyces wingfieldii
1024	Ewald Groenewald	Pseudocercospora humuli	complete ITS1_5.8S_ITS2	Yes	Eukaryota; Fungi; Dikarya; Ascomycota; Pezizomycotina; Dothideomycetes; Dothideomycetidae; Capnodiales; Mycosphaerellaceae; Pseudocercospora	Pseudocercospora humuli	438363	GU269725	NR_111465	MUCC:742	MUCC 742			ex-epitype culture of Pseudocercospora humuli
1025	Ewald Groenewald	Colletotrichum verruculosum	only 5.8S_ITS2 complete, ITS1 partial	Yes	Eukaryota; Fungi; Dikarya; Ascomycota; Pezizomycotina; Sordariomycetes; Hypocreomycetidae; Glomerellales; Glomerellaceae; mitosporic Glomerellaceae; Colletotrichum	Colletotrichum verruculosum	708198	GU227806	NR_111450	IMI:45525				ex-holotype culture of Colletotrichum verruculosum
1026	Ewald Groenewald	Colletotrichum horii	complete ITS1_5.8S_ITS2		Eukaryota; Fungi; Dikarya; Ascomycota; Pezizomycotina; Sordariomycetes; Hypocreomycetidae; Glomerellales; Glomerellaceae; mitosporic Glomerellaceae; Colletotrichum	Colletotrichum horii	717645	GQ329690		ICMP:10492	C1180.1		PDD:98210	ex-neotype culture of Colletotrichum horii
1027	Ewald Groenewald	Pseudocercospora corylopsidis	complete ITS1_5.8S_ITS2	Yes	Eukaryota; Fungi; Dikarya; Ascomycota; Pezizomycotina; Dothideomycetes; Dothideomycetidae; Capnodiales; Mycosphaerellaceae; Pseudocercospora	Pseudocercospora corylopsidis	858777	GU269684	NR_111463	MUCC:908	MUCC 908			ex-epitype culture of Pseudocercospora corylopsidis
1028	Ewald Groenewald	Pseudocercospora fukuokaensis	complete ITS1_5.8S_ITS2	Yes	Eukaryota; Fungi; Dikarya; Ascomycota; Pezizomycotina; Dothideomycetes; Dothideomycetidae; Capnodiales; Mycosphaerellaceae; Pseudocercospora	Pseudocercospora fukuokaensis	858792	GU269714	NR_111464	MUCC:887	MUCC 887			ex-epitype culture of Pseudocercospora fukuokaensis
1029	Ewald Groenewald	Pseudocercospora lonicericola	complete ITS1_5.8S_ITS2	Yes	Eukaryota; Fungi; Dikarya; Ascomycota; Pezizomycotina; Dothideomycetes; Dothideomycetidae; Capnodiales; Mycosphaerellaceae; Pseudocercospora	Pseudocercospora lonicericola	858801	GU269736	NR_111466	MUCC:889	MUCC 889			ex-neotype culture of Pseudocercospora lonicericola
1030	Ewald Groenewald	Pseudocercospora lyoniae	complete ITS1_5.8S_ITS2	Yes	Eukaryota; Fungi; Dikarya; Ascomycota; Pezizomycotina; Dothideomycetes; Dothideomycetidae; Capnodiales; Mycosphaerellaceae; Pseudocercospora	Pseudocercospora lyoniae	858802	GU269739	NR_111467	MUCC:910	MUCC 910			ex-epitype culture of Pseudocercospora lyoniae
1031	Ewald Groenewald	Pseudocercospora stephanandrae	complete ITS1_5.8S_ITS2	Yes	Eukaryota; Fungi; Dikarya; Ascomycota; Pezizomycotina; Dothideomycetes; Dothideomycetidae; Capnodiales; Mycosphaerellaceae; Pseudocercospora	Pseudocercospora stephanandrae	858820	GU269814	NR_111469	MUCC:914	MUCC 914			ex-epitype culture of Pseudocercospora stephanandrae
1032	Ewald Groenewald	Colletotrichum cymbidiicola	only 5.8S_ITS2 complete, ITS1 partial	Yes	Eukaryota; Fungi; Dikarya; Ascomycota; Pezizomycotina; Sordariomycetes; Hypocreomycetidae; Glomerellales; Glomerellaceae; mitosporic Glomerellaceae; Colletotrichum	Colletotrichum cymbidiicola	1206803	JQ005166	NR_111694	IMI:347923				ex-holotype culture of Colletotrichum cymbidiicola
1033	Ewald Groenewald	Colletotrichum kahawae subsp. ciggaro	complete ITS1_5.8S_ITS2		Eukaryota; Fungi; Dikarya; Ascomycota; Pezizomycotina; Sordariomycetes; Hypocreomycetidae; Glomerellales; Glomerellaceae; mitosporic Glomerellaceae; Colletotrichum	Colletotrichum kahawae subsp. ciggaro	1215730	JX010230		ICMP:18539	UWS124		PDD:102232	ex-holotype culture of Colletotrichum kahawae subsp. ciggaro
1034	Ewald Groenewald	Colletotrichum aenigma	complete ITS1_5.8S_ITS2		Eukaryota; Fungi; Dikarya; Ascomycota; Pezizomycotina; Sordariomycetes; Hypocreomycetidae; Glomerellales; Glomerellaceae; mitosporic Glomerellaceae; Colletotrichum	Colletotrichum aenigma	1215731	JX010244		ICMP:18608	C1253.4		PDD:102233	ex-holotype culture of Colletotrichum aenigma
1035	Ewald Groenewald	Colletotrichum aotearoa	complete ITS1_5.8S_ITS2		Eukaryota; Fungi; Dikarya; Ascomycota; Pezizomycotina; Sordariomycetes; Hypocreomycetidae; Glomerellales; Glomerellaceae; mitosporic Glomerellaceae; Colletotrichum	Colletotrichum aotearoa	1215732	JX010205		ICMP:18537	C1282.4		PDD:101076	ex-holotype culture of Colletotrichum aotearoa
1036	Ewald Groenewald	Colletotrichum alienum	complete ITS1_5.8S_ITS2		Eukaryota; Fungi; Dikarya; Ascomycota; Pezizomycotina; Sordariomycetes; Hypocreomycetidae; Glomerellales; Glomerellaceae; mitosporic Glomerellaceae; Colletotrichum	Colletotrichum alienum	1215734	JX010251		ICMP:12071	C824		PDD:101996	ex-holotype culture of Colletotrichum alienum
1037	Ewald Groenewald	Colletotrichum clidemiae	complete ITS1_5.8S_ITS2		Eukaryota; Fungi; Dikarya; Ascomycota; Pezizomycotina; Sordariomycetes; Hypocreomycetidae; Glomerellales; Glomerellaceae; mitosporic Glomerellaceae; Colletotrichum	Colletotrichum clidemiae	1215736	JX010265		ICMP:18658	C1317.1		PDD:101997	ex-holotype culture of Colletotrichum clidemiae
1038	Ewald Groenewald	Colletotrichum aeschynomenes	complete ITS1_5.8S_ITS2		Eukaryota; Fungi; Dikarya; Ascomycota; Pezizomycotina; Sordariomycetes; Hypocreomycetidae; Glomerellales; Glomerellaceae; mitosporic Glomerellaceae; Colletotrichum	Colletotrichum aeschynomenes	1215737	JX010176		ICMP:17673	3-1-3		PDD:101995	ex-holotype culture of Colletotrichum aeschynomenes
1039	Ewald Groenewald	Colletotrichum ti	complete ITS1_5.8S_ITS2		Eukaryota; Fungi; Dikarya; Ascomycota; Pezizomycotina; Sordariomycetes; Hypocreomycetidae; Glomerellales; Glomerellaceae; mitosporic Glomerellaceae; Colletotrichum	Colletotrichum ti	1215738	JX010269		ICMP:4832	ICMP4832		PDD:24881	ex-holotype culture of Colletotrichum ti
1040	Ewald Groenewald	Colletotrichum salsolae	complete ITS1_5.8S_ITS2		Eukaryota; Fungi; Dikarya; Ascomycota; Pezizomycotina; Sordariomycetes; Hypocreomycetidae; Glomerellales; Glomerellaceae; mitosporic Glomerellaceae; Colletotrichum	Colletotrichum salsolae	1217143	JX010242		ICMP:19051	C1314			ex-holotype culture of Colletotrichum salsolae
1041	Ewald Groenewald	Cercospora alchemillicola	only 5.8S_ITS2 complete, ITS1 partial	Yes	Eukaryota; Fungi; Dikarya; Ascomycota; Pezizomycotina; Dothideomycetes; Dothideomycetidae; Capnodiales; Mycosphaerellaceae; Cercospora	Cercospora alchemillicola	1238160	JX143525	NR_111769	CPC:5259	CPC 5259			ex-epitype culture of Cercospora alchemillicola
1042	Ewald Groenewald	Cercospora corchori	complete ITS1_5.8S_ITS2		Eukaryota; Fungi; Dikarya; Ascomycota; Pezizomycotina; Dothideomycetes; Dothideomycetidae; Capnodiales; Mycosphaerellaceae; Cercospora	Cercospora corchori	1238178	JX143584		MUCC<JPN>:585	MUCC 585			ex-epitype culture of Cercospora corchori
1043	Ewald Groenewald	Colletotrichum brassicicola	only 5.8S_ITS2 complete, ITS1 partial	Yes	Eukaryota; Fungi; Dikarya; Ascomycota; Pezizomycotina; Sordariomycetes; Hypocreomycetidae; Glomerellales; Glomerellaceae; mitosporic Glomerellaceae; Colletotrichum	Colletotrichum brassicicola	1206800	JQ005172	NR_111696	CBS:101059	CBS 101059			ex-holotype culture of Colletotrichum brassicicola
1045	Ewald Groenewald	Colletotrichum lilii	only 5.8S_ITS2 complete, ITS1 partial	Yes	Eukaryota; Fungi; Dikarya; Ascomycota; Pezizomycotina; Sordariomycetes; Hypocreomycetidae; Glomerellales; Glomerellaceae; mitosporic Glomerellaceae; Colletotrichum	Colletotrichum lilii	708190	GU227810		CBS:109214	CBS 109214			verified
1046	Ewald Groenewald	Pseudocercospora eucalyptorum	complete ITS1_5.8S_ITS2	Yes	Eukaryota; Fungi; Dikarya; Ascomycota; Pezizomycotina; Dothideomycetes; Dothideomycetidae; Capnodiales; Mycosphaerellaceae; Pseudocercospora	Pseudocercospora eucalyptorum	161671	AF309598	NR_111057	CBS:110777	CPC 16			ex-epitype culture of Pseudocercospora eucalyptorum
1047	Ewald Groenewald	Pseudocercospora rhabdothamni	complete ITS1_5.8S_ITS2		Eukaryota; Fungi; Dikarya; Ascomycota; Pezizomycotina; Dothideomycetes; Dothideomycetidae; Capnodiales; Mycosphaerellaceae; Pseudocercospora	Pseudocercospora rhabdothamni	859479	GU269768	NR_111468	CBS:114872	CBS 114872			ex-holotype culture of Pseudocercospora rhabdothamni
1048	Ewald Groenewald	Cercospora apii	only 5.8S_ITS2 complete, ITS1 partial	Yes	Eukaryota; Fungi; Dikarya; Ascomycota; Pezizomycotina; Dothideomycetes; Dothideomycetidae; Capnodiales; Mycosphaerellaceae; Cercospora	Cercospora apii	132184	AY840519		CBS:116455;CPC:11556	CBS 116455;CPC 11556			ex-type culture of Cercospora apii
1049	Ewald Groenewald	Cercospora beticola	complete ITS1_5.8S_ITS2	Yes	Eukaryota; Fungi; Dikarya; Ascomycota; Pezizomycotina; Dothideomycetes; Dothideomycetidae; Capnodiales; Mycosphaerellaceae; Cercospora	Cercospora beticola	122368	AY840527		CBS:116456	CPC 11557			ex-epitype culture of Cercospora beticola
1050	Ewald Groenewald	Cercospora apiicola	only 5.8S_ITS2 complete, ITS1 partial	Yes	Eukaryota; Fungi; Dikarya; Ascomycota; Pezizomycotina; Dothideomycetes; Dothideomycetidae; Capnodiales; Mycosphaerellaceae; Cercospora	Cercospora apiicola	319634	AY840536		CBS:116457;CPC:10267	CBS 116457;CPC 10267			ex-type culture of Cercospora apiicola
1052	Ewald Groenewald	Cercospora agavicola	complete ITS1_5.8S_ITS2	Yes	Eukaryota; Fungi; Dikarya; Ascomycota; Pezizomycotina; Dothideomycetes; Dothideomycetidae; Capnodiales; Mycosphaerellaceae; Cercospora	Cercospora agavicola	284008	AY647237	NR_111175	CBS:117292	HCe001			ex-type culture of Cercospora agavicola
1053	Ewald Groenewald	Cercospora zeae-maydis	only 5.8S_ITS2 complete, ITS1 partial	Yes	Eukaryota; Fungi; Dikarya; Ascomycota; Pezizomycotina; Dothideomycetes; Dothideomycetidae; Capnodiales; Mycosphaerellaceae; Cercospora	Cercospora zeae-maydis	135779	DQ185074	NR_111204	CBS:117757	CBS 117757;A360			ex-epitype culture of Cercospora zeae-maydis
1054	Ewald Groenewald	Cercospora zeina	only 5.8S_ITS2 complete, ITS1 partial	Yes	Eukaryota; Fungi; Dikarya; Ascomycota; Pezizomycotina; Dothideomycetes; Dothideomycetidae; Capnodiales; Mycosphaerellaceae; Cercospora	Cercospora zeina	348901	DQ185081	NR_111205	CBS:118820	CPC 11995			ex-type culture of Cercospora zeina
1055	Ewald Groenewald	Colletotrichum rusci	only 5.8S_ITS2 complete, ITS1 partial	Yes	Eukaryota; Fungi; Dikarya; Ascomycota; Pezizomycotina; Sordariomycetes; Hypocreomycetidae; Glomerellales; Glomerellaceae; mitosporic Glomerellaceae; Colletotrichum	Colletotrichum rusci	708194	GU227818	NR_111452	CBS:119206	CBS 119206			ex-holotype culture of Colletotrichum rusci
1056	Ewald Groenewald	Colletotrichum liriopes	only 5.8S_ITS2 complete, ITS1 partial	Yes	Eukaryota; Fungi; Dikarya; Ascomycota; Pezizomycotina; Sordariomycetes; Hypocreomycetidae; Glomerellales; Glomerellaceae; mitosporic Glomerellaceae; Colletotrichum	Colletotrichum liriopes	708192	GU227804	NR_111449	CBS:119444	CBS 119444			ex-holotype culture of Colletotrichum liriopes
1057	Ewald Groenewald	Dissoconium eucalypti	complete ITS1_5.8S_ITS2		Eukaryota; Fungi; Dikarya; Ascomycota; Pezizomycotina; Dothideomycetes; Dothideomycetidae; Capnodiales; Dissoconiaceae; Dissoconium	Dissoconium eucalypti	445179	EF394855		CBS:120039	CBS 120039		CBS:H-19770	ex-type culture of Dissoconium eucalypti
1058	Ewald Groenewald	Uwebraunia australiensis	complete ITS1_5.8S_ITS2		Eukaryota; Fungi; Dikarya; Ascomycota; Pezizomycotina; Dothideomycetes; Dothideomycetidae; Capnodiales; Dissoconiaceae; Uwebraunia	Uwebraunia australiensis	445176	EF394854		CBS:120729	CBS 120729		CBS:H-19837	ex-type culture of Uwebraunia australiensis
1059	Ewald Groenewald	Uwebraunia musae	complete ITS1_5.8S_ITS2	Yes	Eukaryota; Fungi; Dikarya; Ascomycota; Pezizomycotina; Dothideomycetes; Dothideomycetidae; Capnodiales; Dissoconiaceae; Uwebraunia	Uwebraunia musae	513414	EU514225	NR_111322	CBS:122453	CBS 122453;X1021			ex-type culture of Dissoconium musae
1060	Ewald Groenewald	Plenodomus visci	only 5.8S_ITS2 complete, ITS1 partial	Yes	Eukaryota; Fungi; Dikarya; Ascomycota; Pezizomycotina; Dothideomycetes; Pleosporomycetidae; Pleosporales; Pleosporineae; Leptosphaeriaceae; Plenodomus	Plenodomus visci	565430	JF740256		CBS:122783;PD:74/1021	CBS 122783			ex-epitype culture of Plectophomella visci
1061	Ewald Groenewald	Colletotrichum theobromicola	complete ITS1_5.8S_ITS2	Yes	Eukaryota; Fungi; Dikarya; Ascomycota; Pezizomycotina; Sordariomycetes; Hypocreomycetidae; Glomerellales; Glomerellaceae; mitosporic Glomerellaceae; Colletotrichum	Colletotrichum theobromicola	912112	GU994360	NR_111512	CBS:124945	GJS 08-50			ex-neotype culture of Colletotrichum theobromicola
1062	Ewald Groenewald	Colletotrichum tropicale	complete ITS1_5.8S_ITS2	Yes	Eukaryota; Fungi; Dikarya; Ascomycota; Pezizomycotina; Sordariomycetes; Hypocreomycetidae; Glomerellales; Glomerellaceae; mitosporic Glomerellaceae; Colletotrichum	Colletotrichum tropicale	912113	GU994331		CBS:124949;ICMP18653	5101			ex-holotype culture of Colletotrichum tropicale
1063	Ewald Groenewald	Colletotrichum lineola	only 5.8S_ITS2 complete, ITS1 partial	Yes	Eukaryota; Fungi; Dikarya; Ascomycota; Pezizomycotina; Sordariomycetes; Hypocreomycetidae; Glomerellales; Glomerellaceae; mitosporic Glomerellaceae; Colletotrichum	Colletotrichum lineola	708191	GU227829	NR_111454	CBS:125337	CBS 125337			ex-epitype culture of Colletotrichum lineola
1064	Ewald Groenewald	Leptosphaeria etheridgei	only 5.8S_ITS2 complete, ITS1 partial	Yes	Eukaryota; Fungi; Dikarya; Ascomycota; Pezizomycotina; Dothideomycetes; Pleosporomycetidae; Pleosporales; Pleosporineae; Leptosphaeriaceae; Leptosphaeria	Leptosphaeria etheridgei	1077367	JF740221	NR_111620	CBS:125980	CBS 125980			ex-holotype culture of Leptosphaeria etheridgei
1065	Ewald Groenewald	Cercospora kikuchii	only 5.8S_ITS2 complete, ITS1 partial	Yes	Eukaryota; Fungi; Dikarya; Ascomycota; Pezizomycotina; Dothideomycetes; Dothideomycetidae; Capnodiales; Mycosphaerellaceae; Cercospora	Cercospora kikuchii	84275	DQ835070		CBS:128.27;CPC:5068	CBS 128.27;CPC 5068			ex-type culture of Cercosporina kikuchii
1066	Ewald Groenewald	Colletotrichum spinaciae	only 5.8S_ITS2 complete, ITS1 partial	Yes	Eukaryota; Fungi; Dikarya; Ascomycota; Pezizomycotina; Sordariomycetes; Hypocreomycetidae; Glomerellales; Glomerellaceae; mitosporic Glomerellaceae; Colletotrichum	Colletotrichum spinaciae	145974	GU227847		CBS:128.57	CBS 128.57			verified
1067	Ewald Groenewald	Colletotrichum brasiliense	only 5.8S_ITS2 complete, ITS1 partial	Yes	Eukaryota; Fungi; Dikarya; Ascomycota; Pezizomycotina; Sordariomycetes; Hypocreomycetidae; Glomerellales; Glomerellaceae; mitosporic Glomerellaceae; Colletotrichum	Colletotrichum brasiliense	1206799	JQ005235		CBS:128501;ICMP:18607	CBS 128501			ex-holotype culture of Colletotrichum brasiliense
1068	Ewald Groenewald	Colletotrichum constrictum	only 5.8S_ITS2 complete, ITS1 partial	Yes	Eukaryota; Fungi; Dikarya; Ascomycota; Pezizomycotina; Sordariomycetes; Hypocreomycetidae; Glomerellales; Glomerellaceae; mitosporic Glomerellaceae; Colletotrichum	Colletotrichum constrictum	1206802	JQ005238		CBS:128504;ICMP:12941	CBS 128504			ex-holotype culture of Colletotrichum constrictum
1069	Ewald Groenewald	Colletotrichum novae-zelandiae	only 5.8S_ITS2 complete, ITS1 partial	Yes	Eukaryota; Fungi; Dikarya; Ascomycota; Pezizomycotina; Sordariomycetes; Hypocreomycetidae; Glomerellales; Glomerellaceae; mitosporic Glomerellaceae; Colletotrichum	Colletotrichum novae-zelandiae	1206805	JQ005228		CBS:128505;ICMP:12944	CBS 128505			ex-holotype culture of Colletotrichum novae-zelandiae
1070	Ewald Groenewald	Colletotrichum parsonsiae	only 5.8S_ITS2 complete, ITS1 partial	Yes	Eukaryota; Fungi; Dikarya; Ascomycota; Pezizomycotina; Sordariomycetes; Hypocreomycetidae; Glomerellales; Glomerellaceae; mitosporic Glomerellaceae; Colletotrichum	Colletotrichum parsonsiae	1206807	JQ005233		CBS:128525;ICMP:18590	CBS 128525			ex-holotype culture of Colletotrichum parsonsiae
1071	Ewald Groenewald	Colletotrichum beeveri	only 5.8S_ITS2 complete, ITS1 partial	Yes	Eukaryota; Fungi; Dikarya; Ascomycota; Pezizomycotina; Sordariomycetes; Hypocreomycetidae; Glomerellales; Glomerellaceae; mitosporic Glomerellaceae; Colletotrichum	Colletotrichum beeveri	1206798	JQ005171		CBS:128527;ICMP:18594	CBS 128527			ex-holotype culture of Colletotrichum beeveri
1072	Ewald Groenewald	Colletotrichum torulosum	only 5.8S_ITS2 complete, ITS1 partial	Yes	Eukaryota; Fungi; Dikarya; Ascomycota; Pezizomycotina; Sordariomycetes; Hypocreomycetidae; Glomerellales; Glomerellaceae; mitosporic Glomerellaceae; Colletotrichum	Colletotrichum torulosum	1206811	JQ005164		CBS:128544;ICMP:18586	CBS 128544			ex-holotype culture of Colletotrichum torulosum
1073	Ewald Groenewald	Ilyonectria estremocensis	complete ITS1_5.8S_ITS2		Eukaryota; Fungi; Dikarya; Ascomycota; Pezizomycotina; Sordariomycetes; Hypocreomycetidae; Hypocreales; Nectriaceae; Ilyonectria	Ilyonectria estremocensis	1079267	JF735320		CBS:129085	CBS 129085			ex-type culture of Ilyonectria estremocensis
1074	Ewald Groenewald	Ilyonectria alcacerensis	complete ITS1_5.8S_ITS2		Eukaryota; Fungi; Dikarya; Ascomycota; Pezizomycotina; Sordariomycetes; Hypocreomycetidae; Hypocreales; Nectriaceae; Ilyonectria	Ilyonectria alcacerensis	1079268	JF735333		CBS:129087	CBS 129087			ex-type culture of Ilyonectria alcacerensis
1075	Ewald Groenewald	Colletotrichum colombiense	only 5.8S_ITS2 complete, ITS1 partial	Yes	Eukaryota; Fungi; Dikarya; Ascomycota; Pezizomycotina; Sordariomycetes; Hypocreomycetidae; Glomerellales; Glomerellaceae; mitosporic Glomerellaceae; Colletotrichum	Colletotrichum colombiense	1206801	JQ005174	NR_111697	CBS:129818	CBS 129818			ex-holotype culture of Colletotrichum colombiense
1076	Ewald Groenewald	Colletotrichum annellatum	only 5.8S_ITS2 complete, ITS1 partial	Yes	Eukaryota; Fungi; Dikarya; Ascomycota; Pezizomycotina; Sordariomycetes; Hypocreomycetidae; Glomerellales; Glomerellaceae; mitosporic Glomerellaceae; Colletotrichum	Colletotrichum annellatum	1206797	JQ005222	NR_111699	CBS:129826	CBS 129826			ex-holotype culture of Colletotrichum annellatum
1077	Ewald Groenewald	Colletotrichum oncidii	only 5.8S_ITS2 complete, ITS1 partial	Yes	Eukaryota; Fungi; Dikarya; Ascomycota; Pezizomycotina; Sordariomycetes; Hypocreomycetidae; Glomerellales; Glomerellaceae; mitosporic Glomerellaceae; Colletotrichum	Colletotrichum oncidii	1206806	JQ005169	NR_111695	CBS:129828	CBS 129828			ex-holotype culture of Colletotrichum oncidii
1078	Ewald Groenewald	Colletotrichum asianum	complete ITS1_5.8S_ITS2		Eukaryota; Fungi; Dikarya; Ascomycota; Pezizomycotina; Sordariomycetes; Hypocreomycetidae; Glomerellales; Glomerellaceae; mitosporic Glomerellaceae; Colletotrichum	Colletotrichum asianum	702518	FJ972612		CBS:130418	BPDI4			ex-holotype culture of Colletotrichum asianum
1079	Marieka Gryzenhout	Aurantiosacculus eucalyptorum	complete ITS1_5.8S_ITS2		Eukaryota; Fungi; Dikarya; Ascomycota; Pezizomycotina; Sordariomycetes; Sordariomycetidae; Diaporthales; Cryphonectriaceae; Aurantiosacculus	Aurantiosacculus eucalyptorum	1198979	JQ685515		CBS:130826	CPC 13229		CBS:H-20934	ex-holotype culture of Aurantiosacculus eucalyptorum
1080	Ewald Groenewald	Colletotrichum graminicola	only 5.8S_ITS2 complete, ITS1 partial	Yes	Eukaryota; Fungi; Dikarya; Ascomycota; Pezizomycotina; Sordariomycetes; Hypocreomycetidae; Glomerellales; Glomerellaceae; mitosporic Glomerellaceae; Colletotrichum	Colletotrichum graminicola	31870	DQ003110	NR_111190	CBS:130836	M 1.001			ex-epitype culture of Colletotrichum graminicola
1081	Ewald Groenewald	Colletotrichum sublineola	complete ITS1_5.8S_ITS2	Yes	Eukaryota; Fungi; Dikarya; Ascomycota; Pezizomycotina; Sordariomycetes; Hypocreomycetidae; Glomerellales; Glomerellaceae; mitosporic Glomerellaceae; Colletotrichum	Colletotrichum sublineola	1173701	DQ003114	NR_111191	CBS:131301	S3.001			ex-epitype culture of Colletotrichum sublineola
1082	Ewald Groenewald	Pilidiella tibouchinae	complete ITS1_5.8S_ITS2	CATTG	Eukaryota; Fungi; Dikarya; Ascomycota; Pezizomycotina; Sordariomycetes; Sordariomycetidae; Diaporthales; Melanconidaceae; Schizoparme complex; mitosporic Schizoparme; Pilidiella	Pilidiella tibouchinae	1213739	JQ281775	NR_111706	CPC:18512	BECM2			ex-holotype culture of Pilidiella tibouchinae
1083	Ewald Groenewald	Harknessia weresubiae	complete ITS1_5.8S_ITS2		Eukaryota; Fungi; Dikarya; Ascomycota; Pezizomycotina; Sordariomycetes; Sordariomycetidae; Diaporthales; Harknessiaceae; Harknessia	Harknessia weresubiae	308554	JQ706122		CBS:132128	CPC 17670			ex-epitype culture of Harknessia weresubiae
1084	Marieka Gryzenhout	Auratiopycnidiella tristaniopsis	complete ITS1_5.8S_ITS2		Eukaryota; Fungi; Dikarya; Ascomycota; Pezizomycotina; Sordariomycetes; Sordariomycetidae; Diaporthales; Auratiopycnidiella	Auratiopycnidiella tristaniopsis	1198982	JQ685516		CBS:132180	CPC 16371		CBS:H-20932	ex-type culture of Auratiopycnidiella tristaniopsis
1085	Marieka Gryzenhout	Aurantiosacculus acutatus	complete ITS1_5.8S_ITS2		Eukaryota; Fungi; Dikarya; Ascomycota; Pezizomycotina; Sordariomycetes; Sordariomycetidae; Diaporthales; Cryphonectriaceae; Aurantiosacculus	Aurantiosacculus acutatus	1198978	JQ685514		CBS:132181	CPC 13704		CBS:H-20933	ex-holotype culture of Aurantiosacculus acutatus
1086	Ewald Groenewald	Disculoides eucalypti	complete ITS1_5.8S_ITS2		Eukaryota; Fungi; Dikarya; Ascomycota; Pezizomycotina; Sordariomycetes; Sordariomycetidae; Diaporthales; Disculoides	Disculoides eucalypti	1198984	JQ685517		CBS:132183	CPC 17650			ex-type culture of Disculoides eucalypti
1087	Ewald Groenewald	Disculoides eucalyptorum	complete ITS1_5.8S_ITS2		Eukaryota; Fungi; Dikarya; Ascomycota; Pezizomycotina; Sordariomycetes; Sordariomycetidae; Diaporthales; Disculoides	Disculoides eucalyptorum	1198985	JQ685518		CBS:132184	CPC 17648			ex-type culture of Disculoides eucalyptorum
1088	Ewald Groenewald	Cercospora chrysanthemoides	complete ITS1_5.8S_ITS2	Yes	Eukaryota; Fungi; Dikarya; Ascomycota; Pezizomycotina; Dothideomycetes; Dothideomycetidae; Capnodiales; Mycosphaerellaceae; Cercospora	Cercospora chrysanthemoides	1280615	KC005779	NR_111827	CPC:20529				ex-type culture of Cercospora chrysanthemoides
1089	Ewald Groenewald	Plenodomus enteroleucus	only 5.8S_ITS2 complete, ITS1 partial	Yes	Eukaryota; Fungi; Dikarya; Ascomycota; Pezizomycotina; Dothideomycetes; Pleosporomycetidae; Pleosporales; Pleosporineae; Leptosphaeriaceae; Plenodomus	Plenodomus enteroleucus	1077365	JF740214	NR_111619	CBS:142.84	CBS 142.84			ex-epitype culture of Phoma enteroleuca var. enteroleuca
1090	Ewald Groenewald	Colletotrichum psidii	complete ITS1_5.8S_ITS2		Eukaryota; Fungi; Dikarya; Ascomycota; Pezizomycotina; Sordariomycetes; Hypocreomycetidae; Glomerellales; Glomerellaceae; mitosporic Glomerellaceae; Colletotrichum	Colletotrichum psidii	1215366	JX010219		CBS:145.29	CBS 145.29			verified
1091	Ewald Groenewald	Colletotrichum truncatum	only 5.8S_ITS2 complete, ITS1 partial	Yes	Eukaryota; Fungi; Dikarya; Ascomycota; Pezizomycotina; Sordariomycetes; Hypocreomycetidae; Glomerellales; Glomerellaceae; mitosporic Glomerellaceae; Colletotrichum	Colletotrichum truncatum	5467	GU227862	NR_111458	CBS:151.35	CBS 151.35			ex-epitype culture of Colletotrichum truncatum
1092	Ewald Groenewald	Colletotrichum phaseolorum	only 5.8S_ITS2 complete, ITS1 partial	Yes	Eukaryota; Fungi; Dikarya; Ascomycota; Pezizomycotina; Sordariomycetes; Hypocreomycetidae; Glomerellales; Glomerellaceae; mitosporic Glomerellaceae; Colletotrichum	Colletotrichum phaseolorum	708201	GU227896		CBS:157.36	CBS 157.36			verified
1093	Ewald Groenewald	Colletotrichum spaethianum	only 5.8S_ITS2 complete, ITS1 partial	Yes	Eukaryota; Fungi; Dikarya; Ascomycota; Pezizomycotina; Sordariomycetes; Hypocreomycetidae; Glomerellales; Glomerellaceae; mitosporic Glomerellaceae; Colletotrichum	Colletotrichum spaethianum	700344	GU227807	NR_111451	CBS:167.49	CBS 167.49			ex-epitype culture of Colletotrichum spaethianum
1094	Ewald Groenewald	Colletotrichum phyllanthi	only 5.8S_ITS2 complete, ITS1 partial	Yes	Eukaryota; Fungi; Dikarya; Ascomycota; Pezizomycotina; Sordariomycetes; Hypocreomycetidae; Glomerellales; Glomerellaceae; mitosporic Glomerellaceae; Colletotrichum	Colletotrichum phyllanthi	1206809	JQ005221	NR_111698	CBS:175.67	CBS 175.67			ex-holotype culture of Glomerella phyllanthi
1095	Ewald Groenewald	Colletotrichum trichellum	only 5.8S_ITS2 complete, ITS1 partial	Yes	Eukaryota; Fungi; Dikarya; Ascomycota; Pezizomycotina; Sordariomycetes; Hypocreomycetidae; Glomerellales; Glomerellaceae; mitosporic Glomerellaceae; Colletotrichum	Colletotrichum trichellum	34411	GU227812		CBS:217.64	CBS 217.64			verified
1096	Ewald Groenewald	Colletotrichum circinans	only 5.8S_ITS2 complete, ITS1 partial	Yes	Eukaryota; Fungi; Dikarya; Ascomycota; Pezizomycotina; Sordariomycetes; Hypocreomycetidae; Glomerellales; Glomerellaceae; mitosporic Glomerellaceae; Colletotrichum	Colletotrichum circinans	145973	GU227855	NR_111457	CBS:221.81	CBS 221.81			ex-epitype culture of Colletotrichum circinans
1097	Ewald Groenewald	Plenodomus congestus	only 5.8S_ITS2 complete, ITS1 partial	Yes	Eukaryota; Fungi; Dikarya; Ascomycota; Pezizomycotina; Dothideomycetes; Pleosporomycetidae; Pleosporales; Pleosporineae; Leptosphaeriaceae; Plenodomus	Plenodomus congestus	178140	AF439460	NR_111068	CBS:244.64	CBS 244.64			ex-holotype culture of Leptosphaeria congesta
1098	Ewald Groenewald	Cercospora althaeina	only 5.8S_ITS2 complete, ITS1 partial	Yes	Eukaryota; Fungi; Dikarya; Ascomycota; Pezizomycotina; Dothideomycetes; Dothideomycetidae; Capnodiales; Mycosphaerellaceae; Cercospora	Cercospora althaeina	1238168	JX143530	NR_111770	CBS:248.67	CBS 248.67			ex-epitype culture of Cercospora althaeina
1099	Ewald Groenewald	Cercospora armoraciae	only 5.8S_ITS2 complete, ITS1 partial	Yes	Eukaryota; Fungi; Dikarya; Ascomycota; Pezizomycotina; Dothideomycetes; Dothideomycetidae; Capnodiales; Mycosphaerellaceae; Cercospora	Cercospora armoraciae	1238170	JX143545	NR_111771	CBS:250.67	CBS 250.67			ex-epitype culture of Cercospora armoraciae
1100	Ewald Groenewald	Cercospora violae	only 5.8S_ITS2 complete, ITS1 partial	Yes	Eukaryota; Fungi; Dikarya; Ascomycota; Pezizomycotina; Dothideomycetes; Dothideomycetidae; Capnodiales; Mycosphaerellaceae; Cercospora	Cercospora violae	179340	JX143737	NR_111774	CBS:251.67	CBS 251.67			ex-epitype culture of Cercospora violae
1101	Ewald Groenewald	Cercospora olivascens	only 5.8S_ITS2 complete, ITS1 partial	Yes	Eukaryota; Fungi; Dikarya; Ascomycota; Pezizomycotina; Dothideomycetes; Dothideomycetidae; Capnodiales; Mycosphaerellaceae; Cercospora	Cercospora olivascens	1238187	JX143632	NR_111773	CBS:253.67	CBS 253.67			ex-type culture of Cercospora olivascens
1102	Ewald Groenewald	Colletotrichum alatae	complete ITS1_5.8S_ITS2		Eukaryota; Fungi; Dikarya; Ascomycota; Pezizomycotina; Sordariomycetes; Hypocreomycetidae; Glomerellales; Glomerellaceae; mitosporic Glomerellaceae; Colletotrichum	Colletotrichum alatae	1215735	JX010190		ICMP:17919	C1275.5			ex-holotype culture of Colletotrichum alatae
1103	Ewald Groenewald	Paraleptosphaeria nitschkei	only 5.8S_ITS2 complete, ITS1 partial	Yes	Eukaryota; Fungi; Dikarya; Ascomycota; Pezizomycotina; Dothideomycetes; Pleosporomycetidae; Pleosporales; Pleosporineae; Leptosphaeriaceae; Paraleptosphaeria	Paraleptosphaeria nitschkei	1075100	JF740239	NR_111621	CBS:306.51	CBS 306.51			ex-epitype culture of Leptosphaeria nitschkei
1104	Ewald Groenewald	Dissoconium aciculare	complete ITS1_5.8S_ITS2	Yes	Eukaryota; Fungi; Dikarya; Ascomycota; Pezizomycotina; Dothideomycetes; Dothideomycetidae; Capnodiales; Dissoconiaceae; Dissoconium	Dissoconium aciculare	112489	AF173308		CBS:342.82;STEU:1534	STE-U 1534			ex-type culture of Dissoconium aciculare
1105	Ewald Groenewald	Heterospora dimorphospora	only 5.8S_ITS2 complete, ITS1 partial	Yes	Eukaryota; Fungi; Dikarya; Ascomycota; Pezizomycotina; Dothideomycetes; Pleosporomycetidae; Pleosporales; Pleosporineae; Leptosphaeriaceae; Heterospora	Heterospora dimorphospora	749829	JF740203	NR_111618	CBS:345.78	CBS 345.78			ex-epitype culture of Phyllosticta dimorphospora
1106	Ewald Groenewald	Coniothyrium multiporum	only 5.8S_ITS2 complete, ITS1 partial	Yes	Eukaryota; Fungi; Dikarya; Ascomycota; Pezizomycotina; Dothideomycetes; Pleosporomycetidae; Pleosporales; mitosporic Pleosporales; Coniothyrium	Coniothyrium multiporum	749857	JF740187	NR_111617	CBS:353.65	CBS 353.65			ex-holotype culture of Phoma multipora
1107	Ewald Groenewald	Pyrenochaetopsis pratorum	only 5.8S_ITS2 complete, ITS1 partial	Yes	Eukaryota; Fungi; Dikarya; Ascomycota; Pezizomycotina; Dothideomycetes; Pleosporomycetidae; Pleosporales; Cucurbitariaceae; Pyrenochaetopsis	Pyrenochaetopsis pratorum	1077384	JF740263	NR_111623	CBS:445.81	CBS 445.81			ex-isotype culture of Phoma pratorum
1108	Ewald Groenewald	Heterospora chenopodii	only 5.8S_ITS2 complete, ITS1 partial	Yes	Eukaryota; Fungi; Dikarya; Ascomycota; Pezizomycotina; Dothideomycetes; Pleosporomycetidae; Pleosporales; Pleosporineae; Leptosphaeriaceae; Heterospora	Heterospora chenopodii	565428	FJ427023	NR_111368	CBS:448.68	CBS 448.68			ex-epitype culture of Heterospora chenopodii
1109	Ewald Groenewald	Colletotrichum nupharicola	complete ITS1_5.8S_ITS2		Eukaryota; Fungi; Dikarya; Ascomycota; Pezizomycotina; Sordariomycetes; Hypocreomycetidae; Glomerellales; Glomerellaceae; mitosporic Glomerellaceae; Colletotrichum	Colletotrichum nupharicola	1215361	JX010187		CBS:470.96	C1275.25			ex-holotype culture of Colletotrichum nupharicola
1110	Ewald Groenewald	Colletotrichum tofieldiae	only 5.8S_ITS2 complete, ITS1 partial	Yes	Eukaryota; Fungi; Dikarya; Ascomycota; Pezizomycotina; Sordariomycetes; Hypocreomycetidae; Glomerellales; Glomerellaceae; mitosporic Glomerellaceae; Colletotrichum	Colletotrichum tofieldiae	708197	GU227801		CBS:495.85	CBS 495.85			verified
1111	Ewald Groenewald	Colletotrichum nymphaeae	only 5.8S_ITS2 complete, ITS1 partial	Yes	Eukaryota; Fungi; Dikarya; Ascomycota; Pezizomycotina; Sordariomycetes; Hypocreomycetidae; Glomerellales; Glomerellaceae; mitosporic Glomerellaceae; Colletotrichum	Colletotrichum nymphaeae	306554	JQ948197	NR_111736	CBS:515.78	CBS 515.78			ex-epitype culture of Colletotrichum nymphaeae
1112	Ewald Groenewald	Plenodomus chrysanthemi	only 5.8S_ITS2 complete, ITS1 partial	Yes	Eukaryota; Fungi; Dikarya; Ascomycota; Pezizomycotina; Dothideomycetes; Pleosporomycetidae; Pleosporales; Pleosporineae; Leptosphaeriaceae; Plenodomus	Plenodomus chrysanthemi	749876	JF740253	NR_111622	CBS:539.63	CBS 539.63			ex-holotype culture of Cephalosporium chrysanthemi
1113	Ewald Groenewald	Cercospora mercurialis	only 5.8S_ITS2 complete, ITS1 partial	Yes	Eukaryota; Fungi; Dikarya; Ascomycota; Pezizomycotina; Dothideomycetes; Dothideomycetidae; Capnodiales; Mycosphaerellaceae; Cercospora	Cercospora mercurialis	1238185	JX143628	NR_111772	CBS:550.71	CBS 550.71			ex-epitype culture of Cercospora mercurialis
1114	Ewald Groenewald	Uwebraunia dekkeri	complete ITS1_5.8S_ITS2	Yes	Eukaryota; Fungi; Dikarya; Ascomycota; Pezizomycotina; Dothideomycetes; Dothideomycetidae; Capnodiales; Dissoconiaceae; Uwebraunia	Uwebraunia dekkeri	112483	AF173309		CBS:567.89;STEU:1535	STE-U 1535			ex-type culture of Uwebraunia dekkeri
1115	Ewald Groenewald	Dinemasporium strigosum	complete ITS1_5.8S_ITS2		Eukaryota; Fungi; Dikarya; Ascomycota; Pezizomycotina; Sordariomycetes; Sordariomycetidae; Chaetosphaeriales; Chaetosphaeriaceae; mitosporic Chaetosphaeriaceae; Dinemasporium	Dinemasporium strigosum	1196449	JQ889283		CBS:828.84	CBS 828.84			ex-epitype culture of Dinemasporium strigosum
1116	Sung-Oui Suh	Agaricus cupressophilus	only 5.8S_ITS2 complete, ITS1 partial	Yes	Eukaryota; Fungi; Dikarya; Basidiomycota; Agaricomycotina; Agaricomycetes; Agaricomycetidae; Agaricales; Agaricaceae; Agaricus	Agaricus cupressophilus	498494	FJ172288	NR_111346	ATCC:MYA-4431	ATCC MYA-4431			ex-type culture of Agaricus cupressophilus
1118	Sung-Oui Suh	Alternaria eichhorniae	complete ITS1_5.8S_ITS2	Yes	Eukaryota; Fungi; Dikarya; Ascomycota; Pezizomycotina; Dothideomycetes; Pleosporomycetidae; Pleosporales; Pleosporineae; Pleosporaceae; Alternaria	Alternaria eichhorniae	489833	KC146356	NR_111832	ATCC:22255	ATCC 22255			ex-type culture of Alternaria eichhorniae
1119	Sung-Oui Suh	Arnium gigantosporum	complete ITS1_5.8S_ITS2	Yes	Eukaryota; Fungi; Dikarya; Ascomycota; Pezizomycotina; Sordariomycetes; Sordariomycetidae; Sordariales; Lasiosphaeriaceae; Arnium	Arnium gigantosporum	565291	FJ196771	NR_111349	ATCC:MYA-4170	ATCC MYA-4170			ex-type culture of Arnium gigantosporum
1120	Sung-Oui Suh	Aspergillus affinis	complete ITS1_5.8S_ITS2		Eukaryota; Fungi; Dikarya; Ascomycota; Pezizomycotina; Eurotiomycetes; Eurotiomycetidae; Eurotiales; Aspergillaceae; Aspergillus	Aspergillus affinis	1070780	JN882309	NR_111684	ATCC:MYA-4773	ATCC MYA-4773			ex-type culture of Aspergillus affinis
1121	Sung-Oui Suh	Aspergillus brasiliensis	only 5.8S_ITS2 complete, ITS1 partial	Yes	Eukaryota; Fungi; Dikarya; Ascomycota; Pezizomycotina; Eurotiomycetes; Eurotiomycetidae; Eurotiales; Aspergillaceae; Aspergillus	Aspergillus brasiliensis	319629	FJ810517	NR_111414	ATCC:MYA-4553	ATCC MYA-4553			ex-type culture of Aspergillus brasiliensis
1122	Sung-Oui Suh	Aspergillus clavatus	complete ITS1_5.8S_ITS2		Eukaryota; Fungi; Dikarya; Ascomycota; Pezizomycotina; Eurotiomycetes; Eurotiomycetidae; Eurotiales; Aspergillaceae; Aspergillus	Aspergillus clavatus	5057	HQ026749		ATCC:1007	ATCC 1007			ex-type culture of Aspergillus clavatus
1123	Sung-Oui Suh	Aspergillus fumigatus	complete ITS1_5.8S_ITS2		Eukaryota; Fungi; Dikarya; Ascomycota; Pezizomycotina; Eurotiomycetes; Eurotiomycetidae; Eurotiales; Aspergillaceae; Aspergillus	Aspergillus fumigatus	746128	HQ026746		ATCC:1022	ATCC 1022			ex-type culture of Aspergillus fumigatus
1125	Sung-Oui Suh	Aspergillus niger	complete ITS1_5.8S_ITS2	Yes	Eukaryota; Fungi; Dikarya; Ascomycota; Pezizomycotina; Eurotiomycetes; Eurotiomycetidae; Eurotiales; Aspergillaceae; Aspergillus	Aspergillus niger	5061	FJ195350	NR_111348	ATCC:16888	ATCC 16888			ex-neotype culture of Aspergillus niger
1126	Sung-Oui Suh	Aspergillus tanneri	only 5.8S_ITS2 complete, ITS1 partial	Yes	Eukaryota; Fungi; Dikarya; Ascomycota; Pezizomycotina; Eurotiomycetes; Eurotiomycetidae; Eurotiales; Aspergillaceae; Aspergillus	Aspergillus tanneri	1220188	KC178688	NR_111840	ATCC:MYA-4905	ATCC MYA-4905			ex-type culture of Aspergillus tanneri
1127	Sung-Oui Suh	Botrytis caroliniana	only 5.8S_ITS2 complete, ITS1 partial	Yes	Eukaryota; Fungi; Dikarya; Ascomycota; Pezizomycotina; Leotiomycetes; Helotiales; Sclerotiniaceae; mitosporic Sclerotiniaceae; Botrytis	Botrytis caroliniana	1280835	KC171350	NR_111839	ATCC:MYA-4856	ATCC MYA-4856			ex-type culture of Botrytis caroliniana
1128	Sung-Oui Suh	Candida alai	complete ITS1_5.8S_ITS2	Yes	Eukaryota; Fungi; Dikarya; Ascomycota; Saccharomycotina; Saccharomycetes; Saccharomycetales; mitosporic Saccharomycetales; Candida	Candida alai	434040	FJ623626	NR_111408	ATCC:MYA-4364	ATCC MYA-4364			ex-type culture of Candida alai
1129	Sung-Oui Suh	Candida amphicis	complete ITS1_5.8S_ITS2	Yes	Eukaryota; Fungi; Dikarya; Ascomycota; Saccharomycotina; Saccharomycetes; Saccharomycetales; mitosporic Saccharomycetales; Candida	Candida amphicis	271310	FJ172251	NR_111341	ATCC:MYA-4331	ATCC MYA-4331			ex-type culture of Candida amphixiae
1130	Sung-Oui Suh	Candida anneliseae	complete ITS1_5.8S_ITS2	Yes	Eukaryota; Fungi; Dikarya; Ascomycota; Saccharomycotina; Saccharomycetes; Saccharomycetales; mitosporic Saccharomycetales; Candida	Candida anneliseae	246025	FJ623603	NR_111386	ATCC:MYA-4321	ATCC MYA-4321			ex-type culture of Candida anneliseae
1131	Sung-Oui Suh	Candida ascalaphidarum	complete ITS1_5.8S_ITS2	Yes	Eukaryota; Fungi; Dikarya; Ascomycota; Saccharomycotina; Saccharomycetes; Saccharomycetales; mitosporic Saccharomycetales; Candida	Candida ascalaphidarum	391823	FJ623623	NR_111405	ATCC:MYA-4358	ATCC MYA-4358			ex-type culture of Candida ascalaphidarum
1132	Sung-Oui Suh	Candida atakaporum	complete ITS1_5.8S_ITS2	Yes	Eukaryota; Fungi; Dikarya; Ascomycota; Saccharomycotina; Saccharomycetes; Saccharomycetales; mitosporic Saccharomycetales; Candida	Candida atakaporum	246088	FJ623600	NR_111383	ATCC:MYA-4317	ATCC MYA-4317			ex-type culture of Candida atakaporum
1133	Sung-Oui Suh	Candida atbi	complete ITS1_5.8S_ITS2	Yes	Eukaryota; Fungi; Dikarya; Ascomycota; Saccharomycotina; Saccharomycetes; Saccharomycetales; mitosporic Saccharomycetales; Candida	Candida atbi	348314	FJ623618	NR_111401	ATCC:MYA-4351	ATCC MYA-4351			ex-type culture of Candida atbi
1134	Sung-Oui Suh	Candida athensensis	complete ITS1_5.8S_ITS2	Yes	Eukaryota; Fungi; Dikarya; Ascomycota; Saccharomycotina; Saccharomycetes; Saccharomycetales; mitosporic Saccharomycetales; Candida	Candida athensensis	304220	FJ172250	NR_111340	ATCC:MYA-4324	ATCC MYA-4324			ex-type culture of Candida athensensis
1135	Sung-Oui Suh	Candida blackwelliae	complete ITS1_5.8S_ITS2		Eukaryota; Fungi; Dikarya; Ascomycota; Saccharomycotina; Saccharomycetes; Saccharomycetales; mitosporic Saccharomycetales; Candida	Candida blackwelliae	497110	GU291260	NR_111470	ATCC:MYA-4592	ATCC MYA-4592			ex-type culture of Candida blackwellae
1136	Sung-Oui Suh	Candida blattae	complete ITS1_5.8S_ITS2	Yes	Eukaryota; Fungi; Dikarya; Ascomycota; Saccharomycotina; Saccharomycetes; Saccharomycetales; mitosporic Saccharomycetales; Candida	Candida blattae	391824	FJ623625	NR_111407	ATCC:MYA-4360	ATCC MYA-4360			ex-type culture of Candida blattae
1137	Sung-Oui Suh	Candida blattariae	complete ITS1_5.8S_ITS2	Yes	Eukaryota; Fungi; Dikarya; Ascomycota; Saccharomycotina; Saccharomycetes; Saccharomycetales; mitosporic Saccharomycetales; Candida	Candida blattariae	297794	FJ623607	NR_111390	ATCC:MYA-4330	ATCC MYA-4330			ex-type culture of Candida blattariae
1138	Sung-Oui Suh	Candida bohioensis	complete ITS1_5.8S_ITS2		Eukaryota; Fungi; Dikarya; Ascomycota; Saccharomycotina; Saccharomycetes; Saccharomycetales; mitosporic Saccharomycetales; Candida	Candida bohioensis	561986	FJ172255	NR_111344	ATCC:MYA-4363	ATCC MYA-4363			ex-type culture of Candida bohiensis
1139	Sung-Oui Suh	Candida bokatorum	complete ITS1_5.8S_ITS2	Yes	Eukaryota; Fungi; Dikarya; Ascomycota; Saccharomycotina; Saccharomycetes; Saccharomycetales; mitosporic Saccharomycetales; Candida	Candida bokatorum	246048	FJ623595	NR_111378	ATCC:MYA-4308	ATCC MYA-4308			ex-type culture of Candida bokatorum
1140	Sung-Oui Suh	Candida buenavistaensis	complete ITS1_5.8S_ITS2	Yes	Eukaryota; Fungi; Dikarya; Ascomycota; Saccharomycotina; Saccharomycetes; Saccharomycetales; mitosporic Saccharomycetales; Candida	Candida buenavistaensis	434039	FJ623627	NR_111409	ATCC:MYA-4365	ATCC MYA-4365			ex-type culture of Candida buenavistaensis
1141	Sung-Oui Suh	Candida cerambycidarum	complete ITS1_5.8S_ITS2	Yes	Eukaryota; Fungi; Dikarya; Ascomycota; Saccharomycotina; Saccharomycetes; Saccharomycetales; mitosporic Saccharomycetales; Candida	Candida cerambycidarum	271315	FJ623609	NR_111392	ATCC:MYA-4333	ATCC MYA-4333			ex-type culture of Candida cerambycidarum
1142	Sung-Oui Suh	Candida chauliodis	complete ITS1_5.8S_ITS2	Yes	Eukaryota; Fungi; Dikarya; Ascomycota; Saccharomycotina; Saccharomycetes; Saccharomycetales; mitosporic Saccharomycetales; Candida	Candida chauliodis	391825	FJ623621	NR_111403	ATCC:MYA-4356	ATCC MYA-4356			ex-type culture of Candida chauliodes
1143	Sung-Oui Suh	Candida choctaworum	complete ITS1_5.8S_ITS2	Yes	Eukaryota; Fungi; Dikarya; Ascomycota; Saccharomycotina; Saccharomycetes; Saccharomycetales; mitosporic Saccharomycetales; Candida	Candida choctaworum	246021	FJ623598	NR_111381	ATCC:MYA-4315	ATCC MYA-4315			ex-type culture of Candida choctaworum
1144	Sung-Oui Suh	Candida chrysomelidarum	complete ITS1_5.8S_ITS2	Yes	Eukaryota; Fungi; Dikarya; Ascomycota; Saccharomycotina; Saccharomycetes; Saccharomycetales; mitosporic Saccharomycetales; Candida	Candida chrysomelidarum	271316	FJ623613	NR_111396	ATCC:MYA-4344	ATCC MYA-4344			ex-type culture of Candida chrysomelidarum
1146	Sung-Oui Suh	Candida corydali	complete ITS1_5.8S_ITS2	Yes	Eukaryota; Fungi; Dikarya; Ascomycota; Saccharomycotina; Saccharomycetes; Saccharomycetales; mitosporic Saccharomycetales; Candida	Candida corydali	391826	FJ623622	NR_111404	ATCC:MYA-4357	ATCC MYA-4357			ex-type culture of Candida corydali
1147	Sung-Oui Suh	Candida derodonti	complete ITS1_5.8S_ITS2	Yes	Eukaryota; Fungi; Dikarya; Ascomycota; Saccharomycotina; Saccharomycetes; Saccharomycetales; mitosporic Saccharomycetales; Candida	Candida derodonti	234567	FJ623605	NR_111388	ATCC:MYA-4327	ATCC MYA-4327			ex-type culture of Candida derodonti
1148	Sung-Oui Suh	Candida dosseyi	complete ITS1_5.8S_ITS2	Yes	Eukaryota; Fungi; Dikarya; Ascomycota; Saccharomycotina; Saccharomycetes; Saccharomycetales; mitosporic Saccharomycetales; Candida	Candida dosseyi	391827	FJ623624	NR_111406	ATCC:MYA-4359	ATCC MYA-4359			ex-type culture of Candida dosseyi
1149	Sung-Oui Suh	Candida elateridarum	complete ITS1_5.8S_ITS2	Yes	Eukaryota; Fungi; Dikarya; Ascomycota; Saccharomycotina; Saccharomycetes; Saccharomycetales; mitosporic Saccharomycetales; Candida	Candida elateridarum	304224	FJ196772	NR_111350	ATCC:MYA-4325	ATCC MYA-4325			ex-type culture of Candida elateridarum
1150	Sung-Oui Suh	Candida endomychidarum	complete ITS1_5.8S_ITS2	Yes	Eukaryota; Fungi; Dikarya; Ascomycota; Saccharomycotina; Saccharomycetes; Saccharomycetales; mitosporic Saccharomycetales; Candida	Candida endomychidarum	271317	FJ623610	NR_111393	ATCC:MYA-4335	ATCC MYA-4335			ex-type culture of Candida endomychidarum
1151	Sung-Oui Suh	Candida fluviatilis	complete ITS1_5.8S_ITS2	Yes	Eukaryota; Fungi; Dikarya; Ascomycota; Saccharomycotina; Saccharomycetes; Saccharomycetales; mitosporic Saccharomycetales; Candida	Candida fluviatilis	45551	HQ652068	NR_111589	ATCC:38621	ATCC 38621			ex-type culture of Candida fluviatilis
1152	Sung-Oui Suh	Candida gatunensis	complete ITS1_5.8S_ITS2	Yes	Eukaryota; Fungi; Dikarya; Ascomycota; Saccharomycotina; Saccharomycetes; Saccharomycetales; mitosporic Saccharomycetales; Candida	Candida gatunensis	392264	FJ623620	NR_111402	ATCC:MYA-4355	ATCC MYA-4355			ex-type culture of Candida gatunensis
1153	Sung-Oui Suh	Candida gorgasii	complete ITS1_5.8S_ITS2	Yes	Eukaryota; Fungi; Dikarya; Ascomycota; Saccharomycotina; Saccharomycetes; Saccharomycetales; mitosporic Saccharomycetales; Candida	Candida gorgasii	271357	FJ172252	NR_111342	ATCC:MYA-4334	ATCC MYA-4334			ex-type culture of Candida gorgasii
1154	Sung-Oui Suh	Candida hungchunana	complete ITS1_5.8S_ITS2	Yes	Eukaryota; Fungi; Dikarya; Ascomycota; Saccharomycotina; Saccharomycetes; Saccharomycetales; mitosporic Saccharomycetales; Candida	Candida hungchunana	1198500	JQ812706	NR_111721	ATCC:MYA-4701	ATCC MYA-4701			ex-type culture of Candida hungchunana
1155	Sung-Oui Suh	Candida jeffriesii	complete ITS1_5.8S_ITS2	Yes	Eukaryota; Fungi; Dikarya; Ascomycota; Saccharomycotina; Saccharomycetes; Saccharomycetales; mitosporic Saccharomycetales; Candida	Candida jeffriesii	271282	FJ623615	NR_111398	ATCC:MYA-4346	ATCC MYA-4346			ex-type culture of Candida jeffriesii
1156	Sung-Oui Suh	Candida jiufengensis	complete ITS1_5.8S_ITS2		Eukaryota; Fungi; Dikarya; Ascomycota; Saccharomycotina; Saccharomycetes; Saccharomycetales; mitosporic Saccharomycetales; Candida	Candida jiufengensis	497108	GU291261	NR_111471	ATCC:MYA-4593	ATCC MYA-4593			ex-type culture of Candida jiufengensis
1157	Sung-Oui Suh	Candida krabiensis	complete ITS1_5.8S_ITS2	Yes	Eukaryota; Fungi; Dikarya; Ascomycota; Saccharomycotina; Saccharomycetes; Saccharomycetales; mitosporic Saccharomycetales; Candida	Candida krabiensis	246386	FJ196784	NR_111359	ATCC:MYA-4469	ATCC MYA-4469			ex-type culture of Candida krabiensis
1158	Sung-Oui Suh	Candida kunorum	complete ITS1_5.8S_ITS2		Eukaryota; Fungi; Dikarya; Ascomycota; Saccharomycotina; Saccharomycetes; Saccharomycetales; mitosporic Saccharomycetales; Candida	Candida kunorum	246081	FJ172246	NR_111337	ATCC:MYA-4309	ATCC MYA-4309			ex-type culture of Candida kunorum
1159	Sung-Oui Suh	Candida labiduridarum	complete ITS1_5.8S_ITS2	Yes	Eukaryota; Fungi; Dikarya; Ascomycota; Saccharomycotina; Saccharomycetes; Saccharomycetales; mitosporic Saccharomycetales; Candida	Candida labiduridarum	434042	FJ623629	NR_111410	ATCC:MYA-4368	ATCC MYA-4368			ex-type culture of Candida labiduridarum
1160	Sung-Oui Suh	Candida lessepsii	complete ITS1_5.8S_ITS2	Yes	Eukaryota; Fungi; Dikarya; Ascomycota; Saccharomycotina; Saccharomycetes; Saccharomycetales; mitosporic Saccharomycetales; Candida	Candida lessepsii	297795	FJ623612	NR_111395	ATCC:MYA-4338	ATCC MYA-4338			ex-type culture of Candida lessepsii
1161	Sung-Oui Suh	Candida lignicola	complete ITS1_5.8S_ITS2	Yes	Eukaryota; Fungi; Dikarya; Ascomycota; Saccharomycotina; Saccharomycetes; Saccharomycetales; mitosporic Saccharomycetales; Candida	Candida lignicola	318678	HQ652074	NR_111590	ATCC:MYA-4674	ATCC MYA-4674			ex-type culture of Candida lignicola
1162	Sung-Oui Suh	Candida lycoperdinae	complete ITS1_5.8S_ITS2	Yes	Eukaryota; Fungi; Dikarya; Ascomycota; Saccharomycotina; Saccharomycetes; Saccharomycetales; mitosporic Saccharomycetales; Candida	Candida lycoperdinae	297653	FJ623617	NR_111400	ATCC:MYA-4350	ATCC MYA-4350			ex-type culture of Candida lycoperdinae
1163	Sung-Oui Suh	Candida maxii	complete ITS1_5.8S_ITS2	Yes	Eukaryota; Fungi; Dikarya; Ascomycota; Saccharomycotina; Saccharomycetes; Saccharomycetales; mitosporic Saccharomycetales; Candida	Candida maxii	246000	FJ623602	NR_111385	ATCC:MYA-4320	ATCC MYA-4320			ex-type culture of Candida maxii
1164	Sung-Oui Suh	Candida michaelii	complete ITS1_5.8S_ITS2	Yes	Eukaryota; Fungi; Dikarya; Ascomycota; Saccharomycotina; Saccharomycetes; Saccharomycetales; mitosporic Saccharomycetales; Candida	Candida michaelii	271314	FJ623608	NR_111391	ATCC:MYA-4332	ATCC MYA-4332			ex-type culture of Candida michaelii
1165	Sung-Oui Suh	Candida olivae	complete ITS1_5.8S_ITS2	Yes	Eukaryota; Fungi; Dikarya; Ascomycota; Saccharomycotina; Saccharomycetes; Saccharomycetales; mitosporic Saccharomycetales; Candida	Candida olivae	681098	GU327626	NR_111477	ATCC:MYA-4568	ATCC MYA-4568			ex-type culture of Candida olivae
1166	Sung-Oui Suh	Candida oxycetoniae	complete ITS1_5.8S_ITS2		Eukaryota; Fungi; Dikarya; Ascomycota; Saccharomycotina; Saccharomycetes; Saccharomycetales; mitosporic Saccharomycetales; Candida	Candida oxycetoniae	497107	GU291262	NR_111472	ATCC:MYA-4594	ATCC MYA-4594			ex-type culture of Candida oxycetoniae
1167	Sung-Oui Suh	Candida palmyrensis	complete ITS1_5.8S_ITS2	Yes	Eukaryota; Fungi; Dikarya; Ascomycota; Saccharomycotina; Saccharomycetes; Saccharomycetales; mitosporic Saccharomycetales; Candida	Candida palmyrensis	641393	FJ381697	NR_111362	ATCC:62899	ATCC 62899			ex-type culture of Candida palmyrensis
1168	Sung-Oui Suh	Candida phangngaensis	complete ITS1_5.8S_ITS2	Yes	Eukaryota; Fungi; Dikarya; Ascomycota; Saccharomycotina; Saccharomycetes; Saccharomycetales; mitosporic Saccharomycetales; Candida	Candida phangngaensis	444778	FJ196782	NR_111357	ATCC:MYA-4467	ATCC MYA-4467			ex-type culture of Candida phangngensis
1169	Sung-Oui Suh	Candida pimensis	complete ITS1_5.8S_ITS2	Yes	Eukaryota; Fungi; Dikarya; Ascomycota; Saccharomycotina; Saccharomycetes; Saccharomycetales; mitosporic Saccharomycetales; Candida	Candida pimensis	261282	FJ623594	NR_111377	ATCC:MYA-4306	ATCC MYA-4306			ex-type culture of Candida pimensis
1170	Sung-Oui Suh	Candida plutei	complete ITS1_5.8S_ITS2	Yes	Eukaryota; Fungi; Dikarya; Ascomycota; Saccharomycotina; Saccharomycetes; Saccharomycetales; mitosporic Saccharomycetales; Candida	Candida plutei	271264	FJ623606	NR_111389	ATCC:MYA-4329	ATCC MYA-4329			ex-type culture of Candida plutei
1171	Sung-Oui Suh	Candida pseudoglaebosa	complete ITS1_5.8S_ITS2	Yes	Eukaryota; Fungi; Dikarya; Ascomycota; Saccharomycotina; Saccharomycetes; Saccharomycetales; mitosporic Saccharomycetales; Candida	Candida pseudoglaebosa	52255	HQ652066	NR_111588	ATCC:28472	ATCC 28472			ex-type culture of Candida pseudoglaebosa
1172	Sung-Oui Suh	Candida pseudojiufengensis	complete ITS1_5.8S_ITS2		Eukaryota; Fungi; Dikarya; Ascomycota; Saccharomycotina; Saccharomycetes; Saccharomycetales; mitosporic Saccharomycetales; Candida	Candida pseudojiufengensis	497109	GU291263	NR_111473	ATCC:MYA-4595	ATCC MYA-4595			ex-type culture of Candida pseudojiufengensis
1173	Sung-Oui Suh	Candida sinolaborantium	complete ITS1_5.8S_ITS2	Yes	Eukaryota; Fungi; Dikarya; Ascomycota; Saccharomycotina; Saccharomycetes; Saccharomycetales; mitosporic Saccharomycetales; Candida	Candida sinolaborantium	271313	FJ172253	NR_111343	ATCC:MYA-4337	ATCC MYA-4337			ex-type culture of Candida sinolaborantium
1174	Sung-Oui Suh	Candida sithepensis	complete ITS1_5.8S_ITS2	Yes	Eukaryota; Fungi; Dikarya; Ascomycota; Saccharomycotina; Saccharomycetes; Saccharomycetales; mitosporic Saccharomycetales; Candida	Candida sithepensis	246387	FJ196785	NR_111360	ATCC:MYA-4470	ATCC MYA-4470			ex-type culture of Candida sithepensis
1175	Sung-Oui Suh	Candida smagusa	complete ITS1_5.8S_ITS2		Eukaryota; Fungi; Dikarya; Ascomycota; Saccharomycotina; Saccharomycetes; Saccharomycetales; mitosporic Saccharomycetales; Candida	Candida smagusa	1072099	HQ999979	NR_111611	ATCC:MYA-4755	ATCC MYA-4755			ex-type culture of Candida smagusa
1176	Sung-Oui Suh	Candida smithsonii	complete ITS1_5.8S_ITS2	Yes	Eukaryota; Fungi; Dikarya; Ascomycota; Saccharomycotina; Saccharomycetes; Saccharomycetales; mitosporic Saccharomycetales; Candida	Candida smithsonii	304223	FJ172249	NR_111339	ATCC:MYA-4323	ATCC MYA-4323			ex-type culture of Candida smithsonii
1178	Sung-Oui Suh	Candida takata	only 5.8S_ITS2 complete;ITS1 partial	Yes	Eukaryota; Fungi; Dikarya; Ascomycota; Saccharomycotina; Saccharomycetes; Saccharomycetales; mitosporic Saccharomycetales; Candida	Candida takata	1198497	JQ906769	NR_111725	ATCC:MYA-4702	ATCC MYA-4702			ex-type culture of Candida takata
1179	Sung-Oui Suh	Candida taliae	complete ITS1_5.8S_ITS2	Yes	Eukaryota; Fungi; Dikarya; Ascomycota; Saccharomycotina; Saccharomycetes; Saccharomycetales; mitosporic Saccharomycetales; Candida	Candida taliae	234523	FJ623604	NR_111387	ATCC:MYA-4322	ATCC MYA-4322			ex-type culture of Candida taliae
1180	Sung-Oui Suh	Candida taoyuanica	complete ITS1_5.8S_ITS2	Yes	Eukaryota; Fungi; Dikarya; Ascomycota; Saccharomycotina; Saccharomycetes; Saccharomycetales; mitosporic Saccharomycetales; Candida	Candida taoyuanica	1198499	JQ812705	NR_111720	ATCC:MYA-4700	ATCC MYA-4700			ex-type culture of Candida taoyuanica
1181	Sung-Oui Suh	Candida temnochilae	complete ITS1_5.8S_ITS2	Yes	Eukaryota; Fungi; Dikarya; Ascomycota; Saccharomycotina; Saccharomycetes; Saccharomycetales; mitosporic Saccharomycetales; Candida	Candida temnochilae	234530	FJ623611	NR_111394	ATCC:MYA-4336	ATCC MYA-4336			ex-type culture of Candida temnochilae
1182	Sung-Oui Suh	Candida tetrigidarum	complete ITS1_5.8S_ITS2	Yes	Eukaryota; Fungi; Dikarya; Ascomycota; Saccharomycotina; Saccharomycetes; Saccharomycetales; mitosporic Saccharomycetales; Candida	Candida tetrigidarum	434046	FJ623630	NR_111411	ATCC:MYA-4369	ATCC MYA-4369			ex-type culture of Candida tetrigidarum
1183	Sung-Oui Suh	Candida thaimueangensis	complete ITS1_5.8S_ITS2	Yes	Eukaryota; Fungi; Dikarya; Ascomycota; Saccharomycotina; Saccharomycetes; Saccharomycetales; mitosporic Saccharomycetales; Candida	Candida thaimueangensis	392265	FJ196783	NR_111358	ATCC:MYA-4468	ATCC MYA-4468			ex-type culture of Candida thaimueangensis
1184	Sung-Oui Suh	Candida theae	complete ITS1_5.8S_ITS2	Yes	Eukaryota; Fungi; Dikarya; Ascomycota; Saccharomycotina; Saccharomycetes; Saccharomycetales; mitosporic Saccharomycetales; Candida	Candida theae	1198502	JQ812707	NR_111722	ATCC:MYA-4746	ATCC MYA-4746			ex-type culture of Candida theae
1185	Sung-Oui Suh	Candida tritomae	complete ITS1_5.8S_ITS2	Yes	Eukaryota; Fungi; Dikarya; Ascomycota; Saccharomycotina; Saccharomycetes; Saccharomycetales; mitosporic Saccharomycetales; Candida	Candida tritomae	348312	FJ623616	NR_111399	ATCC:MYA-4348	ATCC MYA-4348			ex-type culture of Candida tritomae
1186	Sung-Oui Suh	Candida wounanorum	complete ITS1_5.8S_ITS2	Yes	Eukaryota; Fungi; Dikarya; Ascomycota; Saccharomycotina; Saccharomycetes; Saccharomycetales; mitosporic Saccharomycetales; Candida	Candida wounanorum	246083	FJ623597	NR_111380	ATCC:MYA-4312	ATCC MYA-4312			ex-type culture of Candida wounanorum
1187	Sung-Oui Suh	Candida xyloterini	complete ITS1_5.8S_ITS2	Yes	Eukaryota; Fungi; Dikarya; Ascomycota; Saccharomycotina; Saccharomycetes; Saccharomycetales; mitosporic Saccharomycetales; Candida	Candida xyloterini	641392	FJ381696	NR_111361	ATCC:62898	ATCC 62898			ex-type culture of Candida xyloterini
1188	Sung-Oui Suh	Coniolariella hispanica	complete ITS1_5.8S_ITS2	Yes	Eukaryota; Fungi; Dikarya; Ascomycota; Pezizomycotina; Sordariomycetes; Xylariomycetidae; Xylariales; Xylariaceae; Coniolariella	Coniolariella hispanica	561987	FJ172294	NR_111347	ATCC:MYA-4453	ATCC MYA-4453			ex-type culture of Coniolariella hispanica
1189	Sung-Oui Suh	Cryomyces antarcticus	only 5.8S_ITS2 complete, ITS1 partial	Yes	Eukaryota; Fungi; Dikarya; Ascomycota; Pezizomycotina; Dothideomycetes; Cryomyces	Cryomyces antarcticus	329879	JQ906770	NR_111726	ATCC:MYA-4880	ATCC MYA-4880			ex-type culture of Cryomyces antarcticus
1190	Sung-Oui Suh	Debaryomyces renaii	complete ITS1_5.8S_ITS2	Yes	Eukaryota; Fungi; Dikarya; Ascomycota; Saccharomycotina; Saccharomycetes; Saccharomycetales; Debaryomycetaceae; Debaryomyces	Debaryomyces renaii	1072104	HQ999977	NR_111609	ATCC:MYA-4749	ATCC MYA-4749			ex-type culture of Debaryomyces renaii
1191	Sung-Oui Suh	Diatrypasimilis australiensis	complete ITS1_5.8S_ITS2	Yes	Eukaryota; Fungi; Dikarya; Ascomycota; Pezizomycotina; Sordariomycetes; Xylariomycetidae; Xylariales; Xylariales incertae sedis; Diatrypasimilis	Diatrypasimilis australiensis	646464	FJ430590	NR_111369	ATCC:MYA-3540	ATCC MYA-3540			ex-type culture of Diatrypasimilis australiensis
1192	Sung-Oui Suh	Pseudogymnoascus destructans	only 5.8S_ITS2 complete, ITS1 partial	Yes	Eukaryota; Fungi; Dikarya; Ascomycota; Pezizomycotina; Leotiomycetes; Leotiomycetes incertae sedis; Pseudeurotiaceae; Pseudogymnoascus	Pseudogymnoascus destructans	655981	KC171349	NR_111838	ATCC:MYA-4855	ATCC MYA-4855			ex-type culture of Geomyces destructans
1193	Sung-Oui Suh	Geotrichum cucujoidarum	complete ITS1_5.8S_ITS2	Yes	Eukaryota; Fungi; Dikarya; Ascomycota; Saccharomycotina; Saccharomycetes; Saccharomycetales; Dipodascaceae; mitosporic Dipodascaceae; Geotrichum	Geotrichum cucujoidarum	345175	FJ196774	NR_111352	ATCC:MYA-4341	ATCC MYA-4341			ex-type culture of Geotrichum cucujoidarum
1194	Sung-Oui Suh	Geotrichum histeridarum	complete ITS1_5.8S_ITS2	Yes	Eukaryota; Fungi; Dikarya; Ascomycota; Saccharomycotina; Saccharomycetes; Saccharomycetales; Dipodascaceae; mitosporic Dipodascaceae; Geotrichum	Geotrichum histeridarum	329873	FJ196773	NR_111351	ATCC:MYA-4340	ATCC MYA-4340			ex-type culture of Geotrichum histeridarum
1195	Sung-Oui Suh	Kazachstania hellenica	only 5.8S complete;ITS1&2 partial	Yes	Eukaryota; Fungi; Dikarya; Ascomycota; Saccharomycotina; Saccharomycetes; Saccharomycetales; Saccharomycetaceae; Kazachstania	Kazachstania hellenica	473794	FJ810522	NR_111415	ATCC:MYA-4559	ATCC MYA-4559			ex-type culture of Kazachstania hellenica
1196	Sung-Oui Suh	Kazachstania siamensis	complete ITS1_5.8S_ITS2	Yes	Eukaryota; Fungi; Dikarya; Ascomycota; Saccharomycotina; Saccharomycetes; Saccharomycetales; Saccharomycetaceae; Kazachstania	Kazachstania siamensis	382647	FJ196781	NR_111356	ATCC:MYA-4466	ATCC MYA-4466			ex-type culture of Kazachstania siamensis
1197	Sung-Oui Suh	Kazachstania wufongensis	complete ITS1_5.8S_ITS2	Yes	Eukaryota; Fungi; Dikarya; Ascomycota; Saccharomycotina; Saccharomycetes; Saccharomycetales; Saccharomycetaceae; Kazachstania	Kazachstania wufongensis	561021	HQ999975	NR_111607	ATCC:MYA-4747	ATCC MYA-4747			ex-type culture of Kazachstania wufongensis
1198	Sung-Oui Suh	Lachancea dasiensis	complete ITS1_5.8S_ITS2	Yes	Eukaryota; Fungi; Dikarya; Ascomycota; Saccharomycotina; Saccharomycetes; Saccharomycetales; Saccharomycetaceae; Lachancea	Lachancea dasiensis	1072105	HQ999976	NR_111608	ATCC:MYA-4748	ATCC MYA-4748			ex-type culture of Lachancea dasiensis
1199	Sung-Oui Suh	Malassezia globosa	only 5.8S complete, ITS1&2 partial	Yes	Eukaryota; Fungi; Dikarya; Basidiomycota; Ustilaginomycotina; Exobasidiomycetes; Malasseziales; Malasseziaceae; Malassezia	Malassezia globosa	76773	GU291271	NR_111475	ATCC:MYA-4612	ATCC MYA-4612			ex-type culture of Malassezia globosa
1200	Sung-Oui Suh	Malassezia obtusa	only 5.8S complete, ITS1&2 partial	Yes	Eukaryota; Fungi; Dikarya; Basidiomycota; Ustilaginomycotina; Exobasidiomycetes; Malasseziales; Malasseziaceae; Malassezia	Malassezia obtusa	76774	GU291269	NR_111474	ATCC:MYA-4610	ATCC MYA-4610			ex-type culture of Malassezia obtusa
1201	Sung-Oui Suh	Metschnikowia chrysoperlae	complete ITS1_5.8S_ITS2	Yes	Eukaryota; Fungi; Dikarya; Ascomycota; Saccharomycotina; Saccharomycetes; Saccharomycetales; Metschnikowiaceae; Metschnikowia	Metschnikowia chrysoperlae	261276	FJ623593	NR_111376	ATCC:MYA-4304	ATCC MYA-4304			ex-type culture of Metschnikowia chrysoperlae
1202	Sung-Oui Suh	Microbotryozyma collariae	complete ITS1_5.8S_ITS2	Yes	Eukaryota; Fungi; Dikarya; Basidiomycota; Pucciniomycotina; Microbotryomycetes; Microbotryales; Ustilentylomataceae; Microbotryozyma	Microbotryozyma collariae	1111079	JN849458	NR_111681	ATCC:MYA-4666	ATCC MYA-4666			ex-type culture of Microbotryozyma collariae
1203	Sung-Oui Suh	Monosporascus cannonballus	only 5.8S_ITS2 complete, ITS1 partial	Yes	Eukaryota; Fungi; Dikarya; Ascomycota; Pezizomycotina; Sordariomycetes; Sordariomycetidae; Sordariales; Sordariales incertae sedis; Monosporascus	Monosporascus cannonballus	155416	FJ430598	NR_111370	ATCC:26931	ATCC 26931			ex-type culture of Monosporascus cannonballus
1204	Sung-Oui Suh	Mucor ellipsoideus	complete ITS1_5.8S_ITS2		Eukaryota; Fungi; Fungi incertae sedis; Early diverging fungal lineages; Mucoromycotina; Mucorales; Mucorineae; Mucoraceae; Mucor	Mucor ellipsoideus	708160	JN882308	NR_111683	ATCC:MYA-4767	ATCC MYA-4767			ex-type culture of Mucor ellipsoideus
1205	Sung-Oui Suh	Mucor velutinosus	only 5.8S complete, ITS1&2 partial	Yes	Eukaryota; Fungi; Fungi incertae sedis; Early diverging fungal lineages; Mucoromycotina; Mucorales; Mucorineae; Mucoraceae; Mucor	Mucor velutinosus	708070	JN882307	NR_111682	ATCC:MYA-4766	ATCC MYA-4766			ex-type culture of Mucor velutinosus
1206	Sung-Oui Suh	Nemania abortiva	complete ITS1_5.8S_ITS2		Eukaryota; Fungi; Dikarya; Ascomycota; Pezizomycotina; Sordariomycetes; Xylariomycetidae; Xylariales; Xylariaceae; Nemania	Nemania abortiva	561989	FJ172270		ATCC:MYA-4108	ATCC MYA-4108			ex-type culture of Nemania abortiva
1207	Sung-Oui Suh	Ogataea chonburiensis	complete ITS1_5.8S_ITS2	Yes	Eukaryota; Fungi; Dikarya; Ascomycota; Saccharomycotina; Saccharomycetes; Saccharomycetales; Saccharomycetales incertae sedis; Ogataea	Ogataea chonburiensis	447320	FJ914924	NR_111419	ATCC:MYA-4462	ATCC MYA-4462			ex-type culture of Ogataea chonburiensis
1208	Sung-Oui Suh	Ogataea nakhonphanomensis	complete ITS1_5.8S_ITS2	Yes	Eukaryota; Fungi; Dikarya; Ascomycota; Saccharomycotina; Saccharomycetes; Saccharomycetales; Saccharomycetales incertae sedis; Ogataea	Ogataea nakhonphanomensis	447321	FJ914925	NR_111420	ATCC:MYA-4463	ATCC MYA-4463			ex-type culture of Ogataea nakhonphanomensis
1209	Sung-Oui Suh	Ogataea polymorpha	complete ITS1_5.8S_ITS2	Yes	Eukaryota; Fungi; Dikarya; Ascomycota; Saccharomycotina; Saccharomycetes; Saccharomycetales; Saccharomycetales incertae sedis; Ogataea	Ogataea polymorpha	460523	FJ914915	NR_111418	ATCC:34438	ATCC 34438			ex-type culture of Ogataea polymorpha
1210	Sung-Oui Suh	Ogataea siamensis	complete ITS1_5.8S_ITS2	Yes	Eukaryota; Fungi; Dikarya; Ascomycota; Saccharomycotina; Saccharomycetes; Saccharomycetales; Saccharomycetales incertae sedis; Ogataea	Ogataea siamensis	246385	FJ914926	NR_111421	ATCC:MYA-4464	ATCC MYA-4464			ex-type culture of Ogataea siamensis
1211	Sung-Oui Suh	Ogataea thermomethanolica	complete ITS1_5.8S_ITS2	Yes	Eukaryota; Fungi; Dikarya; Ascomycota; Saccharomycotina; Saccharomycetes; Saccharomycetales; Saccharomycetales incertae sedis; Ogataea	Ogataea thermomethanolica	310468	FJ914927	NR_111422	ATCC:MYA-4465	ATCC MYA-4465			ex-type culture of Ogataea thermomethanolica
1212	Sung-Oui Suh	Rhizomucor pusillus	only 5.8S_ITS2 complete, ITS1 partial	Yes	Eukaryota; Fungi; Fungi incertae sedis; Early diverging fungal lineages; Mucoromycotina; Mucorales; Lichtheimiaceae; Rhizomucor	Rhizomucor pusillus	4840	GU256738	NR_111462	ATCC:46342	ATCC 46342			ex-type culture of Rhizomucor pusillus
1213	Sung-Oui Suh	Rhodotorula bloemfonteinensis	complete ITS1_5.8S_ITS2		Eukaryota; Fungi; Dikarya; Basidiomycota; Pucciniomycotina; Agaricostilbomycetes; Agaricostilbomycetes incertae sedis; mitosporic Agaricostilbomycetidae; Rhodotorula	Rhodotorula bloemfonteinensis	1123531	JN882336	NR_111686	ATCC:MYA-4817	ATCC MYA-4817			ex-type culture of Rhodotorula bloemfonteinensis
1214	Sung-Oui Suh	Rhodotorula eucalyptica	complete ITS1_5.8S_ITS2		Eukaryota; Fungi; Dikarya; Basidiomycota; Pucciniomycotina; Agaricostilbomycetes; Agaricostilbomycetes incertae sedis; mitosporic Agaricostilbomycetidae; Rhodotorula	Rhodotorula eucalyptica	1123532	JN882334	NR_111685	ATCC:MYA-4815	ATCC MYA-4815			ex-type culture of Rhodotorula eucalyptica
1215	Sung-Oui Suh	Rhodotorula pini	complete ITS1_5.8S_ITS2		Eukaryota; Fungi; Dikarya; Basidiomycota; Pucciniomycotina; Agaricostilbomycetes; Agaricostilbomycetes incertae sedis; mitosporic Agaricostilbomycetidae; Rhodotorula	Rhodotorula pini	1123533	JN882335		ATCC:MYA-4816	ATCC MYA-4816			ex-type culture of Rhodotorula pini
1216	Sung-Oui Suh	Saccharomyces kudriavzevii	complete ITS1_5.8S_ITS2	Yes	Eukaryota; Fungi; Dikarya; Ascomycota; Saccharomycotina; Saccharomycetes; Saccharomycetales; Saccharomycetaceae; Saccharomyces	Saccharomyces kudriavzevii	114524	FJ196779	NR_111355	ATCC:MYA-4449	ATCC MYA-4449			ex-type culture of Saccharomyces kudriavzevii
1217	Sung-Oui Suh	Saccharomyces mikatae	complete ITS1_5.8S_ITS2	Yes	Eukaryota; Fungi; Dikarya; Ascomycota; Saccharomycotina; Saccharomycetes; Saccharomycetales; Saccharomycetaceae; Saccharomyces	Saccharomyces mikatae	114525	FJ196778	NR_111354	ATCC:MYA-4448	ATCC MYA-4448			ex-type culture of Saccharomyces mikatae
1218	Sung-Oui Suh	Spathaspora arborariae	complete ITS1_5.8S_ITS2	Yes	Eukaryota; Fungi; Dikarya; Ascomycota; Saccharomycotina; Saccharomycetes; Saccharomycetales; Debaryomycetaceae; Spathaspora	Spathaspora arborariae	979894	HQ876041	NR_111592	ATCC:MYA-4684	ATCC MYA-4684			ex-type culture of Spathaspora arborariae
1219	Sung-Oui Suh	Trichoderma cerinum	only 5.8S_ITS2 complete, ITS1 partial	Yes	Eukaryota; Fungi; Dikarya; Ascomycota; Pezizomycotina; Sordariomycetes; Hypocreomycetidae; Hypocreales; Hypocreaceae; Trichoderma	Trichoderma cerinum	202912	KC171336	NR_111835	ATCC:MYA-4840	ATCC MYA-4840			ex-type culture of Trichoderma cerinum
1220	Sung-Oui Suh	Trichoderma erinaceum	only 5.8S_ITS2 complete, ITS1 partial	Yes	Eukaryota; Fungi; Dikarya; Ascomycota; Pezizomycotina; Sordariomycetes; Hypocreomycetidae; Hypocreales; Hypocreaceae; Trichoderma	Trichoderma erinaceum	202914	KC171340	NR_111837	ATCC:MYA-4844	ATCC MYA-4844			ex-type culture of Trichoderma erinaceum
1221	Sung-Oui Suh	Trichoderma rossicum	only 5.8S complete, ITS1&2 partial	Yes	Eukaryota; Fungi; Dikarya; Ascomycota; Pezizomycotina; Sordariomycetes; Hypocreomycetidae; Hypocreales; Hypocreaceae; Trichoderma	Trichoderma rossicum	202916	KC171335	NR_111834	ATCC:MYA-4839	ATCC MYA-4839			ex-type culture of Trichoderma rossicum
1222	Sung-Oui Suh	Trichoderma velutinum	only 5.8S_ITS2 complete, ITS1 partial	Yes	Eukaryota; Fungi; Dikarya; Ascomycota; Pezizomycotina; Sordariomycetes; Hypocreomycetidae; Hypocreales; Hypocreaceae; Trichoderma	Trichoderma velutinum	202918	KC171337	NR_111836	ATCC:MYA-4841	ATCC MYA-4841			ex-type culture of Trichoderma velutinum
1223	Sung-Oui Suh	Trichosporon insectorum	complete ITS1_5.8S_ITS2	Yes	Eukaryota; Fungi; Dikarya; Basidiomycota; Agaricomycotina; Tremellomycetes; Tremellales; mitosporic Tremellales; Trichosporon	Trichosporon insectorum	565289	FJ196776	NR_111353	ATCC:MYA-4361	ATCC MYA-4361			ex-type culture of Trichosporon insectorum
1224	Sung-Oui Suh	Trichosporon xylopini	complete ITS1_5.8S_ITS2	Yes	Eukaryota; Fungi; Dikarya; Basidiomycota; Agaricomycotina; Tremellomycetes; Tremellales; mitosporic Tremellales; Trichosporon	Trichosporon xylopini	1072107	HQ005752	NR_111547	ATCC:MYA-4670	ATCC MYA-4670			ex-type culture of Trichosporon xylopini
1225	Sung-Oui Suh	Xylotumulus gibbisporus	complete ITS1_5.8S_ITS2		Eukaryota; Fungi; Dikarya; Ascomycota; Pezizomycotina; Sordariomycetes; Xylariomycetidae; Xylariales; Xylariaceae; Xylotumulus	Xylotumulus gibbisporus	561973	FJ172271		ATCC:MYA-4109	ATCC MYA-4109			ex-type culture of Xylotumulus gibbisporus
1226		Ochroconis lascauxensis	only 5.8S_ITS2 complete, ITS1 partial	Yes	Eukaryota; Fungi; Dikarya; Ascomycota; Pezizomycotina; Dothideomycetes; Dothideomycetes incertae sedis; Venturiales; Sympoventuriaceae; Ochroconis	Ochroconis lascauxensis	994323	FR832474		CBS:131815;CMF:ISB 1862	LX A1			ex-holotype culture of Ochroconis lascauxensis
1227		Ochroconis anellii	only 5.8S_ITS2 complete, ITS1 partial	Yes	Eukaryota; Fungi; Dikarya; Ascomycota; Pezizomycotina; Dothideomycetes; Dothideomycetes incertae sedis; Venturiales; Sympoventuriaceae; Ochroconis	Ochroconis anellii	994324	FR832477	NR_111436	CBS:284.64	CBS 284.64			ex-type culture of Scolecobasidium anellii
1228		Trichoderma amazonicum	complete ITS1_5.8S_ITS2	Yes	Eukaryota; Fungi; Dikarya; Ascomycota; Pezizomycotina; Sordariomycetes; Hypocreomycetidae; Hypocreales; Hypocreaceae; Trichoderma	Trichoderma amazonicum	860960	HM142358	NR_111529	CBS:126898	IB50			ex-type culture of Trichoderma amazonicum
1229	Steven Leavitt	Rhizoplaca shushanii	complete ITS1_5.8S_ITS2	Yes	Eukaryota; Fungi; Dikarya; Ascomycota; Pezizomycotina; Lecanoromycetes; Lecanoromycetidae; Lecanorales; Lecanorineae; Lecanoraceae; Rhizoplaca	Rhizoplaca shushanii	1339058	HM577282					BRY:C55061	holotype culture of Rhizoplaca shushanii
1230	Steven Leavitt	Rhizoplaca occulta	complete ITS1_5.8S_ITS2	Yes	Eukaryota; Fungi; Dikarya; Ascomycota; Pezizomycotina; Lecanoromycetes; Lecanoromycetidae; Lecanorales; Lecanorineae; Lecanoraceae; Rhizoplaca	Rhizoplaca occulta	1339059	HM577307					BRY:C55076	holotype culture of Rhizoplaca occulta
1231	Steven Leavitt	Rhizoplaca parilis	complete ITS1_5.8S_ITS2	Yes	Eukaryota; Fungi; Dikarya; Ascomycota; Pezizomycotina; Lecanoromycetes; Lecanoromycetidae; Lecanorales; Lecanorineae; Lecanoraceae; Rhizoplaca	Rhizoplaca parilis	1339060	HM577308					BRY:C55077	holotype culture of Rhizoplaca parilis
1232	Steven Leavitt	Rhizoplaca polymorpha	complete ITS1_5.8S_ITS2	Yes	Eukaryota; Fungi; Dikarya; Ascomycota; Pezizomycotina; Lecanoromycetes; Lecanoromycetidae; Lecanorales; Lecanorineae; Lecanoraceae; Rhizoplaca	Rhizoplaca polymorpha	1339061	HM577324					BRY:C55093	holotype culture of Rhizoplaca polymorpha
1233	Steven Leavitt	Rhizoplaca porterii	complete ITS1_5.8S_ITS2	Yes	Eukaryota; Fungi; Dikarya; Ascomycota; Pezizomycotina; Lecanoromycetes; Lecanoromycetidae; Lecanorales; Lecanorineae; Lecanoraceae; Rhizoplaca	Rhizoplaca porterii	1339062	HM577327					BRY:C55096	holotype culture of Rhizoplaca porterii
1235	María P. Martín et al.	Terfezia alsheikhii	complete ITS1_5.8S_ITS2		Eukaryota; Fungi; Dikarya; Ascomycota; Pezizomycotina; Pezizomycetes; Pezizales; Pezizaceae; Terfezia	Terfezia alsheikhii	986321	HQ698100					MA:Fungi:32251	holotype of Terfezia alsheikhii
1236	María P. Martín et al.	Lecanora kenyana	complete ITS1_5.8S_ITS2	Yes	Eukaryota; Fungi; Dikarya; Ascomycota; Pezizomycotina; Lecanoromycetes; Lecanoromycetidae; Lecanorales; Lecanorineae; Lecanoraceae; Lecanora	Lecanora kenyana	1202334	JQ900618			1179E		F:Kirika 1179	isotype culture of Lecanora kenyana
1237	María P. Martín et al.	Lecanora orientoafricana	complete ITS1_5.8S_ITS2	Yes	Eukaryota; Fungi; Dikarya; Ascomycota; Pezizomycotina; Lecanoromycetes; Lecanoromycetidae; Lecanorales; Lecanorineae; Lecanoraceae; Lecanora	Lecanora orientoafricana	1202333	JQ900619			2205E		F:Kirika 2205	isotype of Lecanora orientoafricana
1241	María P. Martín et al.	Gymnomyces pila	only 5.8S complete, ITS1&2 partial	Yes	Eukaryota; Fungi; Dikarya; Basidiomycota; Agaricomycotina; Agaricomycetes; Russulales; Russulaceae; Martellia	Martellia pila	132182	AF230893					MA:Fungi:30667	isotype of Martellia mediterranea
1242	María P. Martín et al.	Zelleromyces giennensis	only 5.8S complete, ITS1&2 partial	Yes	Eukaryota; Fungi; Dikarya; Basidiomycota; Agaricomycotina; Agaricomycetes; Russulales; Russulaceae; Zelleromyces	Zelleromyces giennensis	131544	AF230900					MA:Fungi:38674	holotype of Zelleromyces giennensis
1243	María P. Martín et al.	Zelleromyces hispanicus	only 5.8S complete, ITS1&2 partial		Eukaryota; Fungi; Dikarya; Basidiomycota; Agaricomycotina; Agaricomycetes; Russulales; Russulaceae; Zelleromyces	Zelleromyces hispanicus	131570	AF231912					MA:Fungi:37498	holotype of Zelleromyces hispanicus
1244	María P. Martín et al.	Rhizopogon subpurpurascens	only 5.8S complete, ITS1&2 partial		Eukaryota; Fungi; Dikarya; Basidiomycota; Agaricomycotina; Agaricomycetes; Agaricomycetidae; Boletales; Suillineae; Rhizopogonaceae; Rhizopogon	Rhizopogon subpurpurascens	87129	AF377133			AHS65398		MICH:5504	holotype of Rhizopogon subpurpurascens
1246	María P. Martín et al.	Rhizopogon buenoi	only 5.8S complete, ITS1&2 partial		Eukaryota; Fungi; Dikarya; Basidiomycota; Agaricomycotina; Agaricomycetes; Agaricomycetidae; Boletales; Suillineae; Rhizopogonaceae; Rhizopogon	Rhizopogon buenoi	146677	AJ297263					MA:Fungi:47676	holotype of Rhizopogon buenoi
1247	María P. Martín et al.	Astraeus asiaticus	only 5.8S complete, ITS1&2 partial		Eukaryota; Fungi; Dikarya; Basidiomycota; Agaricomycotina; Agaricomycetes; Agaricomycetidae; Boletales; Sclerodermatineae; Astraeaceae; Astraeus	Astraeus asiaticus	554049	AJ629396			ASTRAE-56		E:Wat28787	holotype of Astraeus asiaticus
1248	María P. Martín et al.	Leptosphaeria polylepidis	only 5.8S complete, ITS1&2 partial	Yes	Eukaryota; Fungi; Dikarya; Ascomycota; Pezizomycotina; Dothideomycetes; Pleosporomycetidae; Pleosporales; Pleosporineae; Leptosphaeriaceae; Leptosphaeria	Leptosphaeria polylepidis	420148	AJ786644					MA:Fungi:57843	holotype of Leptosphaeria polylepidis
1249	Thorsten Lumbsch	Biatora britannica	only 5.8S complete, ITS1&2 partial		Eukaryota; Fungi; Dikarya; Ascomycota; Pezizomycotina; Lecanoromycetes; Lecanoromycetidae; Lecanorales; Lecanorineae; Ramalinaceae; Biatora	Biatora britannica	158975	AY032897		EDIT: Fix specimen number see http://plants.jstor.org/specimen/nmw0000801?s=t			NMW<GBR>:A. Orange 11003	holotype culture of Biatora britannica
1250	María P. Martín et al., Jean-Marc Moncalvo	Resupinatus porosus	only 5.8S_ITS2 complete, ITS1 partial	Yes	Eukaryota; Fungi; Dikarya; Basidiomycota; Agaricomycotina; Agaricomycetes; Agaricomycetidae; Agaricales; Tricholomataceae; Resupinatus	Resupinatus porosus	328503	DQ017063			PR5832		CFMR:PR-5832	paratype of Resupinatus porosus	1
1251	María P. Martín et al.	Peniophorella praetermissa	only 5.8S complete, ITS1&2 partial		Eukaryota; Fungi; Dikarya; Basidiomycota; Agaricomycotina; Agaricomycetes; Corticiales; Corticiaceae; Peniophorella	Peniophorella praetermissa	89803	DQ647444		FCUG:1708	FCUG 1708		GB:NH9536	ex-epitype culture of Peniophorella praetermissa
1252	María P. Martín et al.	Peniophorella pertenuis	only 5.8S complete, ITS1&2 partial		Eukaryota; Fungi; Dikarya; Basidiomycota; Agaricomycotina; Agaricomycetes; Corticiales; Corticiaceae; Peniophorella	Peniophorella pertenuis	814925	DQ647482		FCUG:2430	FCUG 2430		GB:NH12146	ex-epitype culture of Peniophorella pertenuis
1253	María P. Martín et al.	Peniophorella subpraetermissa	only 5.8S complete, ITS1&2 partial		Eukaryota; Fungi; Dikarya; Basidiomycota; Agaricomycotina; Agaricomycetes; Corticiales; Corticiaceae; Peniophorella	Peniophorella subpraetermissa	391081	DQ647493			Wu 950627		TNM:Wu 950627	holotype of Peniophorella subpraetermissa
1254	María P. Martín et al.	Peniophorella odontiiformis	only 5.8S complete, ITS1&2 partial		Eukaryota; Fungi; Dikarya; Basidiomycota; Agaricomycotina; Agaricomycetes; Corticiales; Corticiaceae; Peniophorella	Peniophorella odontiiformis	391082	DQ647498		MUCL:32673	MUCL 32673		LY:3562	ex-holotype culture of Peniophorella odontiaeformis
1255		Ochroconis tshawytschae	only ITS1_5.8S complete, ITS2 partial	Yes	Eukaryota; Fungi; Dikarya; Ascomycota; Pezizomycotina; Dothideomycetes; Dothideomycetes incertae sedis; Venturiales; Sympoventuriaceae; Ochroconis	Ochroconis tshawytschae	262132	FR832476	NR_111435	CBS:100438	CBS 100438			ex-type culture of Ochroconis tshawytschae
1257		Ochroconis humicola	only 5.8S complete, ITS1&2 partial		Eukaryota; Fungi; Dikarya; Ascomycota; Pezizomycotina; Dothideomycetes; Dothideomycetes incertae sedis; Venturiales; Sympoventuriaceae; Ochroconis	Ochroconis humicola	228895	FR832479	NR_111437	CBS:116655	CBS 116655			ex-type culture of Scolecobasidium humicola
1258		Lichtheimia ramosa	only 5.8S complete, ITS1&2 partial	Yes	Eukaryota; Fungi; Fungi incertae sedis; Early diverging fungal lineages; Mucoromycotina; Mucorales; Lichtheimiaceae; Lichtheimia	Lichtheimia ramosa	688394	GQ342874	NR_111438	CBS:582.65				ex-neotype culture of Mucor ramosus
1260		Lichtheimia ornata	only 5.8S complete, ITS1&2 partial	Yes	Eukaryota; Fungi; Fungi incertae sedis; Early diverging fungal lineages; Mucoromycotina; Mucorales; Lichtheimiaceae; Lichtheimia	Lichtheimia ornata	688661	GQ342891	NR_111439	CBS:291.66				ex-type culture of Absidia ornata	4
1261		Lichtheimia hyalospora	only 5.8S complete, ITS1&2 partial	Yes	Eukaryota; Fungi; Fungi incertae sedis; Early diverging fungal lineages; Mucoromycotina; Mucorales; Lichtheimiaceae; Lichtheimia	Lichtheimia hyalospora	420593	GQ342893	NR_111440	CBS:173.67				ex-neotype culture of Tieghemella hyalospora
1262		Lichtheimia sphaerocystis	only 5.8S complete, ITS1&2 partial	Yes	Eukaryota; Fungi; Fungi incertae sedis; Early diverging fungal lineages; Mucoromycotina; Mucorales; Lichtheimiaceae; Lichtheimia	Lichtheimia sphaerocystis	688662	GQ342900	NR_111441	CBS:420.70				ex-type culture of Lichtheimia sphaerocystis
1263		Physcia austrostellaris	only 5.8S complete, ITS1&2 partial		Eukaryota; Fungi; Dikarya; Ascomycota; Pezizomycotina; Lecanoromycetes; Lecanoromycetidae; Caliciales; Physciaceae; Physcia	Physcia austrostellaris	630229	GU074409					CANB:Elix 38829	holotype of Physcia austrostellaris
1264	María P. Martín et al.	Penicillium hetheringtonii	only 5.8S_ITS2 complete, ITS1 partial		Eukaryota; Fungi; Dikarya; Ascomycota; Pezizomycotina; Eurotiomycetes; Eurotiomycetidae; Eurotiales; Aspergillaceae; Penicillium	Penicillium hetheringtonii	911720	GU944558	NR_111482	CBS:122392	CBS 122392			ex-holotype culture of Penicillium hetheringtonii
1265	María P. Martín et al.	Penicillium tropicoides	only 5.8S_ITS2 complete, ITS1 partial		Eukaryota; Fungi; Dikarya; Ascomycota; Pezizomycotina; Eurotiomycetes; Eurotiomycetidae; Eurotiales; Aspergillaceae; Penicillium	Penicillium tropicoides	911722	GU944584	NR_111486	CBS:122410	CBS 122410			ex-holotype culture of Penicillium tropicoides
1266		Ochroconis anomala	only 5.8S complete, ITS1&2 partial		Eukaryota; Fungi; Dikarya; Ascomycota; Pezizomycotina; Dothideomycetes; Dothideomycetes incertae sedis; Venturiales; Sympoventuriaceae; Ochroconis	Ochroconis anomala	1070149	HE575201		ISBC:CMF:1866	LX CH40;CMFISB:1866			ex-holotype culture of Ochroconis anomala
1267		Diaporthe kochmanii	only 5.8S_ITS2 complete, ITS1 partial	CATTG	Eukaryota; Fungi; Dikarya; Ascomycota; Pezizomycotina; Sordariomycetes; Sordariomycetidae; Diaporthales; Diaporthaceae; Diaporthe	Diaporthe kochmanii	1116855	JF431295	NR_111614	BRIP:54033	T12504A			ex-holotype culture of Diaporthe kochmanii
1268		Diaporthe gulyae	only 5.8S_ITS2 complete, ITS1 partial	CATTG	Eukaryota; Fungi; Dikarya; Ascomycota; Pezizomycotina; Sordariomycetes; Sordariomycetidae; Diaporthales; Diaporthaceae; Diaporthe	Diaporthe gulyae	1116854	JF431299	NR_111615	BRIP:54025	T12505G			ex-holotype culture of Diaporthe gulyae
1269		Diaporthe kongii	only 5.8S_ITS2 complete, ITS1 partial	CATTG	Eukaryota; Fungi; Dikarya; Ascomycota; Pezizomycotina; Sordariomycetes; Sordariomycetidae; Diaporthales; Diaporthaceae; Diaporthe	Diaporthe kongii	1116856	JF431301	NR_111616	BRIP:54031	T12509H			ex-holotype culture of Diaporthe kongii
1270		Basidioascus undulatus	only 5.8S complete, ITS1&2 partial		Eukaryota; Fungi; Dikarya; Basidiomycota; Basidiomycota incertae sedis; Wallemiomycetes; Geminibasidiales; Basidioascus	Basidioascus undulatus	1230402	JX242863	NR_111775	DAOM:241956	DAOM 241956			ex-epitype culture of Basidioascus undulatus
1271		Geminibasidium donsium	only 5.8S complete, ITS1&2 partial	Yes	Eukaryota; Fungi; Dikarya; Basidiomycota; Basidiomycota incertae sedis; Wallemiomycetes; Geminibasidiales; Geminibasidium	Geminibasidium donsium	1339698	JX242877	NR_111777	DAOM:241966	DAOM 241966			ex-holotype culture of Geminibasidium donsium
1272		Basidioascus magus	only 5.8S complete, ITS1&2 partial		Eukaryota; Fungi; Dikarya; Basidiomycota; Basidiomycota incertae sedis; Wallemiomycetes; Geminibasidiales; Basidioascus	Basidioascus magus	1230398	JX242869	NR_111776	DAOM:241948	DAOM 241948			ex-holotype culture of Basidioascus magus
1273		Geminibasidium hirsutum	only 5.8S complete, ITS1&2 partial		Eukaryota; Fungi; Dikarya; Basidiomycota; Basidiomycota incertae sedis; Wallemiomycetes; Geminibasidiales; Geminibasidium	Geminibasidium hirsutum	1230396	JX242880	NR_111778	DAOM:241969	DAOM 241969			ex-holotype culture of Geminibasidium hirsutum
1274	Steven Leavitt	Rhizoplaca melanophthalma	only 5.8S complete, ITS1&2 partial		Eukaryota; Fungi; Dikarya; Ascomycota; Pezizomycotina; Lecanoromycetes; Lecanoromycetidae; Lecanorales; Lecanorineae; Lecanoraceae; Rhizoplaca	Rhizoplaca melanophthalma	112044	JX948232					MAF:Lich:16805	epitype of Rhizoplaca melanophthalma
1275		Trichosporon veenhuisii	complete ITS1_5.8S_ITS2	Yes	Eukaryota; Fungi; Dikarya; Basidiomycota; Agaricomycotina; Tremellomycetes; Tremellales; mitosporic Tremellales; Trichosporon	Trichosporon veenhuisii	105713	AF414693	NR_073208	CBS:7136	CBS 7136			ex-type culture of Trichosporon veenhuisii
1276		Trichosporon porosum	complete ITS1_5.8S_ITS2	Yes	Eukaryota; Fungi; Dikarya; Basidiomycota; Agaricomycotina; Tremellomycetes; Tremellales; mitosporic Tremellales; Trichosporon	Trichosporon porosum	105984	AF414694	NR_073209	CBS:2040	CBS 2040			ex-type culture of Apiotrichum porosum
1277	Cathie Aime	Kwoniella heveanensis	complete ITS1_5.8S_ITS2	CAGTA	Eukaryota; Fungi; Dikarya; Basidiomycota; Agaricomycotina; Tremellomycetes; Tremellales; Tremellales incertae sedis; Kwoniella	Kwoniella heveanensis	89924	AF444301	NR_073210	CBS:569	CBS 569			ex-type culture of Torula heveanensis
1278		Cryptococcus skinneri	complete ITS1_5.8S_ITS2	Yes	Eukaryota; Fungi; Dikarya; Basidiomycota; Agaricomycotina; Tremellomycetes; Tremellales; mitosporic Tremellales; Cryptococcus	Cryptococcus skinneri	89928	AF444305	NR_073211	CBS:5029	CBS 5029			ex-type culture of Cryptococcus skinneri
1279		Cryptococcus terreus	complete ITS1_5.8S_ITS2	Yes	Eukaryota; Fungi; Dikarya; Basidiomycota; Agaricomycotina; Tremellomycetes; Filobasidiales; mitosporic Filobasidiales; Cryptococcus	Cryptococcus terreus	40409	AF444319	NR_073212	CBS:1895	CBS 1895			ex-type culture of Cryptococcus terreus
1280	UNITE/Michael Weiß	Cryptococcus podzolicus	complete ITS1_5.8S_ITS2	Yes	Eukaryota; Fungi; Dikarya; Basidiomycota; Agaricomycotina; Tremellomycetes; Tremellales; mitosporic Tremellales; Cryptococcus	Cryptococcus podzolicus	89927	AF444321	NR_073213	CBS:6819	CBS 6819			ex-type culture of Candida podzolica
1281		Cryptococcus huempii	complete ITS1_5.8S_ITS2	CACTA	Eukaryota; Fungi; Dikarya; Basidiomycota; Agaricomycotina; Tremellomycetes; Cystofilobasidiales; mitosporic Cystofilobasidiales; Cryptococcus	Cryptococcus huempii	104673	AF444322	NR_073214	CBS:8186	CBS 8186			ex-type culture of Candida huempii
1282		Hannaella luteola	complete ITS1_5.8S_ITS2	Yes	Eukaryota; Fungi; Dikarya; Basidiomycota; Agaricomycotina; Tremellomycetes; Tremellales; mitosporic Tremellales; Hannaella	Hannaella luteola	1198485	AF444323	NR_073215	CBS:943	CBS 943			ex-type culture of Torula luteola
1283		Trichosporon cutaneum	complete ITS1_5.8S_ITS2	Yes	Eukaryota; Fungi; Dikarya; Basidiomycota; Agaricomycotina; Tremellomycetes; Tremellales; mitosporic Tremellales; Trichosporon	Trichosporon cutaneum	5554	AF444325	NR_073216	CBS:2466	CBS 2466			ex-neotype culture of Oidium cutaneum
1284		Fellomyces penicillatus	complete ITS1_5.8S_ITS2	Yes	Eukaryota; Fungi; Dikarya; Basidiomycota; Agaricomycotina; Tremellomycetes; Tremellales; mitosporic Tremellales; Fellomyces	Fellomyces penicillatus	5610	AF444337	NR_073217	CBS:5492	CBS 5492			ex-type culture of Sterigmatomyces penicillatus
1285		Cryptococcus flavus	complete ITS1_5.8S_ITS2	Yes	Eukaryota; Fungi; Dikarya; Basidiomycota; Agaricomycotina; Tremellomycetes; Tremellales; mitosporic Tremellales; Cryptococcus	Cryptococcus flavus	5416	AF444338	NR_073218	CBS:331	CBS 331			ex-type culture of Torula flava
1286		Cryptococcus uzbekistanensis	complete ITS1_5.8S_ITS2	Yes	Eukaryota; Fungi; Dikarya; Basidiomycota; Agaricomycotina; Tremellomycetes; Filobasidiales; mitosporic Filobasidiales; Cryptococcus	Cryptococcus uzbekistanensis	104415	AF444339	NR_073219	CBS:8683	CBS 8683			ex-type culture of Cryptococcus uzbekistanensis
1287		Cryptococcus liquefaciens	complete ITS1_5.8S_ITS2	Yes	Eukaryota; Fungi; Dikarya; Basidiomycota; Agaricomycotina; Tremellomycetes; Filobasidiales; mitosporic Filobasidiales; Cryptococcus	Cryptococcus liquefaciens	104408	AF444345	NR_073220	CBS:968	CBS 968			ex-type culture of Torulopsis liquefaciens
1288		Cryptococcus terricola	complete ITS1_5.8S_ITS2	Yes	Eukaryota; Fungi; Dikarya; Basidiomycota; Agaricomycotina; Tremellomycetes; Filobasidiales; mitosporic Filobasidiales; Cryptococcus	Cryptococcus terricola	104414	AF444350	NR_073221	CBS:4517	CBS 4517			ex-type culture of syntype of Cryptococcus terricola
1289		Cryptococcus phenolicus	complete ITS1_5.8S_ITS2	Yes	Eukaryota; Fungi; Dikarya; Basidiomycota; Agaricomycotina; Tremellomycetes; Filobasidiales; mitosporic Filobasidiales; Cryptococcus	Cryptococcus phenolicus	104411	AF444351	NR_073222	CBS:8682	CBS 8682			ex-type culture of Cryptococcus phenolicus
1290		Cryptococcus chernovii	complete ITS1_5.8S_ITS2	Yes	Eukaryota; Fungi; Dikarya; Basidiomycota; Agaricomycotina; Tremellomycetes; Filobasidiales; mitosporic Filobasidiales; Cryptococcus	Cryptococcus chernovii	104404	AF444354	NR_073223	CBS:8679	CBS 8679			ex-type culture of Cryptococcus chernovii
1291		Cryptococcus cylindricus	complete ITS1_5.8S_ITS2	Yes	Eukaryota; Fungi; Dikarya; Basidiomycota; Agaricomycotina; Tremellomycetes; Filobasidiales; mitosporic Filobasidiales; Cryptococcus	Cryptococcus cylindricus	104406	AF444360	NR_073224	CBS:8680	CBS 8680			ex-type culture of Cryptococcus cylindricus
1292		Cryptococcus arrabidensis	complete ITS1_5.8S_ITS2	Yes	Eukaryota; Fungi; Dikarya; Basidiomycota; Agaricomycotina; Tremellomycetes; Filobasidiales; mitosporic Filobasidiales; Cryptococcus	Cryptococcus arrabidensis	104403	AF444362	NR_073225	CBS:8678	CBS 8678			ex-type culture of Cryptococcus arrabidensis
1293		Cryptococcus saitoi	complete ITS1_5.8S_ITS2	Yes	Eukaryota; Fungi; Dikarya; Basidiomycota; Agaricomycotina; Tremellomycetes; Filobasidiales; mitosporic Filobasidiales; Cryptococcus	Cryptococcus saitoi	104412	AF444372	NR_073226	CBS:1975	CBS 1975			ex-type culture of Cryptococcus saitoi
1294	Cathie Aime	Dioszegia hungarica	complete ITS1_5.8S_ITS2	Yes	Eukaryota; Fungi; Dikarya; Basidiomycota; Agaricomycotina; Tremellomycetes; Tremellales; mitosporic Tremellales; Dioszegia	Dioszegia hungarica	4972	AF444379	NR_073227	CBS:4214	CBS 4214			ex-type culture of Dioszegia hungarica
1295		Cryptococcus gilvescens	complete ITS1_5.8S_ITS2	Yes	Eukaryota; Fungi; Dikarya; Basidiomycota; Agaricomycotina; Tremellomycetes; Filobasidiales; mitosporic Filobasidiales; Cryptococcus	Cryptococcus gilvescens	104405	AF444380	NR_073228	CBS:7525	CBS 7525			ex-type culture of Cryptococcus gilvescens
1296	Cathie Aime	Filobasidium capsuligenum	complete ITS1_5.8S_ITS2	Yes	Eukaryota; Fungi; Dikarya; Basidiomycota; Agaricomycotina; Tremellomycetes; Filobasidiales; Filobasidiaceae; Filobasidium	Filobasidium capsuligenum	5211	AF444381	NR_073229	CBS:1906	CBS 1906			ex-type culture of Filobasidium capsuligenum
1297		Trichosporon smithiae	complete ITS1_5.8S_ITS2	Yes	Eukaryota; Fungi; Dikarya; Basidiomycota; Agaricomycotina; Tremellomycetes; Tremellales; mitosporic Tremellales; Trichosporon	Trichosporon smithiae	1105093	AF444397	NR_073230	CBS:8370	CBS 8370			ex-type culture of Trichosporon smithiae
1298		Bullera pseudoalba	complete ITS1_5.8S_ITS2	Yes	Eukaryota; Fungi; Dikarya; Basidiomycota; Agaricomycotina; Tremellomycetes; Tremellales; mitosporic Tremellales; Bullera	Bullera pseudoalba	4981	AF444399	NR_073231	CBS:7227	CBS 7227			ex-type culture of Bullera pseudoalba
1299	Cathie Aime	Cystofilobasidium infirmominiatum	complete ITS1_5.8S_ITS2	CACTA	Eukaryota; Fungi; Dikarya; Basidiomycota; Agaricomycotina; Tremellomycetes; Cystofilobasidiales; Cystofilobasidiaceae; Cystofilobasidium	Cystofilobasidium infirmominiatum	89913	AF444400	NR_073232	CBS:323	CBS 323			ex-type culture of Rhodosporidium infirmo-miniatum
1300		Udeniomyces pyricola	complete ITS1_5.8S_ITS2	CACTA	Eukaryota; Fungi; Dikarya; Basidiomycota; Agaricomycotina; Tremellomycetes; Cystofilobasidiales; mitosporic Cystofilobasidiales; Udeniomyces	Udeniomyces pyricola	42661	AF444402	NR_073233	CBS:6754	CBS 6754			ex-type culture of Bullera pyricola
1301		Fellomyces horovitziae	complete ITS1_5.8S_ITS2	Yes	Eukaryota; Fungi; Dikarya; Basidiomycota; Agaricomycotina; Tremellomycetes; Tremellales; mitosporic Tremellales; Fellomyces	Fellomyces horovitziae	76002	AF444404	NR_073234	CBS:7515	CBS 7515			ex-type culture of Fellomyces horovitziae
1302		Bullera globospora	complete ITS1_5.8S_ITS2	Yes	Eukaryota; Fungi; Dikarya; Basidiomycota; Agaricomycotina; Tremellomycetes; Tremellales; mitosporic Tremellales; Bullera	Bullera globospora	4976	AF444407	NR_073235	CBS:6981	CBS 6981			ex-type culture of Bullera globispora
1303		Udeniomyces megalosporus	complete ITS1_5.8S_ITS2	CACTA	Eukaryota; Fungi; Dikarya; Basidiomycota; Agaricomycotina; Tremellomycetes; Cystofilobasidiales; mitosporic Cystofilobasidiales; Udeniomyces	Udeniomyces megalosporus	42659	AF444408	NR_073236	CBS:7236	CBS 7236			ex-type culture of Bullera megalospora
1304		Bullera miyagiana	complete ITS1_5.8S_ITS2	Yes	Eukaryota; Fungi; Dikarya; Basidiomycota; Agaricomycotina; Tremellomycetes; Tremellales; mitosporic Tremellales; Bullera	Bullera miyagiana	4978	AF444409	NR_073237	CBS:7526	CBS 7526			ex-type culture of Bullera miyagiana
1305		Fellomyces polyborus	complete ITS1_5.8S_ITS2	Yes	Eukaryota; Fungi; Dikarya; Basidiomycota; Agaricomycotina; Tremellomycetes; Tremellales; mitosporic Tremellales; Fellomyces	Fellomyces polyborus	5611	AF444411	NR_073238	CBS:6072	CBS 6072			ex-type culture of Sterigmatomyces polyborus
1306		Trichosporon domesticum	complete ITS1_5.8S_ITS2	Yes	Eukaryota; Fungi; Dikarya; Basidiomycota; Agaricomycotina; Tremellomycetes; Tremellales; mitosporic Tremellales; Trichosporon	Trichosporon domesticum	82514	AF444414	NR_073239	CBS:8280	CBS 8280			ex-type culture of Trichosporon domesticum
1307		Trichosporon moniliiforme	complete ITS1_5.8S_ITS2	Yes	Eukaryota; Fungi; Dikarya; Basidiomycota; Agaricomycotina; Tremellomycetes; Tremellales; mitosporic Tremellales; Trichosporon	Trichosporon moniliiforme	5556	AF444415	NR_073240	CBS:2467	CBS 2467			ex-type culture of Oidium moniliiforme
1308		Trichosporon asteroides	complete ITS1_5.8S_ITS2	Yes	Eukaryota; Fungi; Dikarya; Basidiomycota; Agaricomycotina; Tremellomycetes; Tremellales; mitosporic Tremellales; Trichosporon	Trichosporon asteroides	82511	AF444416	NR_073241	CBS:2481	CBS 2481			ex-type culture of Parendomyces asteroides
1309		Trichosporon faecale	complete ITS1_5.8S_ITS2	Yes	Eukaryota; Fungi; Dikarya; Basidiomycota; Agaricomycotina; Tremellomycetes; Tremellales; mitosporic Tremellales; Trichosporon	Trichosporon faecale	82510	AF444419	NR_073242	CBS:4828	CBS 4828			ex-type culture of Endomycopsis mali var. faecalis
1310		Trichosporon inkin	complete ITS1_5.8S_ITS2	Yes	Eukaryota; Fungi; Dikarya; Basidiomycota; Agaricomycotina; Tremellomycetes; Tremellales; mitosporic Tremellales; Trichosporon	Trichosporon inkin	82517	AF444420	NR_073243	CBS:5585	CBS 5585			ex-neotype culture of Sarcinomyces inkin
1311		Trichosporon laibachii	complete ITS1_5.8S_ITS2	Yes	Eukaryota; Fungi; Dikarya; Basidiomycota; Agaricomycotina; Tremellomycetes; Tremellales; mitosporic Tremellales; Trichosporon	Trichosporon laibachii	82520	AF444421	NR_073244	CBS:5790	CBS 5790			ex-type culture of Endomyces laibachii
1312		Trichosporon montevideense	complete ITS1_5.8S_ITS2	Yes	Eukaryota; Fungi; Dikarya; Basidiomycota; Agaricomycotina; Tremellomycetes; Tremellales; mitosporic Tremellales; Trichosporon	Trichosporon montevideense	82521	AF444422	NR_073245	CBS:6721	CBS 6721			ex-type culture of Endomycopsis montevideensis
1313		Trichosporon mucoides	complete ITS1_5.8S_ITS2	Yes	Eukaryota; Fungi; Dikarya; Basidiomycota; Agaricomycotina; Tremellomycetes; Tremellales; mitosporic Tremellales; Trichosporon	Trichosporon mucoides	82522	AF444423	NR_073246	CBS:7625	CBS 7625			ex-type culture of Trichosporon mucoides
1314		Trichosporon gamsii	complete ITS1_5.8S_ITS2	Yes	Eukaryota; Fungi; Dikarya; Basidiomycota; Agaricomycotina; Tremellomycetes; Tremellales; mitosporic Tremellales; Trichosporon	Trichosporon gamsii	1105092	AF444424	NR_073247	CBS:8245	CBS 8245			ex-type culture of Trichosporon gamsii
1315		Trichosporon dulcitum	complete ITS1_5.8S_ITS2	Yes	Eukaryota; Fungi; Dikarya; Basidiomycota; Agaricomycotina; Tremellomycetes; Tremellales; mitosporic Tremellales; Trichosporon	Trichosporon dulcitum	82515	AF444428	NR_073248	CBS:8257	CBS 8257			ex-type culture of Oospora dulcita
1316		Trichosporon coremiiforme	complete ITS1_5.8S_ITS2	Yes	Eukaryota; Fungi; Dikarya; Basidiomycota; Agaricomycotina; Tremellomycetes; Tremellales; mitosporic Tremellales; Trichosporon	Trichosporon coremiiforme	82509	AF444434	NR_073249	CBS:2482	CBS 2482			ex-type culture of Hemispora coremiiformis
1317		Udeniomyces puniceus	complete ITS1_5.8S_ITS2	CACTA	Eukaryota; Fungi; Dikarya; Basidiomycota; Agaricomycotina; Tremellomycetes; Cystofilobasidiales; mitosporic Cystofilobasidiales; Udeniomyces	Udeniomyces puniceus	42660	AF444435	NR_073250	CBS:5689	CBS 5689			ex-type culture of Candida punicea
1318		Trichosporon brassicae	complete ITS1_5.8S_ITS2	Yes	Eukaryota; Fungi; Dikarya; Basidiomycota; Agaricomycotina; Tremellomycetes; Tremellales; mitosporic Tremellales; Trichosporon	Trichosporon brassicae	82513	AF444436	NR_073251	CBS:6382	CBS 6382			ex-type culture of Trichosporon brassicae
1319		Trichosporon jirovecii	complete ITS1_5.8S_ITS2	Yes	Eukaryota; Fungi; Dikarya; Basidiomycota; Agaricomycotina; Tremellomycetes; Tremellales; mitosporic Tremellales; Trichosporon	Trichosporon jirovecii	82518	AF444437	NR_073252	CBS:6864	CBS 6864			ex-type culture of Trichosporon jirovecii
1320		Trichosporon loubieri	complete ITS1_5.8S_ITS2	Yes	Eukaryota; Fungi; Dikarya; Basidiomycota; Agaricomycotina; Tremellomycetes; Tremellales; mitosporic Tremellales; Trichosporon	Trichosporon loubieri	82519	AF444438	NR_073253	CBS:7065	CBS 7065			ex-type culture of Geotrichum loubieri
1321		Trichosporon ovoides	complete ITS1_5.8S_ITS2	Yes	Eukaryota; Fungi; Dikarya; Basidiomycota; Agaricomycotina; Tremellomycetes; Tremellales; mitosporic Tremellales; Trichosporon	Trichosporon ovoides	82524	AF444439	NR_073254	CBS:7556	CBS 7556			ex-neotype culture of Trichosporon ovoides
1322		Trichosporon gracile	complete ITS1_5.8S_ITS2	Yes	Eukaryota; Fungi; Dikarya; Basidiomycota; Agaricomycotina; Tremellomycetes; Tremellales; mitosporic Tremellales; Trichosporon	Trichosporon gracile	82516	AF444440	NR_073255	CBS:8189	CBS 8189			ex-type culture of Oidium gracile
1323		Bullera unica	complete ITS1_5.8S_ITS2	Yes	Eukaryota; Fungi; Dikarya; Basidiomycota; Agaricomycotina; Tremellomycetes; Tremellales; mitosporic Tremellales; Bullera	Bullera unica	57474	AF444441	NR_073256	CBS:8290	CBS 8290			ex-type culture of Bullera unica
1324		Bullera dendrophila	complete ITS1_5.8S_ITS2	CAGTA	Eukaryota; Fungi; Dikarya; Basidiomycota; Agaricomycotina; Tremellomycetes; Tremellales; mitosporic Tremellales; Bullera	Bullera dendrophila	4975	AF444443	NR_073257	CBS:6074	CBS 6074			ex-type culture of Bullera dendrophila
1325		Fellomyces chinensis	complete ITS1_5.8S_ITS2	Yes	Eukaryota; Fungi; Dikarya; Basidiomycota; Agaricomycotina; Tremellomycetes; Tremellales; mitosporic Tremellales; Fellomyces	Fellomyces chinensis	104677	AF444460	NR_073258	CBS:8278	CBS 8278			ex-type culture of Fellomyces chinensis
1326		Fellomyces sichuanensis	complete ITS1_5.8S_ITS2	Yes	Eukaryota; Fungi; Dikarya; Basidiomycota; Agaricomycotina; Tremellomycetes; Tremellales; mitosporic Tremellales; Fellomyces	Fellomyces sichuanensis	104679	AF444461	NR_073259	CBS:8318	CBS 8318			ex-type culture of Fellomyces sichuanensis
1327		Cryptococcus victoriae	complete ITS1_5.8S_ITS2	Yes	Eukaryota; Fungi; Dikarya; Basidiomycota; Agaricomycotina; Tremellomycetes; Tremellales; mitosporic Tremellales; Cryptococcus	Cryptococcus victoriae	156168	AF444469	NR_073260	CBS:8685	CBS 8685			ex-type culture of Cryptococcus victoriae
1328		Trichosporon sporotrichoides	complete ITS1_5.8S_ITS2	Yes	Eukaryota; Fungi; Dikarya; Basidiomycota; Agaricomycotina; Tremellomycetes; Tremellales; mitosporic Tremellales; Trichosporon	Trichosporon sporotrichoides	82526	AF444470	NR_073261	CBS:8246	CBS 8246			ex-type culture of Trichosporiella sporotrichoides
1329		Bullera penniseticola	complete ITS1_5.8S_ITS2	Yes	Eukaryota; Fungi; Dikarya; Basidiomycota; Agaricomycotina; Tremellomycetes; Tremellales; mitosporic Tremellales; Bullera	Bullera penniseticola	62610	AF444471	NR_073262	CBS:8623	CBS 8623			ex-type culture of Bullera penniseticola
1330		Trichosporon japonicum	complete ITS1_5.8S_ITS2	Yes	Eukaryota; Fungi; Dikarya; Basidiomycota; Agaricomycotina; Tremellomycetes; Tremellales; mitosporic Tremellales; Trichosporon	Trichosporon japonicum	85853	AF444473	NR_073263	CBS:8641	CBS 8641			ex-type culture of Trichosporon japonicum
1331		Fellomyces ogasawarensis	complete ITS1_5.8S_ITS2	Yes	Eukaryota; Fungi; Dikarya; Basidiomycota; Agaricomycotina; Tremellomycetes; Tremellales; mitosporic Tremellales; Fellomyces	Fellomyces ogasawarensis	76003	AF444474	NR_073264	CBS:8544	CBS 8544			ex-type culture of Fellomyces ogasawarensis
1332	Cathie Aime	Rhodosporidium paludigenum	complete ITS1_5.8S_ITS2	Yes	Eukaryota; Fungi; Dikarya; Basidiomycota; Pucciniomycotina; Microbotryomycetes; Sporidiobolales; Rhodosporidium	Rhodosporidium paludigenum	86838	AF444492	NR_073265	CBS:6566	CBS 6566			ex-type culture of Rhodosporidium paludigenum
1333	Cathie Aime	Kurtzmanomyces nectairei	complete ITS1_5.8S_ITS2	Yes	Eukaryota; Fungi; Dikarya; Basidiomycota; Pucciniomycotina; Agaricostilbomycetes; Agaricostilbomycetes incertae sedis; mitosporic Agaricostilbomycetidae; Kurtzmanomyces	Kurtzmanomyces nectairei	5613	AF444494	NR_073266	CBS:6405	CBS 6405			ex-type culture of Sterigmatomyces nectairei
1334	Cathie Aime	Leucosporidium scottii	complete ITS1_5.8S_ITS2	Yes	Eukaryota; Fungi; Dikarya; Basidiomycota; Pucciniomycotina; Microbotryomycetes; Leucosporidiales; Leucosporidium	Leucosporidium scottii	5278	AF444495	NR_073267	CBS:5930	CBS 5930			ex-type culture of Leucosporidium scottii
1335	Cathie Aime	Kondoa malvinella	complete ITS1_5.8S_ITS2	Yes	Eukaryota; Fungi; Dikarya; Basidiomycota; Pucciniomycotina; Agaricostilbomycetes; Agaricostilbomycetes incertae sedis; Kondoa	Kondoa malvinella	36055	AF444498	NR_073268	CBS:6082	CBS 6082			ex-type culture of Rhodosporidium malvinellum
1336	Cathie Aime	Rhodosporidium sphaerocarpum	complete ITS1_5.8S_ITS2	Yes	Eukaryota; Fungi; Dikarya; Basidiomycota; Pucciniomycotina; Microbotryomycetes; Sporidiobolales; Rhodosporidium	Rhodosporidium sphaerocarpum	86839	AF444499	NR_073269	CBS:5939	CBS 5939			ex-type culture of Rhodosporidium sphaerocarpum
1338	Cathie Aime	Rhodosporidium diobovatum	complete ITS1_5.8S_ITS2	Yes	Eukaryota; Fungi; Dikarya; Basidiomycota; Pucciniomycotina; Microbotryomycetes; Sporidiobolales; Rhodosporidium	Rhodosporidium diobovatum	5288	AF444502	NR_073271	CBS:6085	CBS 6085			ex-type culture of Rhodosporidium diobovatum
1339		Rhodotorula marina	complete ITS1_5.8S_ITS2	Yes	Eukaryota; Fungi; Dikarya; Basidiomycota; Pucciniomycotina; Cystobasidiomycetes; Erythrobasidiales; Erythrobasidiaceae; Rhodotorula	Rhodotorula marina	106013	AF444504	NR_073272	CBS:2365	CBS 2365			ex-type culture of Rhodotorula marina
1340		Rhodotorula graminis	complete ITS1_5.8S_ITS2	Yes	Eukaryota; Fungi; Dikarya; Basidiomycota; Pucciniomycotina; Microbotryomycetes; Sporidiobolales; mitosporic Sporidiobolales; Rhodotorula	Rhodotorula graminis	29898	AF444505	NR_073273	CBS:2826	CBS 2826			ex-type culture of Rhodotorula graminis
1341		Rhodotorula philyla	complete ITS1_5.8S_ITS2	Yes	Eukaryota; Fungi; Dikarya; Basidiomycota; Pucciniomycotina; Microbotryomycetes; Microbotryomycetes incertae sedis; mitosporic Microbotryomycetidae incertae sedis; Rhodotorula	Rhodotorula philyla	89933	AF444506	NR_073274	CBS:6272	CBS 6272			ex-type culture of Torulopsis philyla
1342		Rhodotorula auriculariae	complete ITS1_5.8S_ITS2	Yes	Eukaryota; Fungi; Dikarya; Basidiomycota; Pucciniomycotina; Microbotryomycetes; Microbotryomycetes incertae sedis; mitosporic Microbotryomycetidae incertae sedis; Rhodotorula	Rhodotorula auriculariae	106005	AF444507	NR_073275	CBS:6379	CBS 6379			ex-type culture of Torulopsis auriculariae
1343	Cathie Aime	Leucosporidium fellii	complete ITS1_5.8S_ITS2	Yes	Eukaryota; Fungi; Dikarya; Basidiomycota; Pucciniomycotina; Microbotryomycetes; Leucosporidiales; Leucosporidium	Leucosporidium fellii	105988	AF444508	NR_073276	CBS:7287	CBS 7287			ex-type culture of Leucosporidium fellii
1344		Rhodotorula araucariae	complete ITS1_5.8S_ITS2	Yes	Eukaryota; Fungi; Dikarya; Basidiomycota; Pucciniomycotina; Microbotryomycetes; Sporidiobolales; mitosporic Sporidiobolales; Rhodotorula	Rhodotorula araucariae	86829	AF444510	NR_073277	CBS:6031	CBS 6031			ex-type culture of Rhodotorula araucariae
1345	Cathie Aime	Bensingtonia phyllada	complete ITS1_5.8S_ITS2	Yes	Eukaryota; Fungi; Dikarya; Basidiomycota; Pucciniomycotina; Agaricostilbomycetes; Agaricostilbomycetes incertae sedis; mitosporic Agaricostilbomycetidae; Bensingtonia	Bensingtonia phyllada	105982	AF444514	NR_073278	CBS:7169	CBS 7169			ex-type culture of Bensingtonia phyllada
1346	Cathie Aime	Bensingtonia miscanthi	complete ITS1_5.8S_ITS2	Yes	Eukaryota; Fungi; Dikarya; Basidiomycota; Pucciniomycotina; Agaricostilbomycetes; Agaricostilbomycetes incertae sedis; mitosporic Agaricostilbomycetidae; Bensingtonia	Bensingtonia miscanthi	4992	AF444516	NR_073279	CBS:7282	CBS 7282			ex-type culture of Sporobolomyces miscanthi
1347	Cathie Aime	Bensingtonia yuccicola	complete ITS1_5.8S_ITS2	Yes	Eukaryota; Fungi; Dikarya; Basidiomycota; Pucciniomycotina; Agaricostilbomycetes; Agaricostilbomycetes incertae sedis; mitosporic Agaricostilbomycetidae; Bensingtonia	Bensingtonia yuccicola	4997	AF444518	NR_073280	CBS:7331	CBS 7331			ex-type culture of Sporobolomyces yuccicola
1348	Cathie Aime	Bensingtonia ingoldii	complete ITS1_5.8S_ITS2	Yes	Eukaryota; Fungi; Dikarya; Basidiomycota; Pucciniomycotina; Agaricostilbomycetes; Agaricostilbomycetes incertae sedis; mitosporic Agaricostilbomycetidae; Bensingtonia	Bensingtonia ingoldii	4990	AF444519	NR_073281	CBS:7424	CBS 7424			ex-type culture of Bensingtonia ingoldii
1349	Cathie Aime	Rhodosporidium kratochvilovae	complete ITS1_5.8S_ITS2	Yes	Eukaryota; Fungi; Dikarya; Basidiomycota; Pucciniomycotina; Microbotryomycetes; Sporidiobolales; Rhodosporidium	Rhodosporidium kratochvilovae	86836	AF444520	NR_073282	CBS:7436	CBS 7436			ex-type culture of Rhodosporidium kratochvilovae
1350		Sporobolomyces foliicola	complete ITS1_5.8S_ITS2	Yes	Eukaryota; Fungi; Dikarya; Basidiomycota; Pucciniomycotina; Cystobasidiomycetes; Erythrobasidiales; Erythrobasidiaceae; Sporobolomyces	Sporobolomyces foliicola	5434	AF444521	NR_073283	CBS:8075	CBS 8075			ex-type culture of Sporobolomyces foliicola
1351		Rhodotorula armeniaca	complete ITS1_5.8S_ITS2	Yes	Eukaryota; Fungi; Dikarya; Basidiomycota; Pucciniomycotina; Cystobasidiomycetes; Erythrobasidiales; Erythrobasidiaceae; Rhodotorula	Rhodotorula armeniaca	106001	AF444523	NR_073284	CBS:8076	CBS 8076			ex-type culture of Rhodotorula armeniaca
1352		Rhodotorula hordea	complete ITS1_5.8S_ITS2	Yes	Eukaryota; Fungi; Dikarya; Basidiomycota; Pucciniomycotina; Microbotryomycetes; Microbotryales; mitosporic Microbotryales; Rhodotorula	Rhodotorula hordea	106009	AF444524	NR_073285	CBS:6403	CBS 6403			ex-type culture of Rhodotorula hordea
1353		Leucosporidiella muscorum	complete ITS1_5.8S_ITS2	Yes	Eukaryota; Fungi; Dikarya; Basidiomycota; Pucciniomycotina; Microbotryomycetes; Leucosporidiales; Leucosporidiella	Leucosporidiella muscorum	86831	AF444527	NR_073286	CBS:6921	CBS 6921			ex-type culture of Candida muscorum
1354		Leucosporidiella fragaria	complete ITS1_5.8S_ITS2	Yes	Eukaryota; Fungi; Dikarya; Basidiomycota; Pucciniomycotina; Microbotryomycetes; Leucosporidiales; Leucosporidiella	Leucosporidiella fragaria	86830	AF444530	NR_073287	CBS:6254	CBS 6254			ex-type culture of Torulopsis fragaria
1355		Rhodotorula pustula	complete ITS1_5.8S_ITS2	Yes	Eukaryota; Fungi; Dikarya; Basidiomycota; Pucciniomycotina; Microbotryomycetes; Microbotryomycetes incertae sedis; mitosporic Microbotryomycetidae incertae sedis; Rhodotorula	Rhodotorula pustula	106017	AF444531	NR_073288	CBS:6527	CBS 6527			ex-type culture of Torulopsis pustula
1356		Rhodotorula diffluens	complete ITS1_5.8S_ITS2	Yes	Eukaryota; Fungi; Dikarya; Basidiomycota; Pucciniomycotina; Microbotryomycetes; Microbotryomycetes incertae sedis; mitosporic Microbotryomycetidae incertae sedis; Rhodotorula	Rhodotorula diffluens	89932	AF444533	NR_073289	CBS:5233	CBS 5233			ex-type culture of Candida diffluens
1357	Cathie Aime	Sporidiobolus microsporus	complete ITS1_5.8S_ITS2	Yes	Eukaryota; Fungi; Dikarya; Basidiomycota; Pucciniomycotina; Microbotryomycetes; Sporidiobolales; Sporidiobolus	Sporidiobolus microsporus	86835	AF444535	NR_073290	CBS:7041	CBS 7041			ex-type culture of Sporidiobolus microsporus
1358		Rhodotorula bogoriensis	complete ITS1_5.8S_ITS2	Yes	Eukaryota; Fungi; Dikarya; Basidiomycota; Pucciniomycotina; Microbotryomycetes; Microbotryomycetes incertae sedis; mitosporic Microbotryomycetidae incertae sedis; Rhodotorula	Rhodotorula bogoriensis	106002	AF444536	NR_073291	CBS:4101	CBS 4101			ex-type culture of Candida bogoriensis
1359		Rhodotorula nothofagi	complete ITS1_5.8S_ITS2	Yes	Eukaryota; Fungi; Dikarya; Basidiomycota; Pucciniomycotina; Microbotryomycetes; Microbotryomycetes incertae sedis; mitosporic Microbotryomycetidae incertae sedis; Rhodotorula	Rhodotorula nothofagi	114767	AF444537	NR_073292	CBS:8166	CBS 8166			ex-type culture of Rhodotorula nothofagi
1360		Rhodotorula aurantiaca	complete ITS1_5.8S_ITS2	Yes	Eukaryota; Fungi; Dikarya; Basidiomycota; Pucciniomycotina; Cystobasidiomycetes; Erythrobasidiales; Erythrobasidiaceae; Rhodotorula	Rhodotorula aurantiaca	91979	AF444538	NR_073293	CBS:317	CBS 317			ex-type culture of Torula aurantiaca
[truncated: 1,360 more rows]
