# Supplementary material for: Finding needles in haystacks: linking scientific names, reference specimens and molecular data for Fungi
Source: Oxford University Press journal article supplement (doi:10.1093/database/bau061), 2014-06-30
Supplement: bau061_Supplementary_Data.zip [file bau061_Supplementary_Data.zip › NIH_Agreement_2.pdf]

# NIH Publishing Agreement & Manuscript *Cover Sheet*

By signing this Cover Sheet, the Author, on behalf of NIH, agrees to the provisions set out below, which **modify and supersede**, solely with respect to NIH, any conflicting or ambiguous provisions that are in the Publisher's standard copyright agreement (the "Publisher's Agreement"). NIH and Author accept only those provisions of the Publisher's Agreement that are consistent with the provisions herein, and only to the extent that they are directly related to the disposition of copyrights or duties of the parties that are directly related to the subject "Work."

1. **Indemnification.** No Indemnification or "hold harmless" obligation is provided by either party.
2. **Governing Law.** This agreement will be governed by the law of the court in which a claim is brought.
3. **Copyright.** Author's contribution to the Work was done as part of the Author's official duties as a NIH employee and is a Work of the United States Government. Therefore, copyright may not be established in the United States. 17 U.S.C. § 105. If Publisher intends to disseminate the Work outside of the U.S., Publisher may secure copyright to the extent authorized under the domestic laws of the relevant country, subject to a paid-up, nonexclusive, irrevocable worldwide license to the United States in such copyrighted work to reproduce, prepare derivative works, distribute copies to the public and perform publicly and display publicly the work, and to permit others to do so.
4. **No Compensation.** No royalty income or other compensation may be accepted for work done as part of official duties. The author may accept for the agency a limited number of reprints or copies of the publication.
5. **NIH Representations.** NIH represents to the Publisher that the Author is the sole author of the Author's contribution to the Work and that NIH is the owner of the rights that are the subject of this agreement; that the Work is an original work and has not previously been published in any form anywhere in the world; that to the best of NIH's knowledge the Work is not a violation of any existing copyright, moral right, database right, or of any right of privacy or other intellectual property, personal, proprietary or statutory right; that where the Author is responsible for obtaining permissions or assisting the Publishers in obtaining permissions for the use of third party material, all relevant permissions and information have been secured; and that the Work contains nothing misleading, obscene, libelous or defamatory or otherwise unlawful.
6. **Disclaimer.** NIH and the Author expressly disclaim any obligation that is not consistent with the Author's official duties or the NIH mission.
7. **For Peer-Reviewed Papers to be submitted to PubMed Central.** The Author is a US government employee who must comply with the NIH Public Access Policy, and the Author or NIH will deposit, or have deposited, in NIH's PubMed Central archive, an electronic version of the final, peer-reviewed manuscript upon acceptance for publication, to be made publicly available no later than 12 months after the official date of publication. PubMed Central may tag or modify the work consistent with its customary practices.

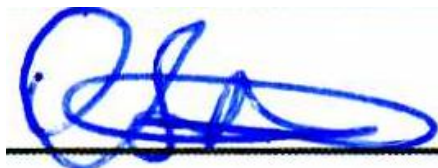

Signature of Author

04/03/2014  
Date

Conrad L. Schoch

Name of Author

/S/  
Michael Gottesman, M.D., NIH DDIR
